# Supplementary material for: Comparative efficacy and safety of second-line treatments for advanced non-small cell lung cancer with wild-type or unknown status for epidermal growth factor receptor: a systematic review and network meta-analysis
Source: PubMed Central journal article supplement (PMC5662096; doi:10.1186/s12916-017-0954-x), 2017-10-30
Supplement: 12916_2017_954_MOESM2_ESM.pdf [file 12916_2017_954_MOESM2_ESM.pdf]

## Supplementary appendix figures for

### **“Comparative efficacy and safety of second-line treatments for advanced non–small-cell lung cancer with wild-type or unknown status for epidermal growth factor receptor: a systematic review and network meta-analyses”**

|                                                                                                                                                      |      |
|------------------------------------------------------------------------------------------------------------------------------------------------------|------|
| Appendix Figure 1: Forest plots for 4 outcomes.....                                                                                                  | p2   |
| Appendix Figure 2: Cumulative ranking curves and SUCRA values for 4 outcomes.....                                                                    | p55  |
| Appendix Figure 3: Rankograms for 4 outcomes.....                                                                                                    | p60  |
| Appendix Figure 4: Evaluation of inconsistency.....                                                                                                  | p65  |
| Appendix Figures 5: Subgroup analyses by histology and ethnicity: network graphs of trials for OS, forest plots and SUCRA values for OS and PFS..... | p70  |
| Appendix Figure 6: Funnel plots of small-study effects.....                                                                                          | p120 |
| Appendix Figure 7: Overall assessment of bias.....                                                                                                   | p122 |

**Appendix Figure 1: Forest plots for 4 outcomes**

**(a) Overall survival****Treatments vs. Docetaxel**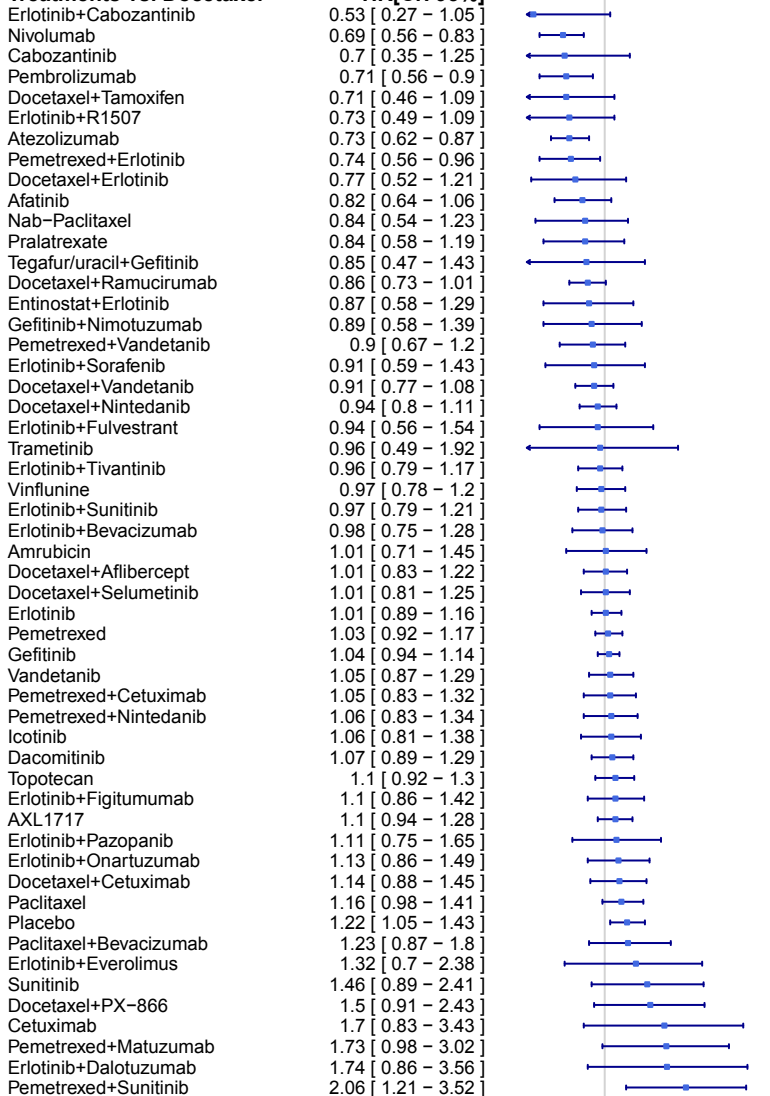

0.50 0.71 1.0 1.41 4.0

## Treatments vs. Pemetrexed

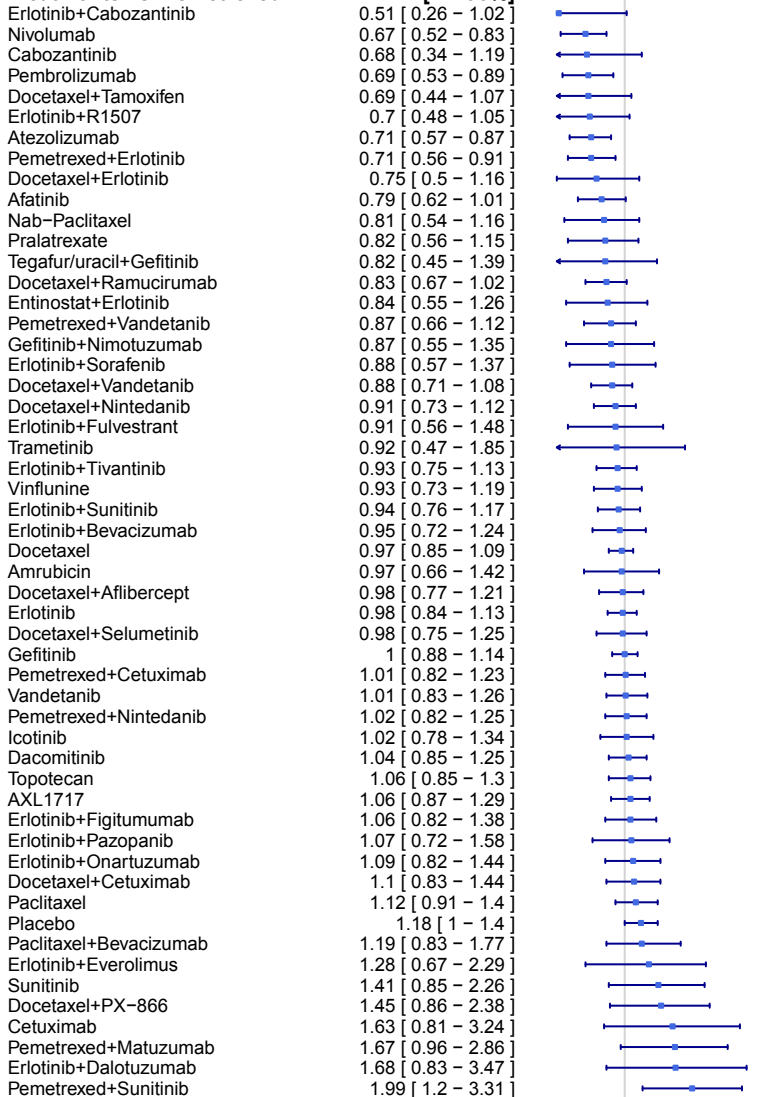

## Treatments vs. Erlotinib

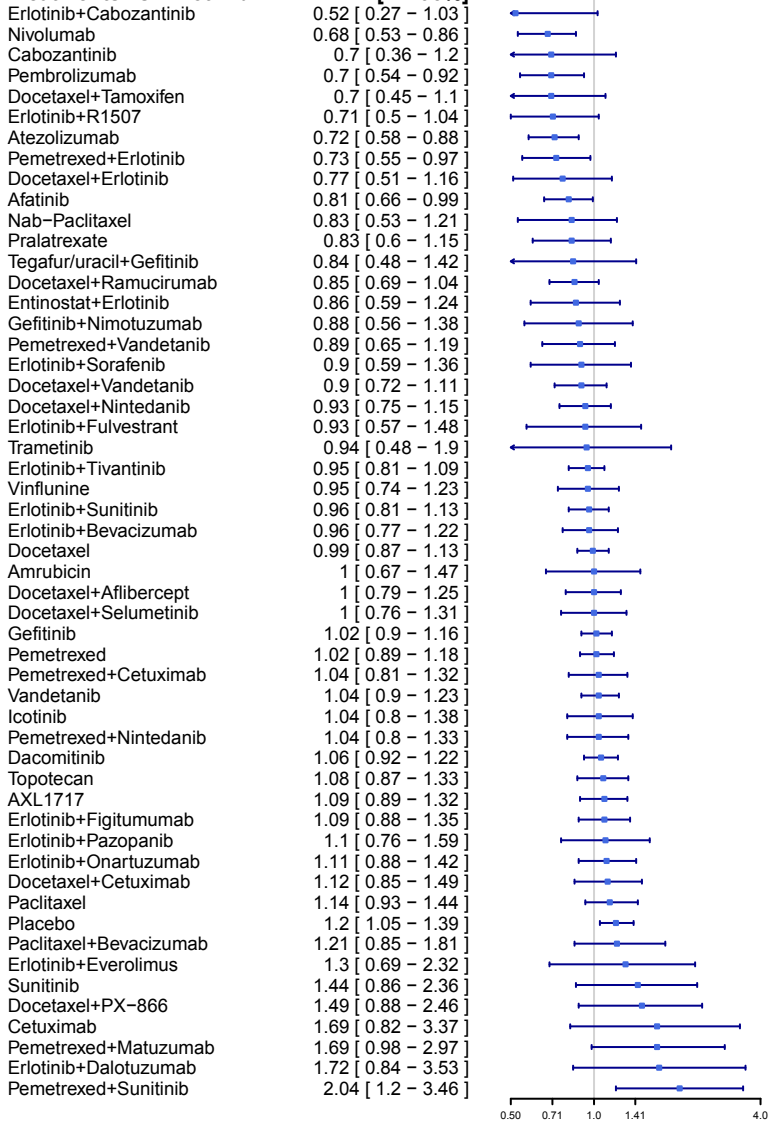

## Treatments vs. Gefitinib

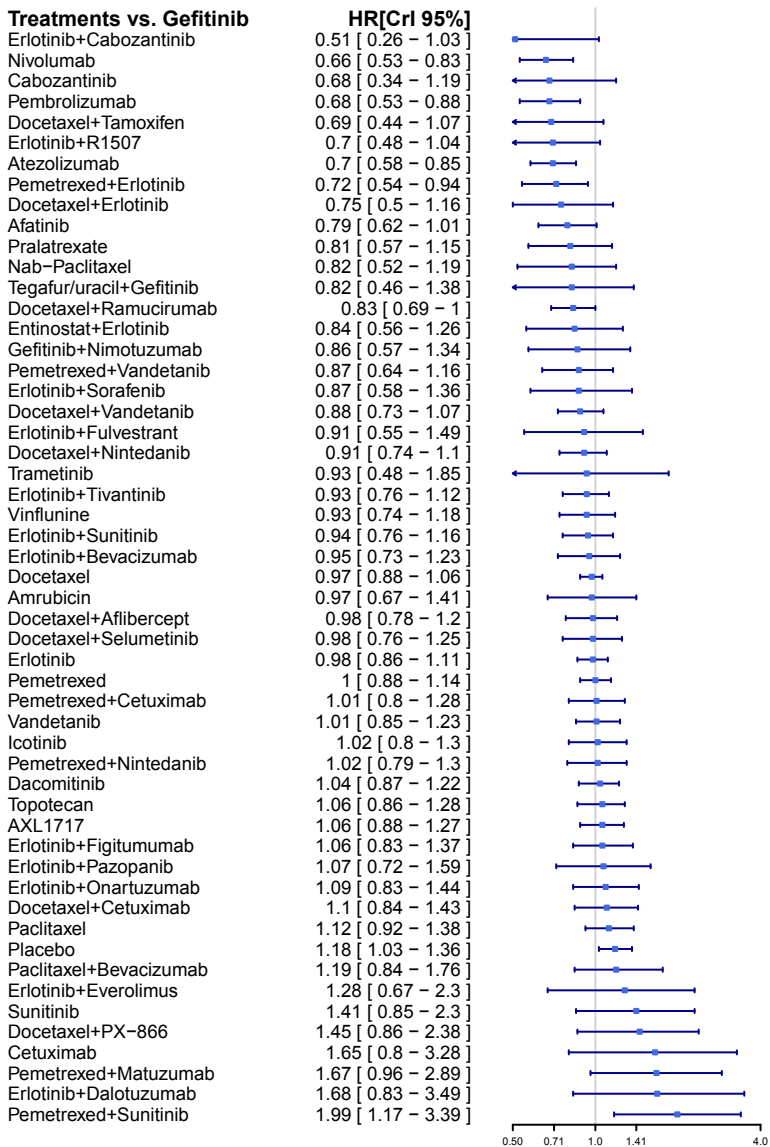

**Treatments vs. Nivolumab**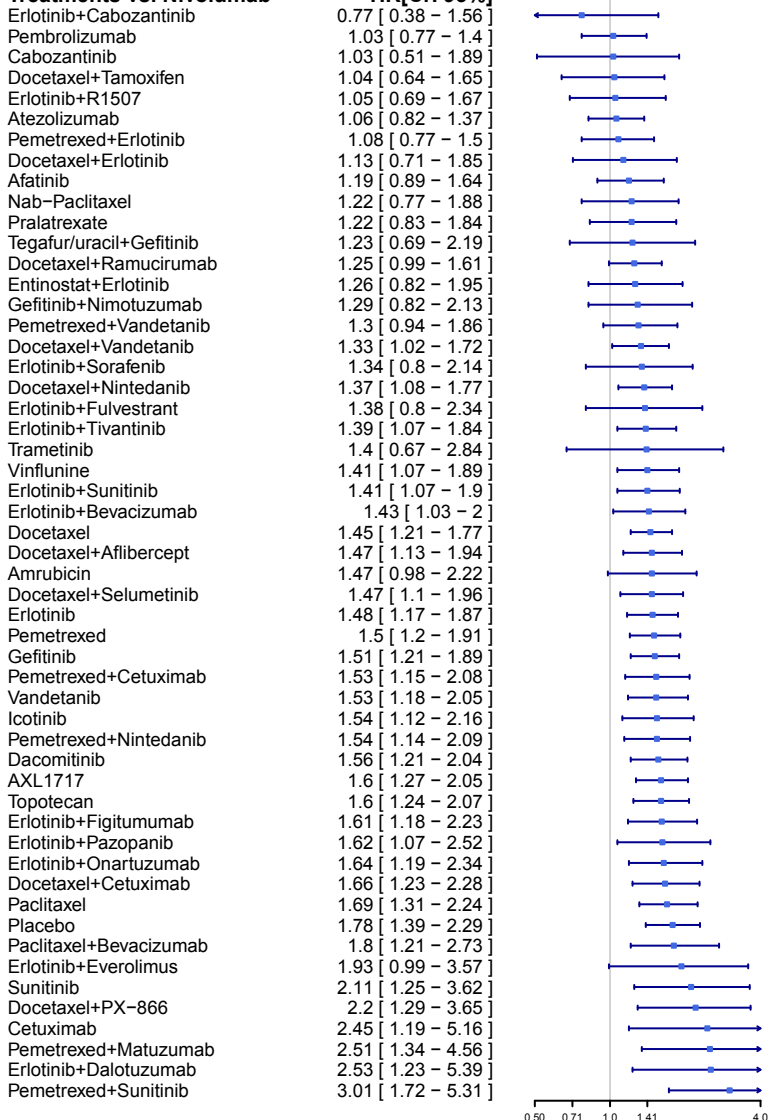

## Treatments vs. Pembrolizumab

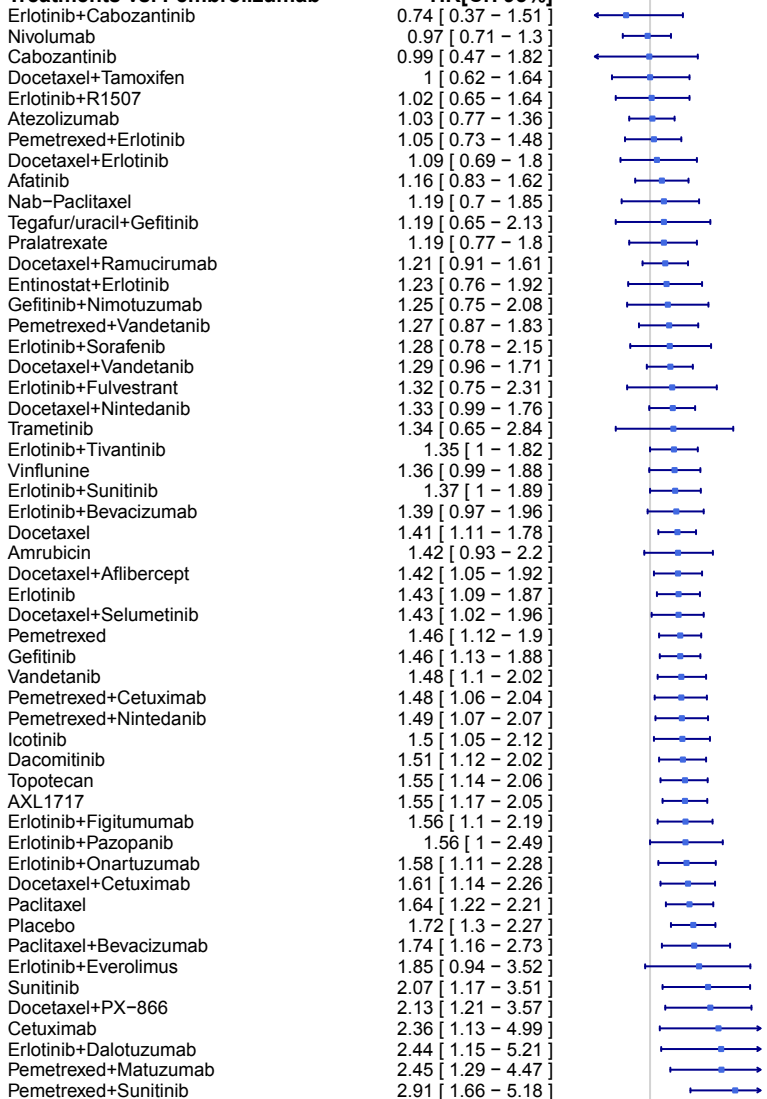

0.50 0.71 1.0 1.41 4.0



## Treatments vs. Atezolizumab

| Treatment                | HR [CrI 95%]       |
|--------------------------|--------------------|
| Erlotinib+Cabozantinib   | 0.73 [0.36 - 1.46] |
| Nivolumab                | 0.94 [0.73 - 1.22] |
| Cabozantinib             | 0.97 [0.48 - 1.76] |
| Pembrolizumab            | 0.97 [0.73 - 1.3]  |
| Docetaxel+Tamoxifen      | 0.98 [0.59 - 1.55] |
| Erlotinib+R1507          | 0.99 [0.66 - 1.53] |
| Pemetrexed+Erlotinib     | 1.01 [0.74 - 1.39] |
| Docetaxel+Erlotinib      | 1.06 [0.63 - 1.72] |
| Afatinib                 | 1.13 [0.84 - 1.54] |
| Nab-Paclitaxel           | 1.15 [0.73 - 1.75] |
| Pralatrexate             | 1.16 [0.78 - 1.72] |
| Tegafur/uracil+Gefitinib | 1.17 [0.64 - 2.04] |
| Docetaxel+Ramucirumab    | 1.18 [0.92 - 1.5]  |
| Entinostat+Erlotinib     | 1.19 [0.78 - 1.84] |
| Gefitinib+Nimotuzumab    | 1.22 [0.77 - 1.98] |
| Pemetrexed+Vandetanib    | 1.23 [0.89 - 1.73] |
| Erlotinib+Sorafenib      | 1.25 [0.79 - 2.02] |
| Docetaxel+Vandetanib     | 1.25 [0.98 - 1.59] |
| Docetaxel+Nintedanib     | 1.29 [1.02 - 1.64] |
| Erlotinib+Fulvestrant    | 1.3 [0.78 - 2.2]   |
| Erlotinib+Tivantinib     | 1.31 [1.02 - 1.7]  |
| Trametinib               | 1.32 [0.68 - 2.63] |
| Erlotinib+Sunitinib      | 1.33 [1.03 - 1.78] |
| Vinflunine               | 1.33 [1.01 - 1.75] |
| Erlotinib+Bevacizumab    | 1.34 [0.98 - 1.85] |
| Docetaxel                | 1.37 [1.15 - 1.62] |
| Amrubicin                | 1.38 [0.94 - 2.09] |
| Docetaxel+Aflibercept    | 1.39 [1.08 - 1.78] |
| Erlotinib                | 1.39 [1.13 - 1.74] |
| Docetaxel+Selumetinib    | 1.39 [1.06 - 1.83] |
| Pemetrexed               | 1.42 [1.15 - 1.77] |
| Gefitinib                | 1.42 [1.17 - 1.74] |
| Pemetrexed+Cetuximab     | 1.44 [1.09 - 1.93] |
| Vandetanib               | 1.44 [1.1 - 1.91]  |
| Icotinib                 | 1.45 [1.07 - 2]    |
| Pemetrexed+Nintedanib    | 1.45 [1.08 - 1.95] |
| Dacomitinib              | 1.47 [1.16 - 1.89] |
| Topotecan                | 1.51 [1.14 - 1.91] |
| Erlotinib+Figitumumab    | 1.51 [1.13 - 2.06] |
| AXL1717                  | 1.51 [1.21 - 1.89] |
| Erlotinib+Pazopanib      | 1.52 [0.99 - 2.38] |
| Erlotinib+Onartuzumab    | 1.55 [1.13 - 2.15] |
| Docetaxel+Cetuximab      | 1.56 [1.15 - 2.11] |
| Paclitaxel               | 1.59 [1.26 - 2.06] |
| Placebo                  | 1.67 [1.35 - 2.12] |
| Paclitaxel+Bevacizumab   | 1.7 [1.16 - 2.55]  |
| Erlotinib+Everolimus     | 1.8 [0.94 - 3.39]  |
| Sunitinib                | 2.01 [1.19 - 3.43] |
| Docetaxel+PX-866         | 2.07 [1.2 - 3.44]  |
| Cetuximab                | 2.34 [1.12 - 4.83] |
| Pemetrexed+Matuzumab     | 2.35 [1.31 - 4.28] |
| Erlotinib+Dalotuzumab    | 2.41 [1.17 - 5]    |
| Pemetrexed+Sunitinib     | 2.8 [1.64 - 4.93]  |

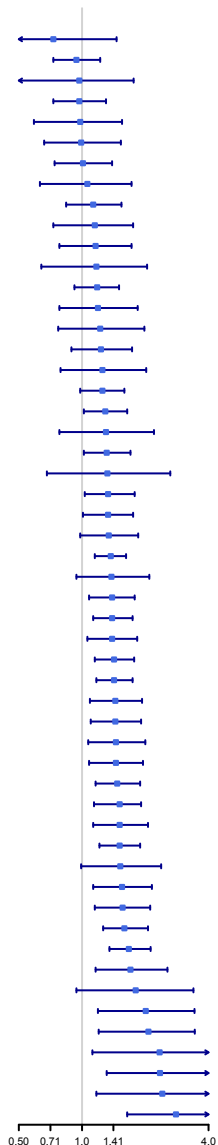

**Treatments vs. Docetaxel+Nintedanib**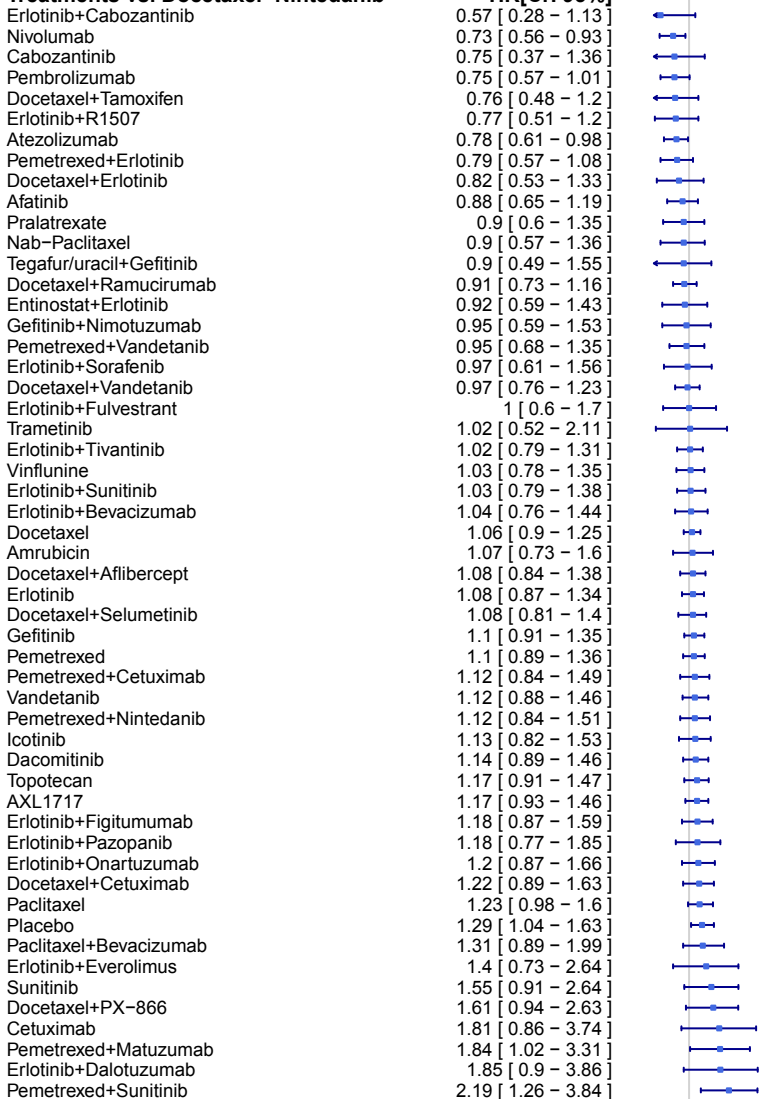

0.50 1.0 4.0

**Treatments vs. Docetaxel+Ramucirumab**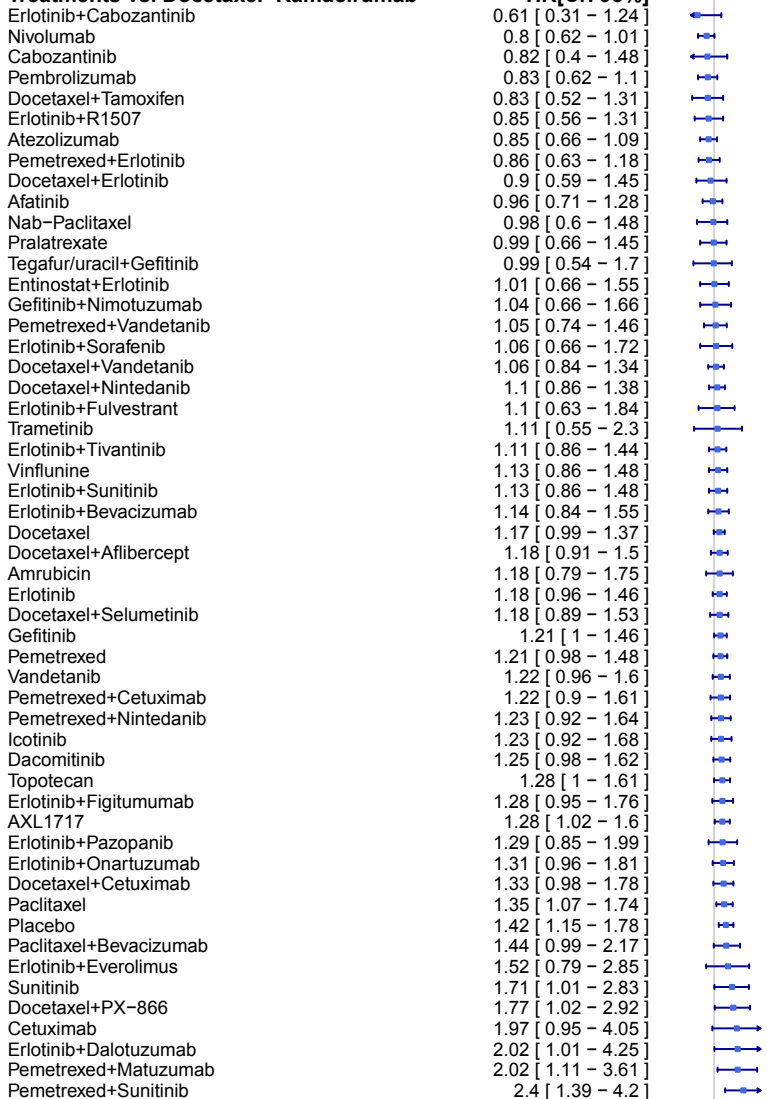

## Treatments vs. Afatinib

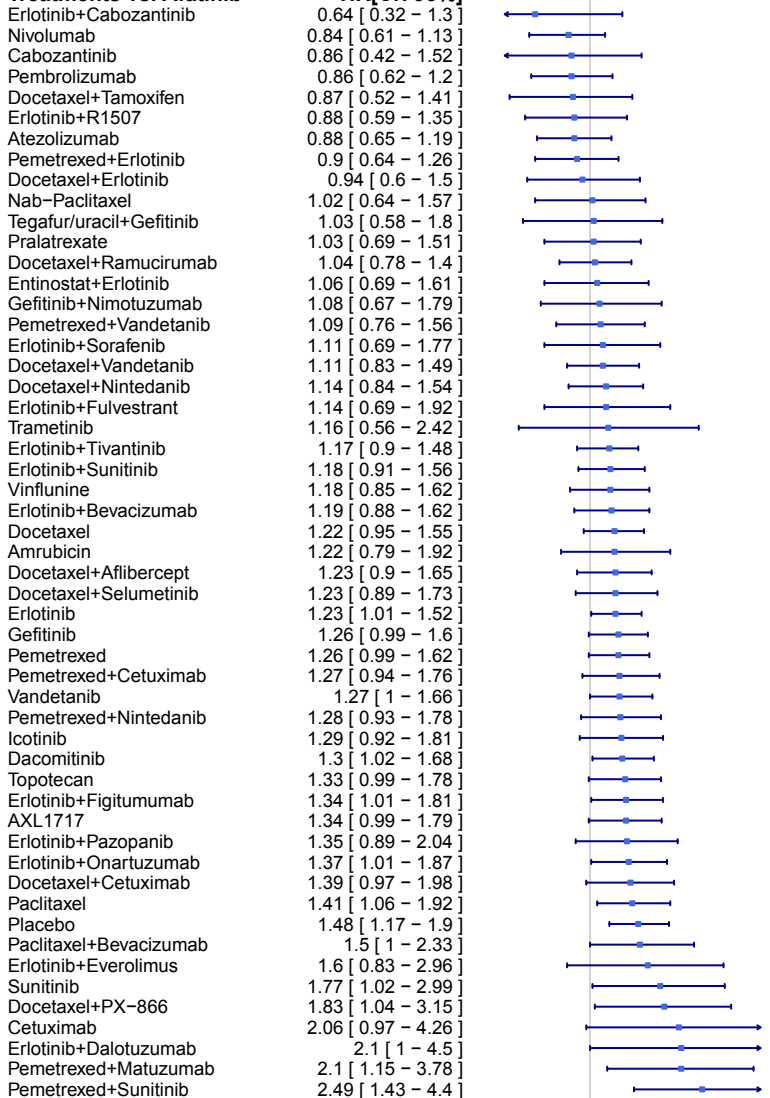

0.50 0.71 1.0 1.41 4.0

## Treatments vs. Cabozantinib

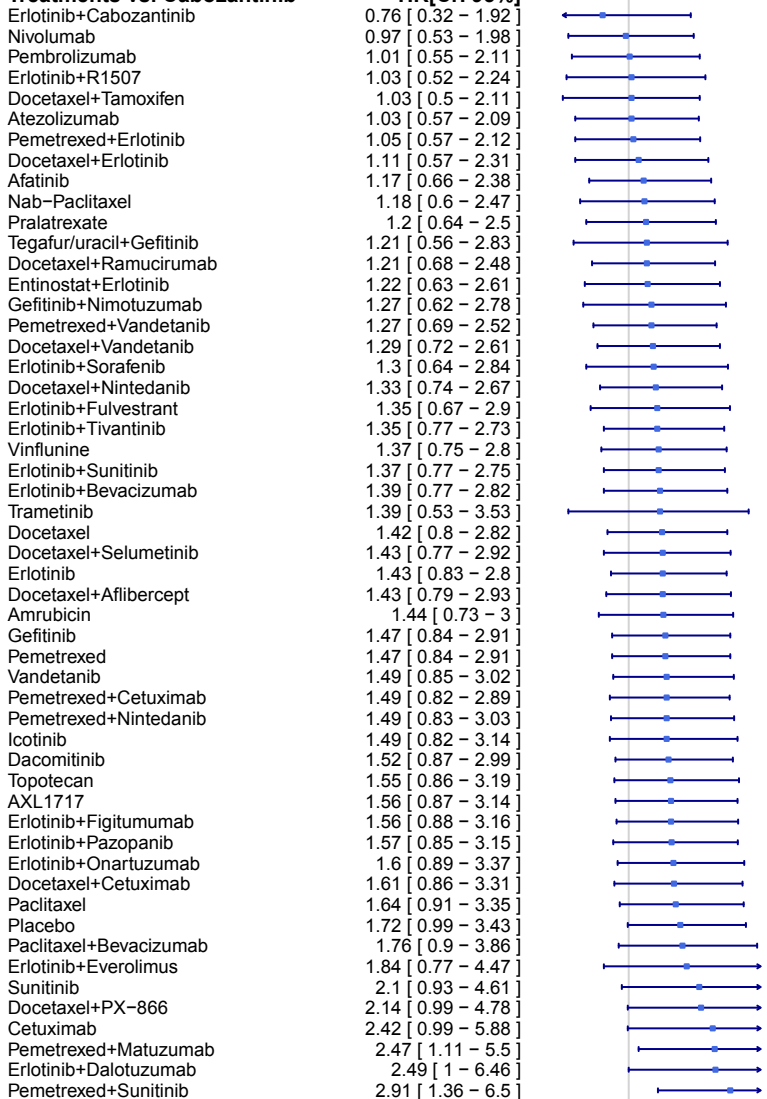

0.50 0.71 1.0 1.41 4.0

## Treatments vs. Erlotinib+Cabozantinib

| Treatment                | HR [CrI 95%]         |
|--------------------------|----------------------|
| Nivolumab                | 1.29 [ 0.64 – 2.62 ] |
| Cabozantinib             | 1.31 [ 0.52 – 3.08 ] |
| Pembrolizumab            | 1.35 [ 0.66 – 2.73 ] |
| Docetaxel+Tamoxifen      | 1.35 [ 0.55 – 3.04 ] |
| Atezolizumab             | 1.37 [ 0.69 – 2.75 ] |
| Pemetrexed+Erlotinib     | 1.38 [ 0.67 – 2.9 ]  |
| Erlotinib+R1507          | 1.38 [ 0.65 – 2.89 ] |
| Docetaxel+Erlotinib      | 1.47 [ 0.59 – 3.25 ] |
| Afatinib                 | 1.55 [ 0.77 – 3.1 ]  |
| Nab-Paclitaxel           | 1.57 [ 0.71 – 3.51 ] |
| Tegafur/uracil+Gefitinib | 1.58 [ 0.69 – 3.78 ] |
| Pralatrexate             | 1.58 [ 0.77 – 3.29 ] |
| Docetaxel+Ramucirumab    | 1.63 [ 0.81 – 3.24 ] |
| Entinostat+Erlotinib     | 1.63 [ 0.78 – 3.44 ] |
| Pemetrexed+Vandetanib    | 1.68 [ 0.82 – 3.54 ] |
| Gefitinib+Nimotuzumab    | 1.7 [ 0.71 – 3.83 ]  |
| Erlotinib+Sorafenib      | 1.72 [ 0.75 – 3.78 ] |
| Docetaxel+Vandetanib     | 1.73 [ 0.83 – 3.47 ] |
| Docetaxel+Nintedanib     | 1.77 [ 0.88 – 3.56 ] |
| Erlotinib+Fulvestrant    | 1.8 [ 0.75 – 4.1 ]   |
| Erlotinib+Tivantinib     | 1.81 [ 0.92 – 3.53 ] |
| Trametinib               | 1.82 [ 0.7 – 4.93 ]  |
| Vinflunine               | 1.82 [ 0.89 – 3.73 ] |
| Erlotinib+Sunitinib      | 1.83 [ 0.93 – 3.63 ] |
| Erlotinib+Bevacizumab    | 1.85 [ 0.91 – 3.72 ] |
| Docetaxel                | 1.9 [ 0.95 – 3.74 ]  |
| Amrubicin                | 1.91 [ 0.88 – 4.1 ]  |
| Docetaxel+Selumetinib    | 1.91 [ 0.93 – 3.99 ] |
| Docetaxel+Afiibercept    | 1.92 [ 0.93 – 3.87 ] |
| Erlotinib                | 1.93 [ 0.97 – 3.69 ] |
| Pemetrexed               | 1.96 [ 0.98 – 3.9 ]  |
| Gefitinib                | 1.96 [ 0.97 – 3.84 ] |
| Pemetrexed+Cetuximab     | 1.97 [ 0.98 – 4.02 ] |
| Vandetanib               | 1.99 [ 1 – 3.9 ]     |
| Pemetrexed+Nintedanib    | 1.99 [ 0.97 – 4.07 ] |
| Icotinib                 | 2.01 [ 0.93 – 4.04 ] |
| Dacomitinib              | 2.02 [ 1.02 – 3.97 ] |
| Erlotinib+Pazopanib      | 2.08 [ 0.97 – 4.48 ] |
| AXL1717                  | 2.08 [ 1.03 – 4.17 ] |
| Erlotinib+Figitumumab    | 2.08 [ 1.02 – 4.17 ] |
| Topotecan                | 2.09 [ 1.02 – 4.2 ]  |
| Erlotinib+Onartuzumab    | 2.14 [ 1.03 – 4.29 ] |
| Docetaxel+Cetuximab      | 2.17 [ 1.04 – 4.43 ] |
| Paclitaxel               | 2.22 [ 1.09 – 4.43 ] |
| Placebo                  | 2.32 [ 1.15 – 4.51 ] |
| Paclitaxel+Bevacizumab   | 2.35 [ 1.06 – 5.14 ] |
| Erlotinib+Everolimus     | 2.43 [ 1.04 – 5.76 ] |
| Sunitinib                | 2.74 [ 1.24 – 6.19 ] |
| Docetaxel+PX-866         | 2.79 [ 1.24 – 6.85 ] |
| Cetuximab                | 3.17 [ 1.21 – 8 ]    |
| Pemetrexed+Matuzumab     | 3.26 [ 1.32 – 8.4 ]  |
| Erlotinib+Dalotuzumab    | 3.31 [ 1.17 – 8.78 ] |
| Pemetrexed+Sunitinib     | 3.82 [ 1.7 – 9.67 ]  |

## Treatments vs. Placebo

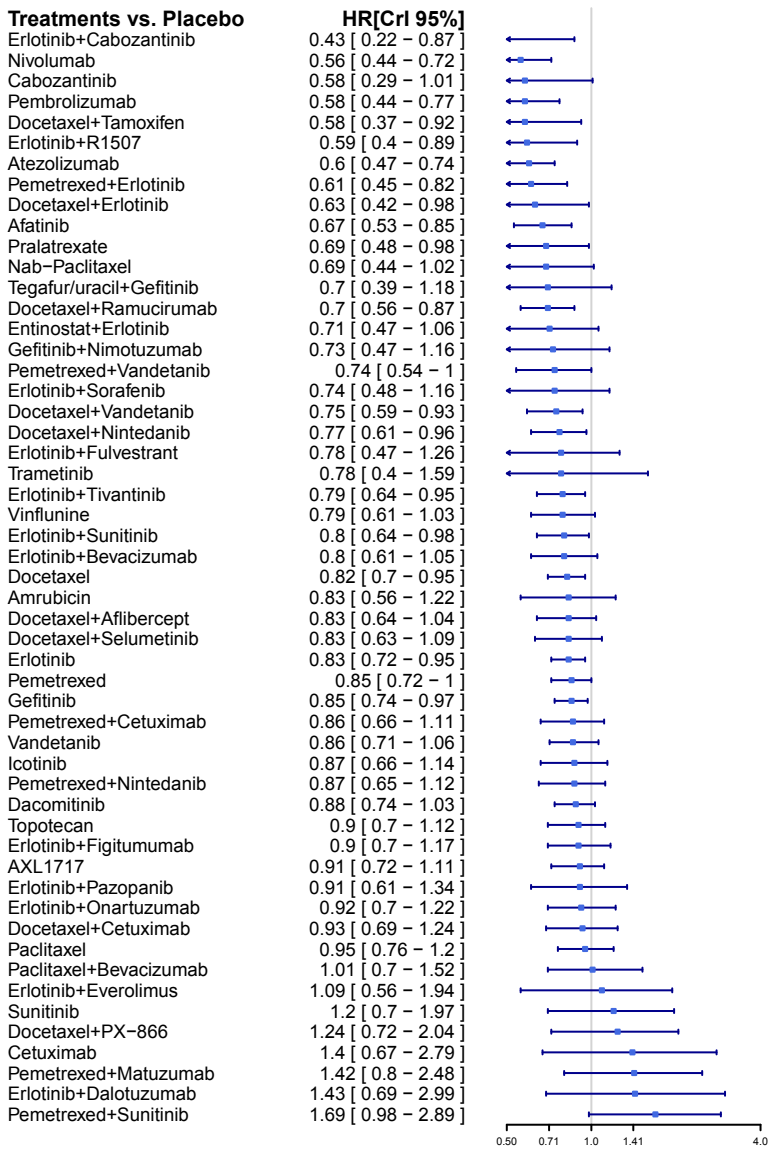

**(b) Progression free survival****Treatments vs. Docetaxel**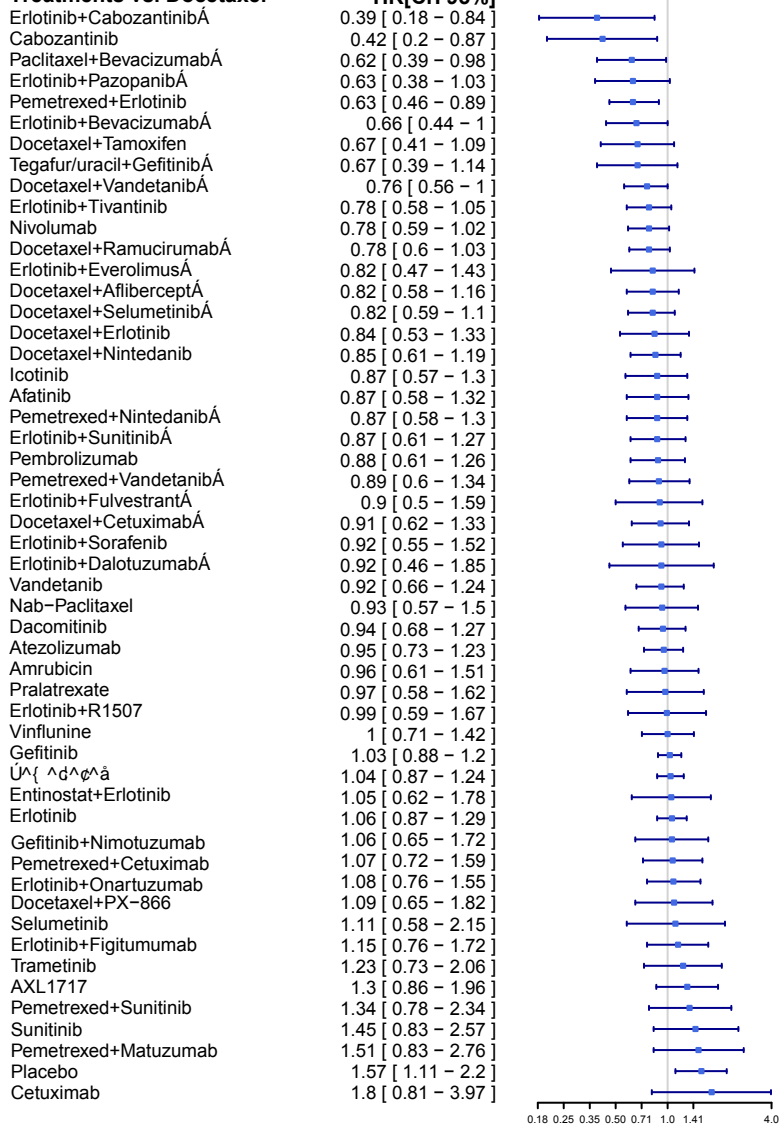



## Treatments vs. Pemetrexed

| Treatment                | HR [CrI 95%]         |
|--------------------------|----------------------|
| Erlotinib+Cabozantinib   | 0.38 [ 0.18 - 0.82 ] |
| Cabozantinib             | 0.4 [ 0.19 - 0.84 ]  |
| Paclitaxel+Bevacizumab   | 0.6 [ 0.36 - 0.98 ]  |
| Erlotinib+Pazopanib      | 0.6 [ 0.36 - 1 ]     |
| Pemetrexed+Erlotinib     | 0.61 [ 0.46 - 0.82 ] |
| Erlotinib+Bevacizumab    | 0.63 [ 0.42 - 0.97 ] |
| Docetaxel+Tamoxifen      | 0.64 [ 0.39 - 1.08 ] |
| Tegafur/uracil+Gefitinib | 0.65 [ 0.38 - 1.11 ] |
| Docetaxel+Vandetanib     | 0.73 [ 0.51 - 1.01 ] |
| Erlotinib+Tivantinib     | 0.75 [ 0.55 - 1.03 ] |
| Nivolumab                | 0.75 [ 0.54 - 1.03 ] |
| Docetaxel+Ramucirumab    | 0.75 [ 0.55 - 1.04 ] |
| Erlotinib+Everolimus     | 0.79 [ 0.45 - 1.38 ] |
| Docetaxel+Aflibercept    | 0.79 [ 0.54 - 1.16 ] |
| Docetaxel+Selumetinib    | 0.79 [ 0.55 - 1.1 ]  |
| Docetaxel+Erlotinib      | 0.81 [ 0.51 - 1.29 ] |
| Docetaxel+Nintedanib     | 0.82 [ 0.56 - 1.2 ]  |
| Icotinib                 | 0.83 [ 0.54 - 1.27 ] |
| Afatinib                 | 0.84 [ 0.55 - 1.28 ] |
| Pemetrexed+Nintedanib    | 0.84 [ 0.58 - 1.21 ] |
| Erlotinib+Sunitinib      | 0.84 [ 0.58 - 1.23 ] |
| Pembrolizumab            | 0.85 [ 0.57 - 1.26 ] |
| Pemetrexed+Vandetanib    | 0.86 [ 0.6 - 1.24 ]  |
| Erlotinib+Fulvestrant    | 0.87 [ 0.48 - 1.55 ] |
| Docetaxel+Cetuximab      | 0.88 [ 0.58 - 1.33 ] |
| Erlotinib+Sorafenib      | 0.88 [ 0.52 - 1.48 ] |
| Erlotinib+Dalotuzumab    | 0.88 [ 0.44 - 1.79 ] |
| Vandetanib               | 0.89 [ 0.63 - 1.21 ] |
| Nab-Paclitaxel           | 0.89 [ 0.57 - 1.39 ] |
| Dacomitinib              | 0.9 [ 0.65 - 1.23 ]  |
| Atezolizumab             | 0.91 [ 0.66 - 1.25 ] |
| Amrubicin                | 0.93 [ 0.57 - 1.5 ]  |
| Pralatrexate             | 0.93 [ 0.55 - 1.57 ] |
| Erlotinib+R1507          | 0.95 [ 0.56 - 1.62 ] |
| Docetaxel                | 0.96 [ 0.81 - 1.14 ] |
| Vinflunine               | 0.96 [ 0.66 - 1.42 ] |
| Gefitinib                | 0.99 [ 0.83 - 1.18 ] |
| Entinostat+Erlotinib     | 1.01 [ 0.6 - 1.72 ]  |
| Erlotinib                | 1.02 [ 0.83 - 1.27 ] |
| Gefitinib+Nimotuzumab    | 1.03 [ 0.62 - 1.67 ] |
| Pemetrexed+Cetuximab     | 1.03 [ 0.72 - 1.47 ] |
| Erlotinib+Onartuzumab    | 1.04 [ 0.73 - 1.51 ] |
| Docetaxel+PX-866         | 1.05 [ 0.61 - 1.8 ]  |
| Selumetinib              | 1.08 [ 0.57 - 2.02 ] |
| Erlotinib+Figitumumab    | 1.11 [ 0.73 - 1.68 ] |
| Trametinib               | 1.18 [ 0.69 - 2.03 ] |
| AXL1717                  | 1.25 [ 0.8 - 1.95 ]  |
| Pemetrexed+Sunitinib     | 1.3 [ 0.77 - 2.19 ]  |
| Sunitinib                | 1.4 [ 0.82 - 2.42 ]  |
| Pemetrexed+Matuzumab     | 1.45 [ 0.82 - 2.6 ]  |
| Placebo                  | 1.51 [ 1.06 - 2.15 ] |
| Cetuximab                | 1.73 [ 0.8 - 3.75 ]  |

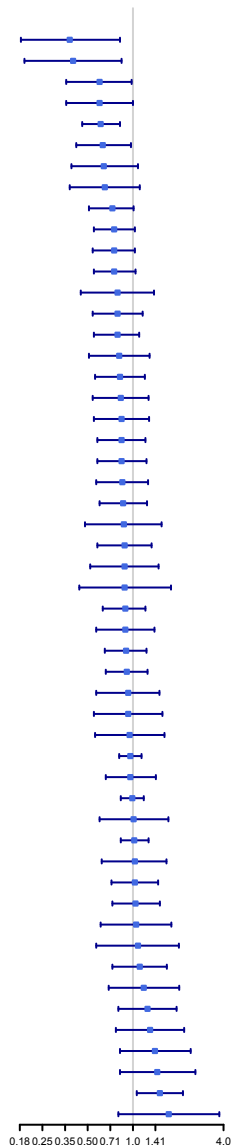

## Treatments vs. Erlotinib

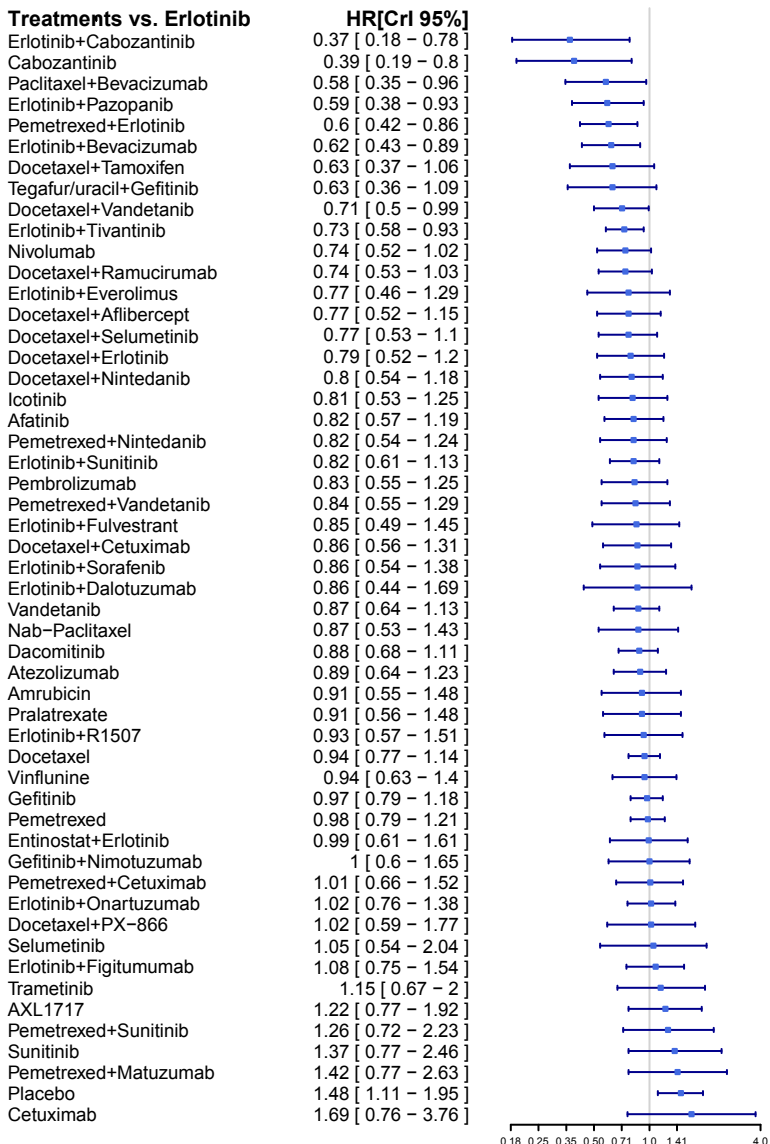

## Treatments vs. Gefitinib

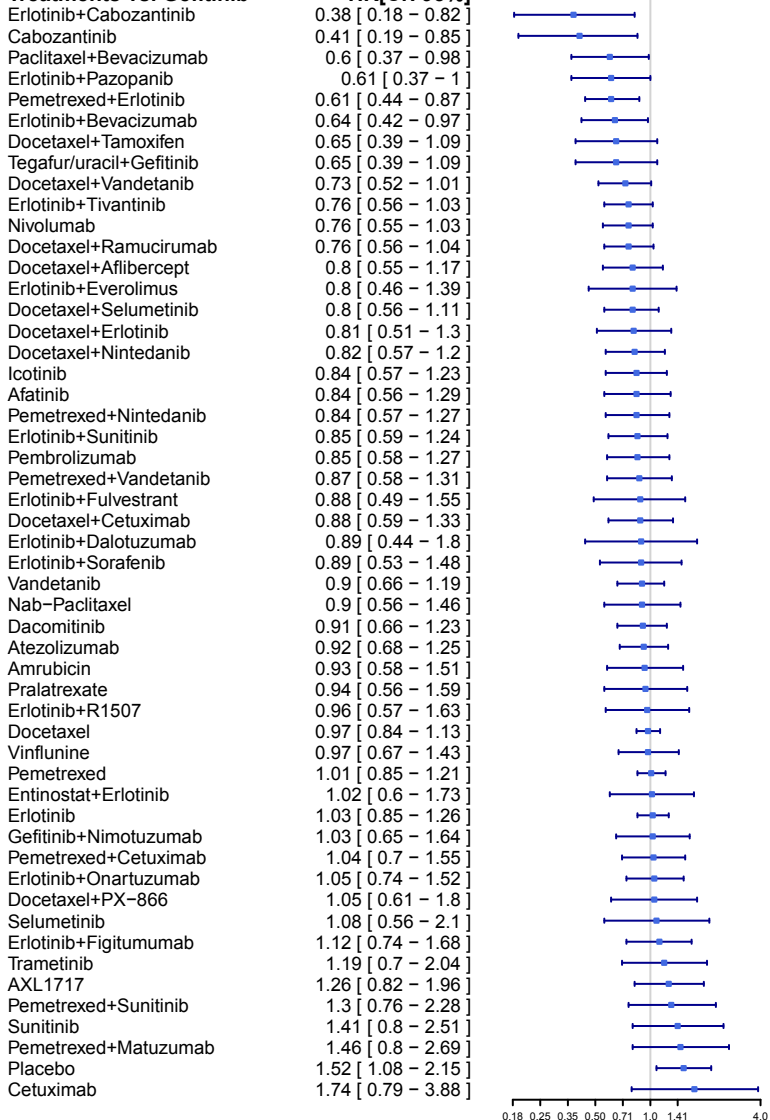

## Treatments vs. Nivolumab

| Treatment                | HR [CrI 95%]         |
|--------------------------|----------------------|
| Erlotinib+Cabozantinib   | 0.5 [ 0.22 - 1.13 ]  |
| Cabozantinib             | 0.54 [ 0.24 - 1.17 ] |
| Paclitaxel+Bevacizumab   | 0.79 [ 0.47 - 1.36 ] |
| Erlotinib+Pazopanib      | 0.8 [ 0.46 - 1.42 ]  |
| Pemetrexed+Erlotinib     | 0.81 [ 0.53 - 1.26 ] |
| Erlotinib+Bevacizumab    | 0.84 [ 0.52 - 1.4 ]  |
| Docetaxel+Tamoxifen      | 0.85 [ 0.49 - 1.51 ] |
| Tegafur/uracil+Gefitinib | 0.86 [ 0.47 - 1.57 ] |
| Docetaxel+Vandetanib     | 0.97 [ 0.65 - 1.43 ] |
| Erlotinib+Tivantinib     | 1 [ 0.67 - 1.52 ]    |
| Docetaxel+Ramucirumab    | 1 [ 0.69 - 1.49 ]    |
| Docetaxel+Aflibercept    | 1.05 [ 0.69 - 1.64 ] |
| Erlotinib+Everolimus     | 1.05 [ 0.57 - 1.96 ] |
| Docetaxel+Selumetinib    | 1.05 [ 0.69 - 1.57 ] |
| Docetaxel+Erlotinib      | 1.08 [ 0.63 - 1.85 ] |
| Docetaxel+Nintedanib     | 1.09 [ 0.71 - 1.7 ]  |
| Icotinib                 | 1.11 [ 0.68 - 1.83 ] |
| Afatinib                 | 1.11 [ 0.68 - 1.85 ] |
| Pemetrexed+Nintedanib    | 1.11 [ 0.7 - 1.83 ]  |
| Erlotinib+Sunitinib      | 1.12 [ 0.72 - 1.79 ] |
| Pembrolizumab            | 1.13 [ 0.72 - 1.79 ] |
| Pemetrexed+Vandetanib    | 1.14 [ 0.71 - 1.88 ] |
| Erlotinib+Fulvestrant    | 1.16 [ 0.61 - 2.19 ] |
| Docetaxel+Cetuximab      | 1.17 [ 0.74 - 1.87 ] |
| Erlotinib+Sorafenib      | 1.17 [ 0.66 - 2.1 ]  |
| Erlotinib+Dalotuzumab    | 1.18 [ 0.56 - 2.51 ] |
| Vandetanib               | 1.18 [ 0.78 - 1.77 ] |
| Nab-Paclitaxel           | 1.18 [ 0.69 - 2.08 ] |
| Dacomitinib              | 1.2 [ 0.79 - 1.81 ]  |
| Atezolizumab             | 1.21 [ 0.83 - 1.79 ] |
| Amrubicin                | 1.23 [ 0.72 - 2.1 ]  |
| Pralatrexate             | 1.24 [ 0.7 - 2.24 ]  |
| Erlotinib+R1507          | 1.27 [ 0.71 - 2.31 ] |
| Vinflunine               | 1.28 [ 0.83 - 2.02 ] |
| Docetaxel                | 1.28 [ 0.98 - 1.7 ]  |
| Gefitinib                | 1.32 [ 0.97 - 1.81 ] |
| Pemetrexed               | 1.33 [ 0.97 - 1.85 ] |
| Entinostat+Erlotinib     | 1.35 [ 0.75 - 2.44 ] |
| Erlotinib                | 1.36 [ 0.98 - 1.92 ] |
| Gefitinib+Nimotuzumab    | 1.36 [ 0.78 - 2.38 ] |
| Pemetrexed+Cetuximab     | 1.37 [ 0.86 - 2.23 ] |
| Erlotinib+Onartuzumab    | 1.39 [ 0.9 - 2.2 ]   |
| Docetaxel+PX-866         | 1.39 [ 0.78 - 2.51 ] |
| Selumetinib              | 1.43 [ 0.71 - 2.92 ] |
| Erlotinib+Figitumumab    | 1.47 [ 0.91 - 2.43 ] |
| Trametinib               | 1.57 [ 0.88 - 2.83 ] |
| AXL1717                  | 1.66 [ 1.02 - 2.74 ] |
| Pemetrexed+Sunitinib     | 1.72 [ 0.94 - 3.21 ] |
| Sunitinib                | 1.86 [ 1 - 3.51 ]    |
| Pemetrexed+Matuzumab     | 1.93 [ 1 - 3.77 ]    |
| Placebo                  | 2.01 [ 1.3 - 3.13 ]  |
| Cetuximab                | 2.3 [ 1 - 5.34 ]     |

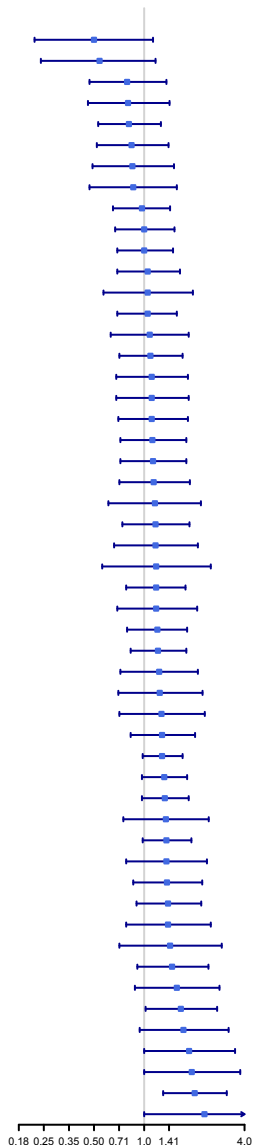

**Treatments vs. Pembrolizumab**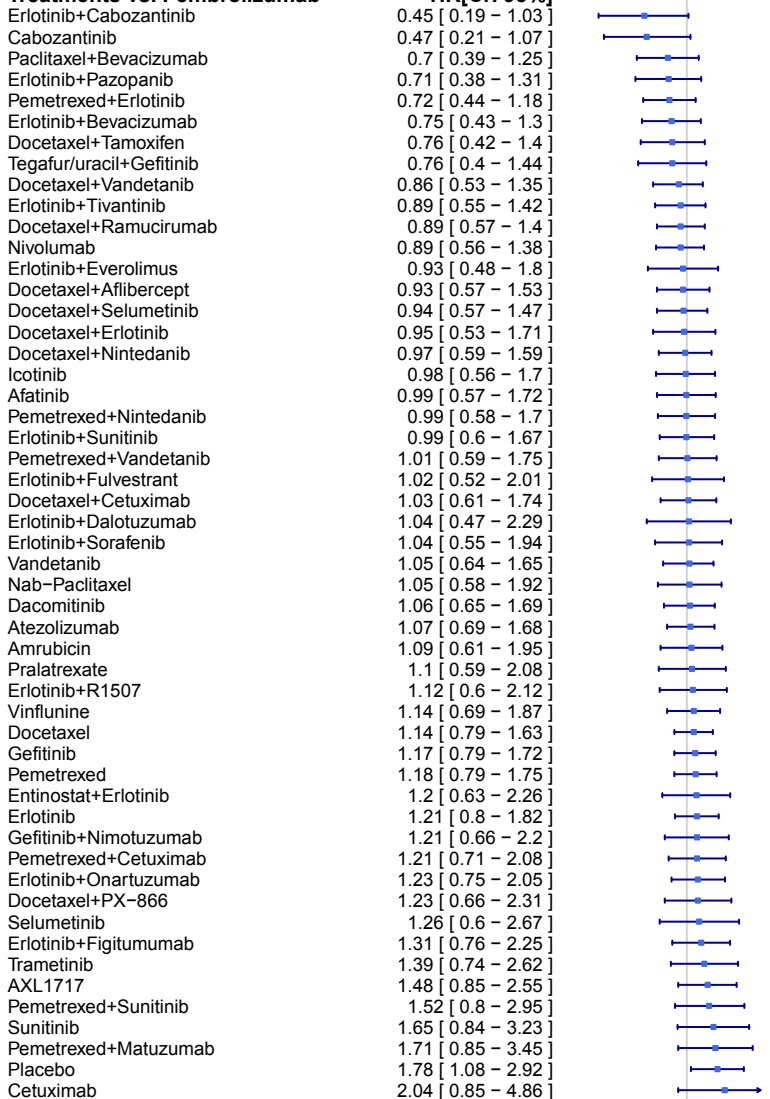

0.18 0.35 0.71 1.01 1.41 4.0

## Treatments vs. Atezolizumab

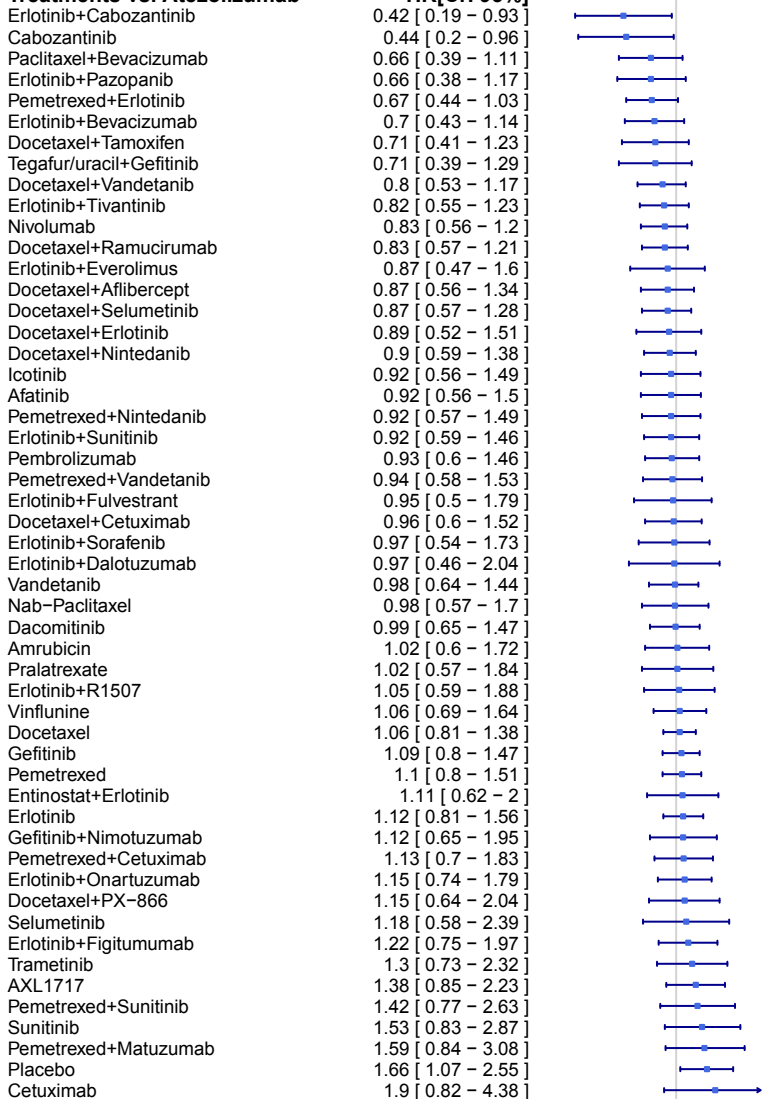

**Treatments vs. Docetaxel+Nintedanib**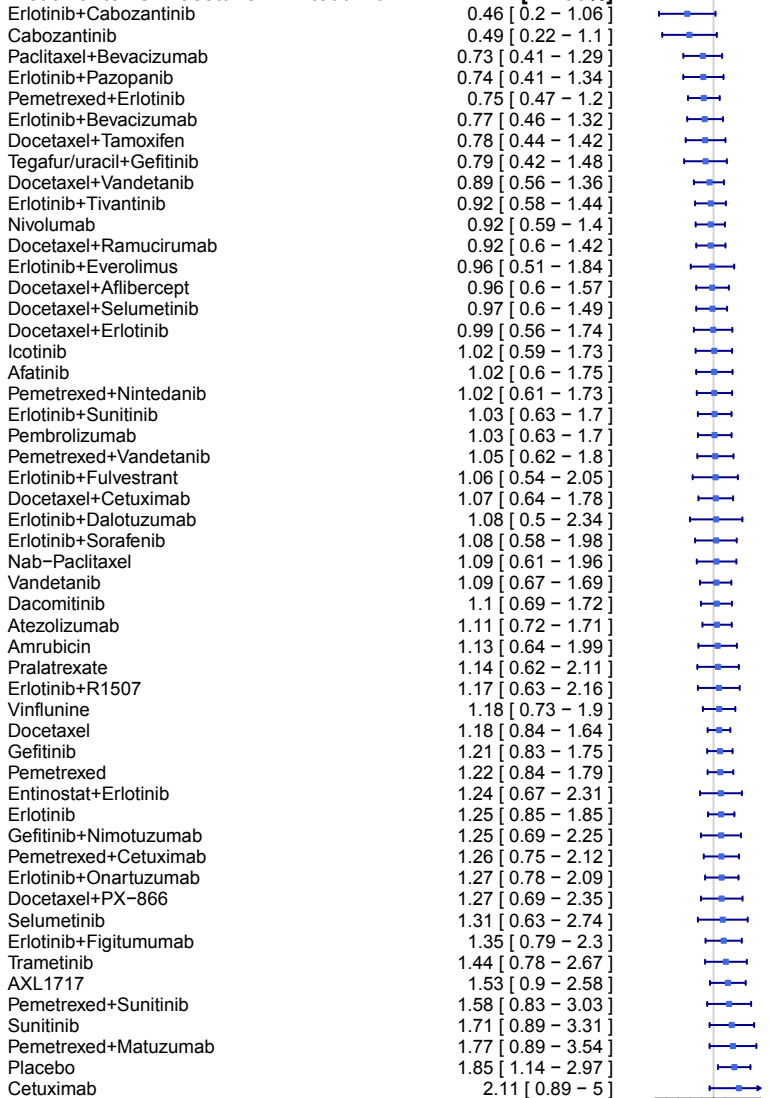

**Treatments vs. Docetaxel+Ramucirumab**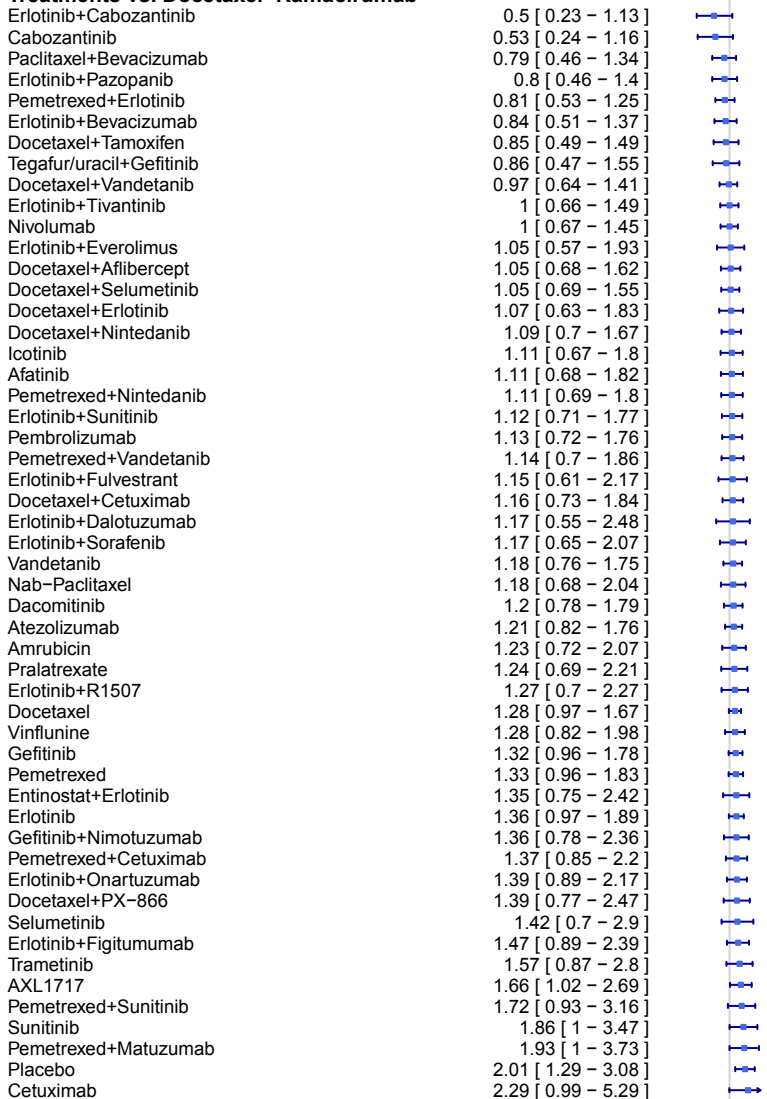



## Treatments vs. Afatinib

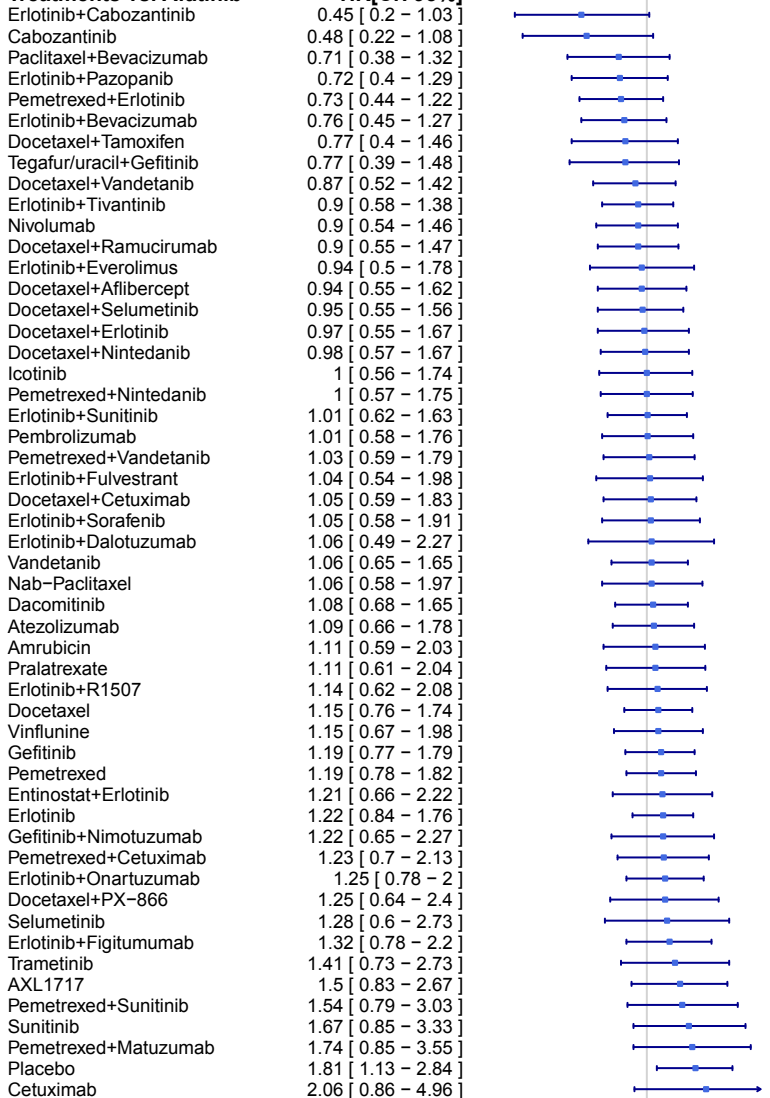

## Treatments vs. Cabozantinib

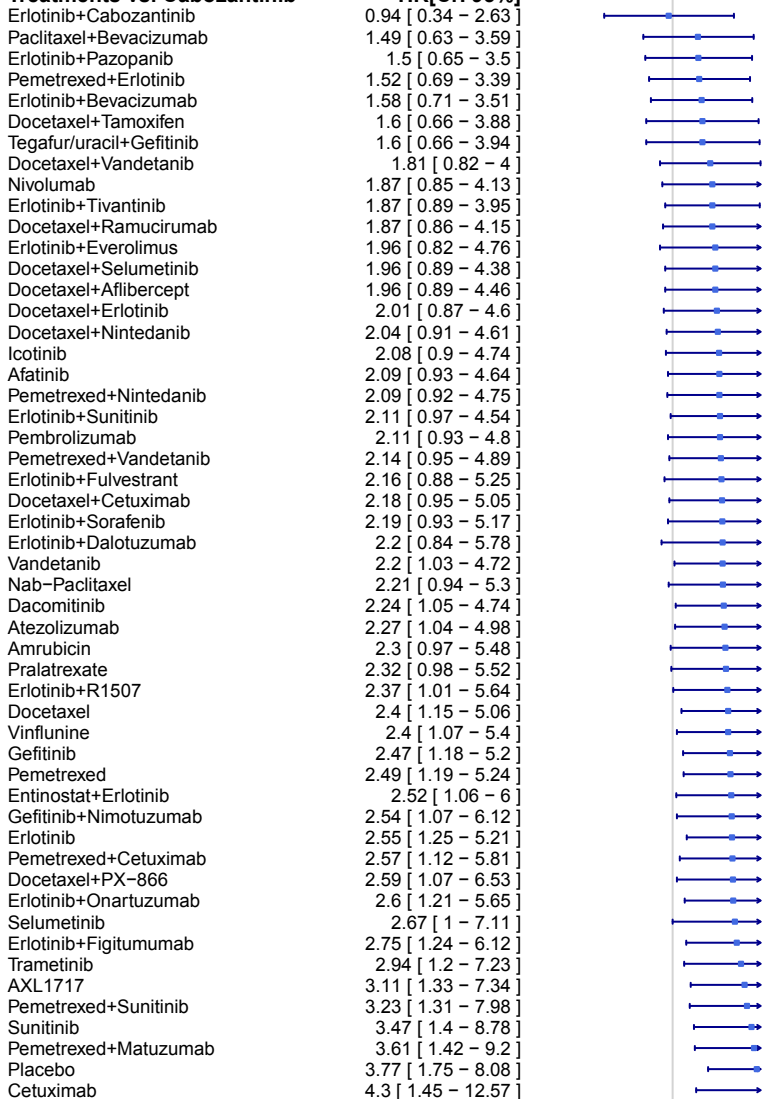

**Treatments vs. Erlotinib+Cabozantinib**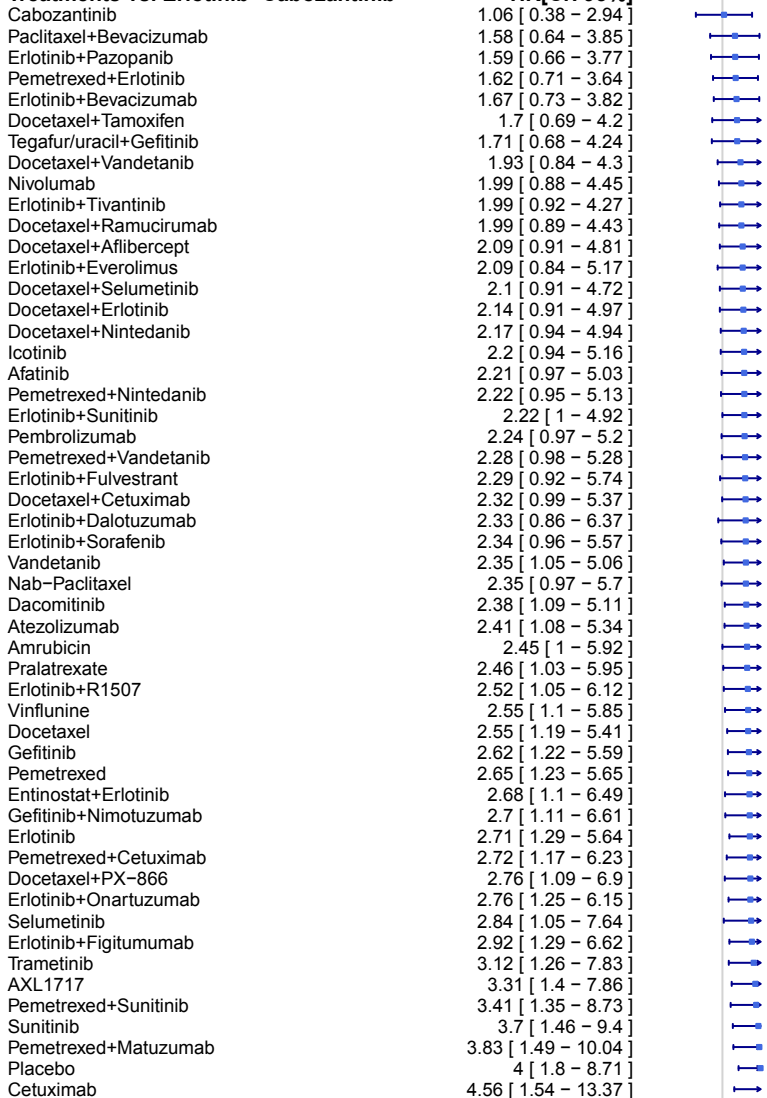

0.18 0.501.0 4.0

**Treatments vs. Placebo**

|                          | <b>HR[CrI 95%]</b>   |
|--------------------------|----------------------|
| Erlotinib+Cabozantinib   | 0.25 [ 0.11 - 0.56 ] |
| Cabozantinib             | 0.27 [ 0.12 - 0.57 ] |
| Paclitaxel+Bevacizumab   | 0.39 [ 0.22 - 0.7 ]  |
| Erlotinib+Pazopanib      | 0.4 [ 0.23 - 0.69 ]  |
| Pemetrexed+Erlotinib     | 0.4 [ 0.26 - 0.64 ]  |
| Erlotinib+Bevacizumab    | 0.42 [ 0.27 - 0.67 ] |
| Docetaxel+Tamoxifen      | 0.42 [ 0.24 - 0.77 ] |
| Tegafur/uracil+Gefitinib | 0.43 [ 0.23 - 0.79 ] |
| Docetaxel+Vandetanib     | 0.48 [ 0.31 - 0.75 ] |
| Erlotinib+Tivantinib     | 0.5 [ 0.35 - 0.72 ]  |
| Nivolumab                | 0.5 [ 0.32 - 0.77 ]  |
| Docetaxel+Ramucirumab    | 0.5 [ 0.32 - 0.78 ]  |
| Erlotinib+Everolimus     | 0.52 [ 0.29 - 0.95 ] |
| Docetaxel+Aflibercept    | 0.52 [ 0.32 - 0.85 ] |
| Docetaxel+Selumetinib    | 0.52 [ 0.33 - 0.82 ] |
| Docetaxel+Erlotinib      | 0.53 [ 0.32 - 0.88 ] |
| Docetaxel+Nintedanib     | 0.54 [ 0.34 - 0.88 ] |
| Icotinib                 | 0.55 [ 0.33 - 0.93 ] |
| Afatinib                 | 0.55 [ 0.35 - 0.89 ] |
| Pemetrexed+Nintedanib    | 0.55 [ 0.34 - 0.92 ] |
| Erlotinib+Sunitinib      | 0.56 [ 0.37 - 0.86 ] |
| Pembrolizumab            | 0.56 [ 0.34 - 0.93 ] |
| Pemetrexed+Vandetanib    | 0.57 [ 0.34 - 0.95 ] |
| Erlotinib+Fulvestrant    | 0.57 [ 0.31 - 1.05 ] |
| Docetaxel+Cetuximab      | 0.58 [ 0.35 - 0.97 ] |
| Erlotinib+Sorafenib      | 0.58 [ 0.34 - 1.01 ] |
| Erlotinib+Dalotuzumab    | 0.59 [ 0.28 - 1.21 ] |
| Vandetanib               | 0.59 [ 0.39 - 0.86 ] |
| Nab-Paclitaxel           | 0.59 [ 0.33 - 1.04 ] |
| Dacomitinib              | 0.6 [ 0.44 - 0.79 ]  |
| Atezolizumab             | 0.6 [ 0.39 - 0.93 ]  |
| Amrubicin                | 0.61 [ 0.35 - 1.08 ] |
| Pralatrexate             | 0.62 [ 0.35 - 1.08 ] |
| Erlotinib+R1507          | 0.63 [ 0.36 - 1.11 ] |
| Docetaxel                | 0.64 [ 0.45 - 0.9 ]  |
| Vinflunine               | 0.64 [ 0.39 - 1.04 ] |
| Gefitinib                | 0.66 [ 0.46 - 0.93 ] |
| Pemetrexed               | 0.66 [ 0.47 - 0.95 ] |
| Entinostat+Erlotinib     | 0.67 [ 0.38 - 1.18 ] |
| Erlotinib                | 0.68 [ 0.51 - 0.9 ]  |
| Gefitinib+Nimotuzumab    | 0.68 [ 0.38 - 1.21 ] |
| Pemetrexed+Cetuximab     | 0.68 [ 0.42 - 1.13 ] |
| Docetaxel+PX-866         | 0.69 [ 0.37 - 1.28 ] |
| Erlotinib+Onartuzumab    | 0.69 [ 0.46 - 1.05 ] |
| Selumetinib              | 0.71 [ 0.35 - 1.46 ] |
| Erlotinib+Figitumumab    | 0.73 [ 0.46 - 1.16 ] |
| Trametinib               | 0.78 [ 0.42 - 1.45 ] |
| AXL1717                  | 0.83 [ 0.49 - 1.42 ] |
| Pemetrexed+Sunitinib     | 0.86 [ 0.46 - 1.61 ] |
| Sunitinib                | 0.92 [ 0.49 - 1.77 ] |
| Pemetrexed+Matuzumab     | 0.96 [ 0.49 - 1.89 ] |
| Cetuximab                | 1.14 [ 0.49 - 2.69 ] |

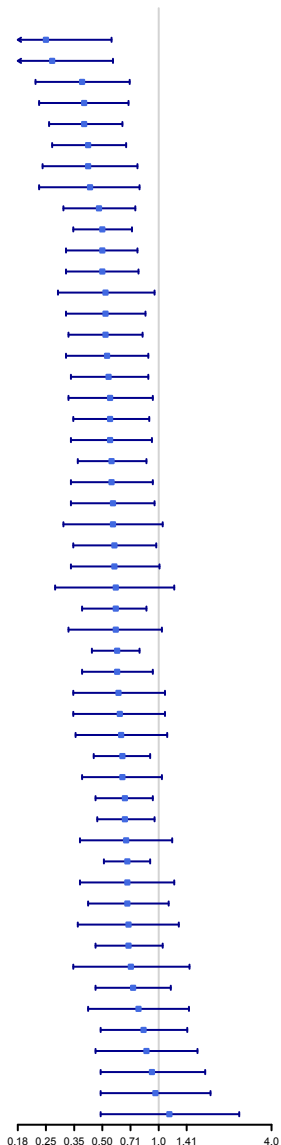

### (c) Objective response

#### Treatments vs. Docetaxel

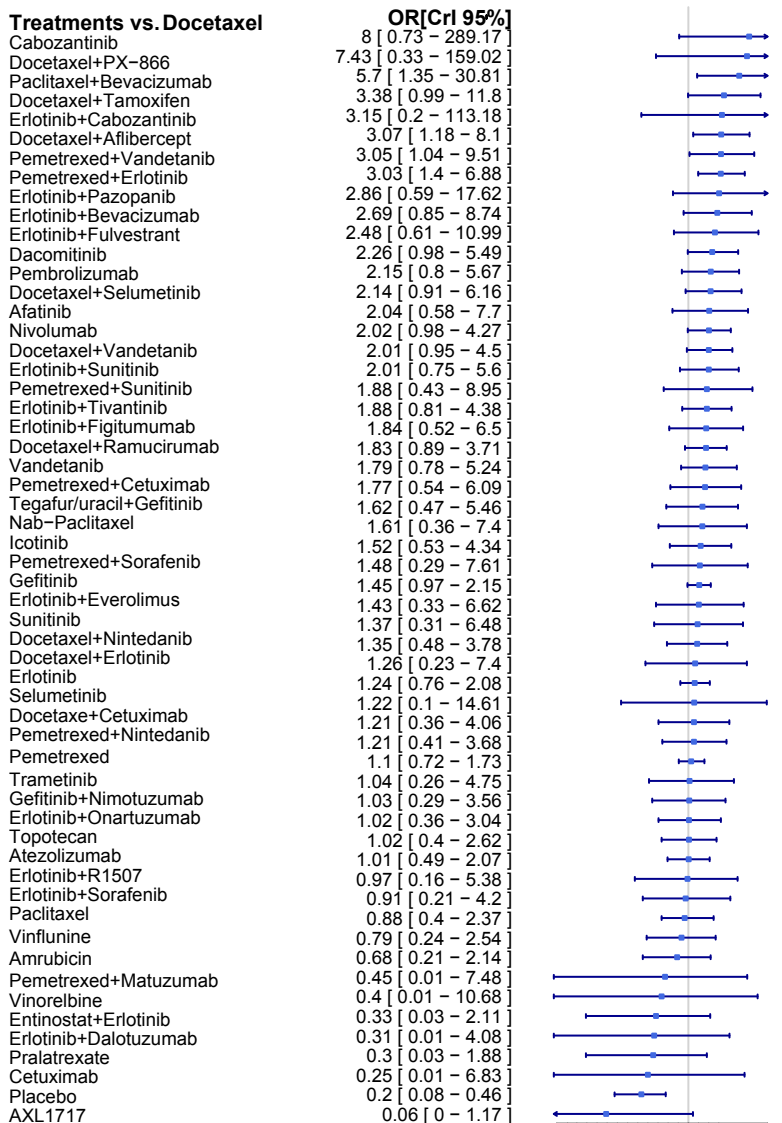

## Treatments vs. Pemetrexed

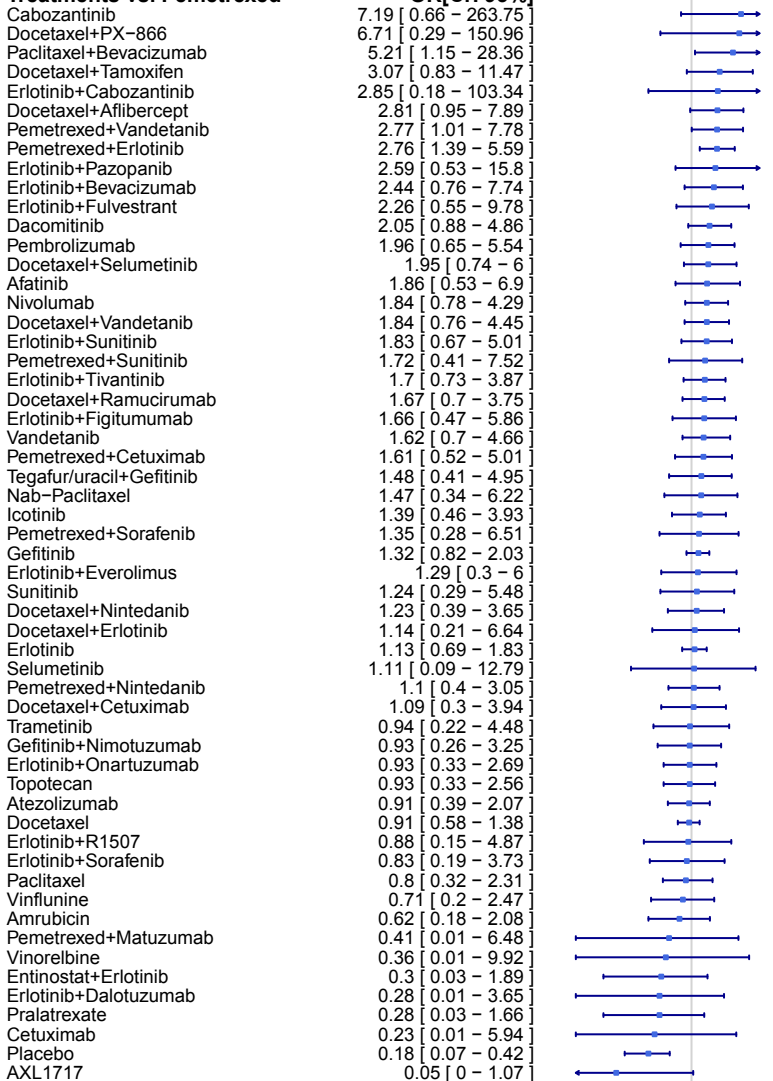

0.011 0.044 0.177 0.707 2.830 15.00

## Treatments vs. Erlotinib

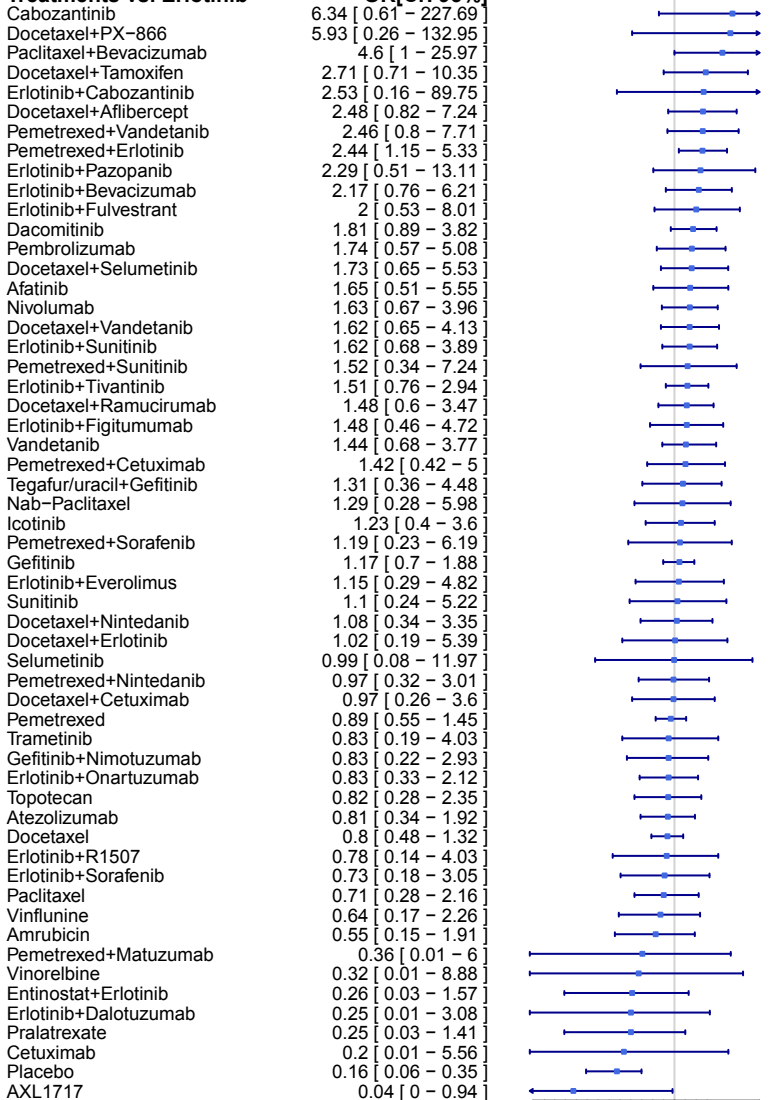

0.011 0.031 0.088 0.250 0.707 2.00 15.00

## Treatments vs. Gefitinib

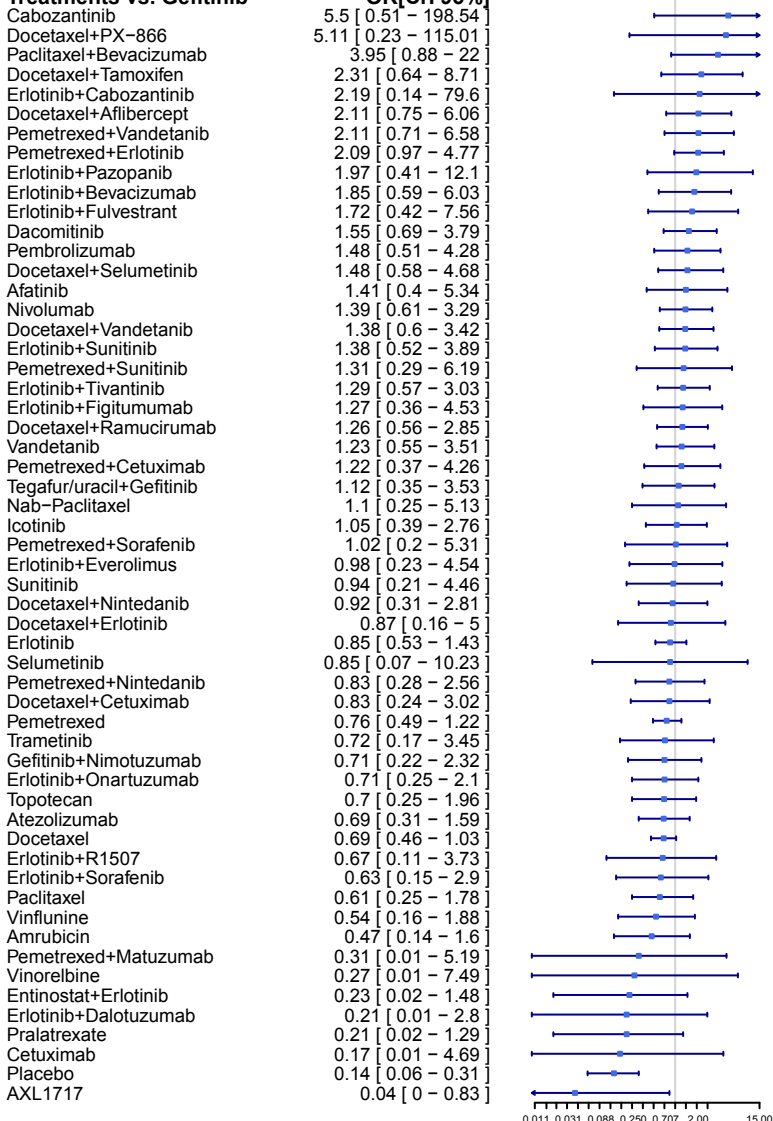

0.011 0.031 0.088 0.250 0.707 2.00 15.00



## Treatments vs. Nivolumab

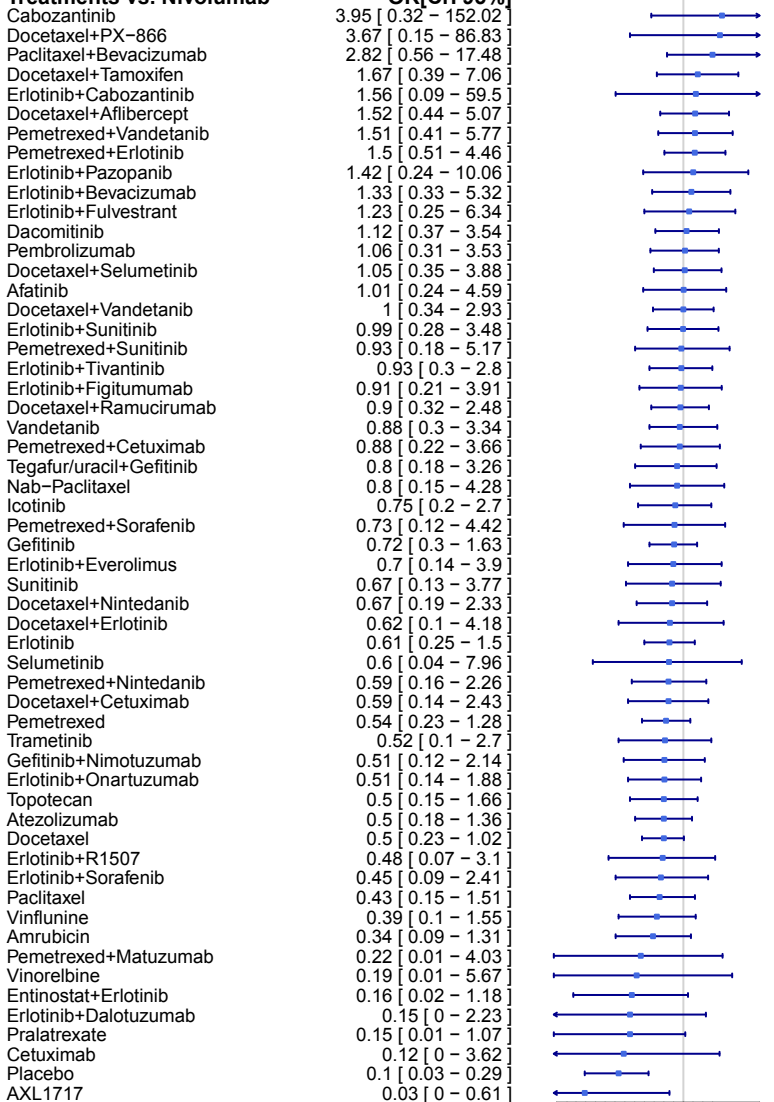

0.011 0.044 0.177 0.707 2.00 15.00

## Treatments vs. Pembrolizumab

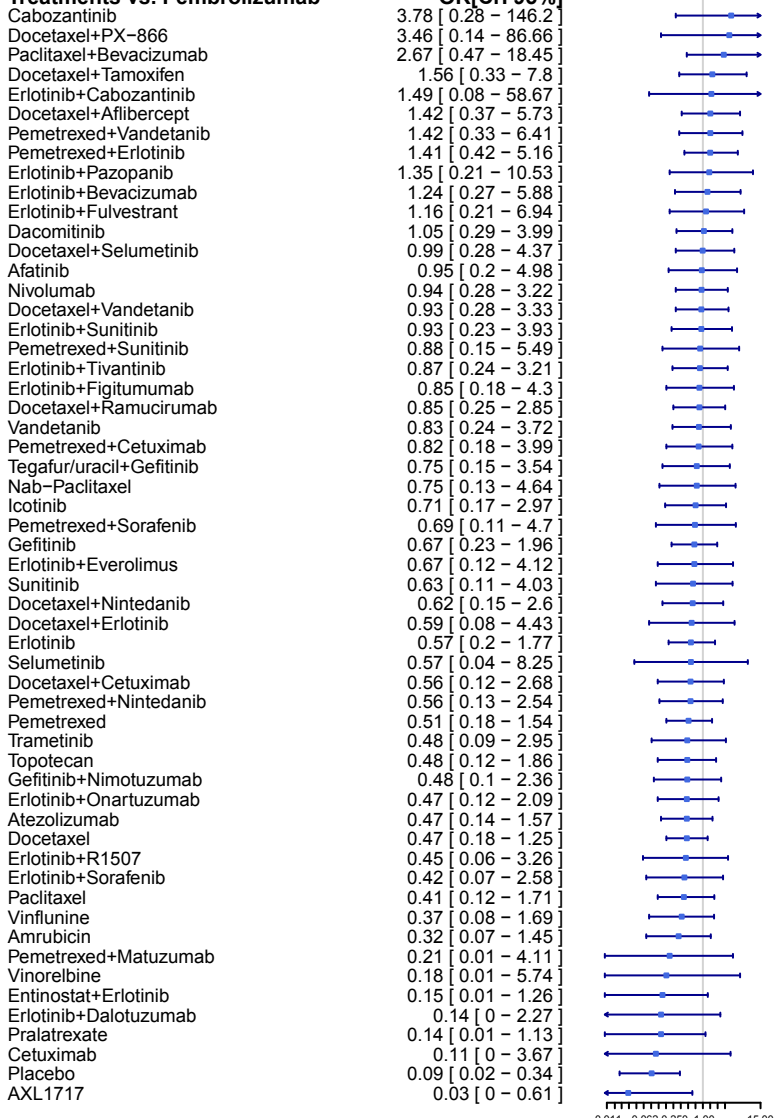

## Treatments vs. Atezolizumab

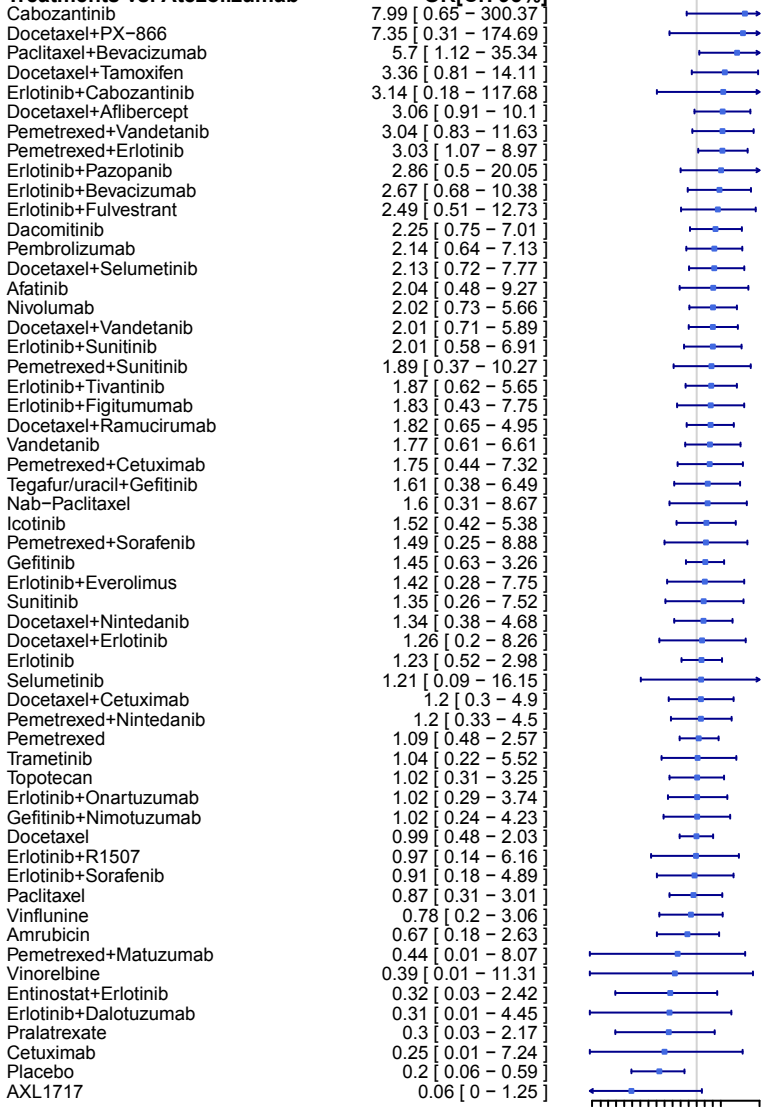

0.011 0.044 0.177 0.707 2.830 15.00

## Treatments vs. Docetaxel+Nintedanib

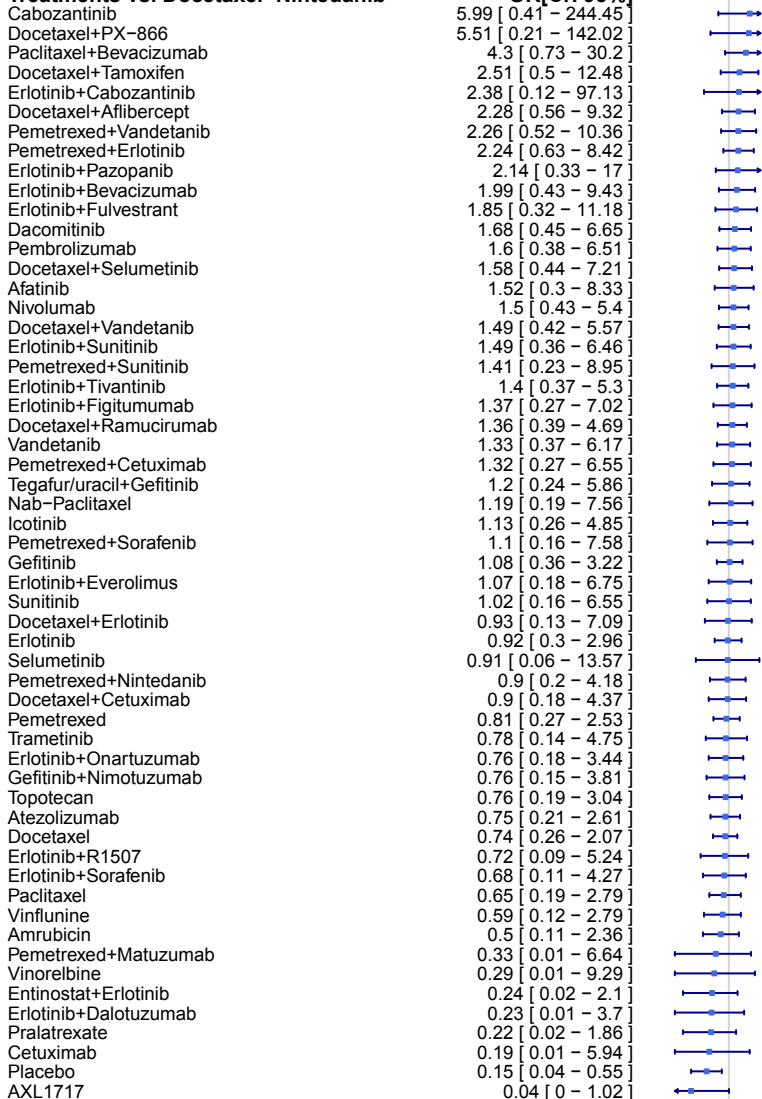

## Treatments vs. Docetaxel+Ramucirumab

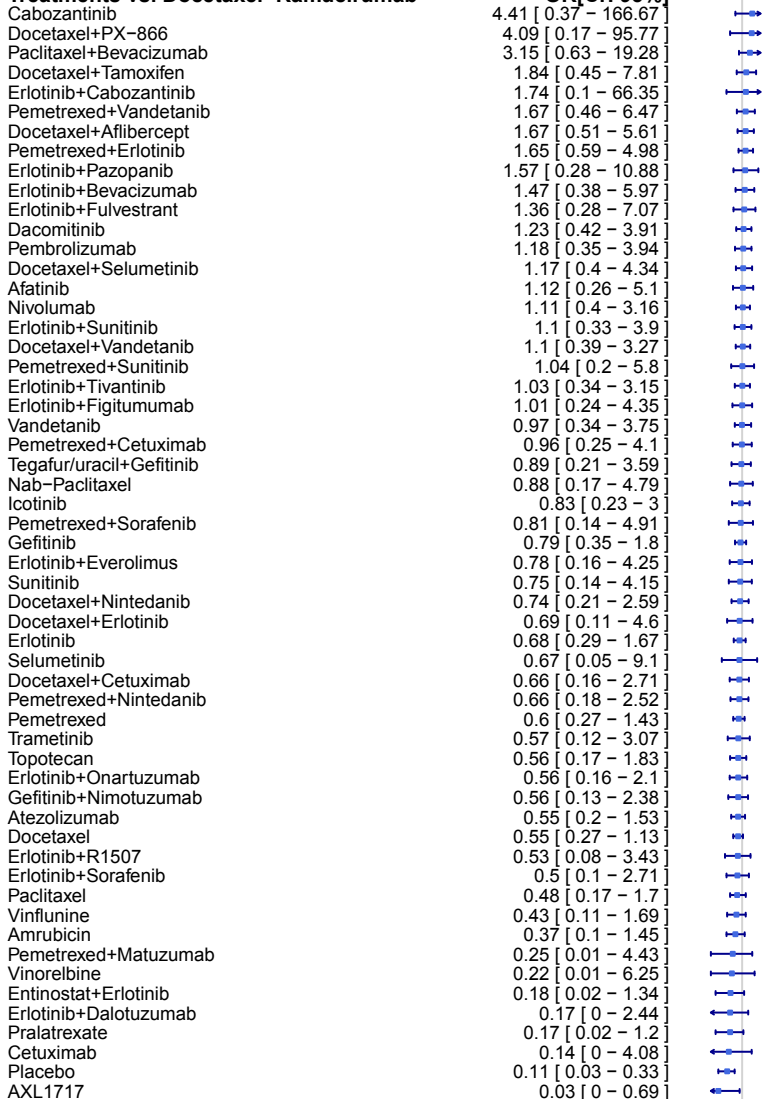

## Treatments vs. Afatinib

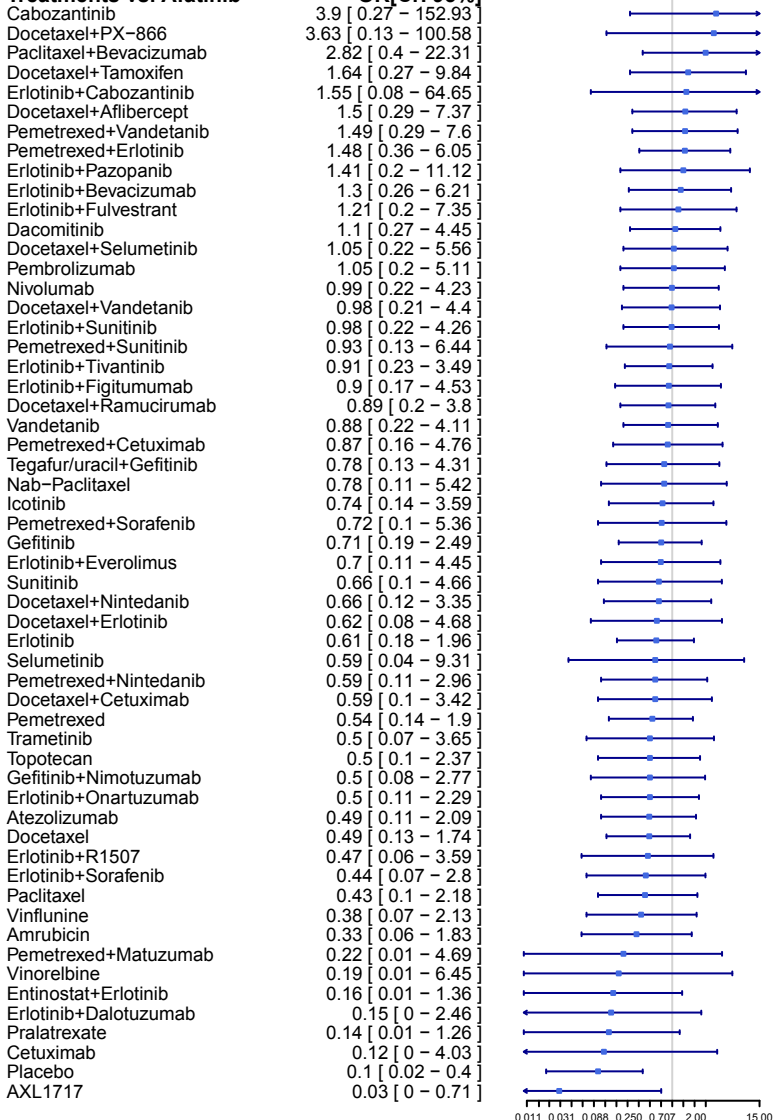

## Treatments vs. Cabozantinib

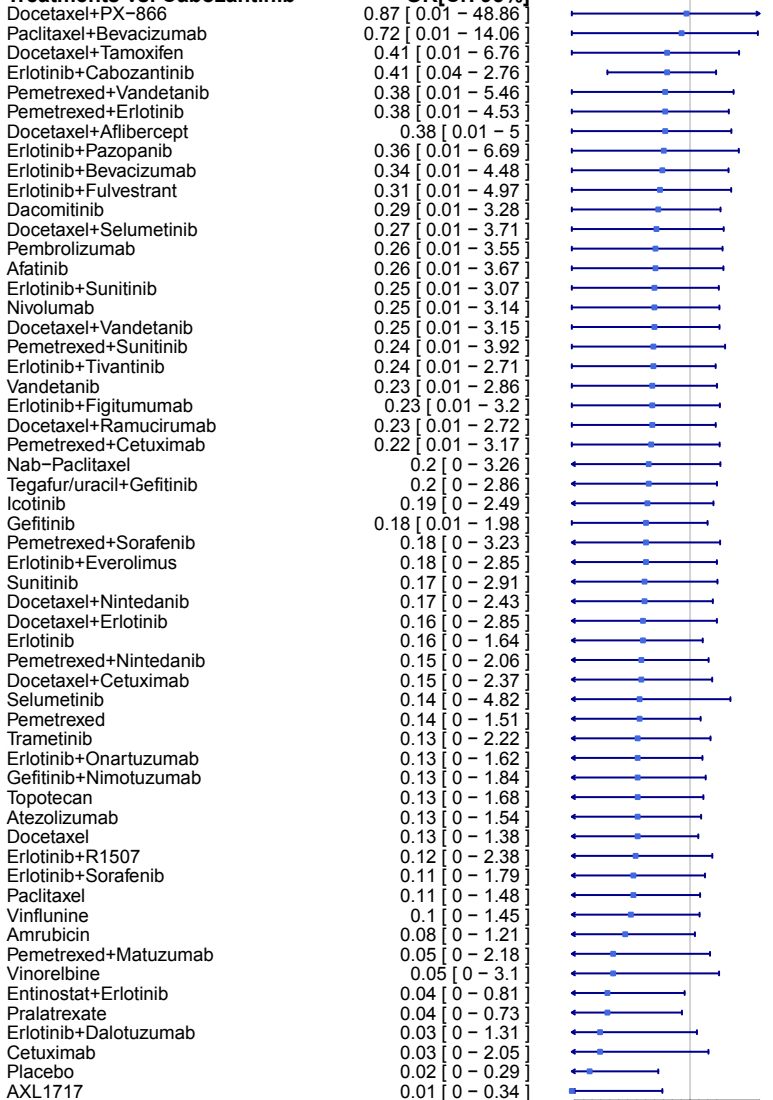

0.011 0.044 0.177 0.707 2.830 15.00

## Treatments vs. Erlotinib+Cabozantinib

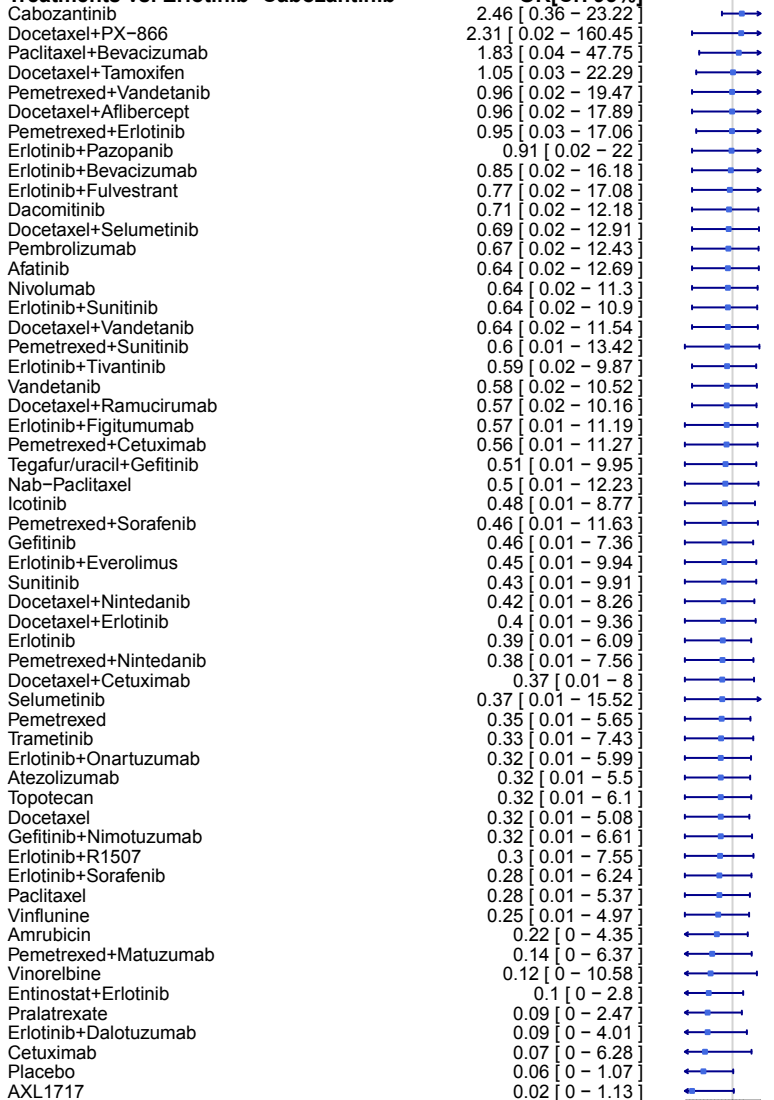



## Treatments vs. Placebo

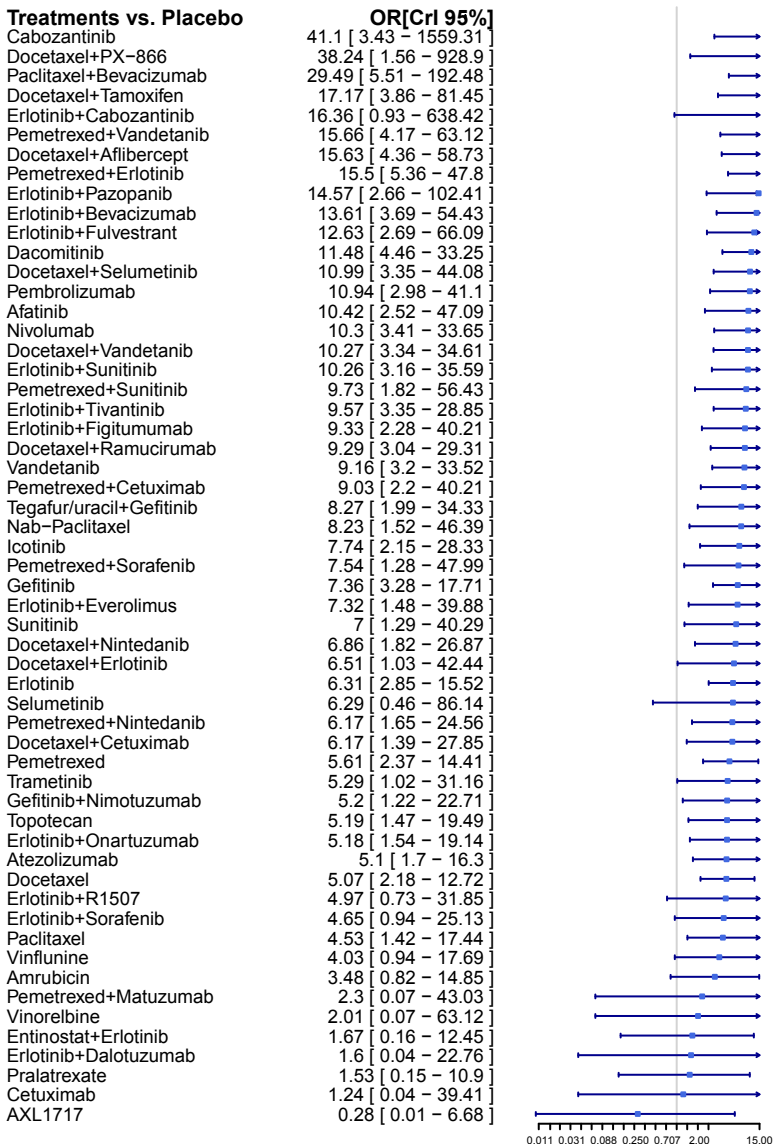

**(d) Serious adverse events****Treatments vs. Docetaxel****OR[CrI 95%]**

|                        |                       |  |
|------------------------|-----------------------|--|
| Selumetinib            | 0.13 [ 0 - 1.42 ]     |  |
| Docetaxel+Erlotinib    | 0.24 [ 0.06 - 0.93 ]  |  |
| Erlotinib+Dalotuzumab  | 0.35 [ 0.08 - 1.32 ]  |  |
| Placebo                | 0.44 [ 0.15 - 1.33 ]  |  |
| Pralatrexate           | 0.45 [ 0.15 - 1.57 ]  |  |
| Erlotinib              | 0.45 [ 0.19 - 1.16 ]  |  |
| Pemetrexed+Nintedanib  | 0.47 [ 0.2 - 1.13 ]   |  |
| Afatinib               | 0.48 [ 0.18 - 1.38 ]  |  |
| Pemetrexed+Vandetanib  | 0.48 [ 0.2 - 1.2 ]    |  |
| Dacomitinib            | 0.51 [ 0.2 - 1.39 ]   |  |
| Entinostat+Erlotinib   | 0.52 [ 0.15 - 1.88 ]  |  |
| Pemetrexed             | 0.53 [ 0.26 - 1.09 ]  |  |
| Erlotinib+Sunitinib    | 0.55 [ 0.21 - 1.53 ]  |  |
| Erlotinib+Bevacizumab  | 0.56 [ 0.21 - 1.63 ]  |  |
| Erlotinib+Tivantinib   | 0.57 [ 0.21 - 1.59 ]  |  |
| Vandetanib             | 0.61 [ 0.23 - 1.73 ]  |  |
| Erlotinib+Pazopanib    | 0.64 [ 0.19 - 2.16 ]  |  |
| Icotinib               | 0.64 [ 0.25 - 1.64 ]  |  |
| Erlotinib+Onartuzumab  | 0.66 [ 0.19 - 2.37 ]  |  |
| Amrubicin              | 0.68 [ 0.29 - 1.52 ]  |  |
| Gefitinib              | 0.76 [ 0.56 - 1.06 ]  |  |
| Sunitinib              | 0.8 [ 0.27 - 2.77 ]   |  |
| Pemetrexed+Cetuximab   | 0.87 [ 0.37 - 2.06 ]  |  |
| Pemetrexed+Erlotinib   | 0.91 [ 0.38 - 2.17 ]  |  |
| Erlotinib+R1507        | 0.93 [ 0.21 - 3.86 ]  |  |
| Pembrolizumab          | 0.97 [ 0.59 - 1.59 ]  |  |
| Erlotinib+Figitumumab  | 0.97 [ 0.35 - 2.82 ]  |  |
| Docetaxel+Ramucirumab  | 0.99 [ 0.69 - 1.43 ]  |  |
| Nivolumab              | 1.02 [ 0.68 - 1.47 ]  |  |
| Atezolizumab           | 1.03 [ 0.72 - 1.48 ]  |  |
| Docetaxel+Nintedanib   | 1.13 [ 0.73 - 1.74 ]  |  |
| Docetaxel+Vandetanib   | 1.22 [ 0.78 - 1.89 ]  |  |
| Pemetrexed+Sunitinib   | 1.27 [ 0.4 - 4.42 ]   |  |
| Pemetrexed+Sorafenib   | 1.33 [ 0.37 - 4.91 ]  |  |
| Erlotinib+Everolimus   | 1.47 [ 0.42 - 5.37 ]  |  |
| Docetaxel+Cetuximab    | 1.65 [ 0.94 - 2.96 ]  |  |
| Docetaxel+Aflibercept  | 1.74 [ 1.08 - 2.72 ]  |  |
| Docetaxel+Selumetinib  | 2.15 [ 1.38 - 3.43 ]  |  |
| Trametinib             | 2.17 [ 0.88 - 5.66 ]  |  |
| Cabozantinib           | 2.2 [ 0.61 - 9.4 ]    |  |
| Cetuximab              | 2.41 [ 0.51 - 13.68 ] |  |
| Erlotinib+Cabozantinib | 2.42 [ 0.64 - 10 ]    |  |

0.088 0.177 0.354 0.707 1.410

## Treatments vs. Pemetrexed

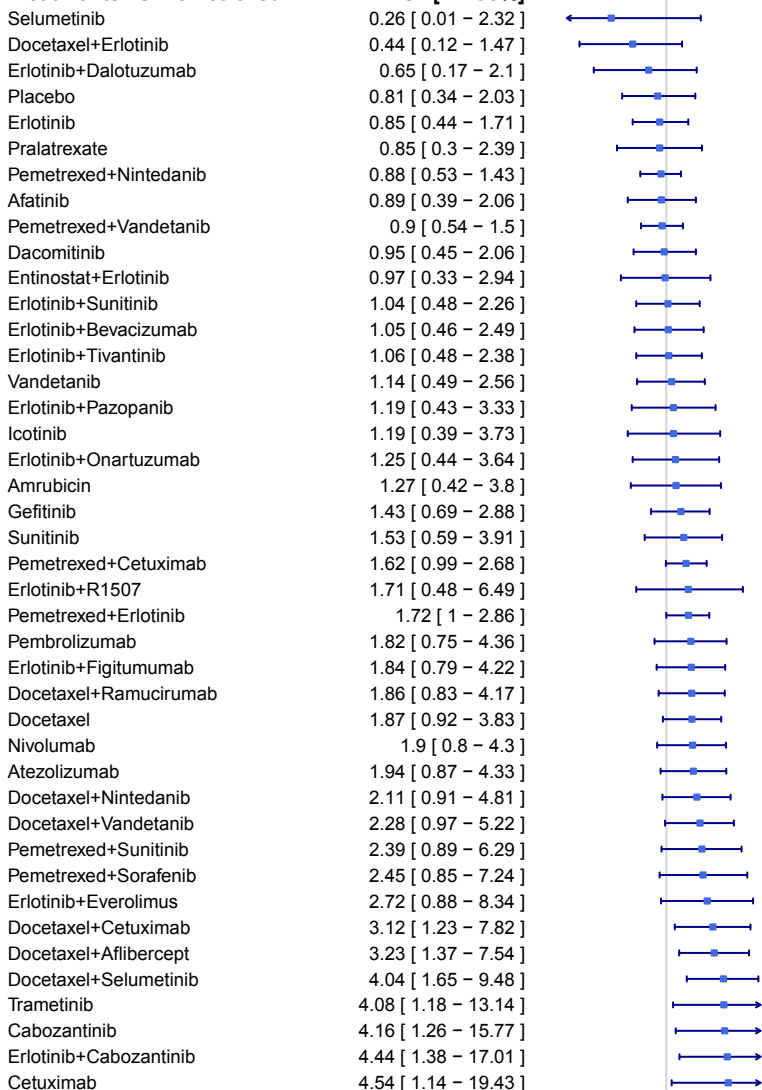

0.088 0.177 0.354 0.707 1.410

## Treatments vs. Erlotinib

| Treatment              | OR [CrI 95%]          |
|------------------------|-----------------------|
| Selumetinib            | 0.31 [ 0.01 – 3.03 ]  |
| Docetaxel+Erlotinib    | 0.52 [ 0.18 – 1.45 ]  |
| Erlotinib+Dalotuzumab  | 0.76 [ 0.27 – 2.06 ]  |
| Placebo                | 0.96 [ 0.52 – 1.78 ]  |
| Pralatrexate           | 1 [ 0.49 – 2.03 ]     |
| Pemetrexed+Nintedanib  | 1.03 [ 0.45 – 2.37 ]  |
| Afatinib               | 1.05 [ 0.65 – 1.72 ]  |
| Pemetrexed+Vandetanib  | 1.06 [ 0.45 – 2.51 ]  |
| Dacomitinib            | 1.12 [ 0.77 – 1.64 ]  |
| Entinostat+Erlotinib   | 1.14 [ 0.51 – 2.57 ]  |
| Pemetrexed             | 1.18 [ 0.59 – 2.28 ]  |
| Erlotinib+Sunitinib    | 1.23 [ 0.82 – 1.79 ]  |
| Erlotinib+Tivantinib   | 1.24 [ 0.8 – 1.95 ]   |
| Erlotinib+Bevacizumab  | 1.24 [ 0.76 – 2.02 ]  |
| Vandetanib             | 1.34 [ 0.84 – 2.15 ]  |
| Erlotinib+Pazopanib    | 1.38 [ 0.67 – 2.94 ]  |
| Icotinib               | 1.4 [ 0.39 – 4.98 ]   |
| Erlotinib+Onartuzumab  | 1.45 [ 0.67 – 3.28 ]  |
| Amrubicin              | 1.47 [ 0.43 – 5.11 ]  |
| Gefitinib              | 1.67 [ 0.65 – 4.1 ]   |
| Sunitinib              | 1.78 [ 0.59 – 5.57 ]  |
| Pemetrexed+Cetuximab   | 1.91 [ 0.83 – 4.34 ]  |
| Pemetrexed+Erlotinib   | 2.02 [ 0.98 – 4.01 ]  |
| Erlotinib+R1507        | 2.02 [ 0.7 – 5.81 ]   |
| Pembrolizumab          | 2.14 [ 0.74 – 5.91 ]  |
| Erlotinib+Figitumumab  | 2.14 [ 1.31 – 3.55 ]  |
| Docetaxel+Ramucirumab  | 2.19 [ 0.8 – 5.67 ]   |
| Docetaxel              | 2.2 [ 0.86 – 5.21 ]   |
| Nivolumab              | 2.23 [ 0.81 – 5.83 ]  |
| Atezolizumab           | 2.26 [ 0.83 – 5.85 ]  |
| Docetaxel+Nintedanib   | 2.49 [ 0.89 – 6.71 ]  |
| Docetaxel+Vandetanib   | 2.67 [ 0.94 – 7.22 ]  |
| Pemetrexed+Sunitinib   | 2.77 [ 0.89 – 9.04 ]  |
| Pemetrexed+Sorafenib   | 2.94 [ 0.75 – 10.17 ] |
| Erlotinib+Everolimus   | 3.23 [ 1.36 – 7.65 ]  |
| Docetaxel+Cetuximab    | 3.61 [ 1.25 – 10.78 ] |
| Docetaxel+Aflibercept  | 3.78 [ 1.35 – 10.26 ] |
| Docetaxel+Selumetinib  | 4.78 [ 1.7 – 13 ]     |
| Trametinib             | 4.86 [ 1.26 – 17.5 ]  |
| Cabozantinib           | 4.91 [ 1.79 – 14.82 ] |
| Erlotinib+Cabozantinib | 5.24 [ 1.9 – 16.33 ]  |
| Cetuximab              | 5.34 [ 1.11 – 25.15 ] |

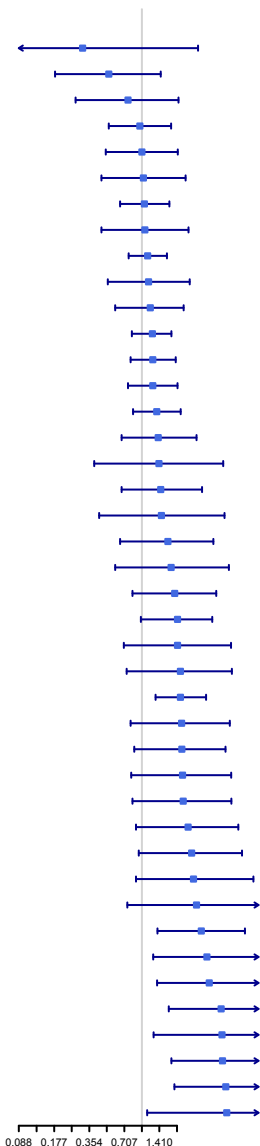

**Treatments vs. Gefitinib**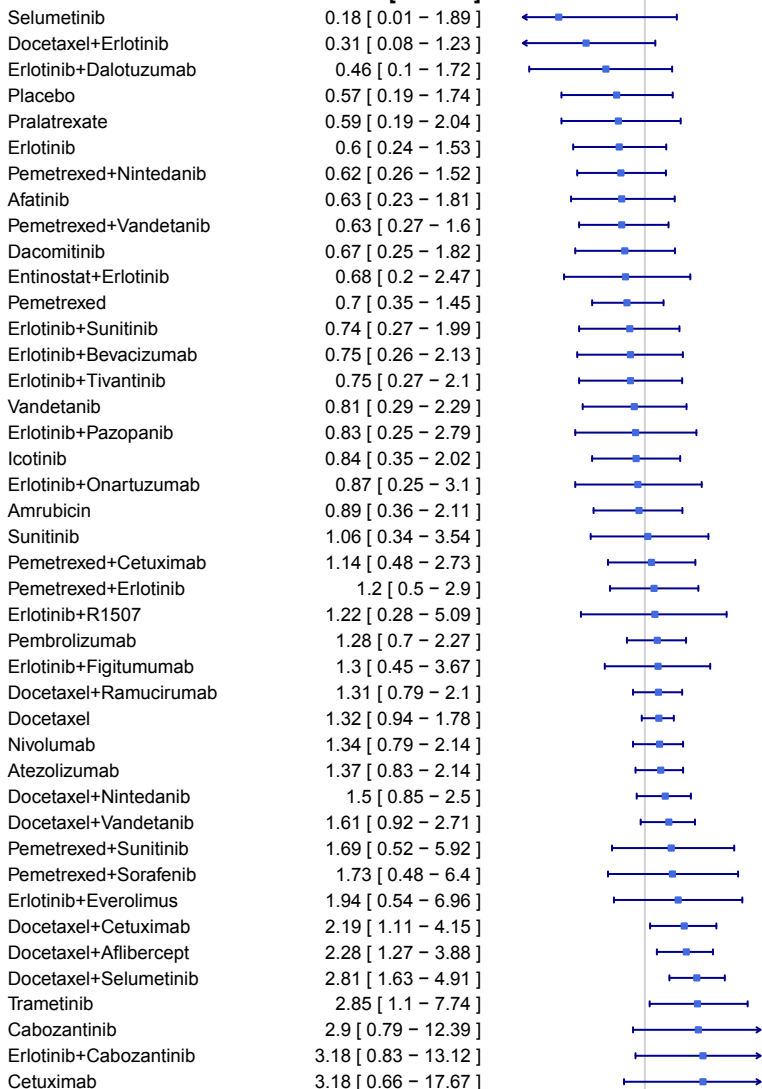

0.088 0.177 0.354 0.707 1.410

## Treatments vs. Nivolumab

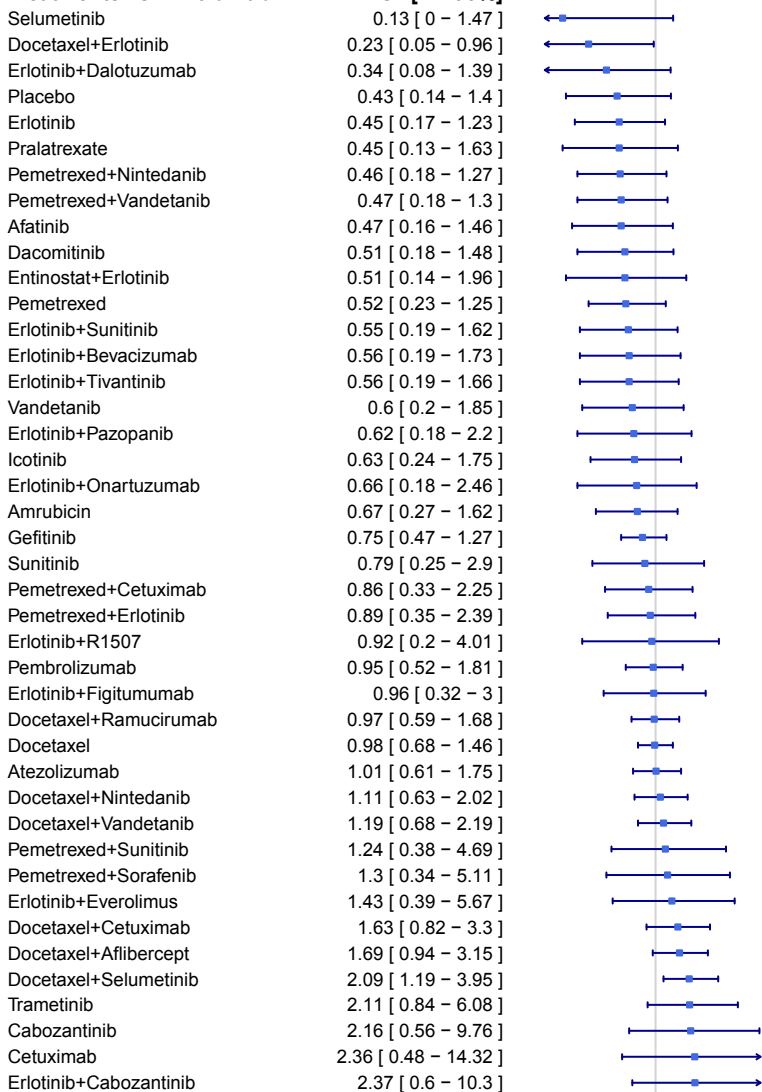

0.088 0.177 0.354 0.707 1.410

## Treatments vs. Pembrolizumab

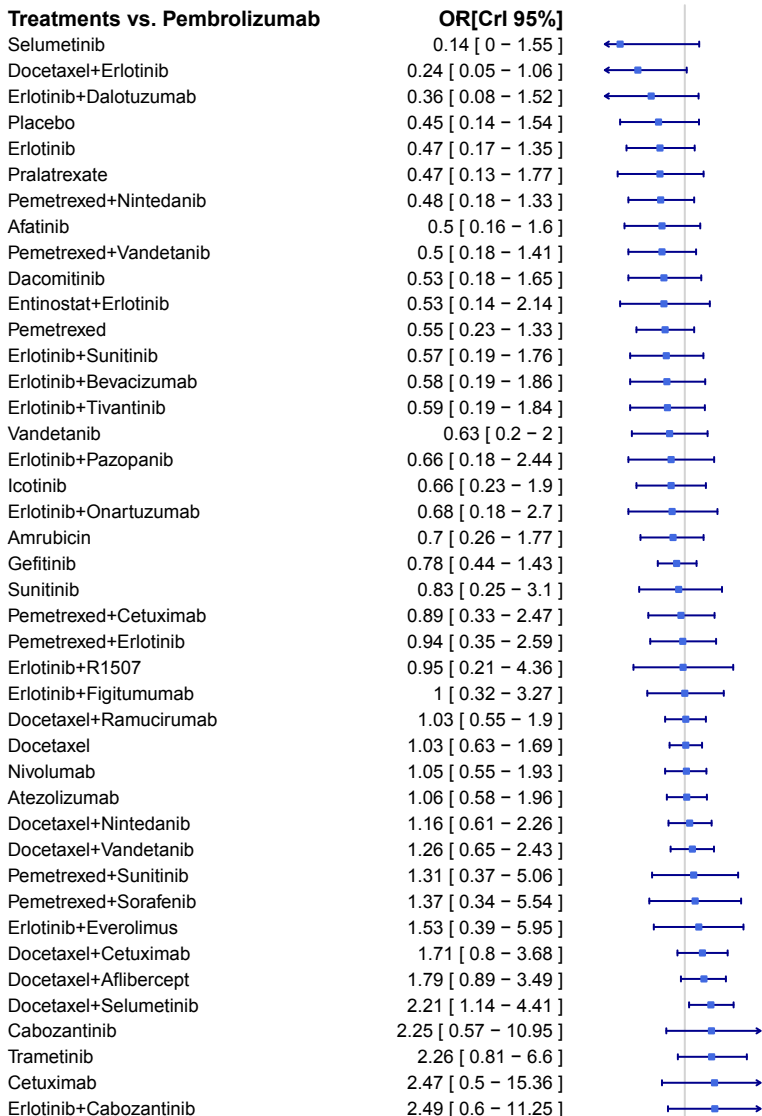

0.088 0.250 0.707 2.00

## Treatments vs. Atezolizumab

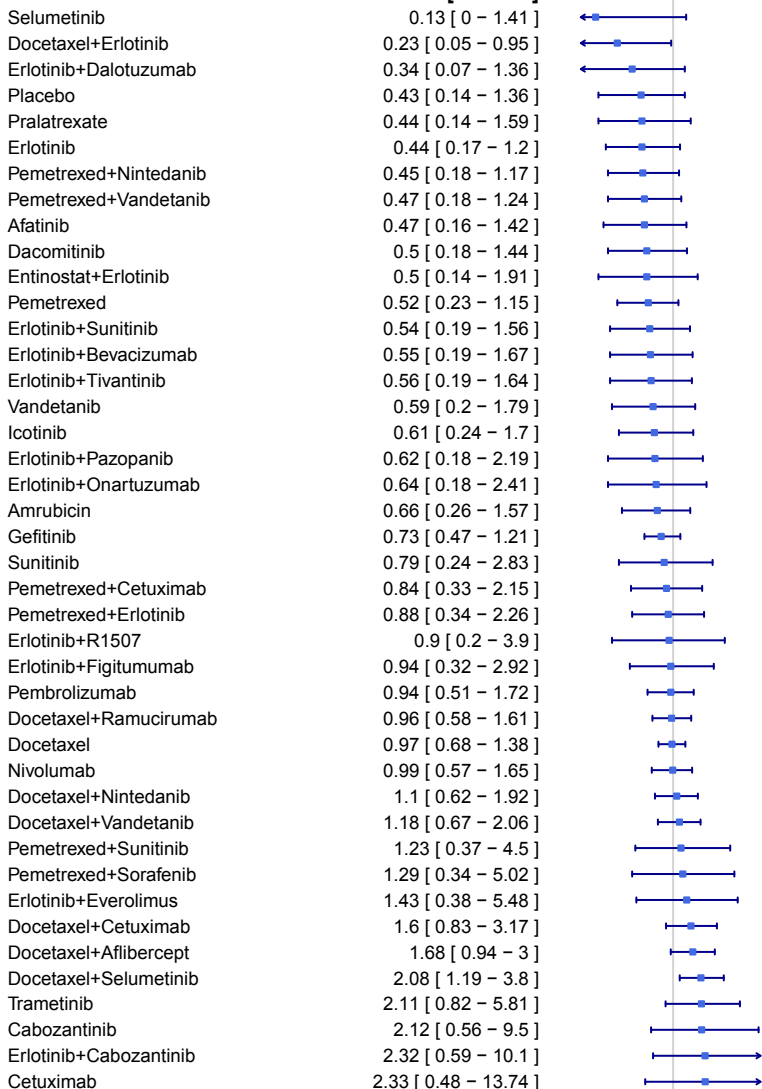

0.088 0.250 0.707 2.00



## Treatments vs. Docetaxel+Nintedanib

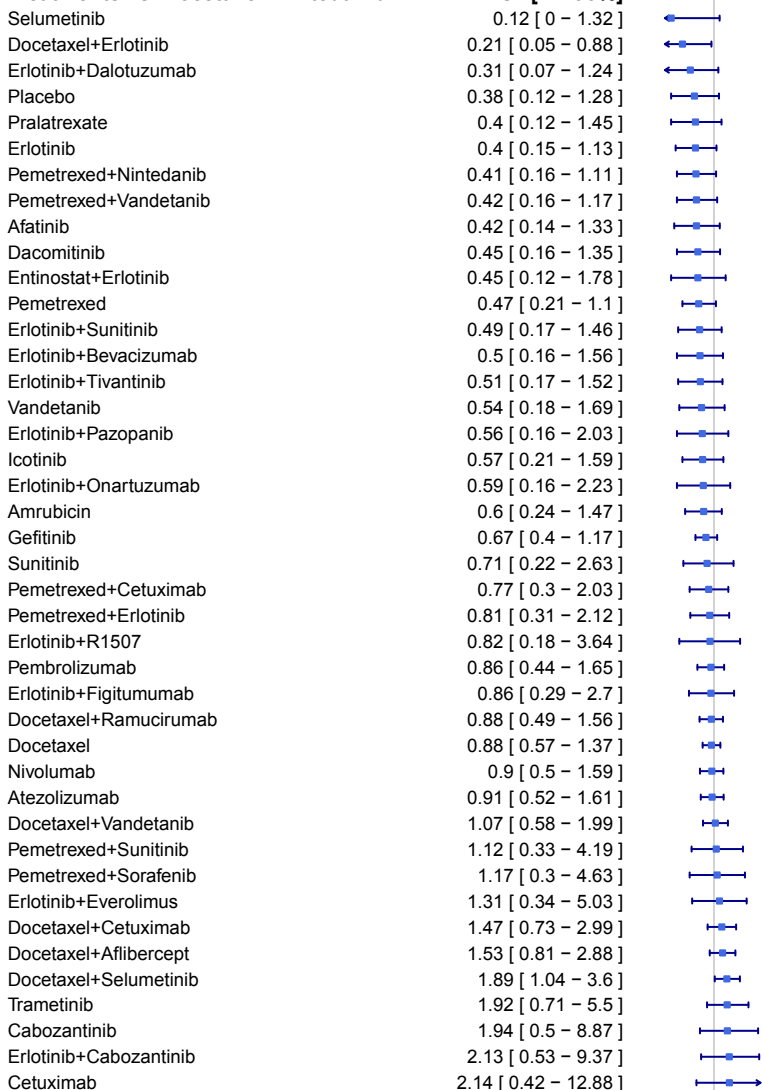

## Treatments vs. Docetaxel+Ramucirumab

| Treatment              | OR [CrI 95%]          |
|------------------------|-----------------------|
| Selumetinib            | 0.14 [ 0 - 1.49 ]     |
| Docetaxel+Erlotinib    | 0.24 [ 0.05 - 0.99 ]  |
| Erlotinib+Dalotuzumab  | 0.35 [ 0.08 - 1.41 ]  |
| Placebo                | 0.44 [ 0.14 - 1.43 ]  |
| Erlotinib              | 0.46 [ 0.18 - 1.25 ]  |
| Pralatrexate           | 0.46 [ 0.14 - 1.64 ]  |
| Pemetrexed+Nintedanib  | 0.47 [ 0.19 - 1.21 ]  |
| Afatinib               | 0.48 [ 0.16 - 1.47 ]  |
| Pemetrexed+Vandetanib  | 0.48 [ 0.19 - 1.3 ]   |
| Dacomitinib            | 0.52 [ 0.19 - 1.51 ]  |
| Entinostat+Erlotinib   | 0.52 [ 0.14 - 1.98 ]  |
| Pemetrexed             | 0.54 [ 0.24 - 1.2 ]   |
| Erlotinib+Sunitinib    | 0.56 [ 0.2 - 1.63 ]   |
| Erlotinib+Bevacizumab  | 0.57 [ 0.19 - 1.73 ]  |
| Erlotinib+Tivantinib   | 0.58 [ 0.2 - 1.71 ]   |
| Vandetanib             | 0.62 [ 0.21 - 1.87 ]  |
| Erlotinib+Pazopanib    | 0.64 [ 0.19 - 2.28 ]  |
| Icotinib               | 0.64 [ 0.24 - 1.79 ]  |
| Erlotinib+Onartuzumab  | 0.68 [ 0.19 - 2.51 ]  |
| Amrubicin              | 0.69 [ 0.27 - 1.64 ]  |
| Gefitinib              | 0.76 [ 0.48 - 1.27 ]  |
| Sunitinib              | 0.81 [ 0.25 - 2.84 ]  |
| Pemetrexed+Cetuximab   | 0.88 [ 0.34 - 2.25 ]  |
| Pemetrexed+Erlotinib   | 0.92 [ 0.36 - 2.35 ]  |
| Erlotinib+R1507        | 0.93 [ 0.21 - 4.06 ]  |
| Pembrolizumab          | 0.97 [ 0.53 - 1.81 ]  |
| Erlotinib+Figitumumab  | 0.98 [ 0.33 - 3.05 ]  |
| Docetaxel              | 1.01 [ 0.7 - 1.46 ]   |
| Nivolumab              | 1.03 [ 0.6 - 1.71 ]   |
| Atezolizumab           | 1.04 [ 0.62 - 1.74 ]  |
| Docetaxel+Nintedanib   | 1.14 [ 0.64 - 2.02 ]  |
| Docetaxel+Vandetanib   | 1.23 [ 0.69 - 2.18 ]  |
| Pemetrexed+Sunitinib   | 1.28 [ 0.38 - 4.7 ]   |
| Pemetrexed+Sorafenib   | 1.33 [ 0.34 - 5.21 ]  |
| Erlotinib+Everolimus   | 1.49 [ 0.4 - 5.5 ]    |
| Docetaxel+Cetuximab    | 1.67 [ 0.85 - 3.3 ]   |
| Docetaxel+Aflibercept  | 1.74 [ 0.96 - 3.13 ]  |
| Docetaxel+Selumetinib  | 2.16 [ 1.21 - 3.95 ]  |
| Trametinib             | 2.19 [ 0.84 - 6.18 ]  |
| Cabozantinib           | 2.22 [ 0.57 - 10.02 ] |
| Erlotinib+Cabozantinib | 2.43 [ 0.61 - 10.56 ] |
| Cetuximab              | 2.44 [ 0.5 - 14.59 ]  |

## Treatments vs. Afatinib

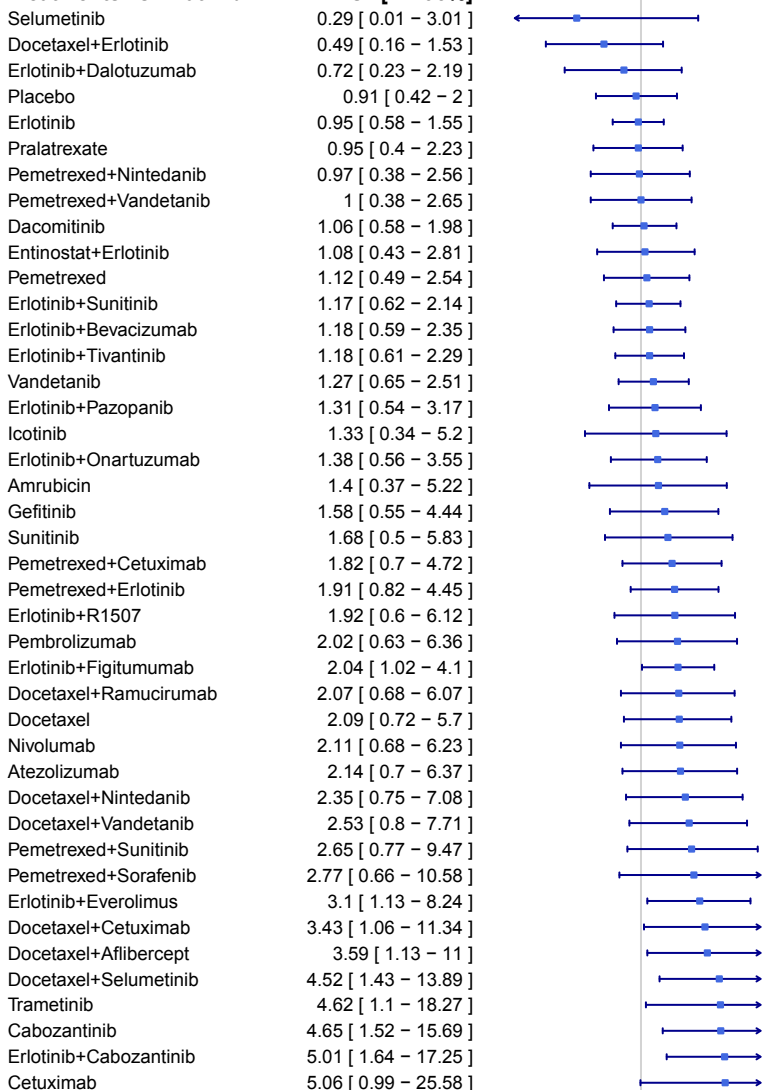

0.088 0.177 0.354 0.707 1.410

## Treatments vs. Cabozantinib

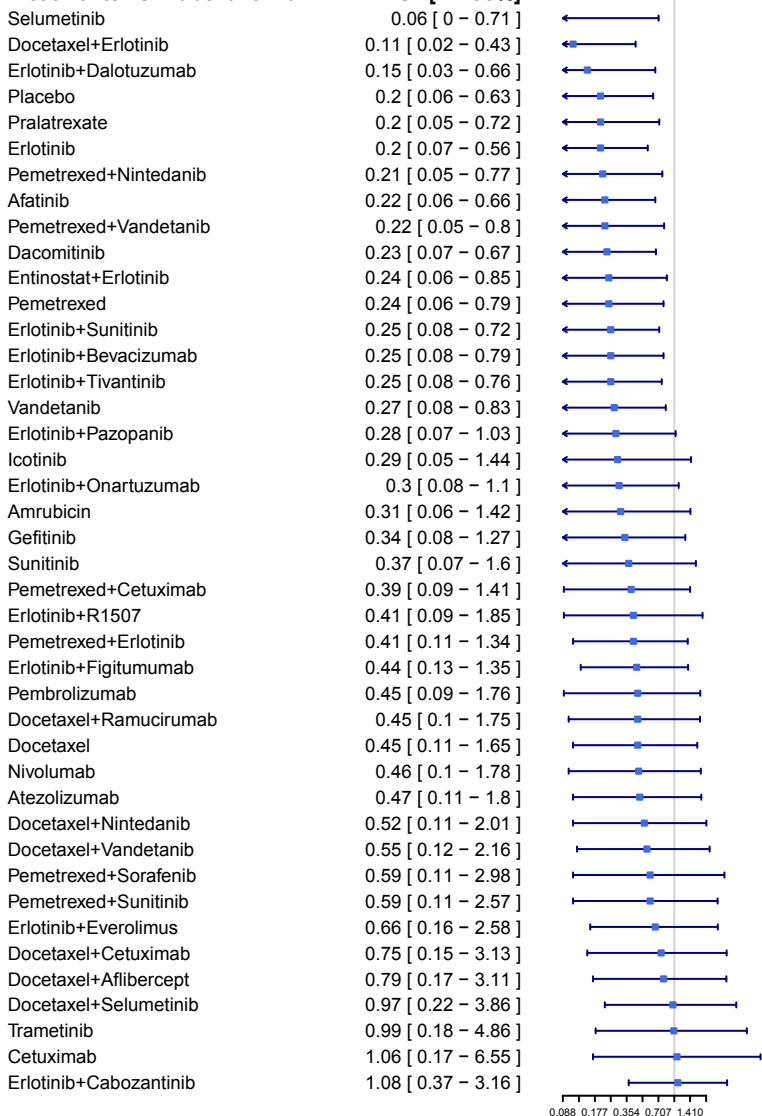

## Treatments vs. Erlotinib+Cabozantinib

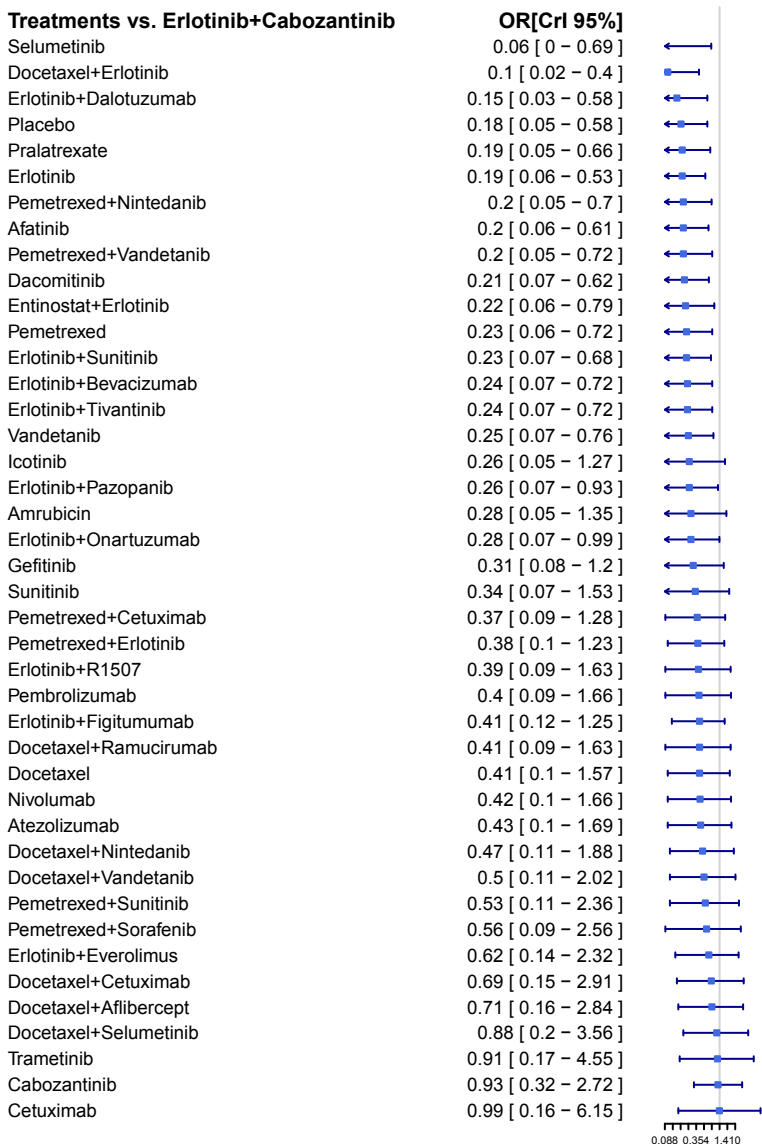

## Treatments vs. Placebo

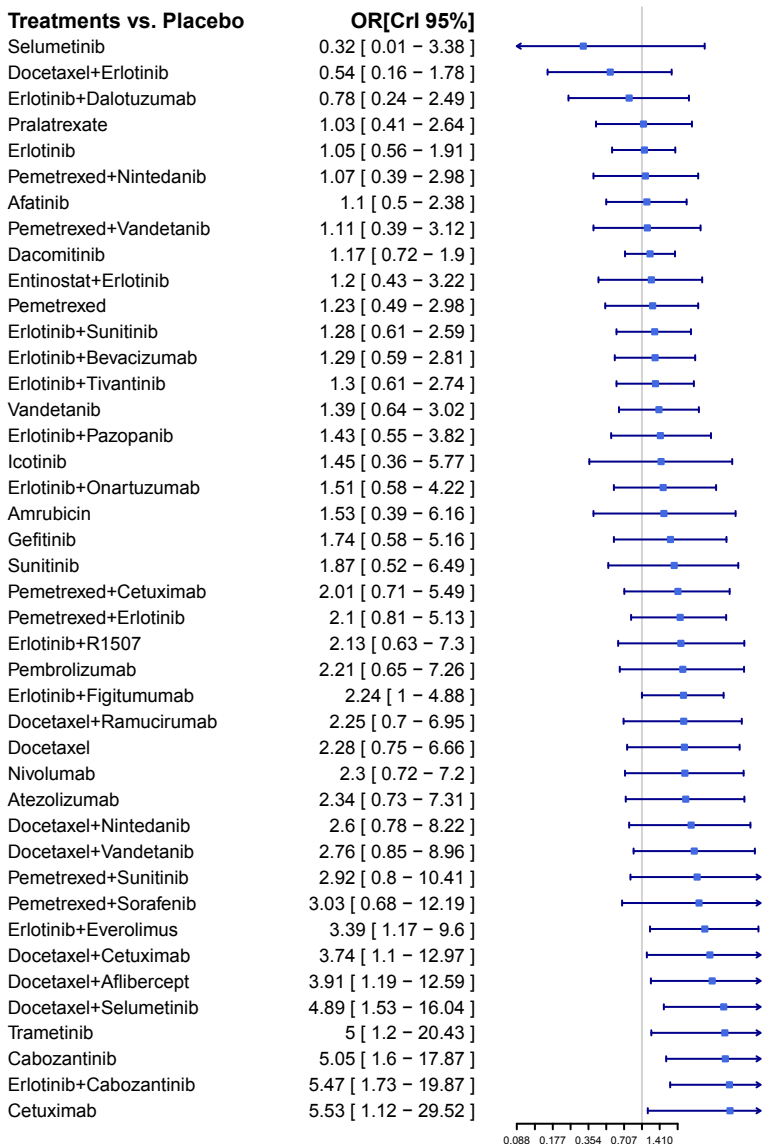

**Appendix Figure 2: Cumulative ranking curves and SUCRA values for 4 outcomes**

Cumulative Probabilities

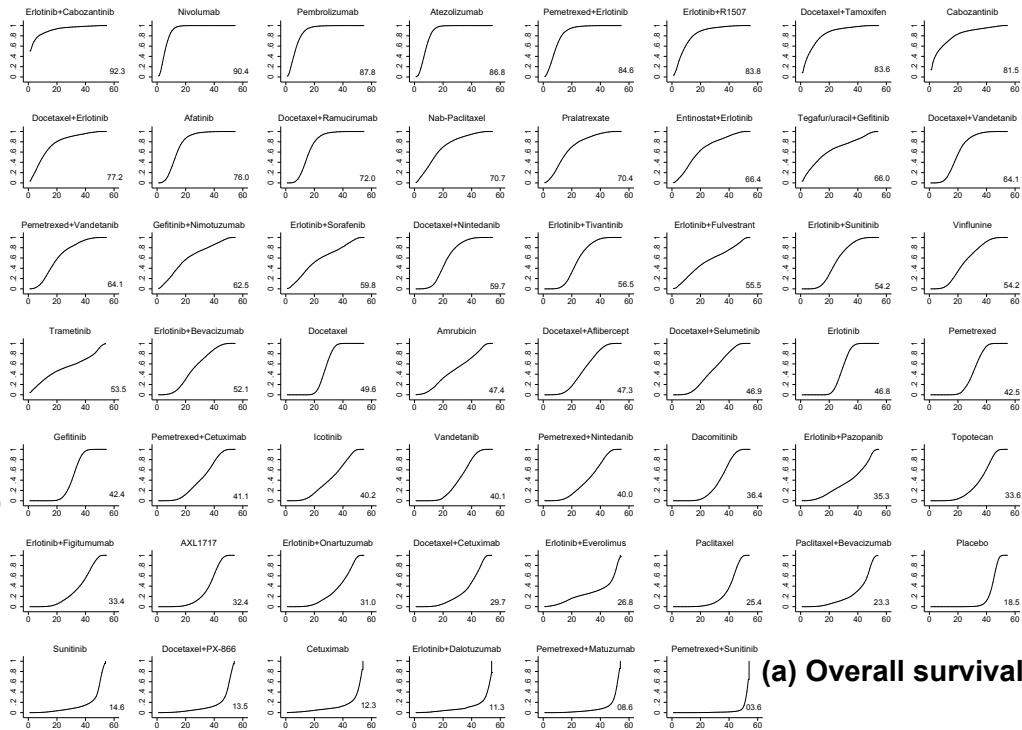

(a) Overall survival

Rank



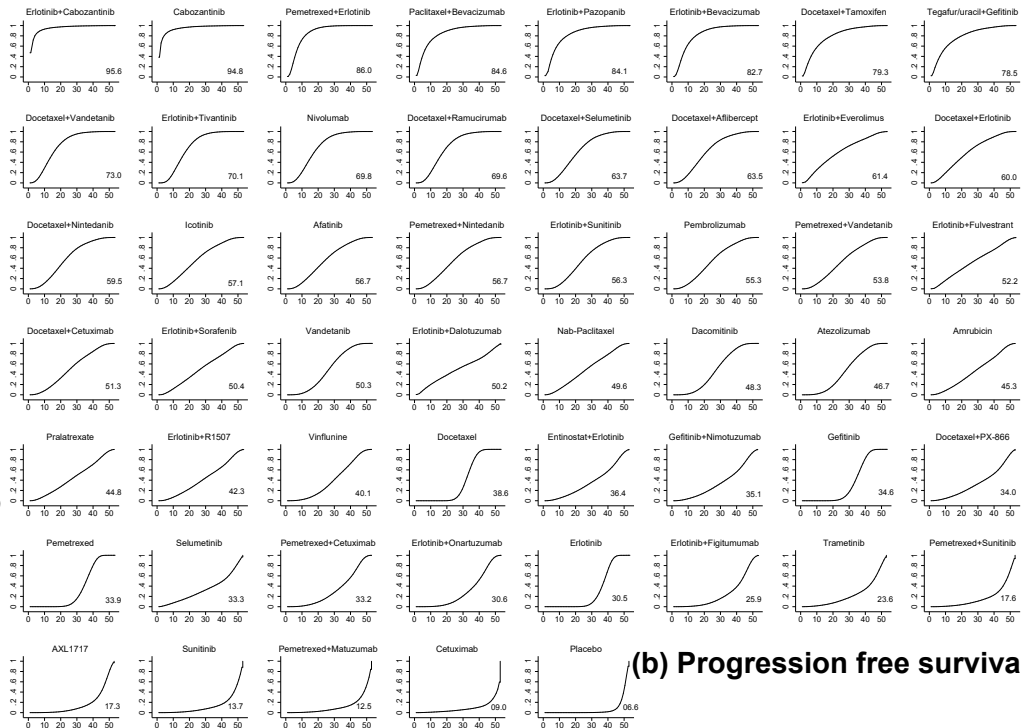

(b) Progression free survival

Rank

Cumulative Probabilities

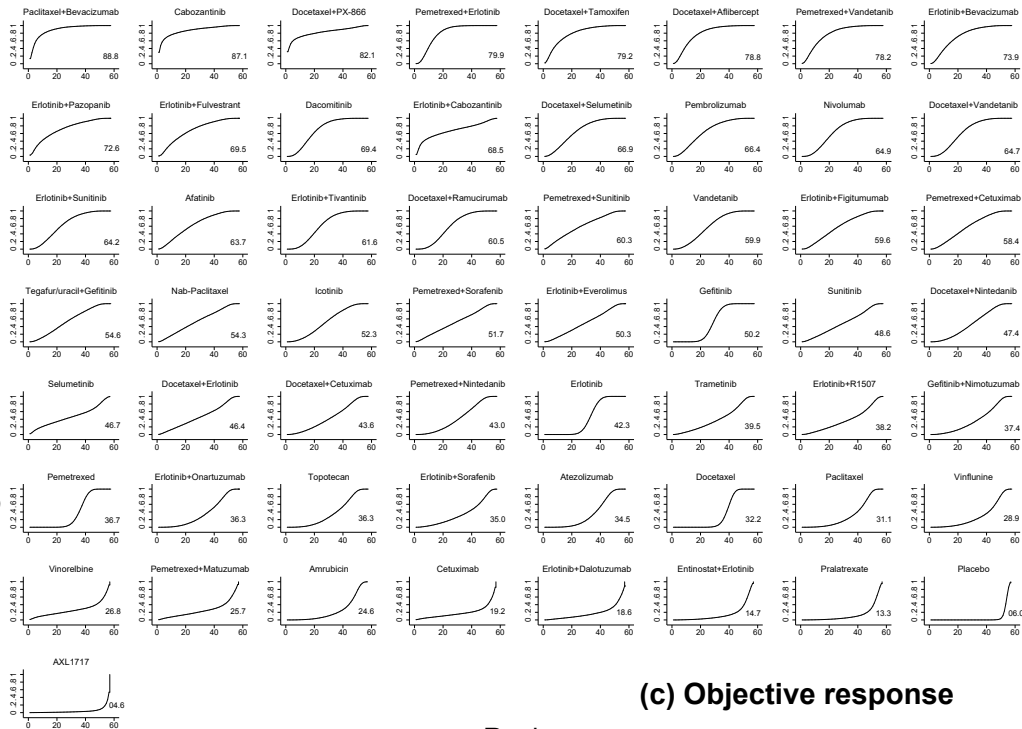

(c) Objective response

Rank

Cumulative Probabilities

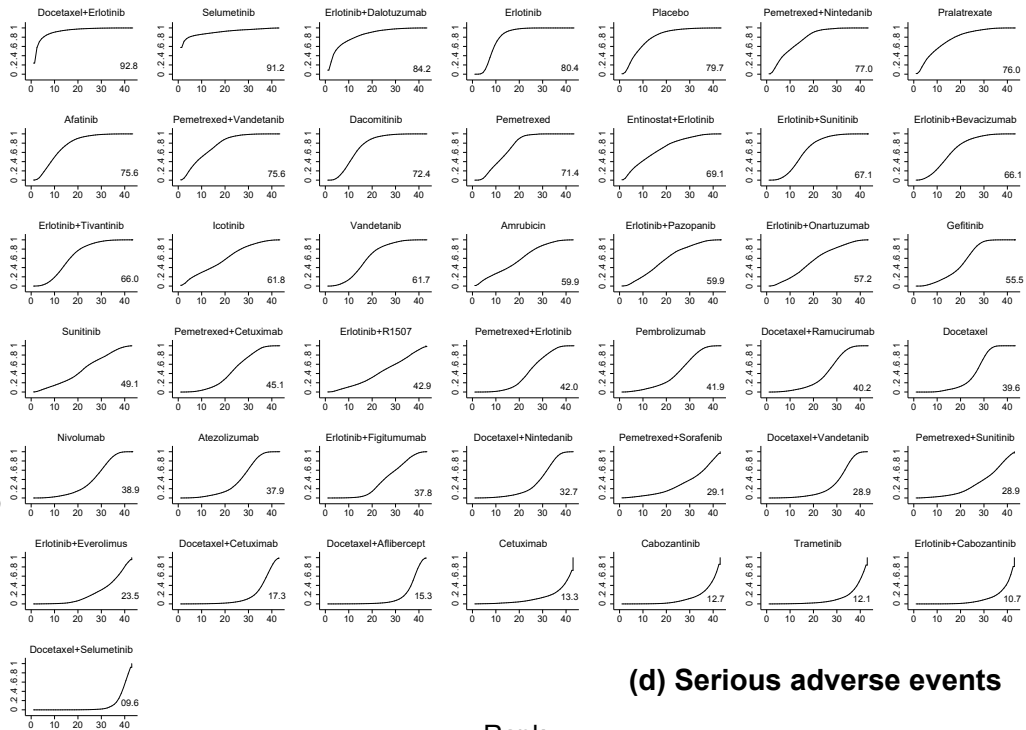

(d) Serious adverse events

**Appendix Figure 3: Rankograms for 4 outcomes**

Probabilities

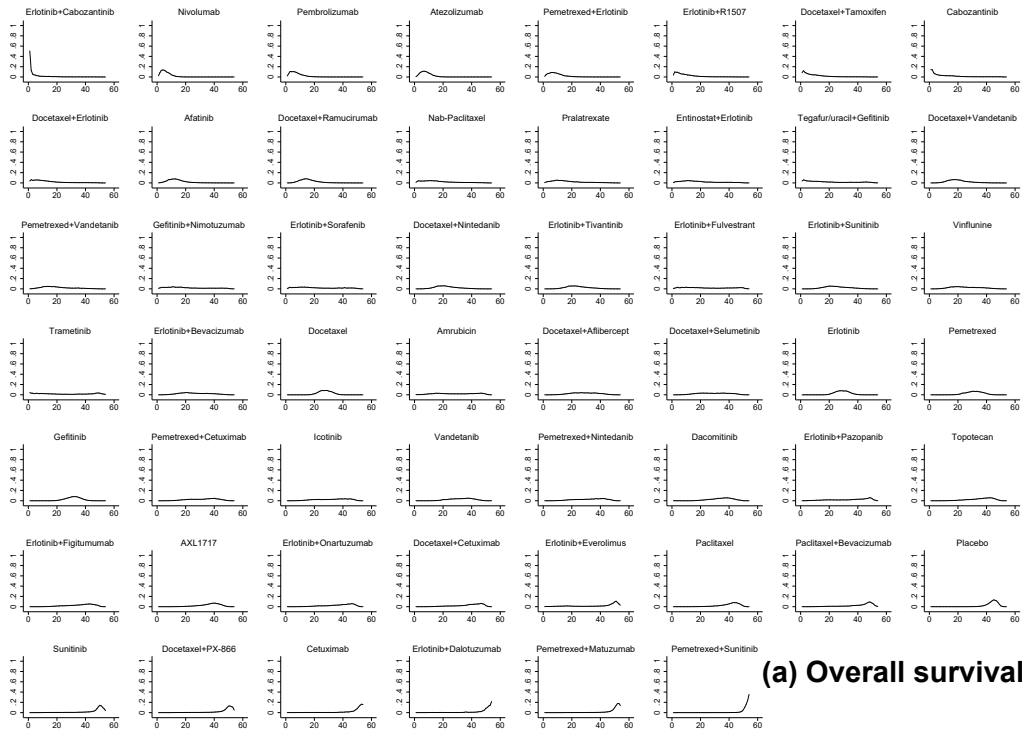

(a) Overall survival

Rank

Probabilities

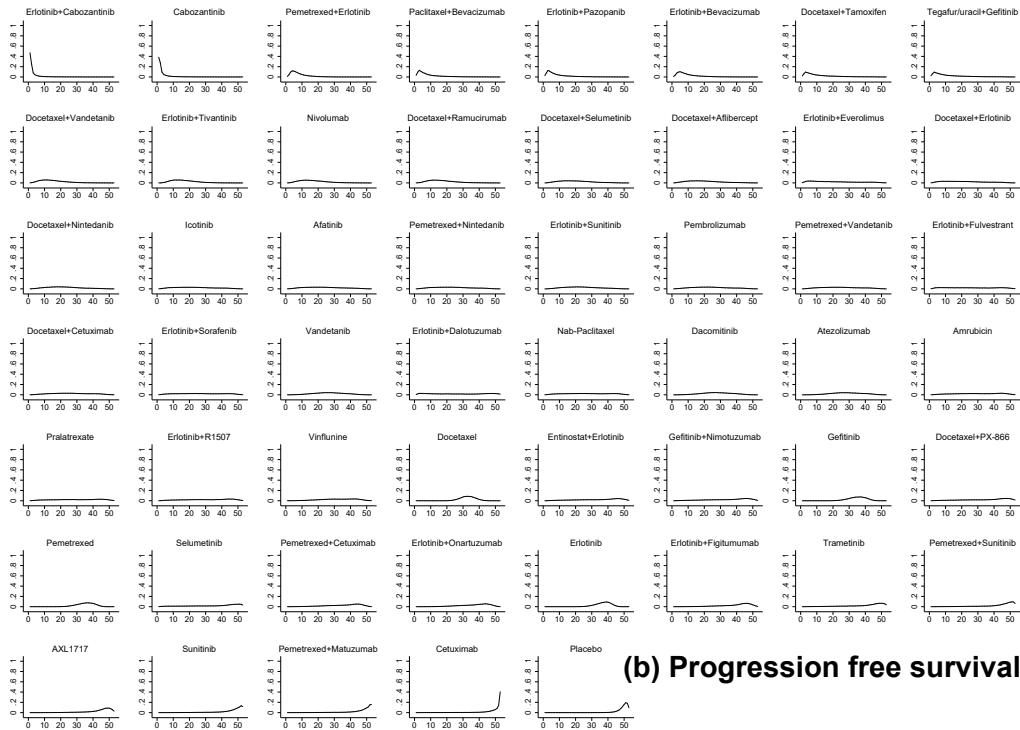

(b) Progression free survival

Rank

Probabilities

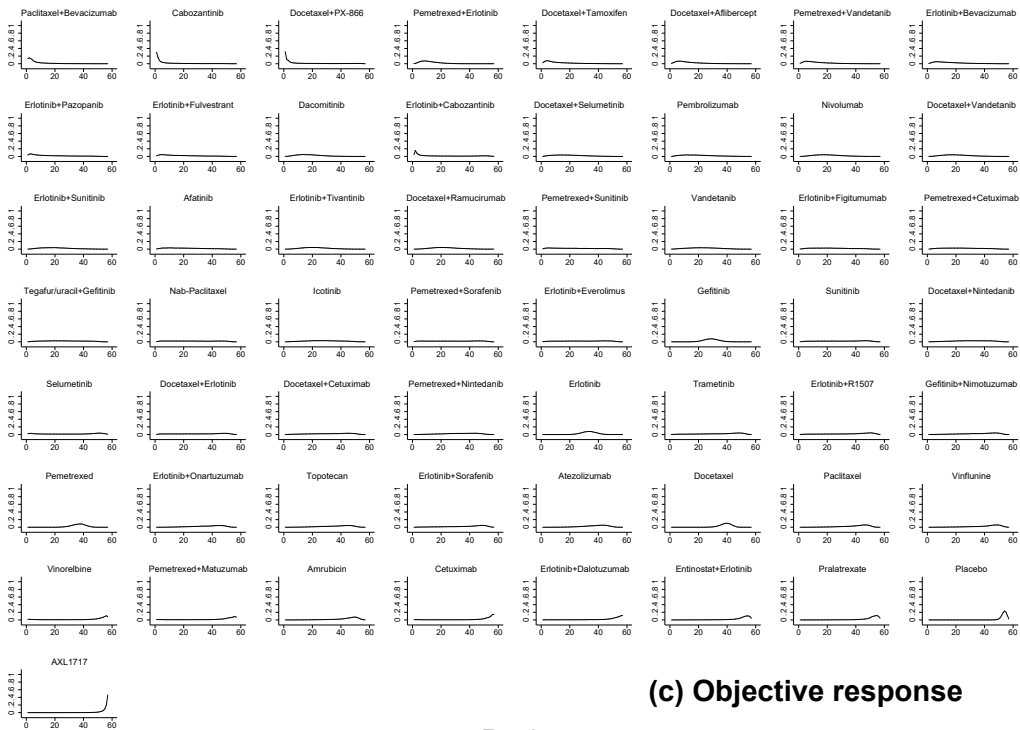

(c) Objective response

Rank

Probabilities

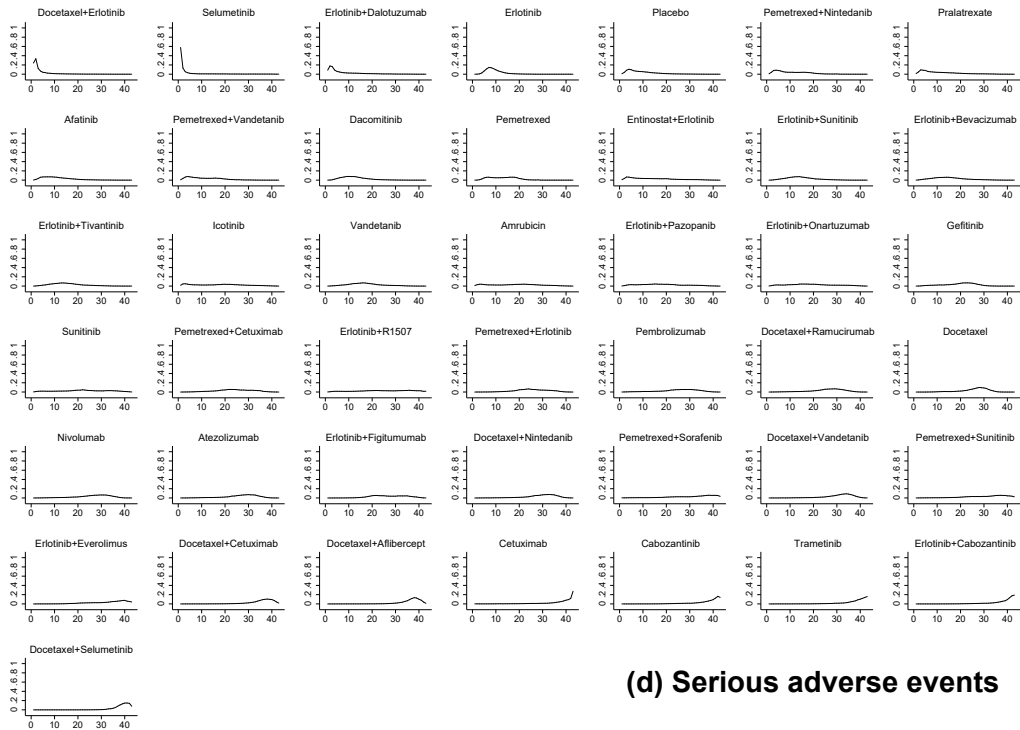

(d) Serious adverse events

Rank



**Appendix Figure 4: Evaluation of inconsistency**

# Overall Survival

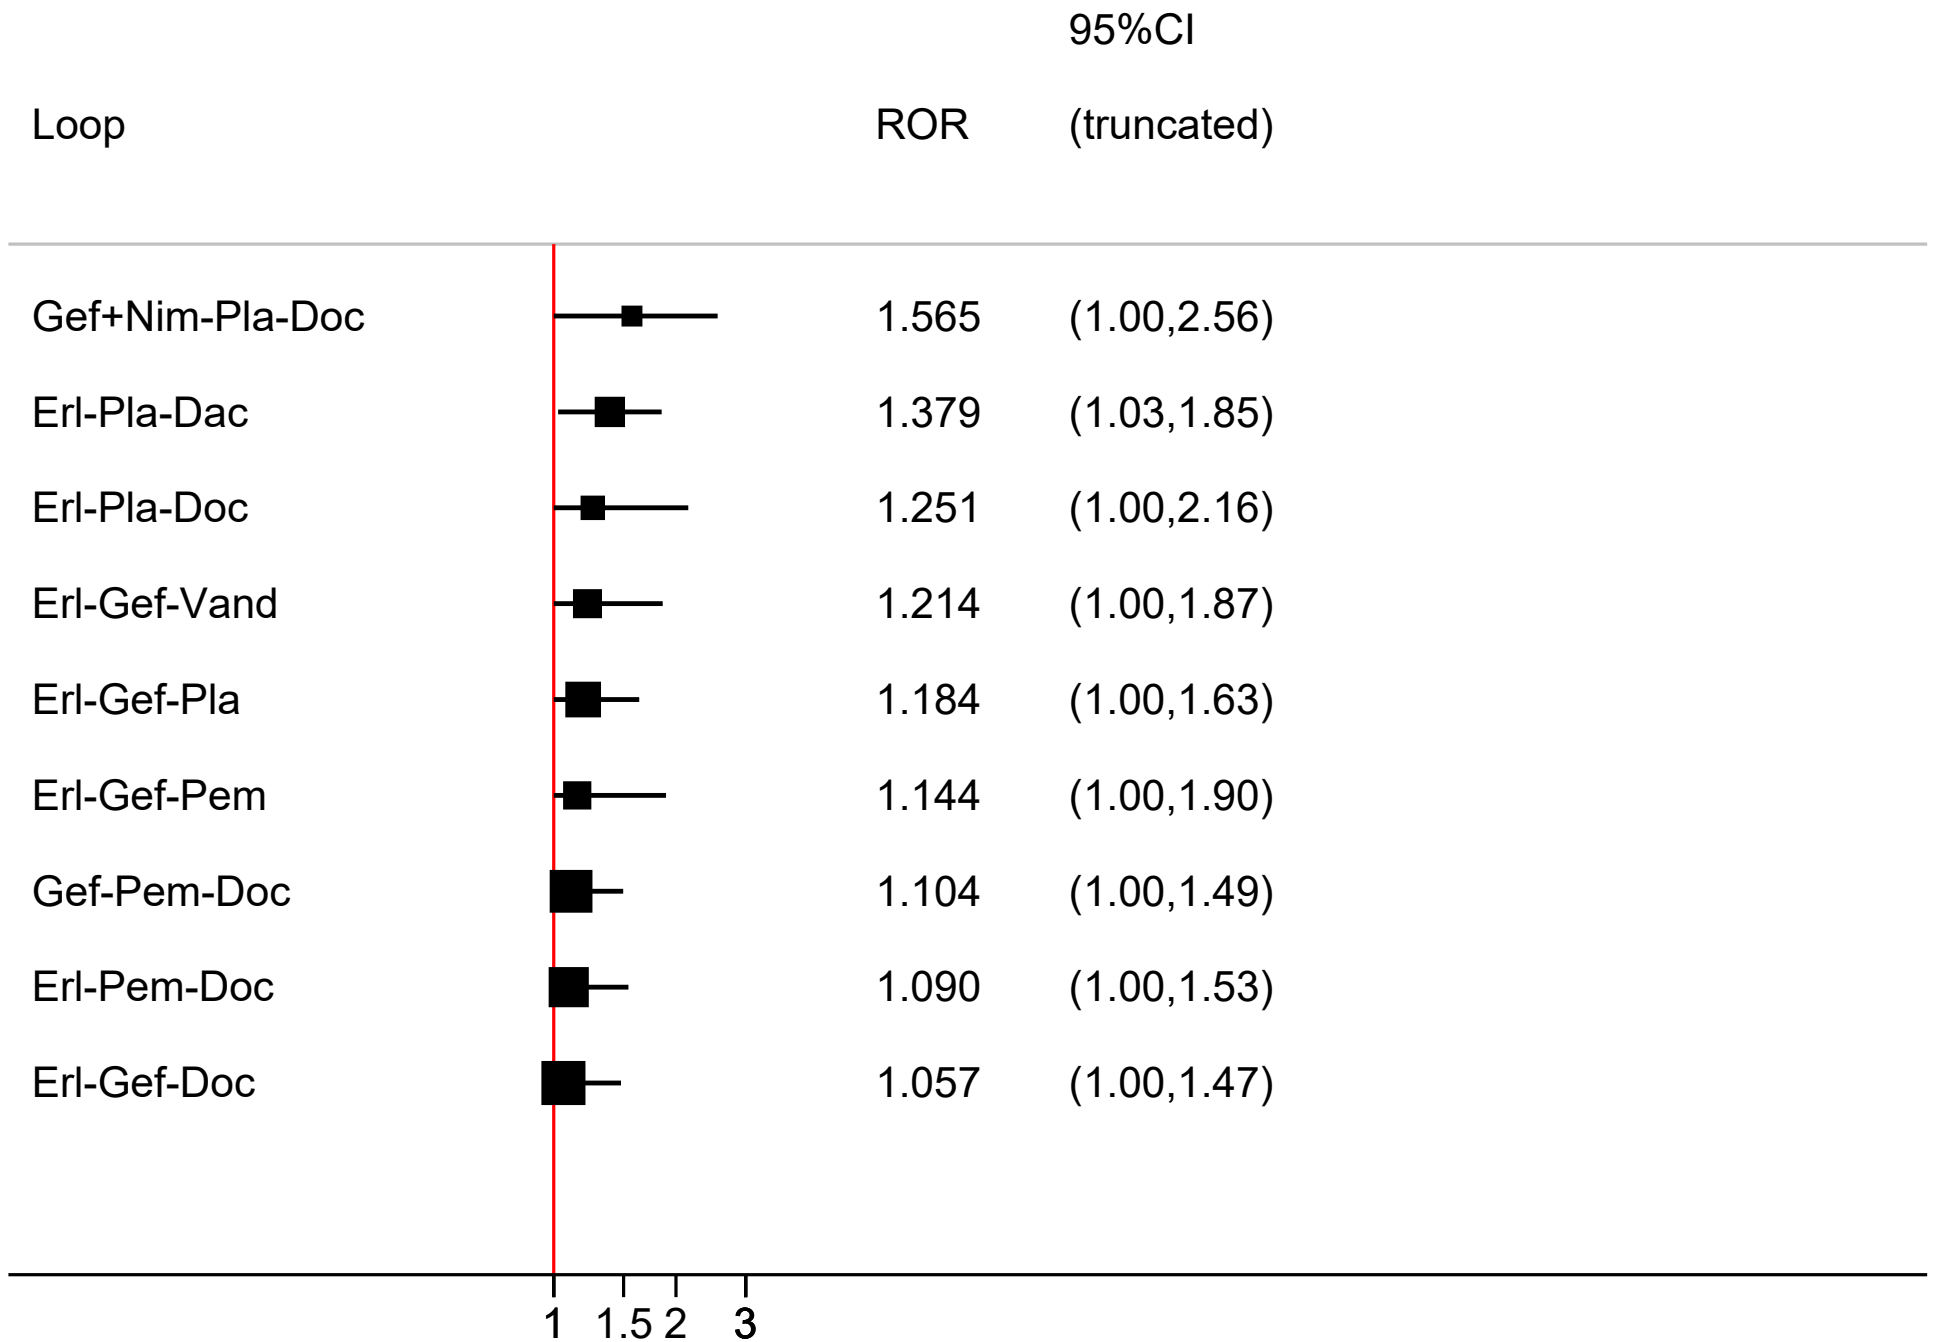

Design-by-treatment interaction model p-value=0.22

# Progression free survival

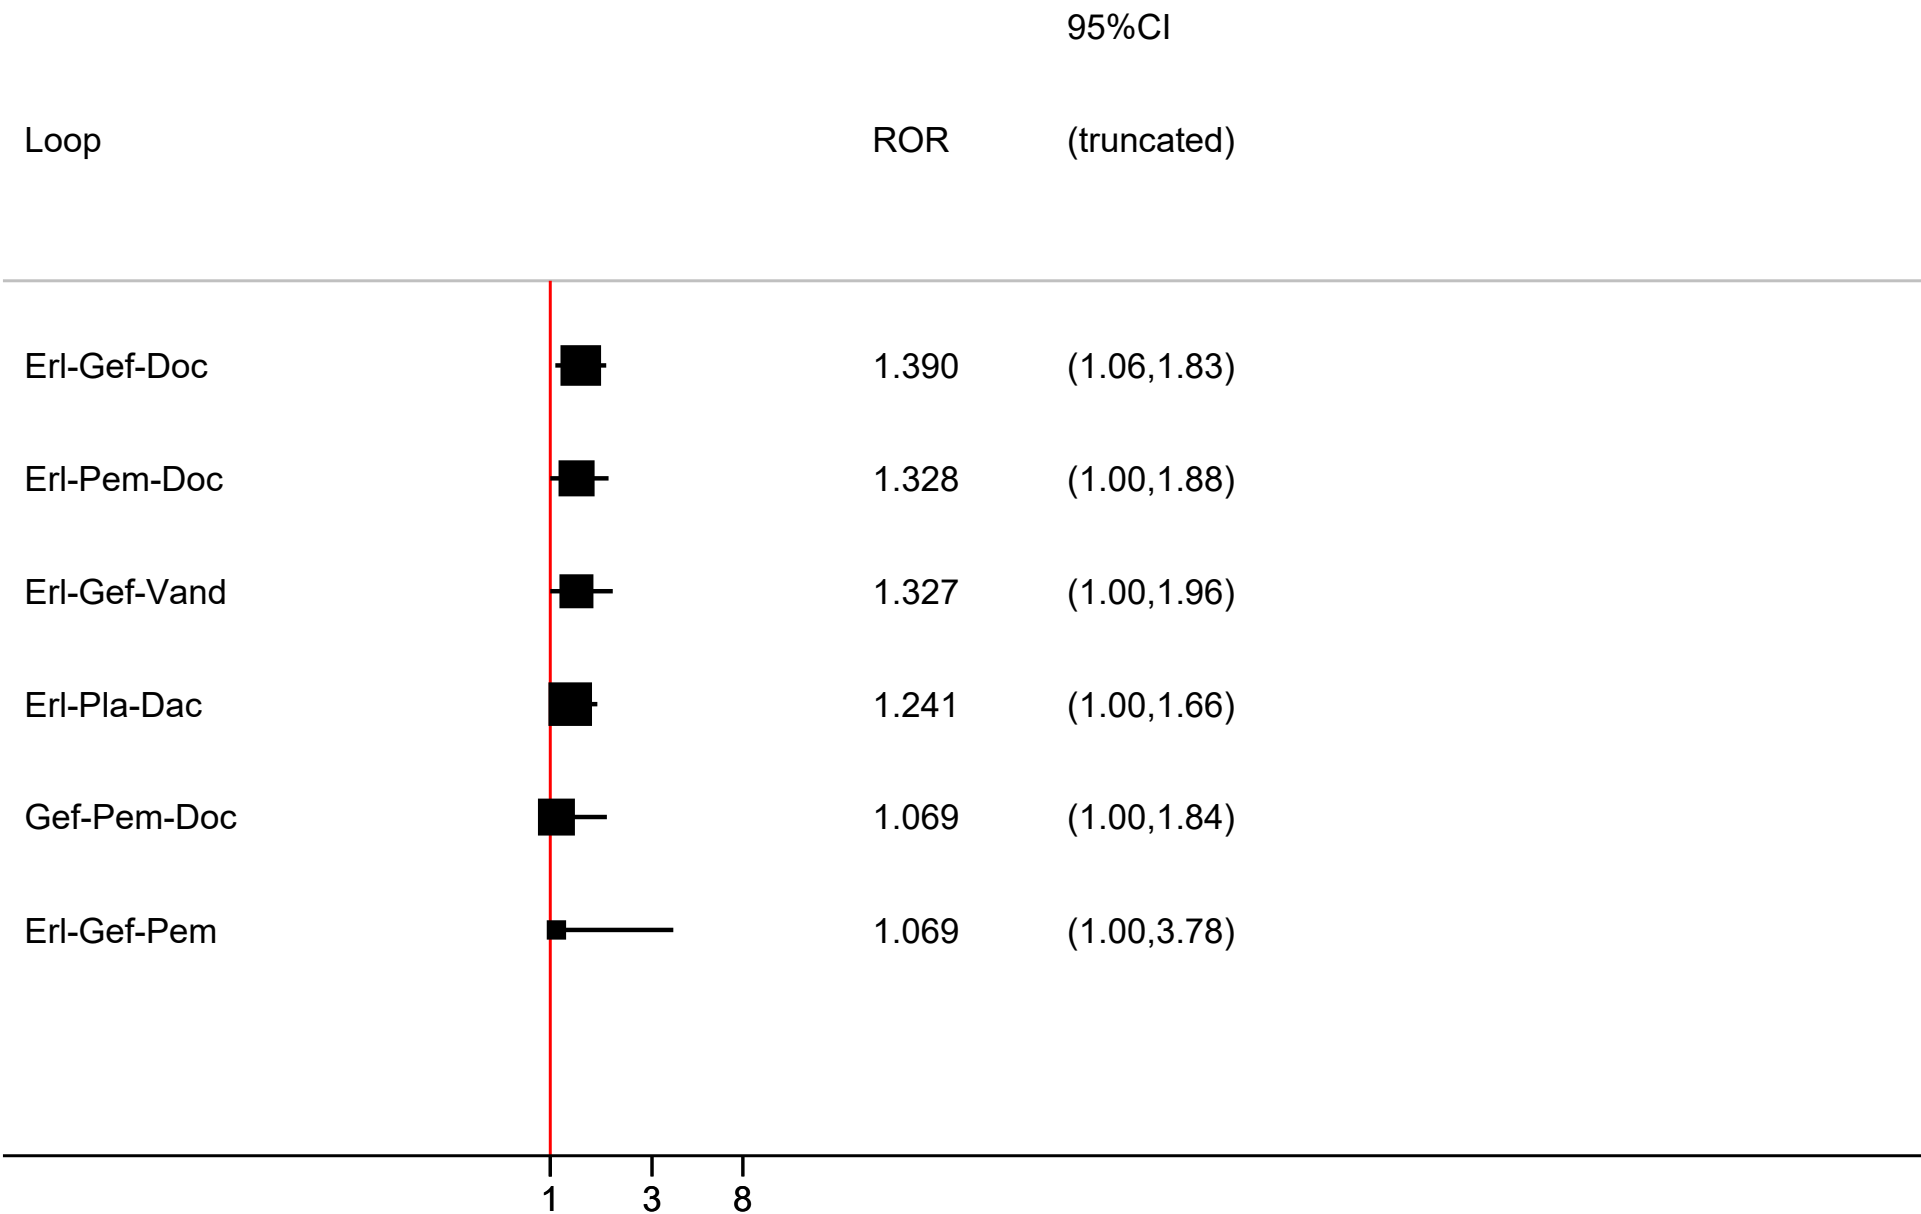

Design-by-treatment interaction model p-value=0.26

# Objective response

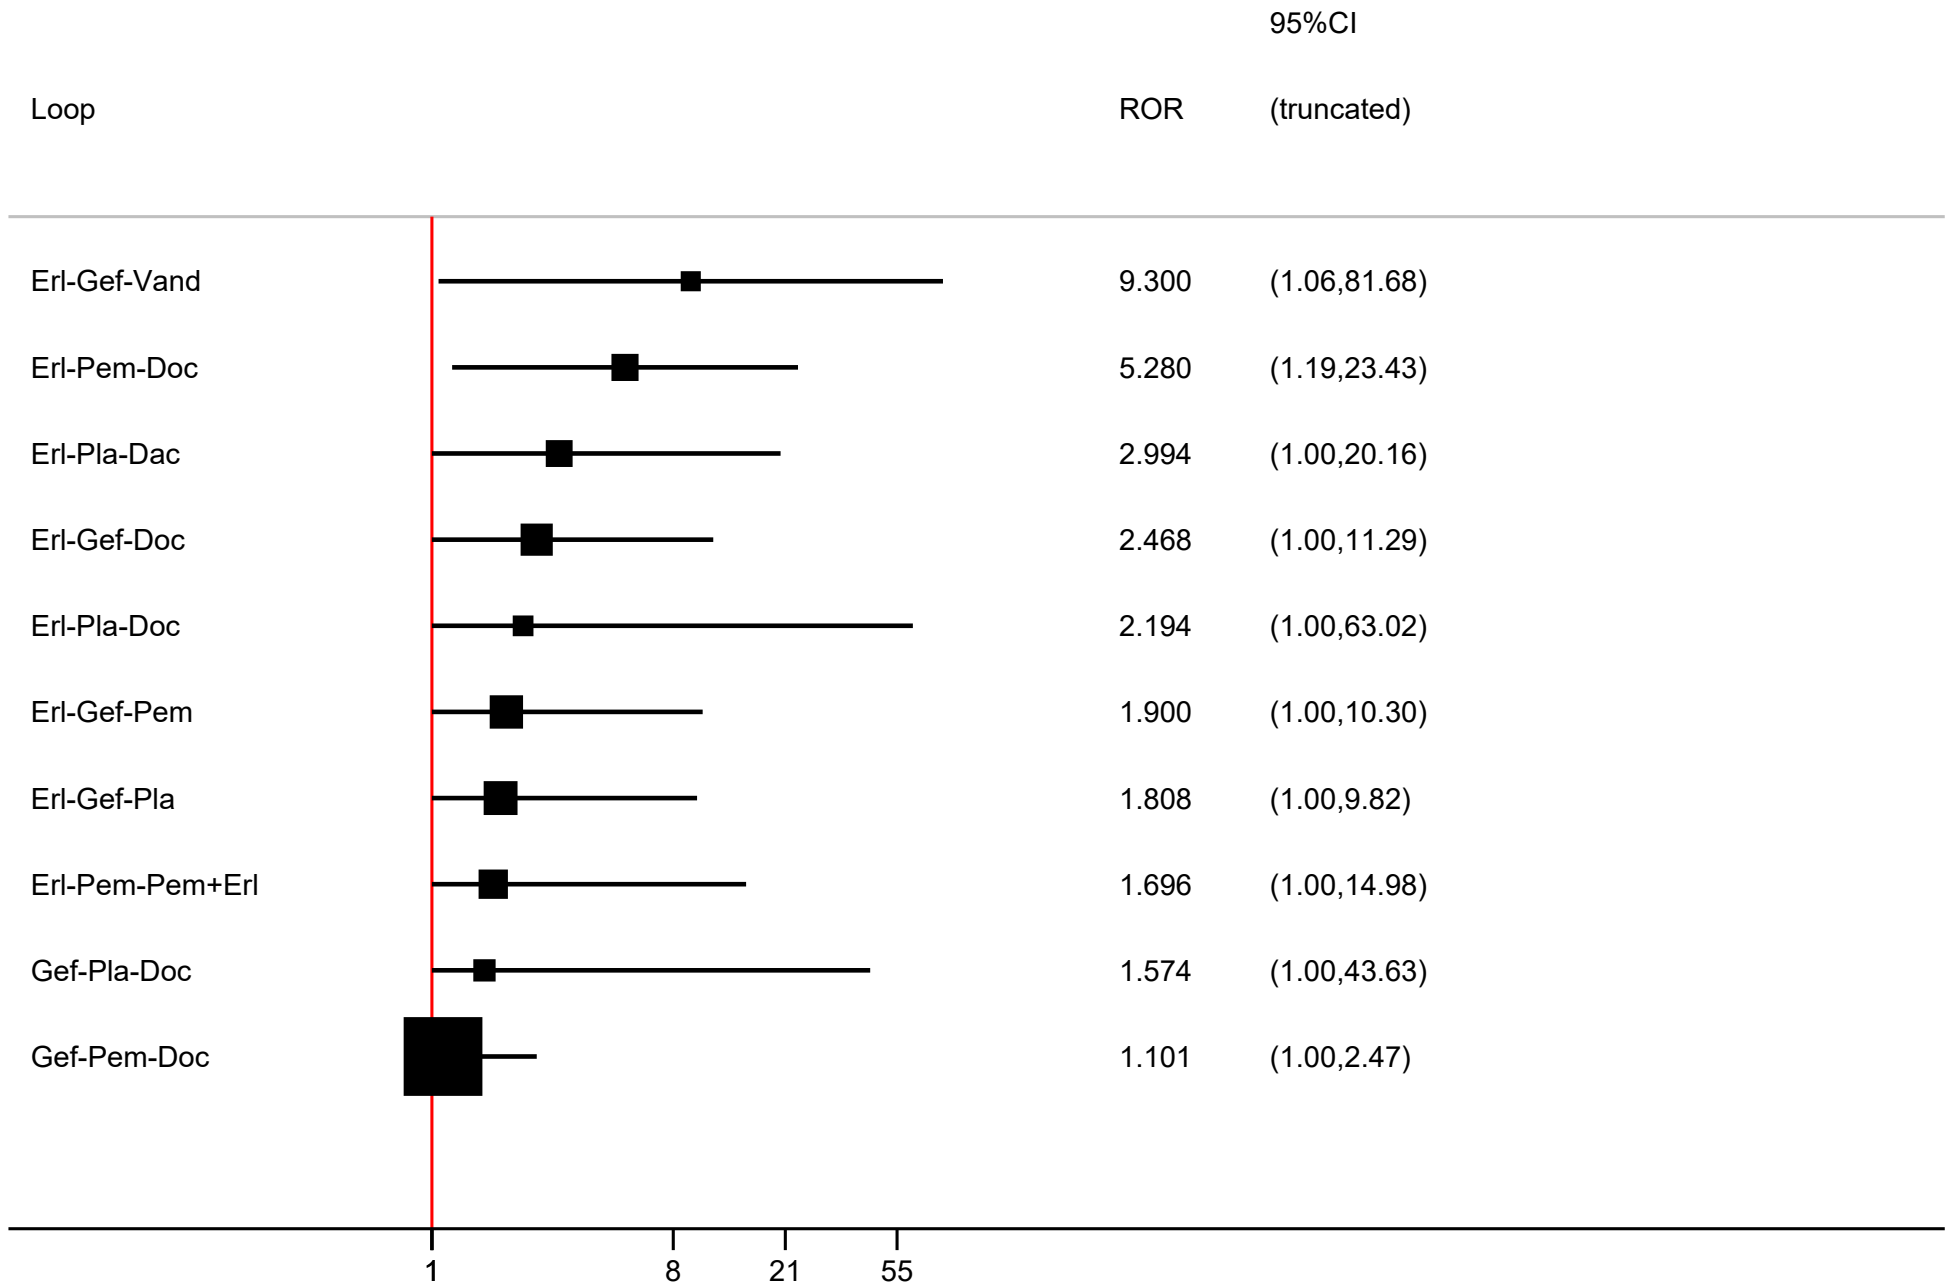

Design-by-treatment interaction model p-value=0.07

# Serious adverse events

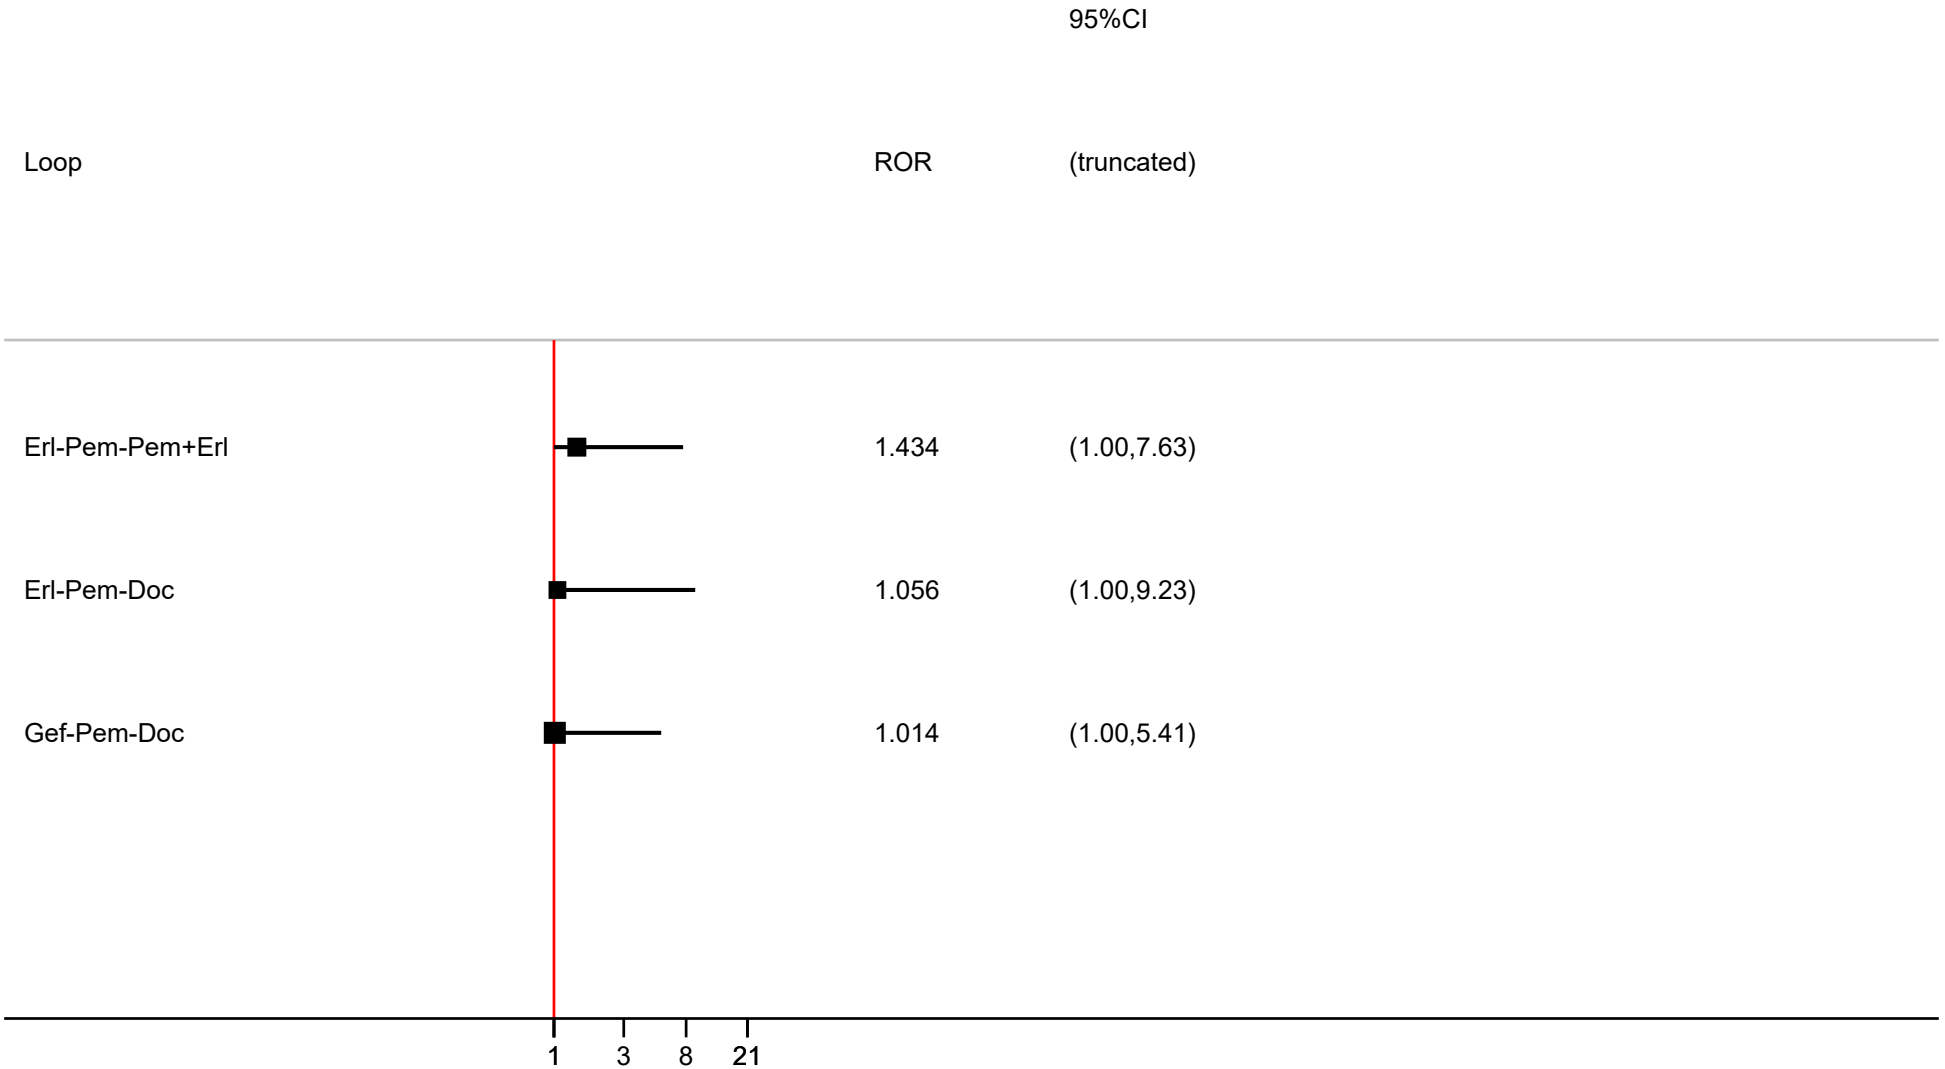

Design-by-treatment interaction model p-value=0.81

## **Appendix Figures 5: Subgroup analyses by histology and ethnicity: network graphs of trials for OS, forest plots and SUCRA values for OS and PFS**

For each network, we have included both:

- trials performed in a specific subtype of population (i.e., including only asian population, only squamous cell carcinoma, or only nonsquamous)
- trials providing results from subgroup analyses either for asian, squamous or nonsquamous population.

# Nonsquamous population

36 trials (21 081 patients)

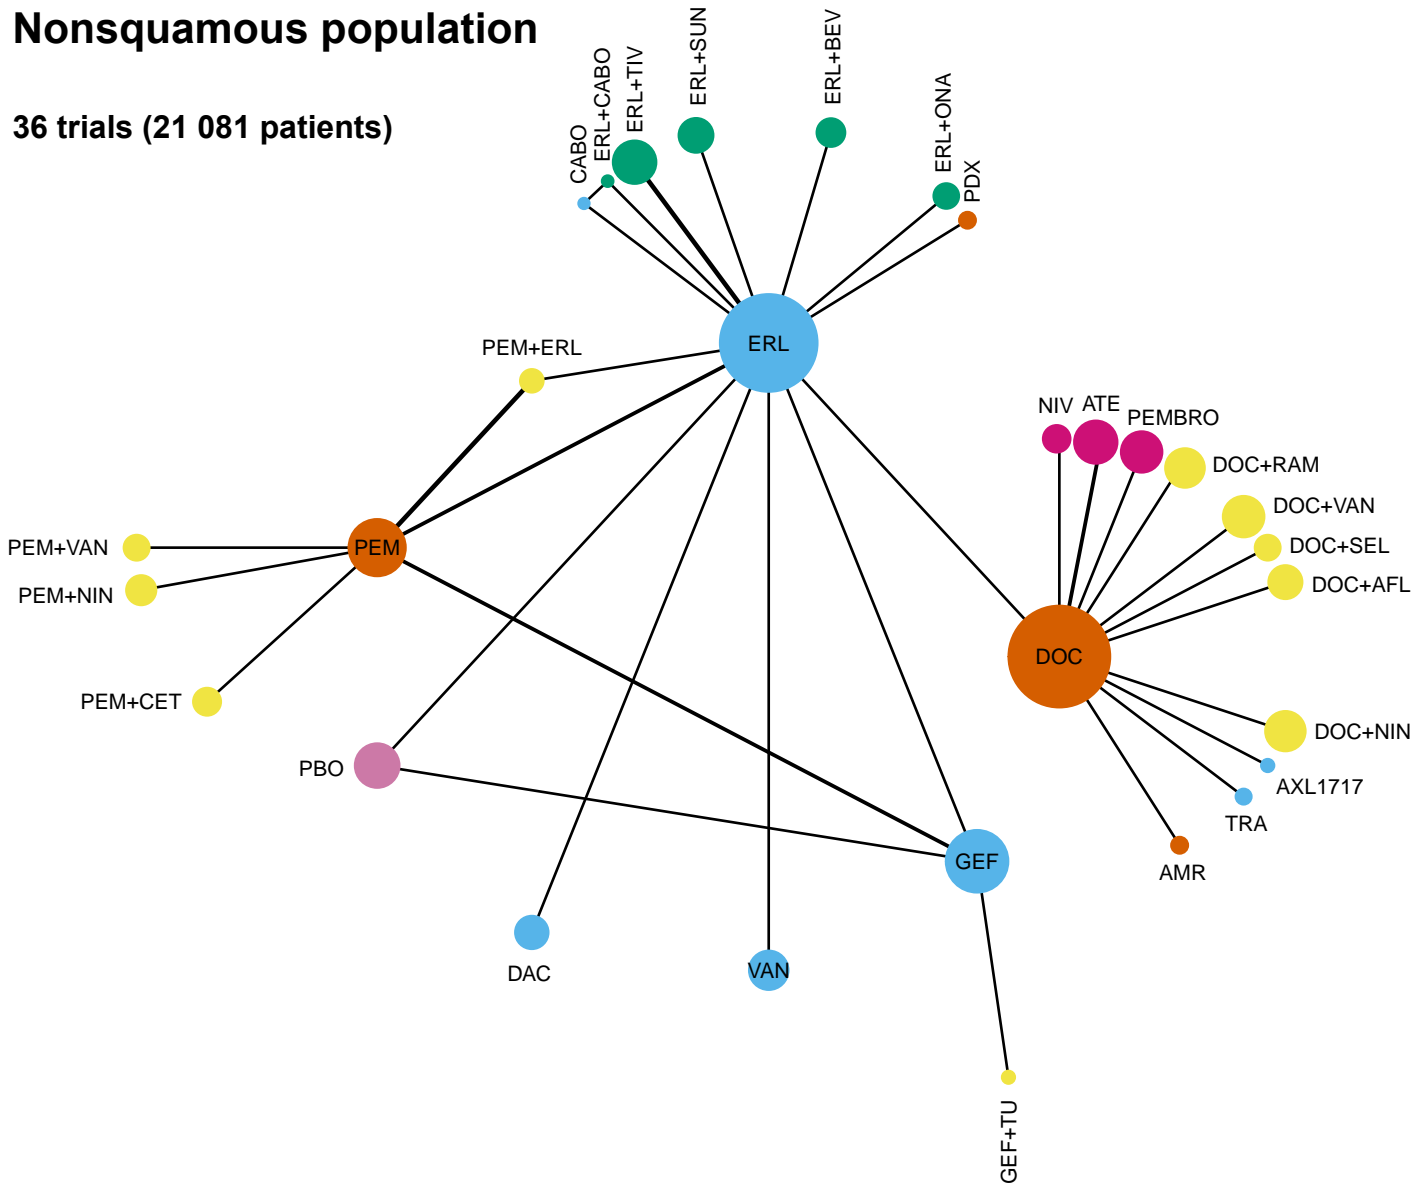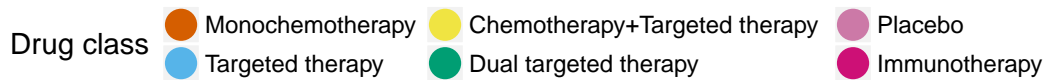

# Squamous population

23 trials (15 543 patients)

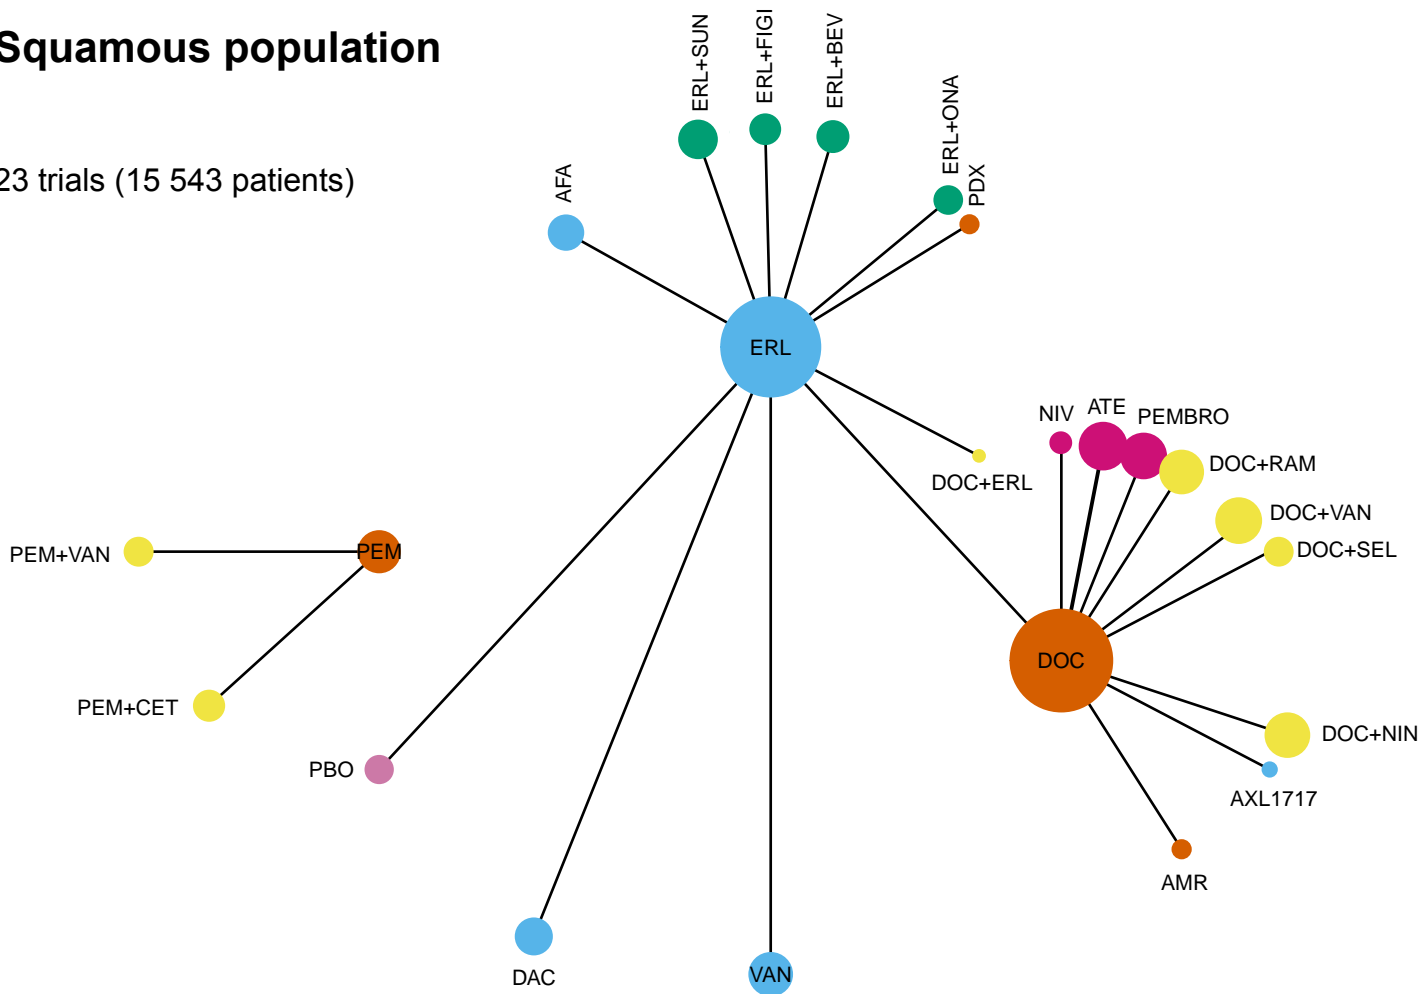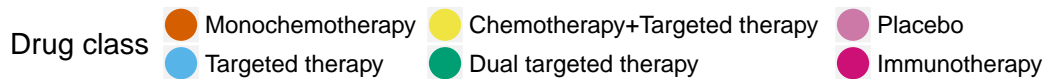



# Asian population

31 trials (14331patients)

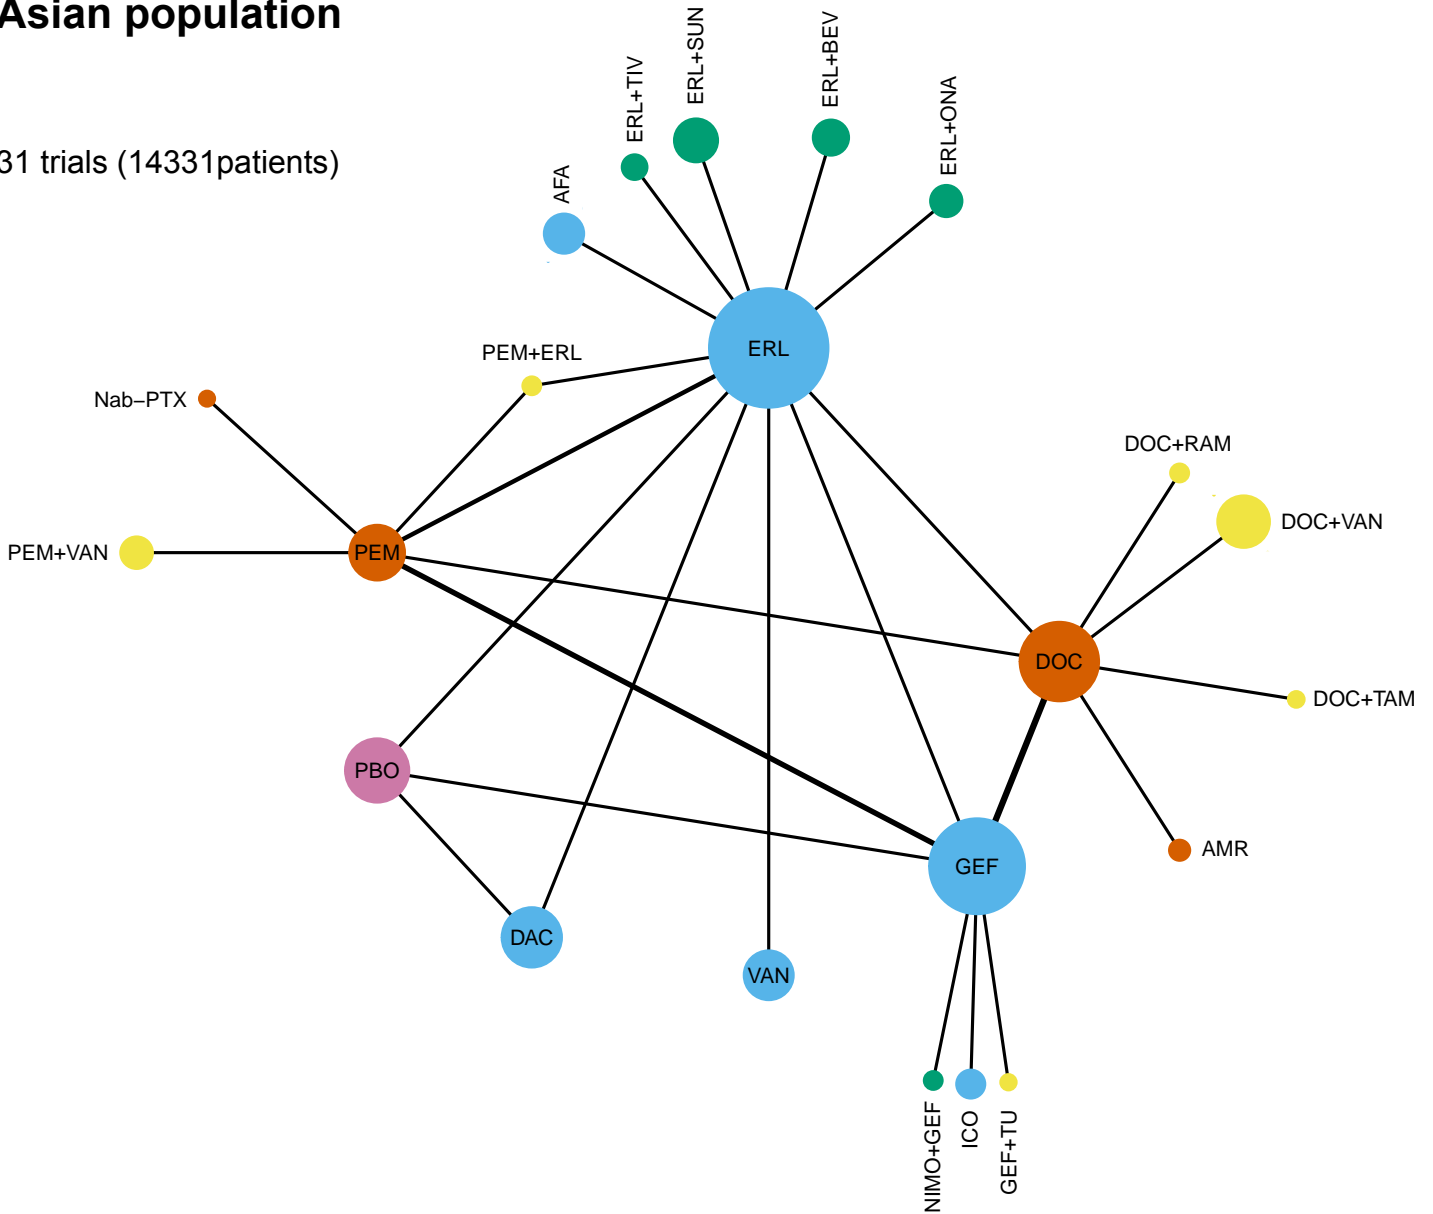

Drug class

- Orange circle: Monochemotherapy
- Yellow circle: Chemotherapy+Targeted therapy
- Pink circle: Placebo
- Blue circle: Targeted therapy
- Green circle: Dual targeted therapy
- Magenta circle: Immunotherapy

**Comparison**

**Overall Survival**

**HR (95% CrI)**

*Favors first treatment* ←      → *Favors second treatment*

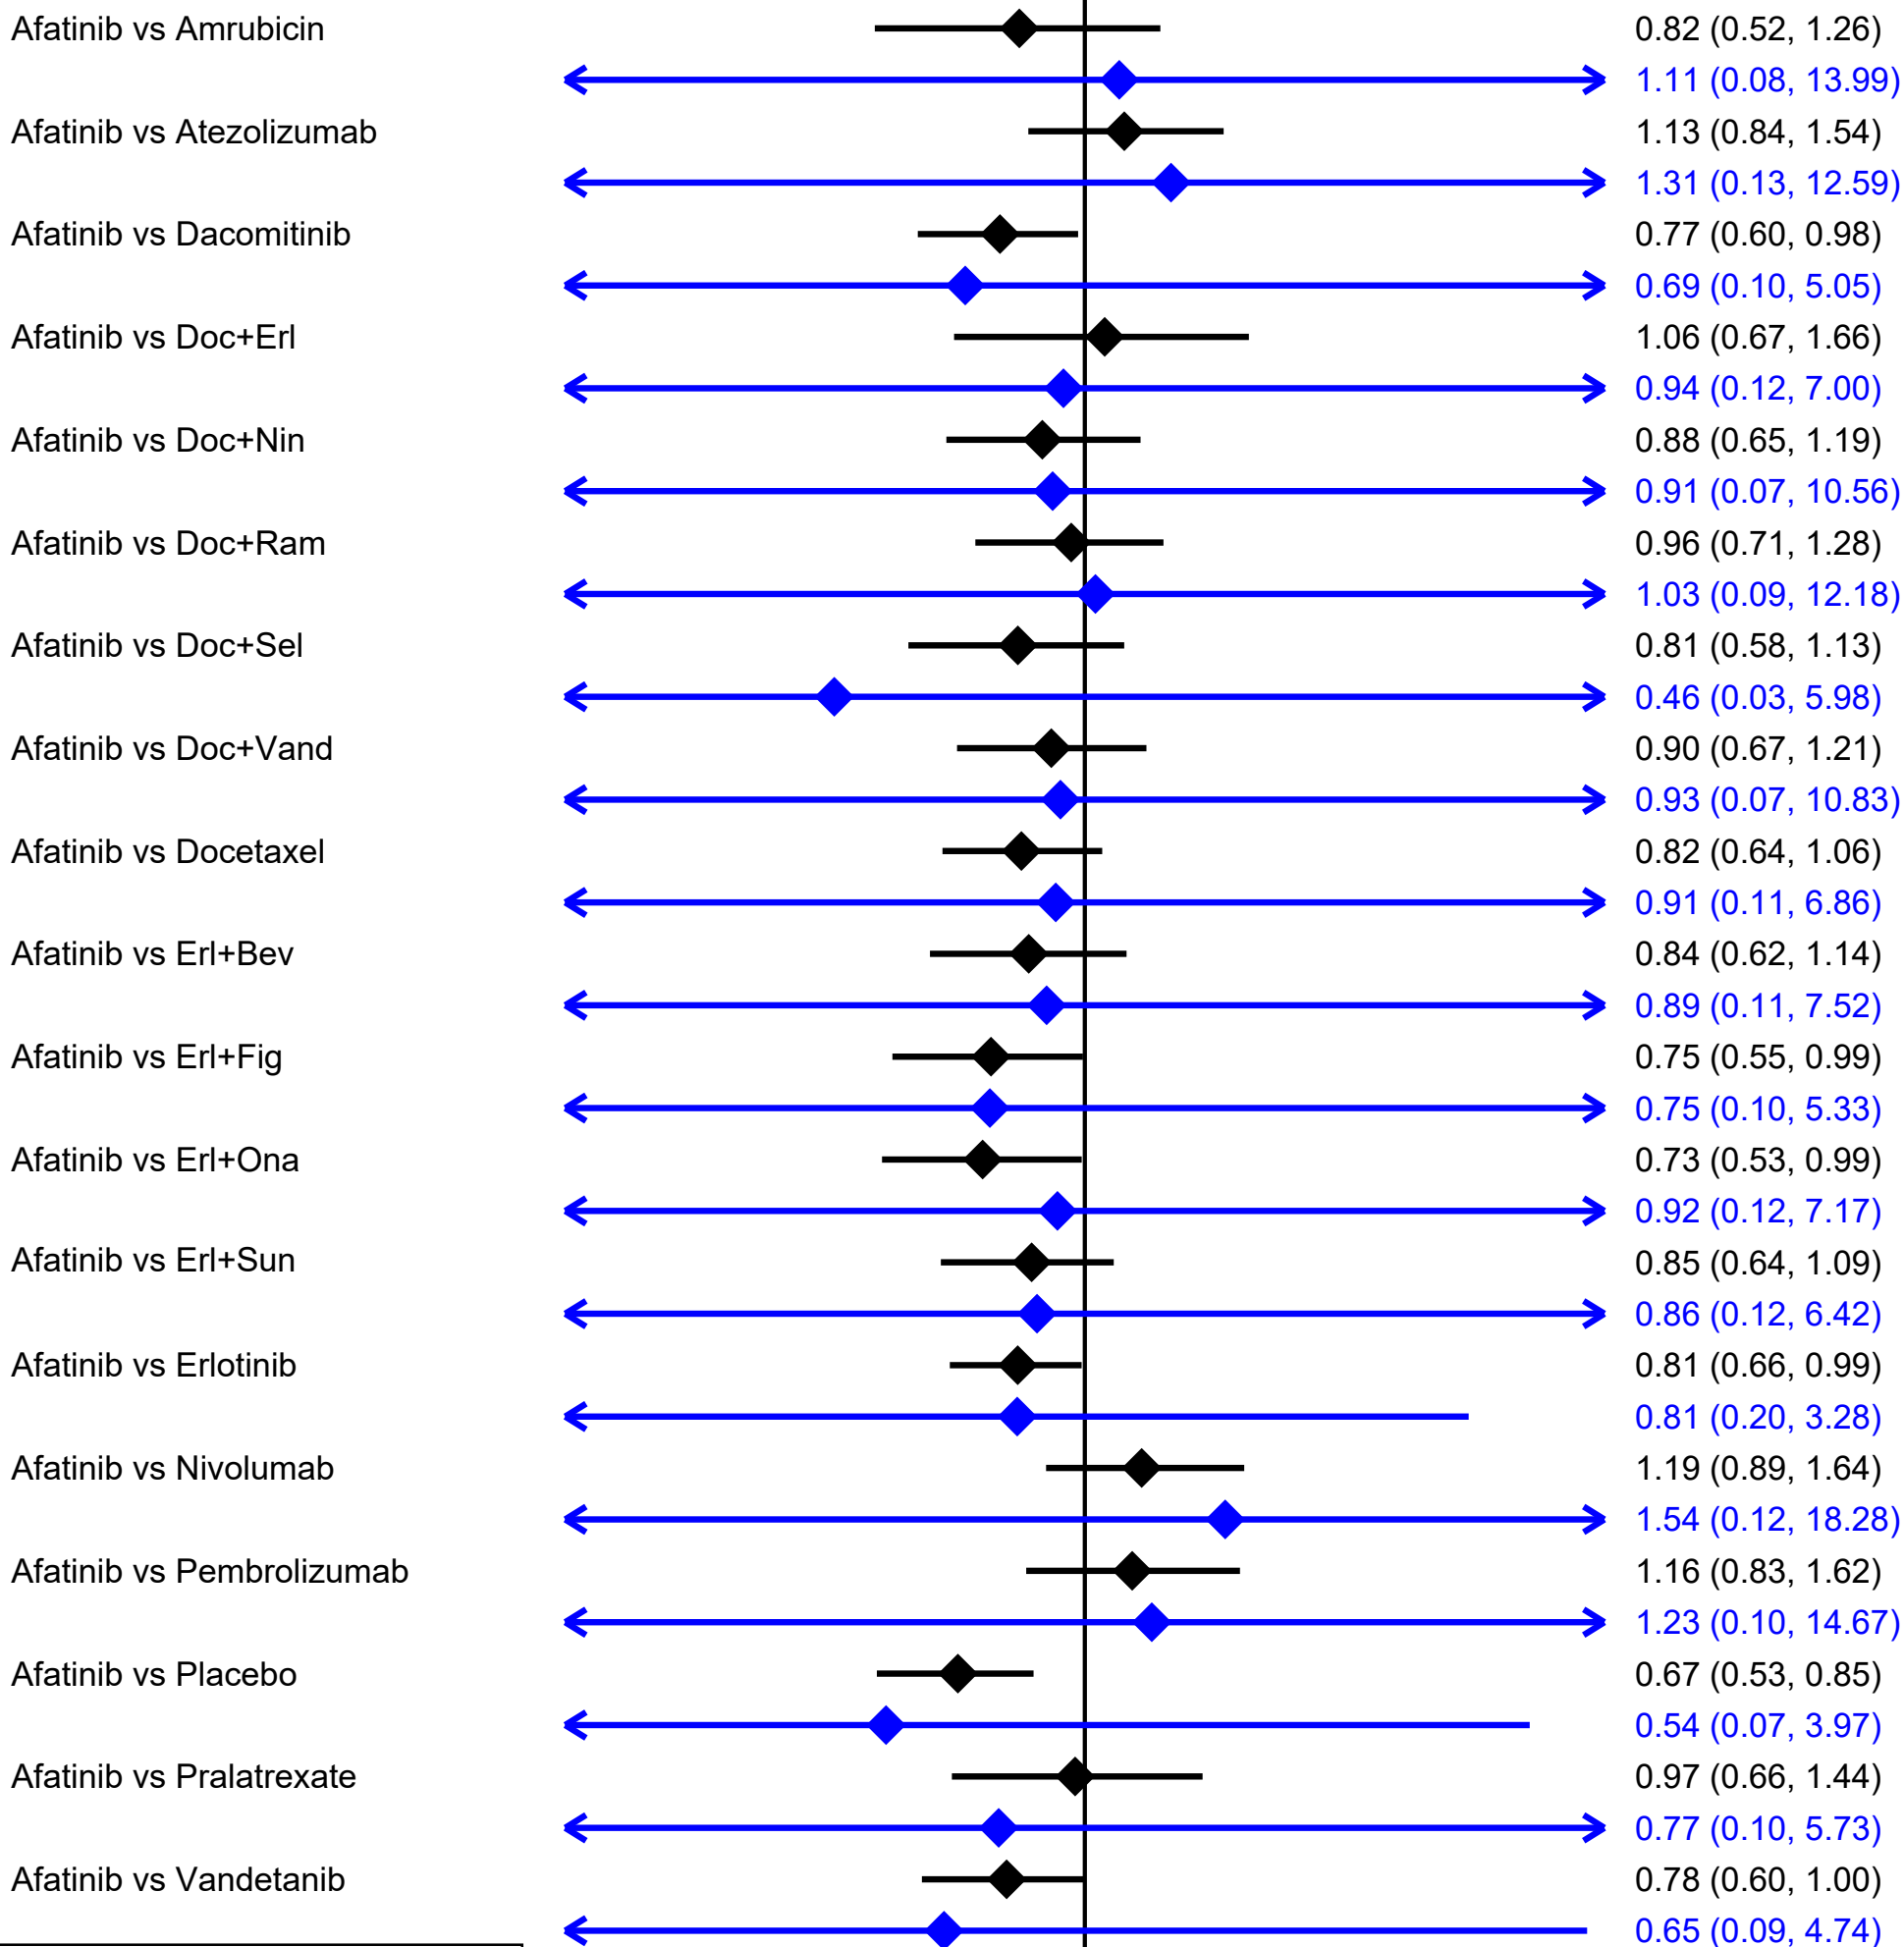

— Total population  
— Only squamous population  
— Only non-squamous population

.2      .3      .5      1      2      5

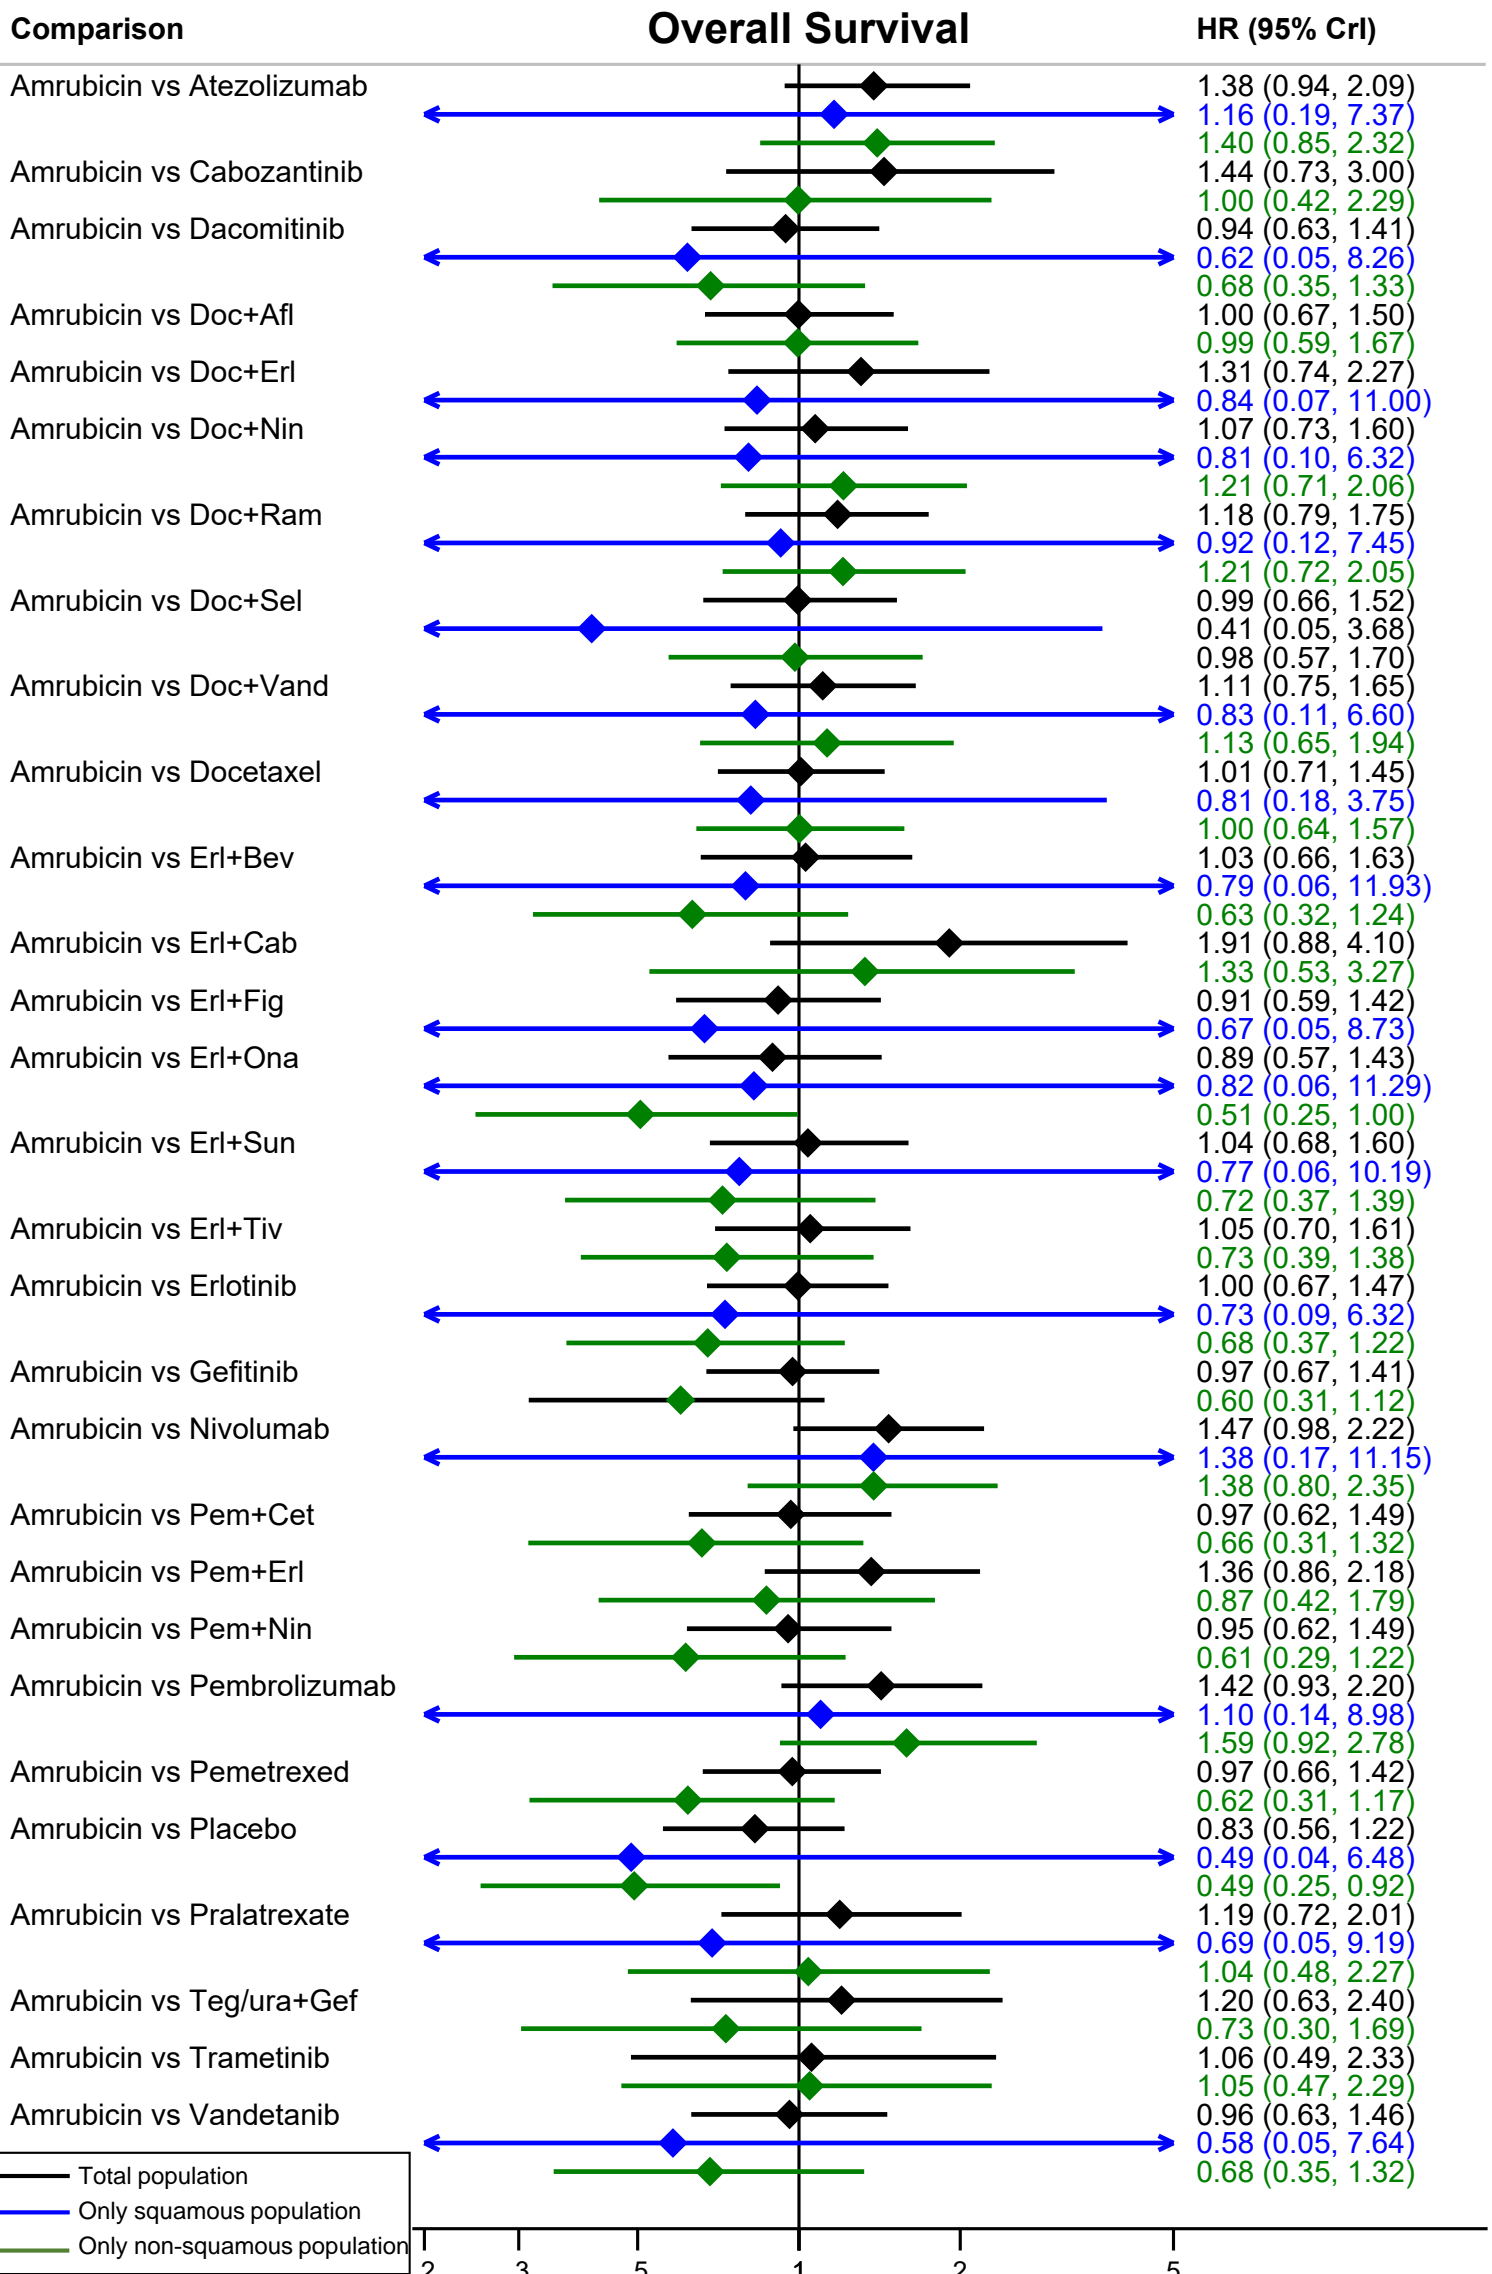

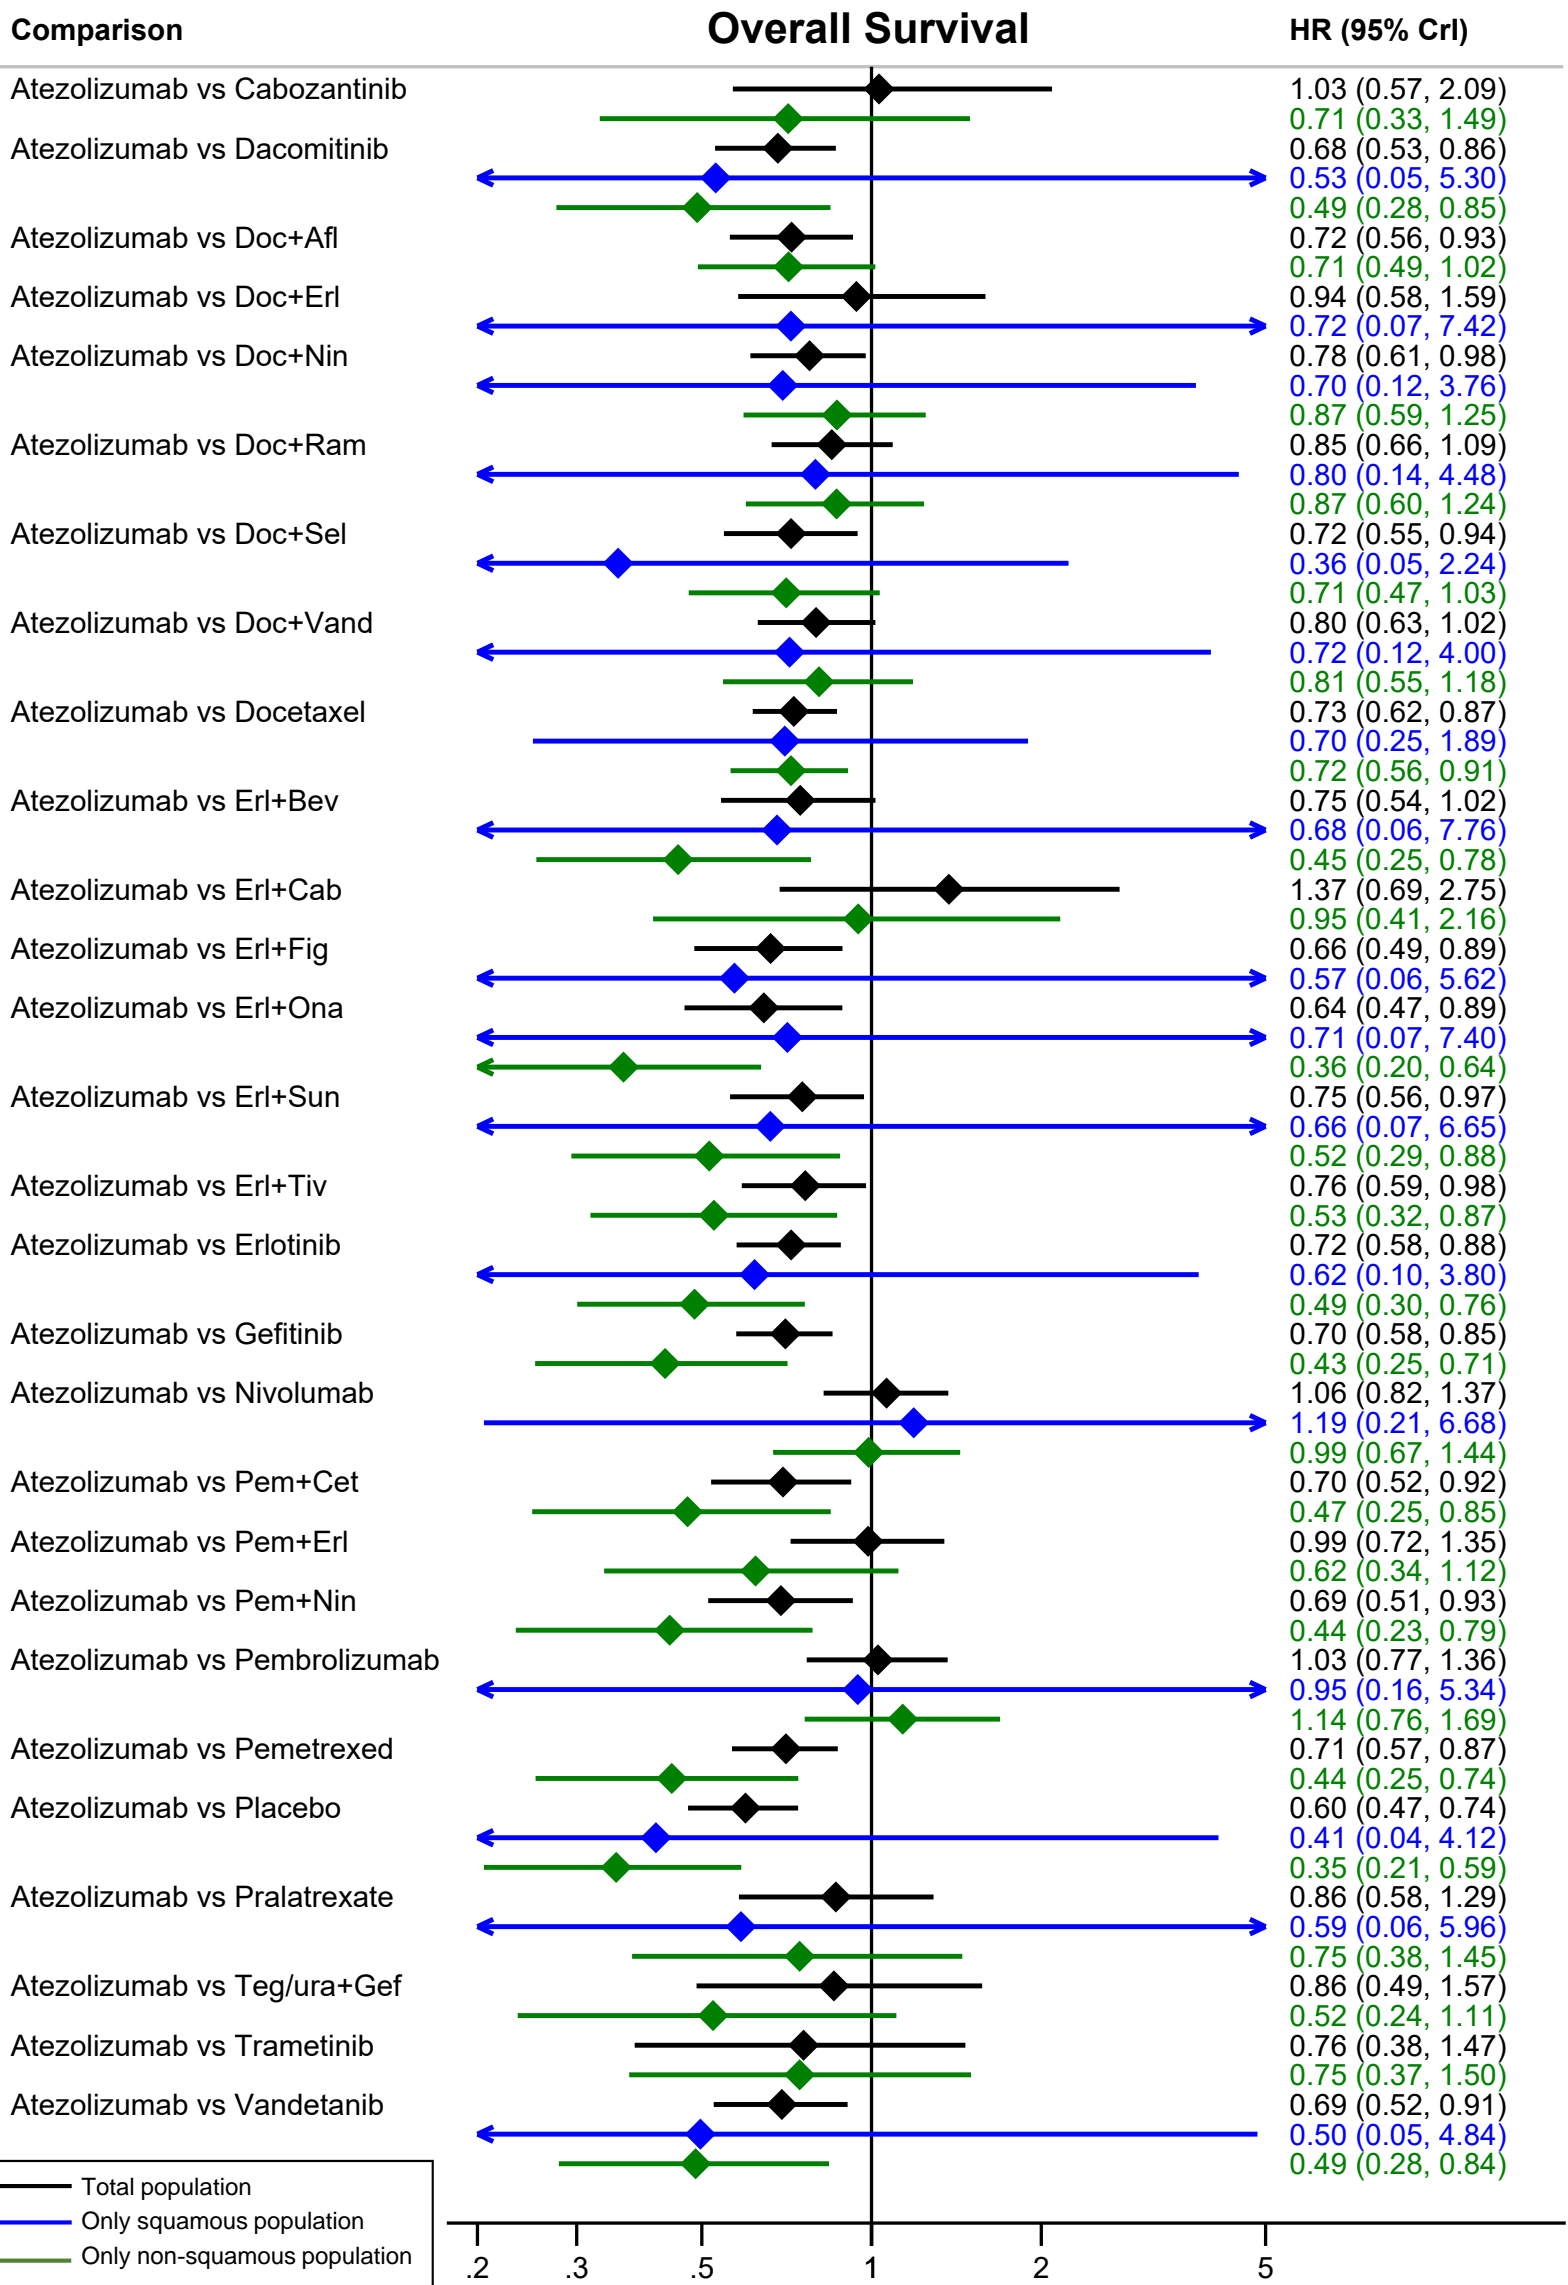

**Comparison**

**Overall Survival**

**HR (95% CrI)**

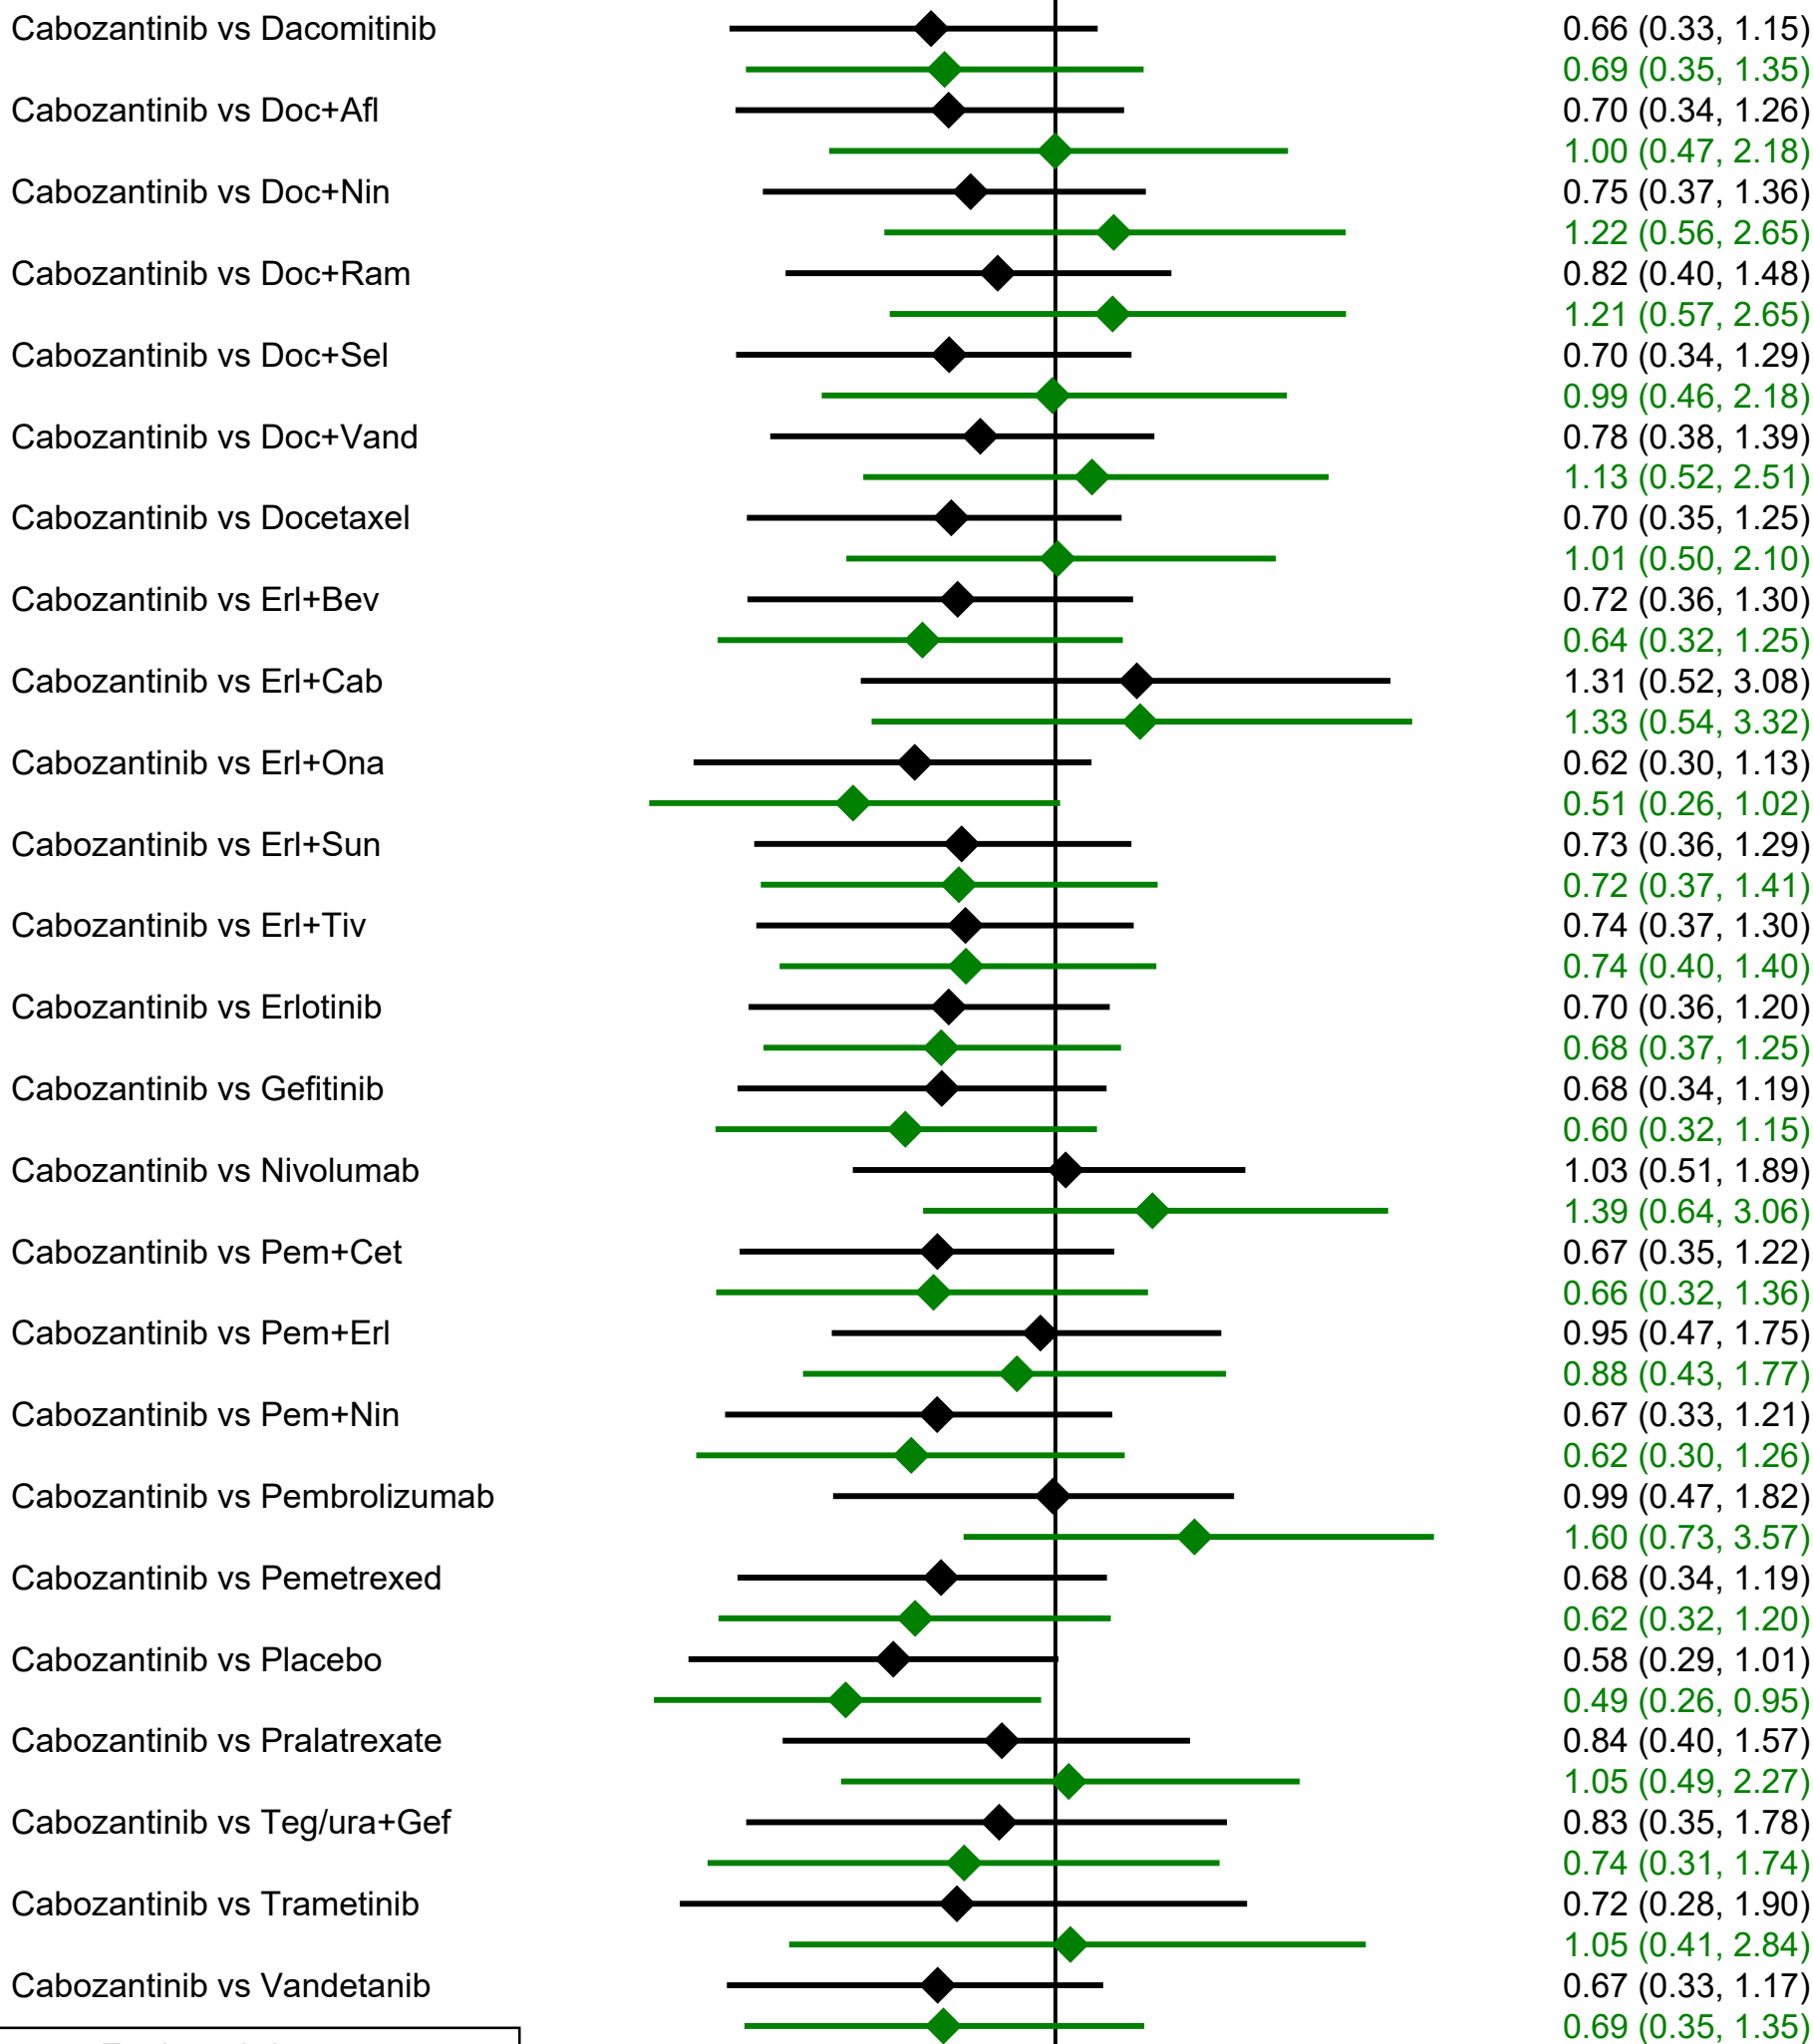

— Total population  
— Only squamous population  
— Only non-squamous population

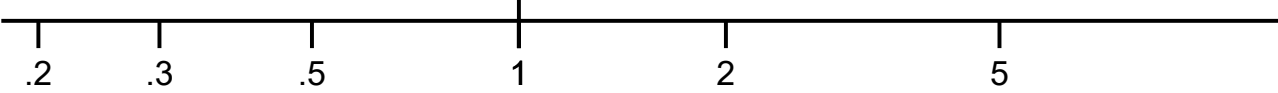

**Comparison**

**Overall Survival**

**HR (95% CrI)**

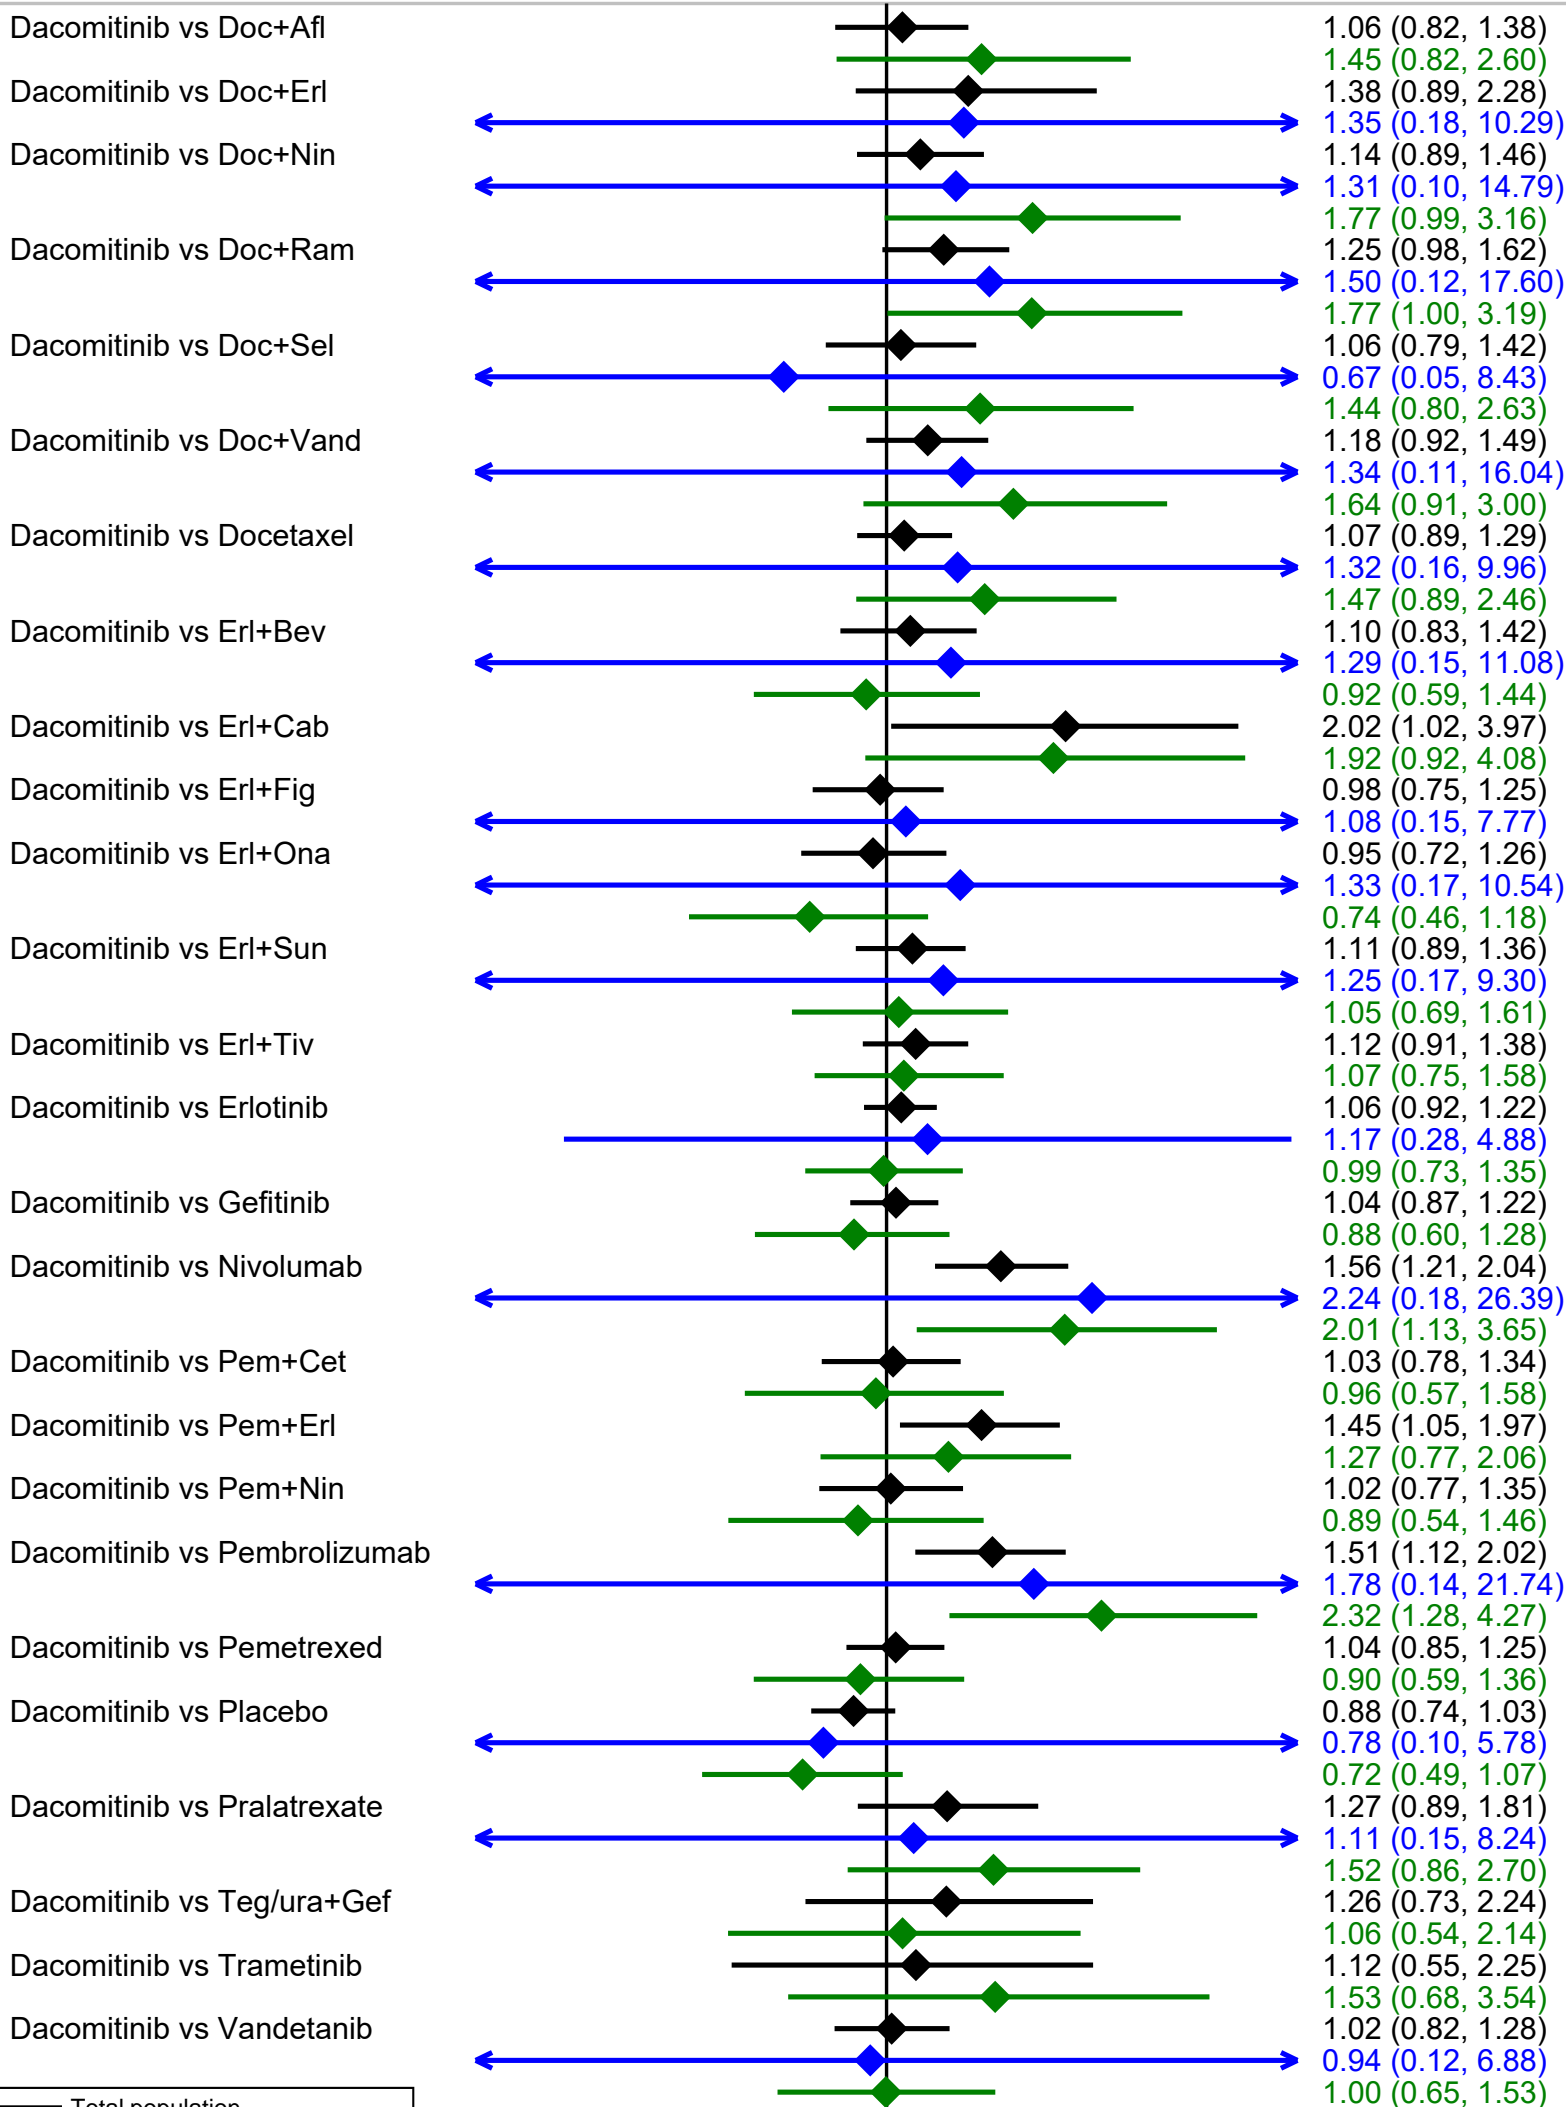

— Total population  
— Only squamous population  
— Only non-squamous population

— 0.2 0.3 0.5 1 2 5

# Comparison

# Overall Survival

# HR (95% CrI)

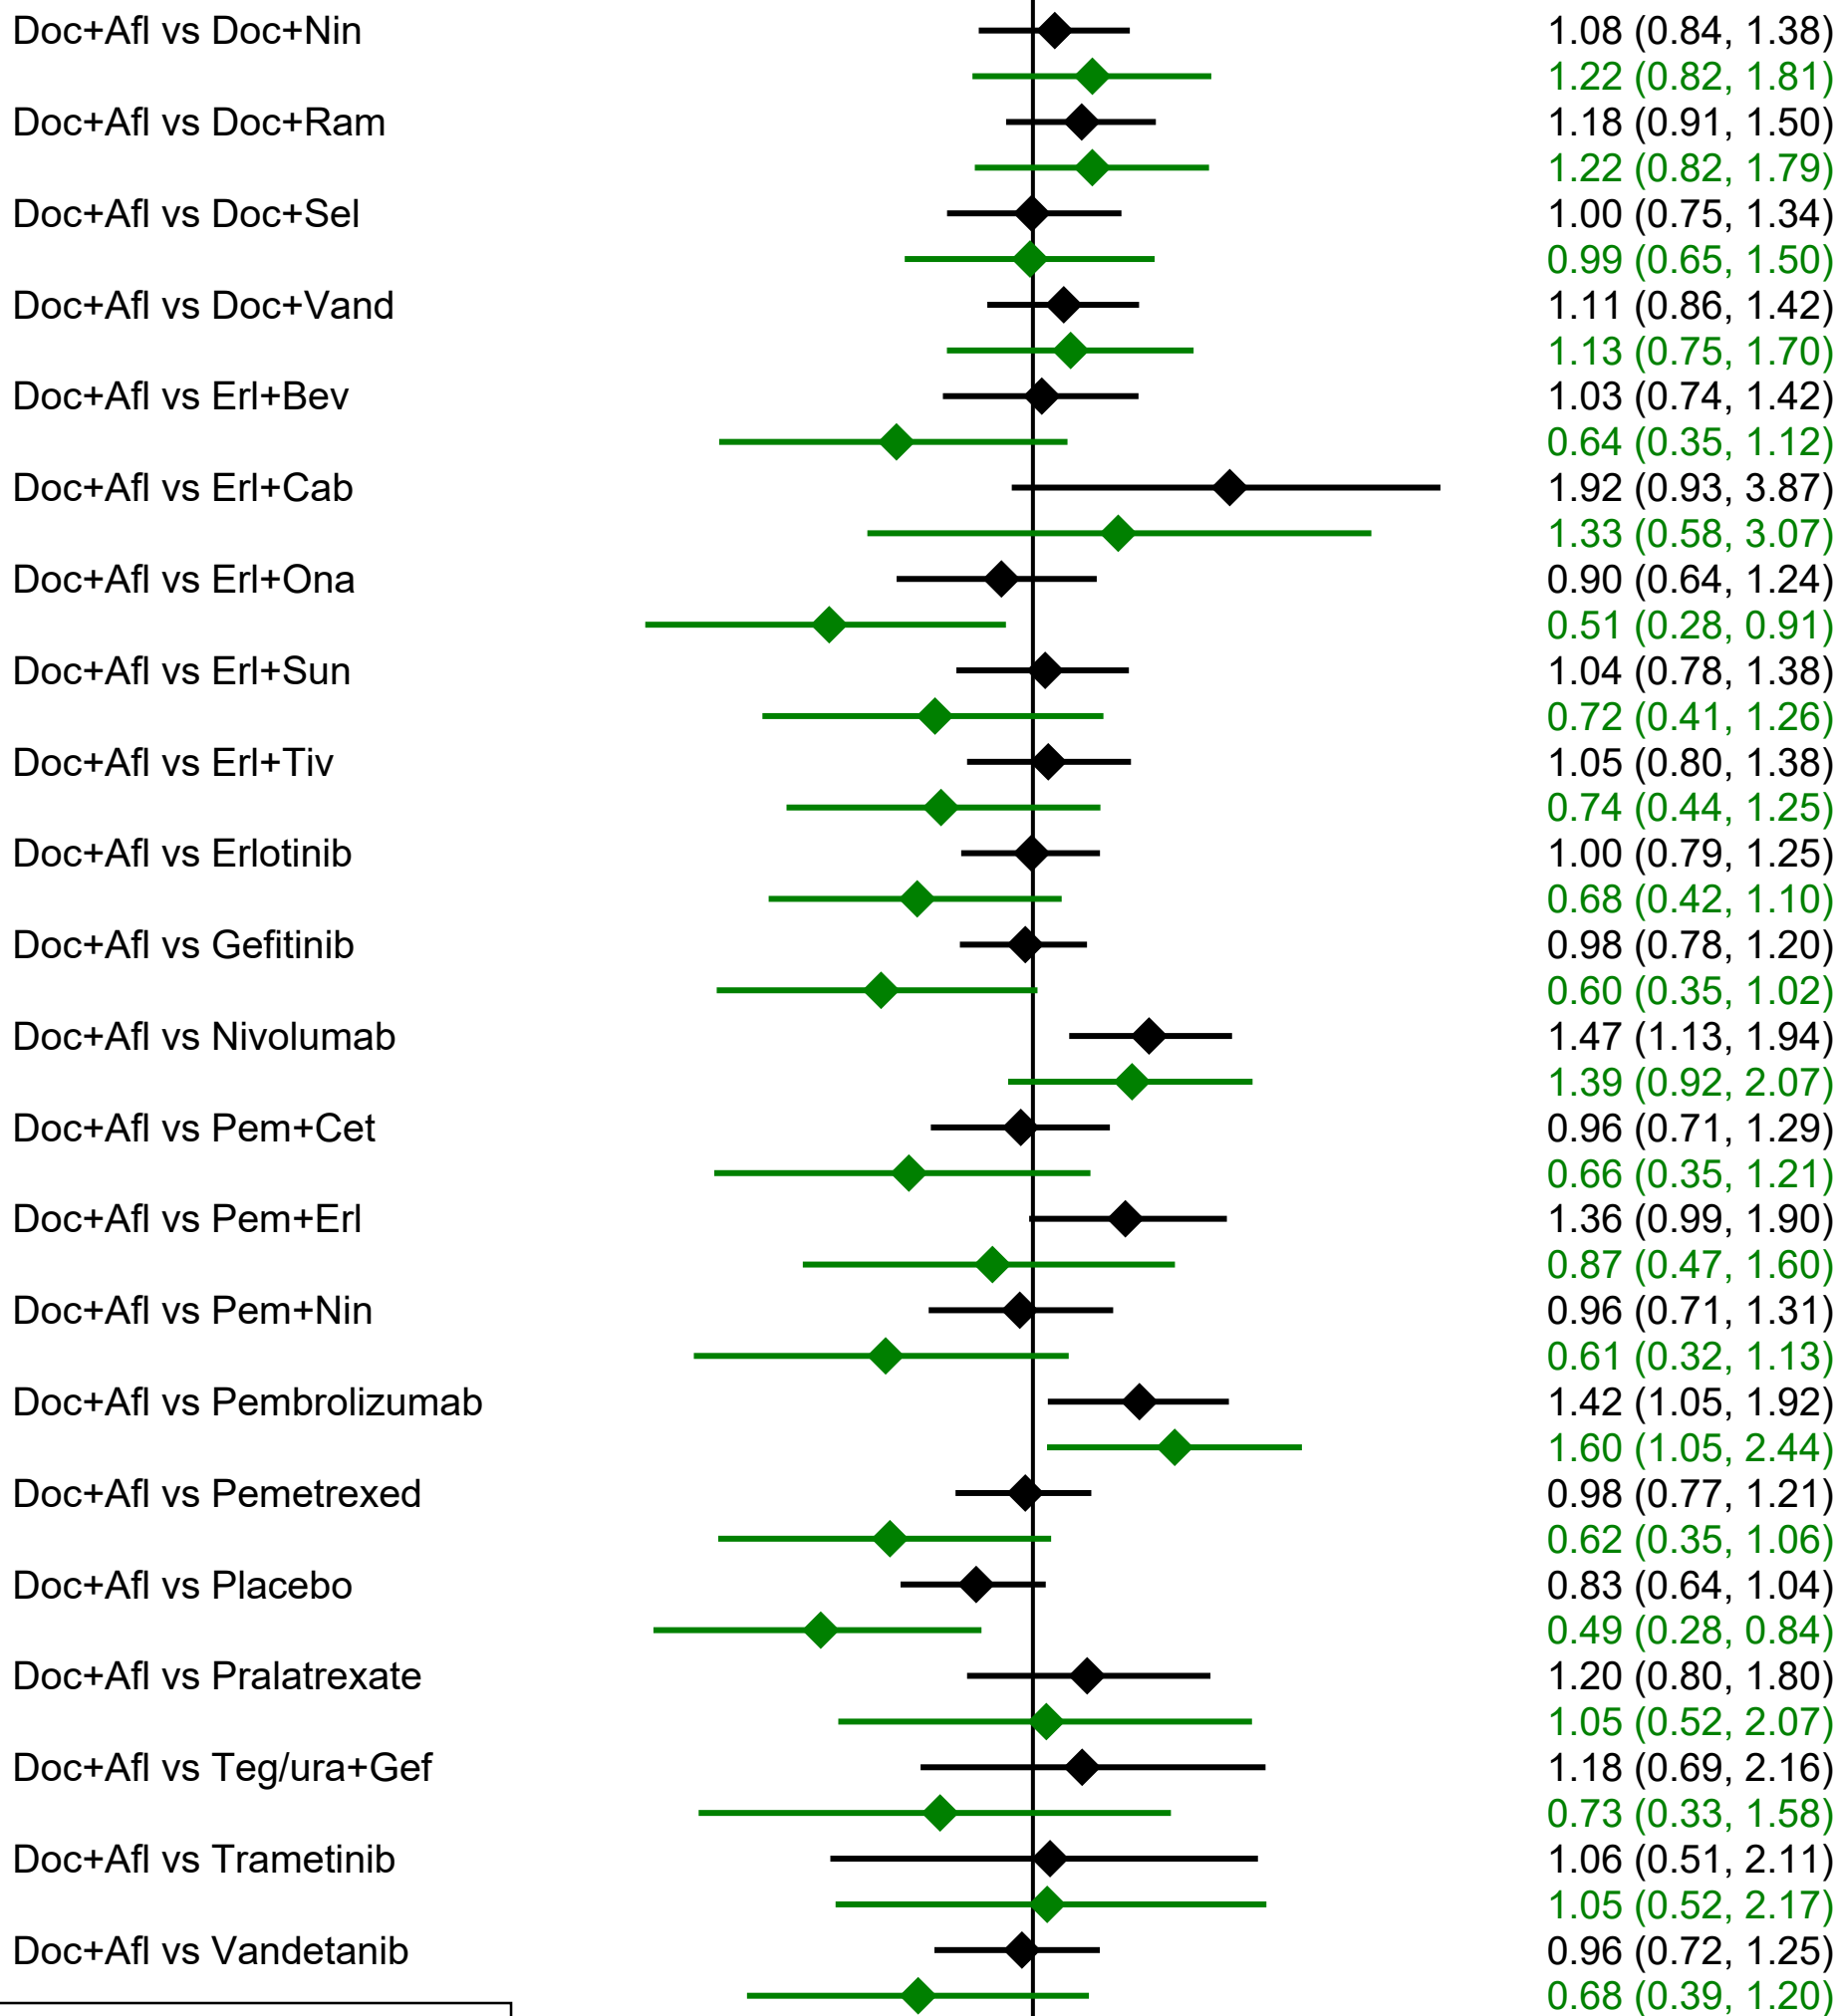

— Total population  
— Only squamous population  
— Only non-squamous population

.2 .3 .5 1 2 5

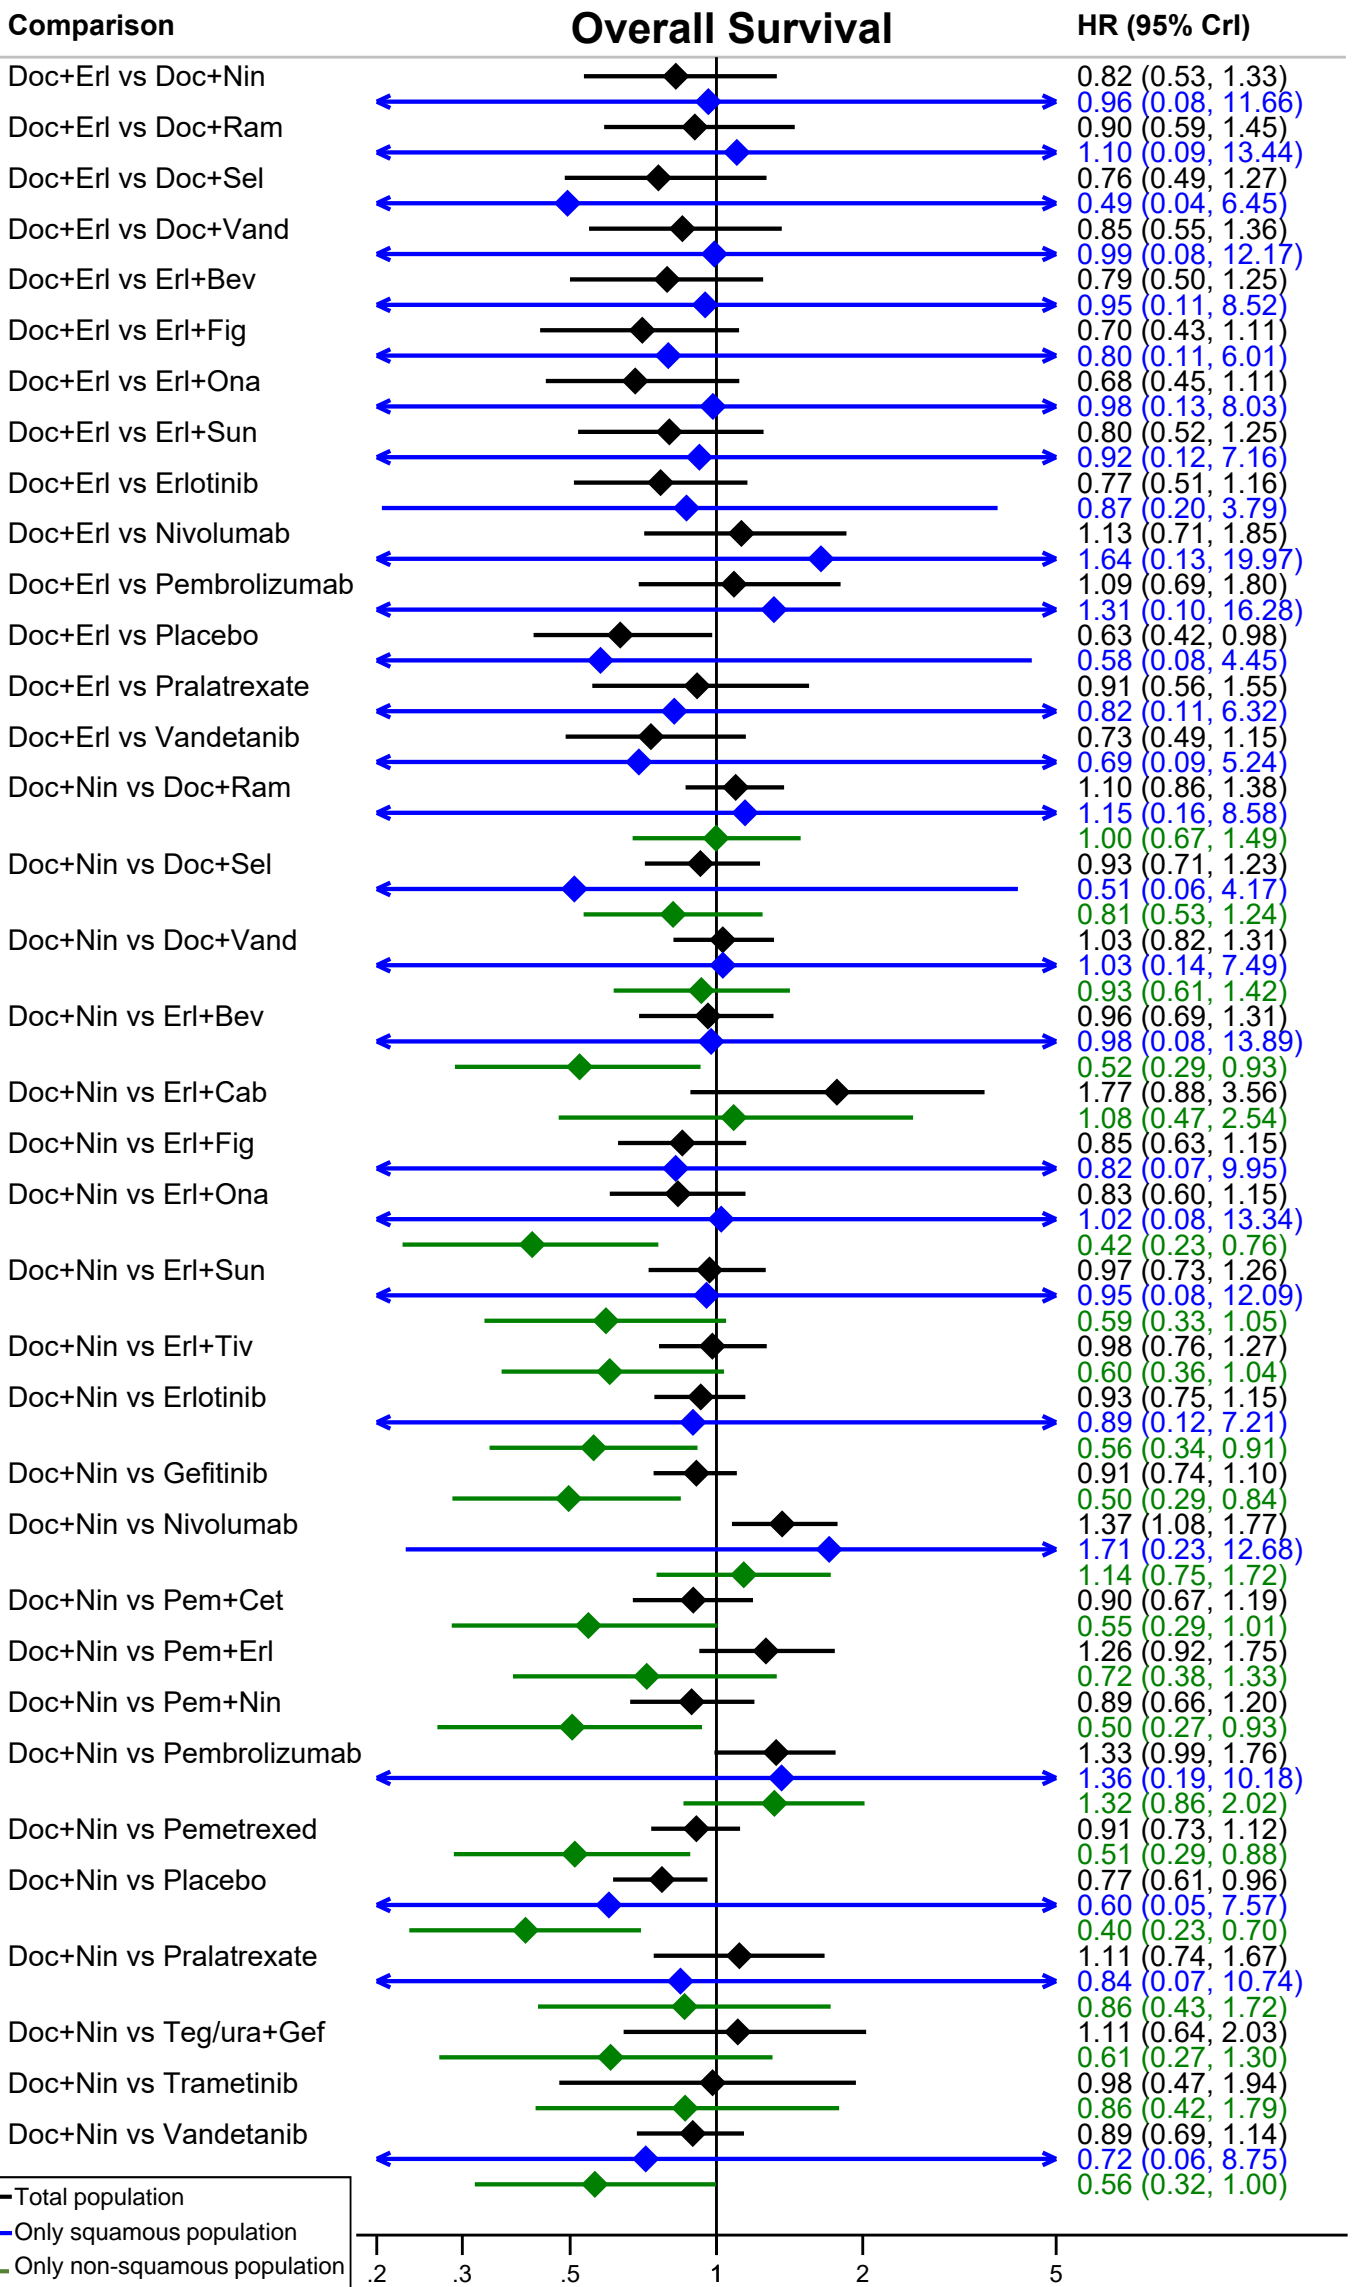

— Total population  
— Only squamous population  
— Only non-squamous population



**Comparison**

**Overall Survival**

**HR (95% CrI)**

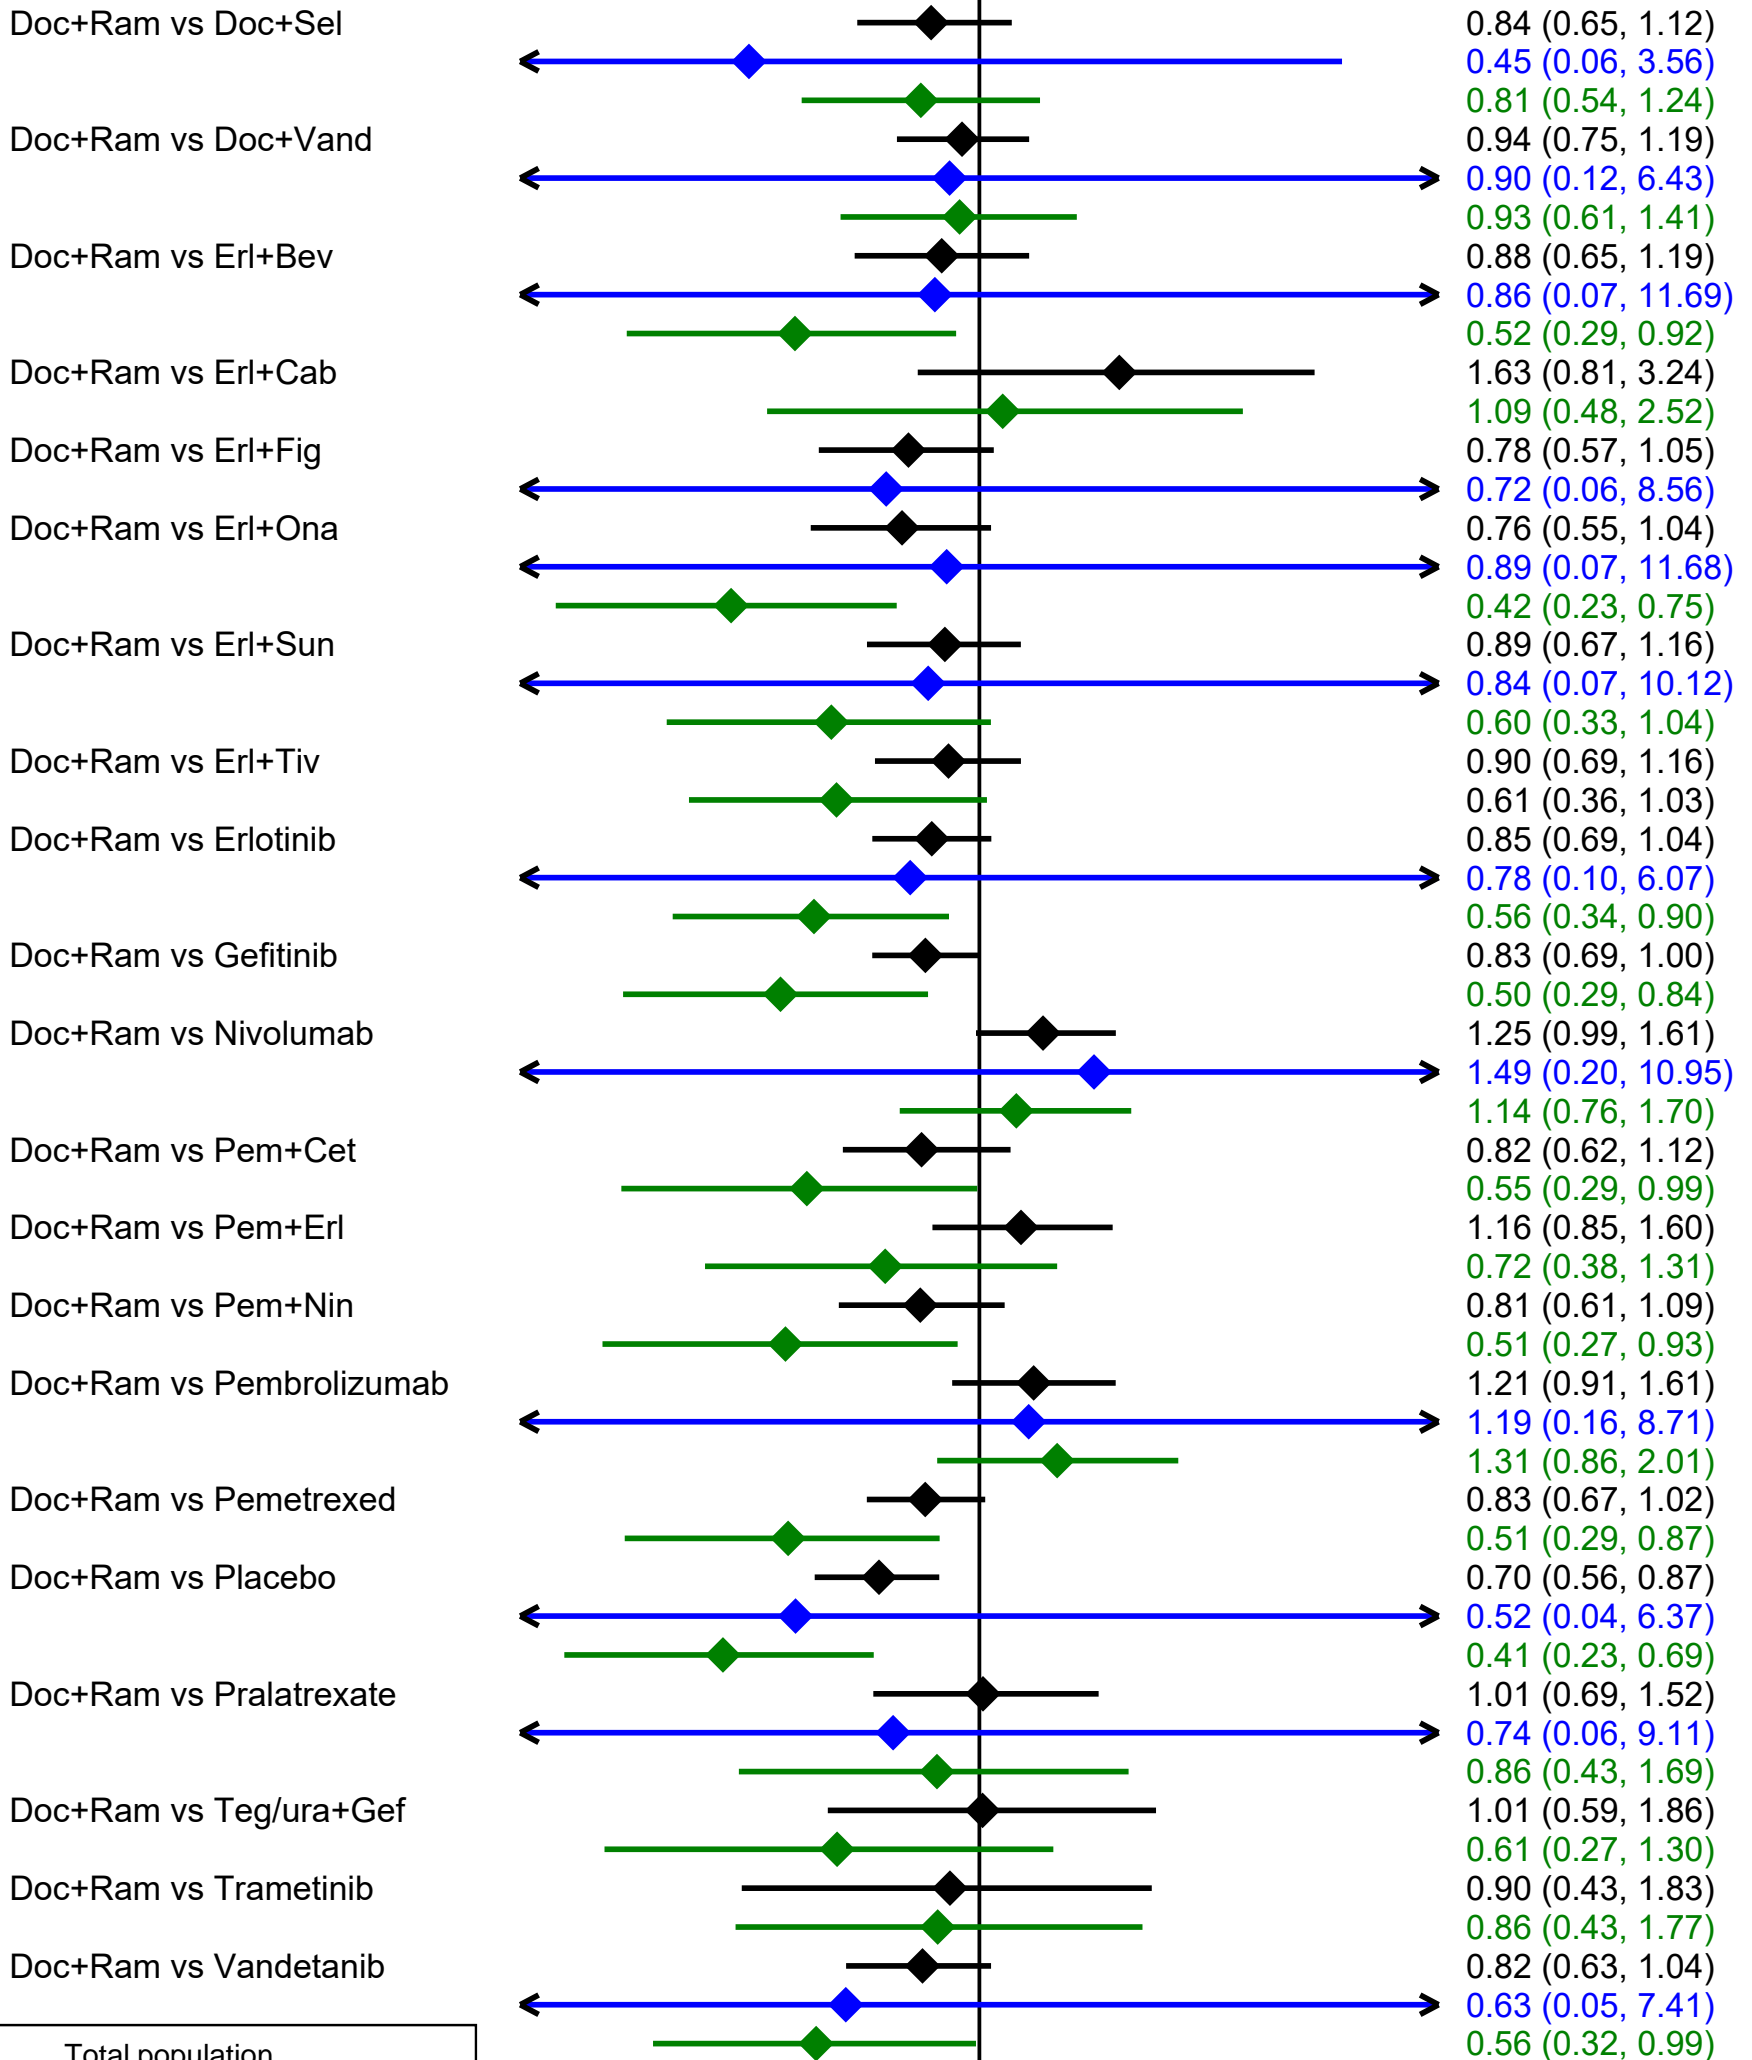

— Total population  
— Only squamous population  
— Only non-squamous population

.2 .3 .5 1 2 5

**Comparison**

**Overall Survival**

**HR (95% CrI)**

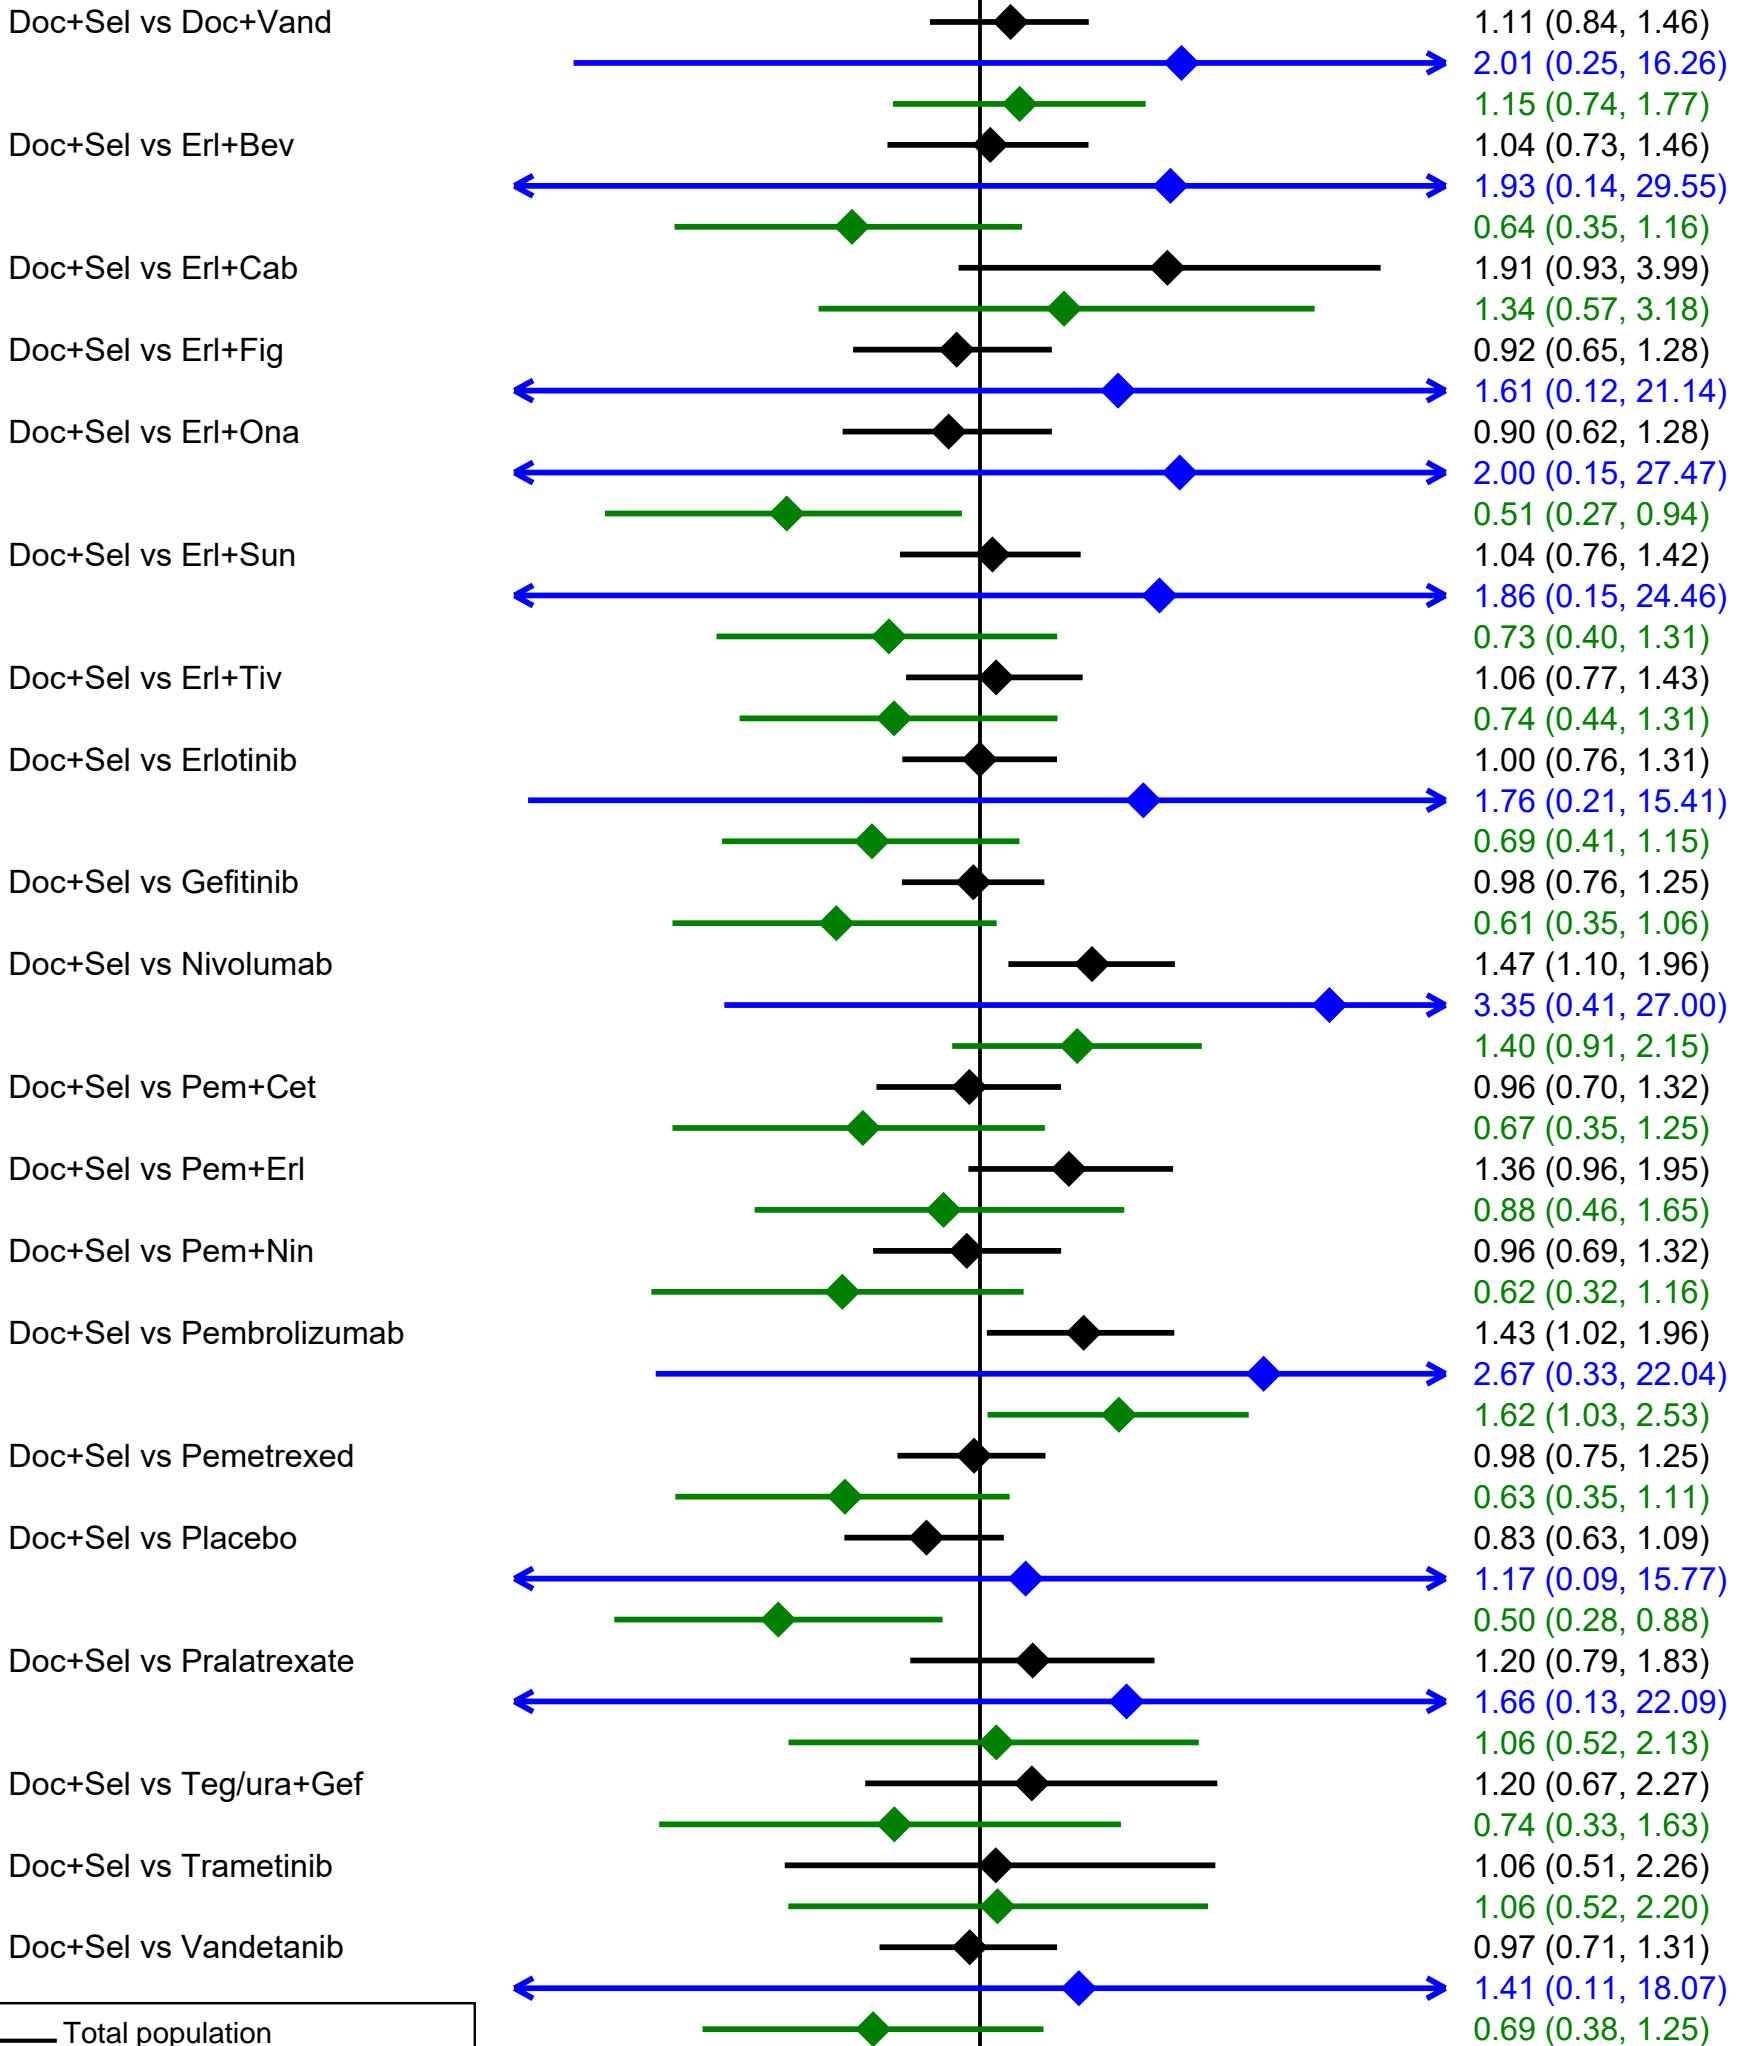

— Total population  
— Only squamous population  
— Only non-squamous population

.2 .3 .5 1 2 5

**Comparison**

**Overall Survival**

**HR (95% CrI)**

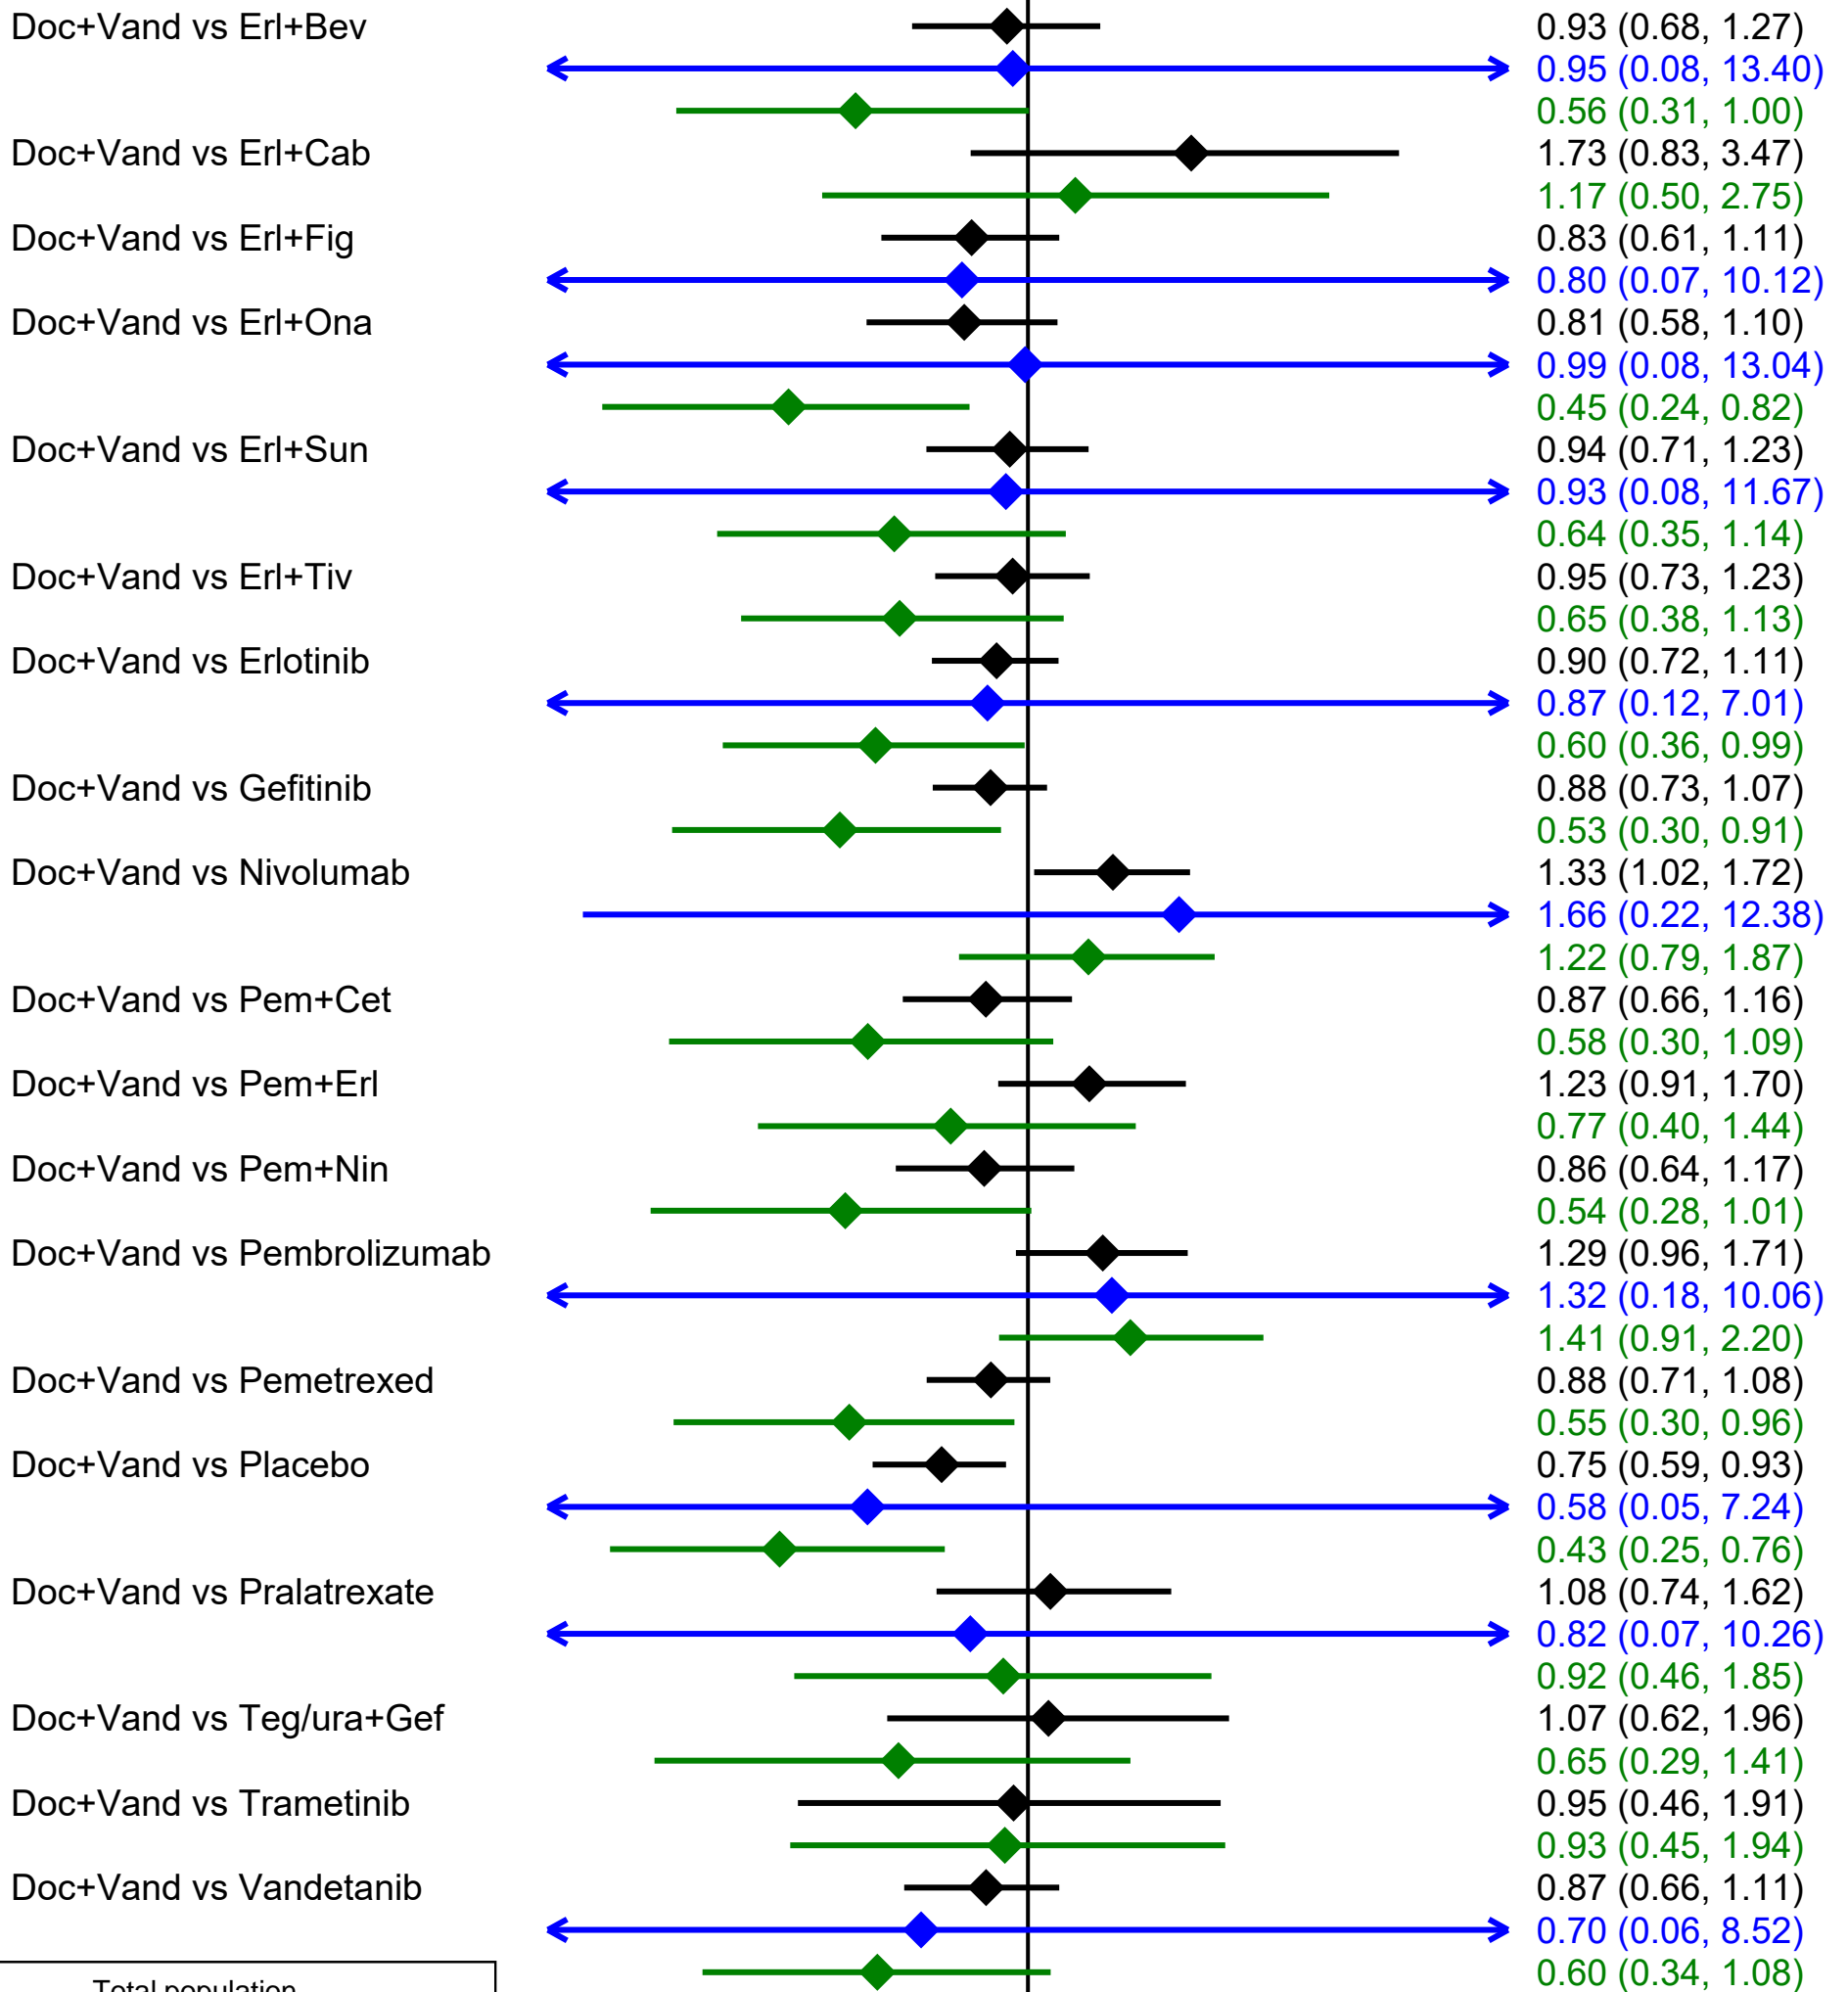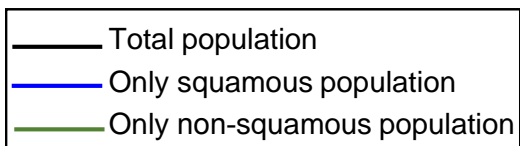

.2 .3 .5 1 2 5

**Comparison**

**Overall Survival**

**HR (95% CrI)**

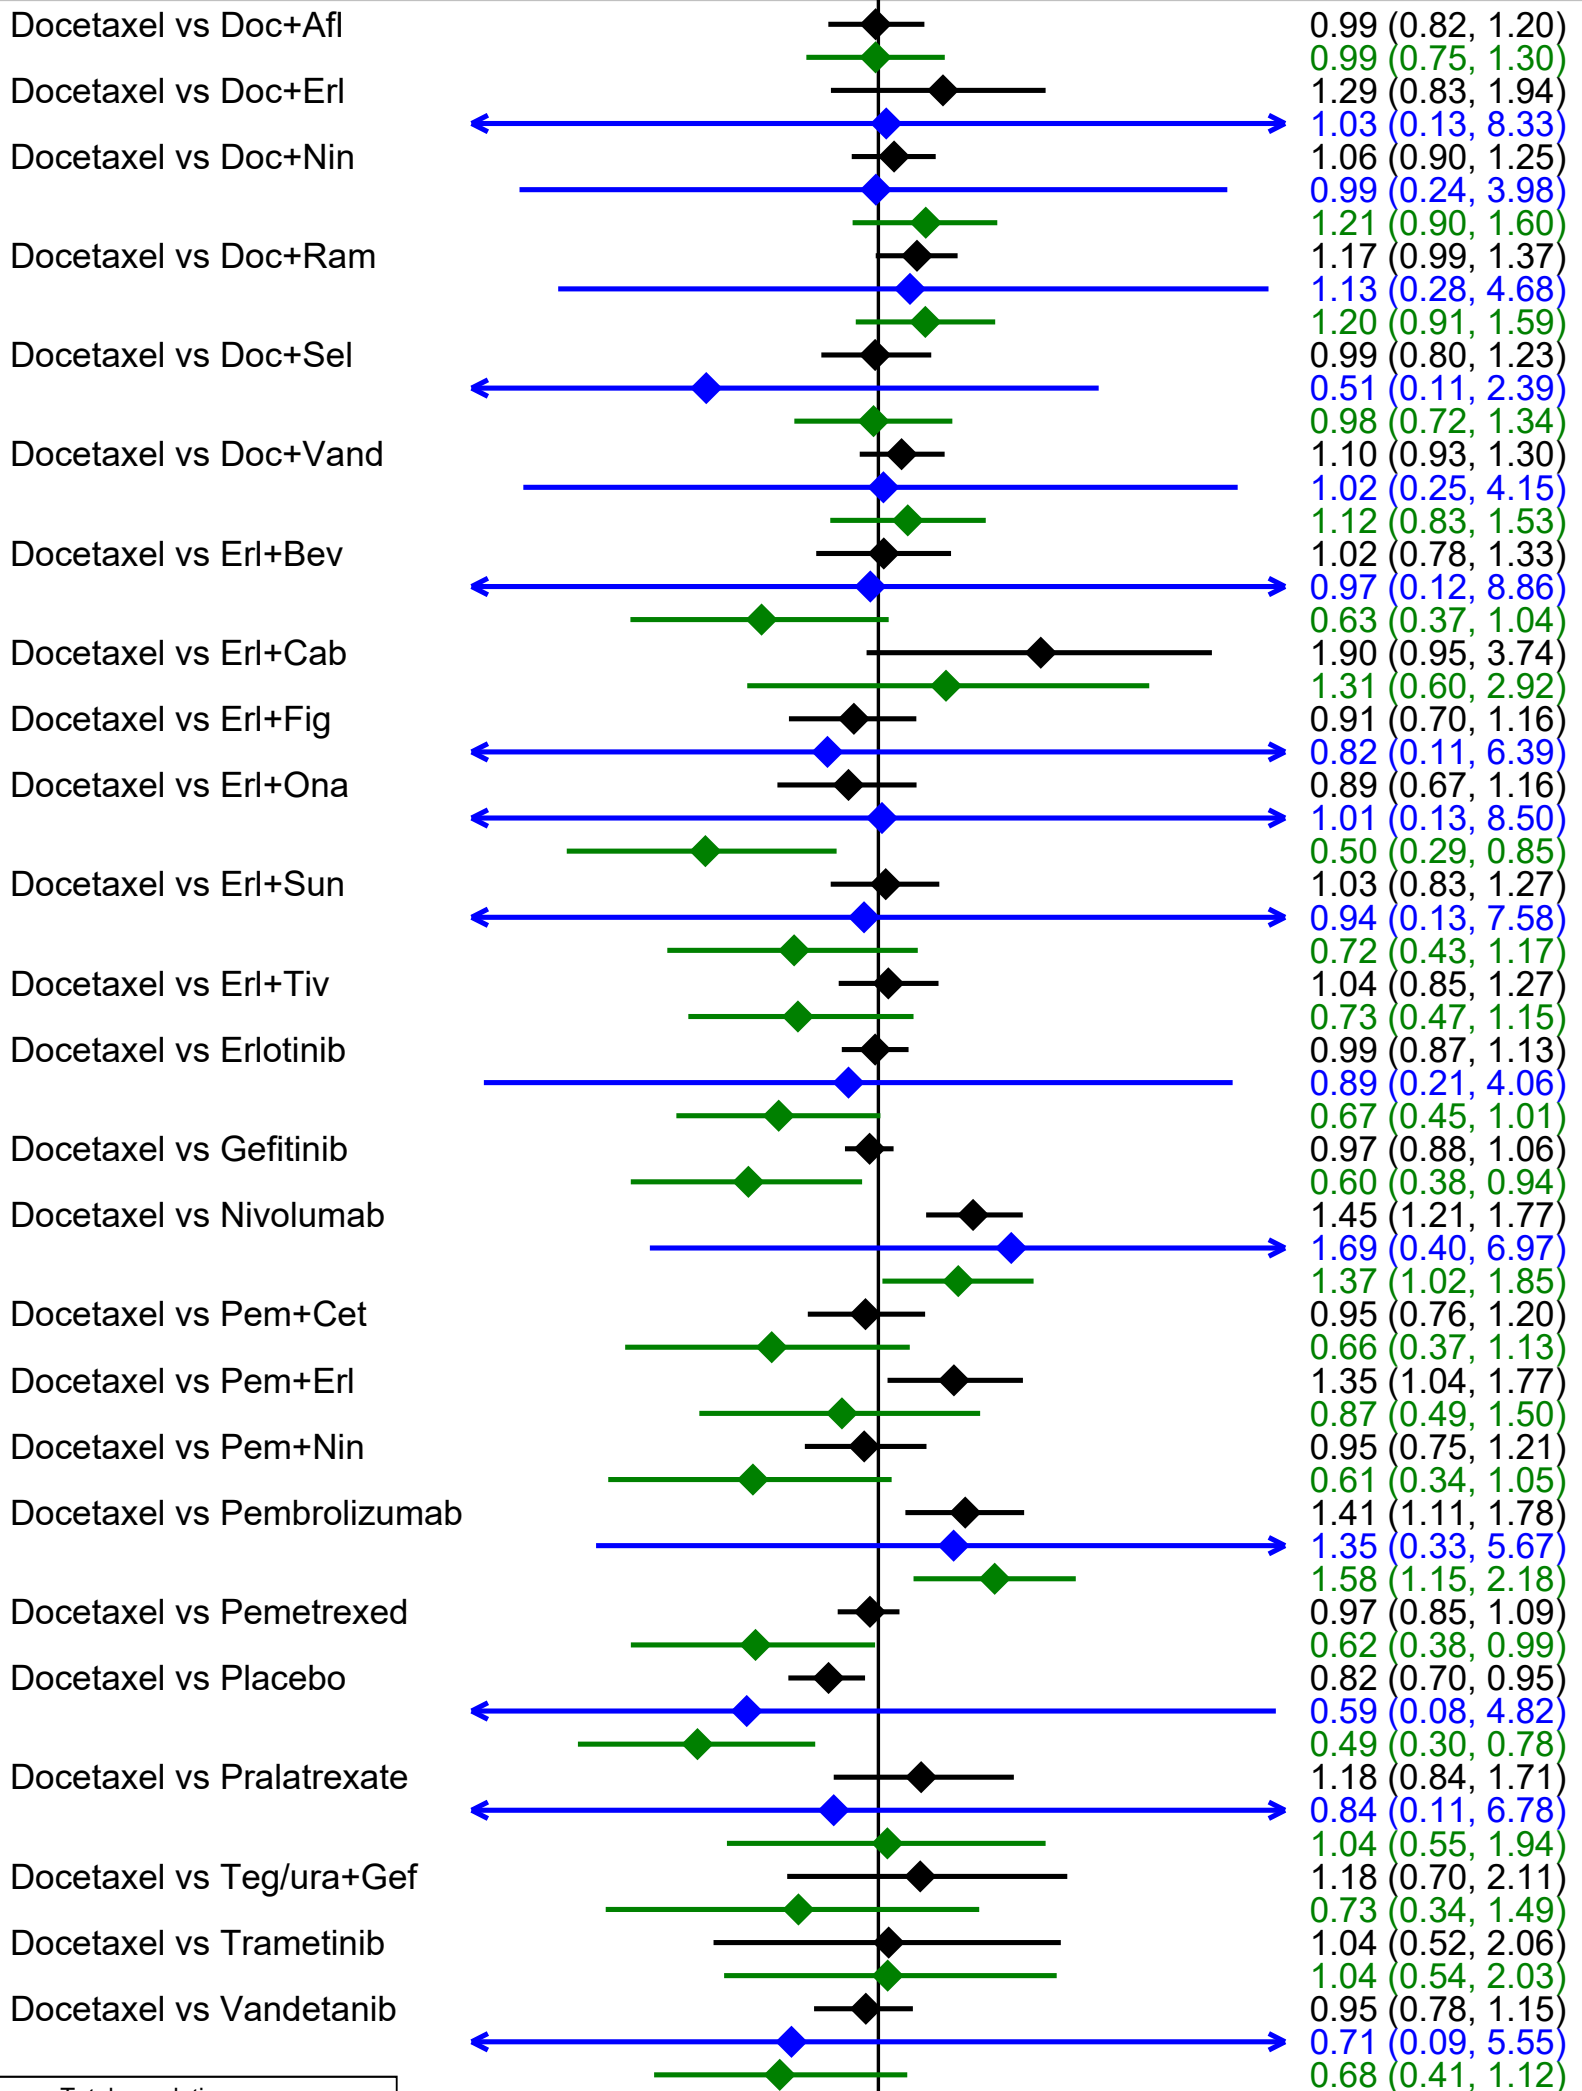

— Total population  
— Only squamous population  
— Only non-squamous population

.2 .3 .5 1 2 5

**Comparison**

**Overall Survival**

**HR (95% CrI)**

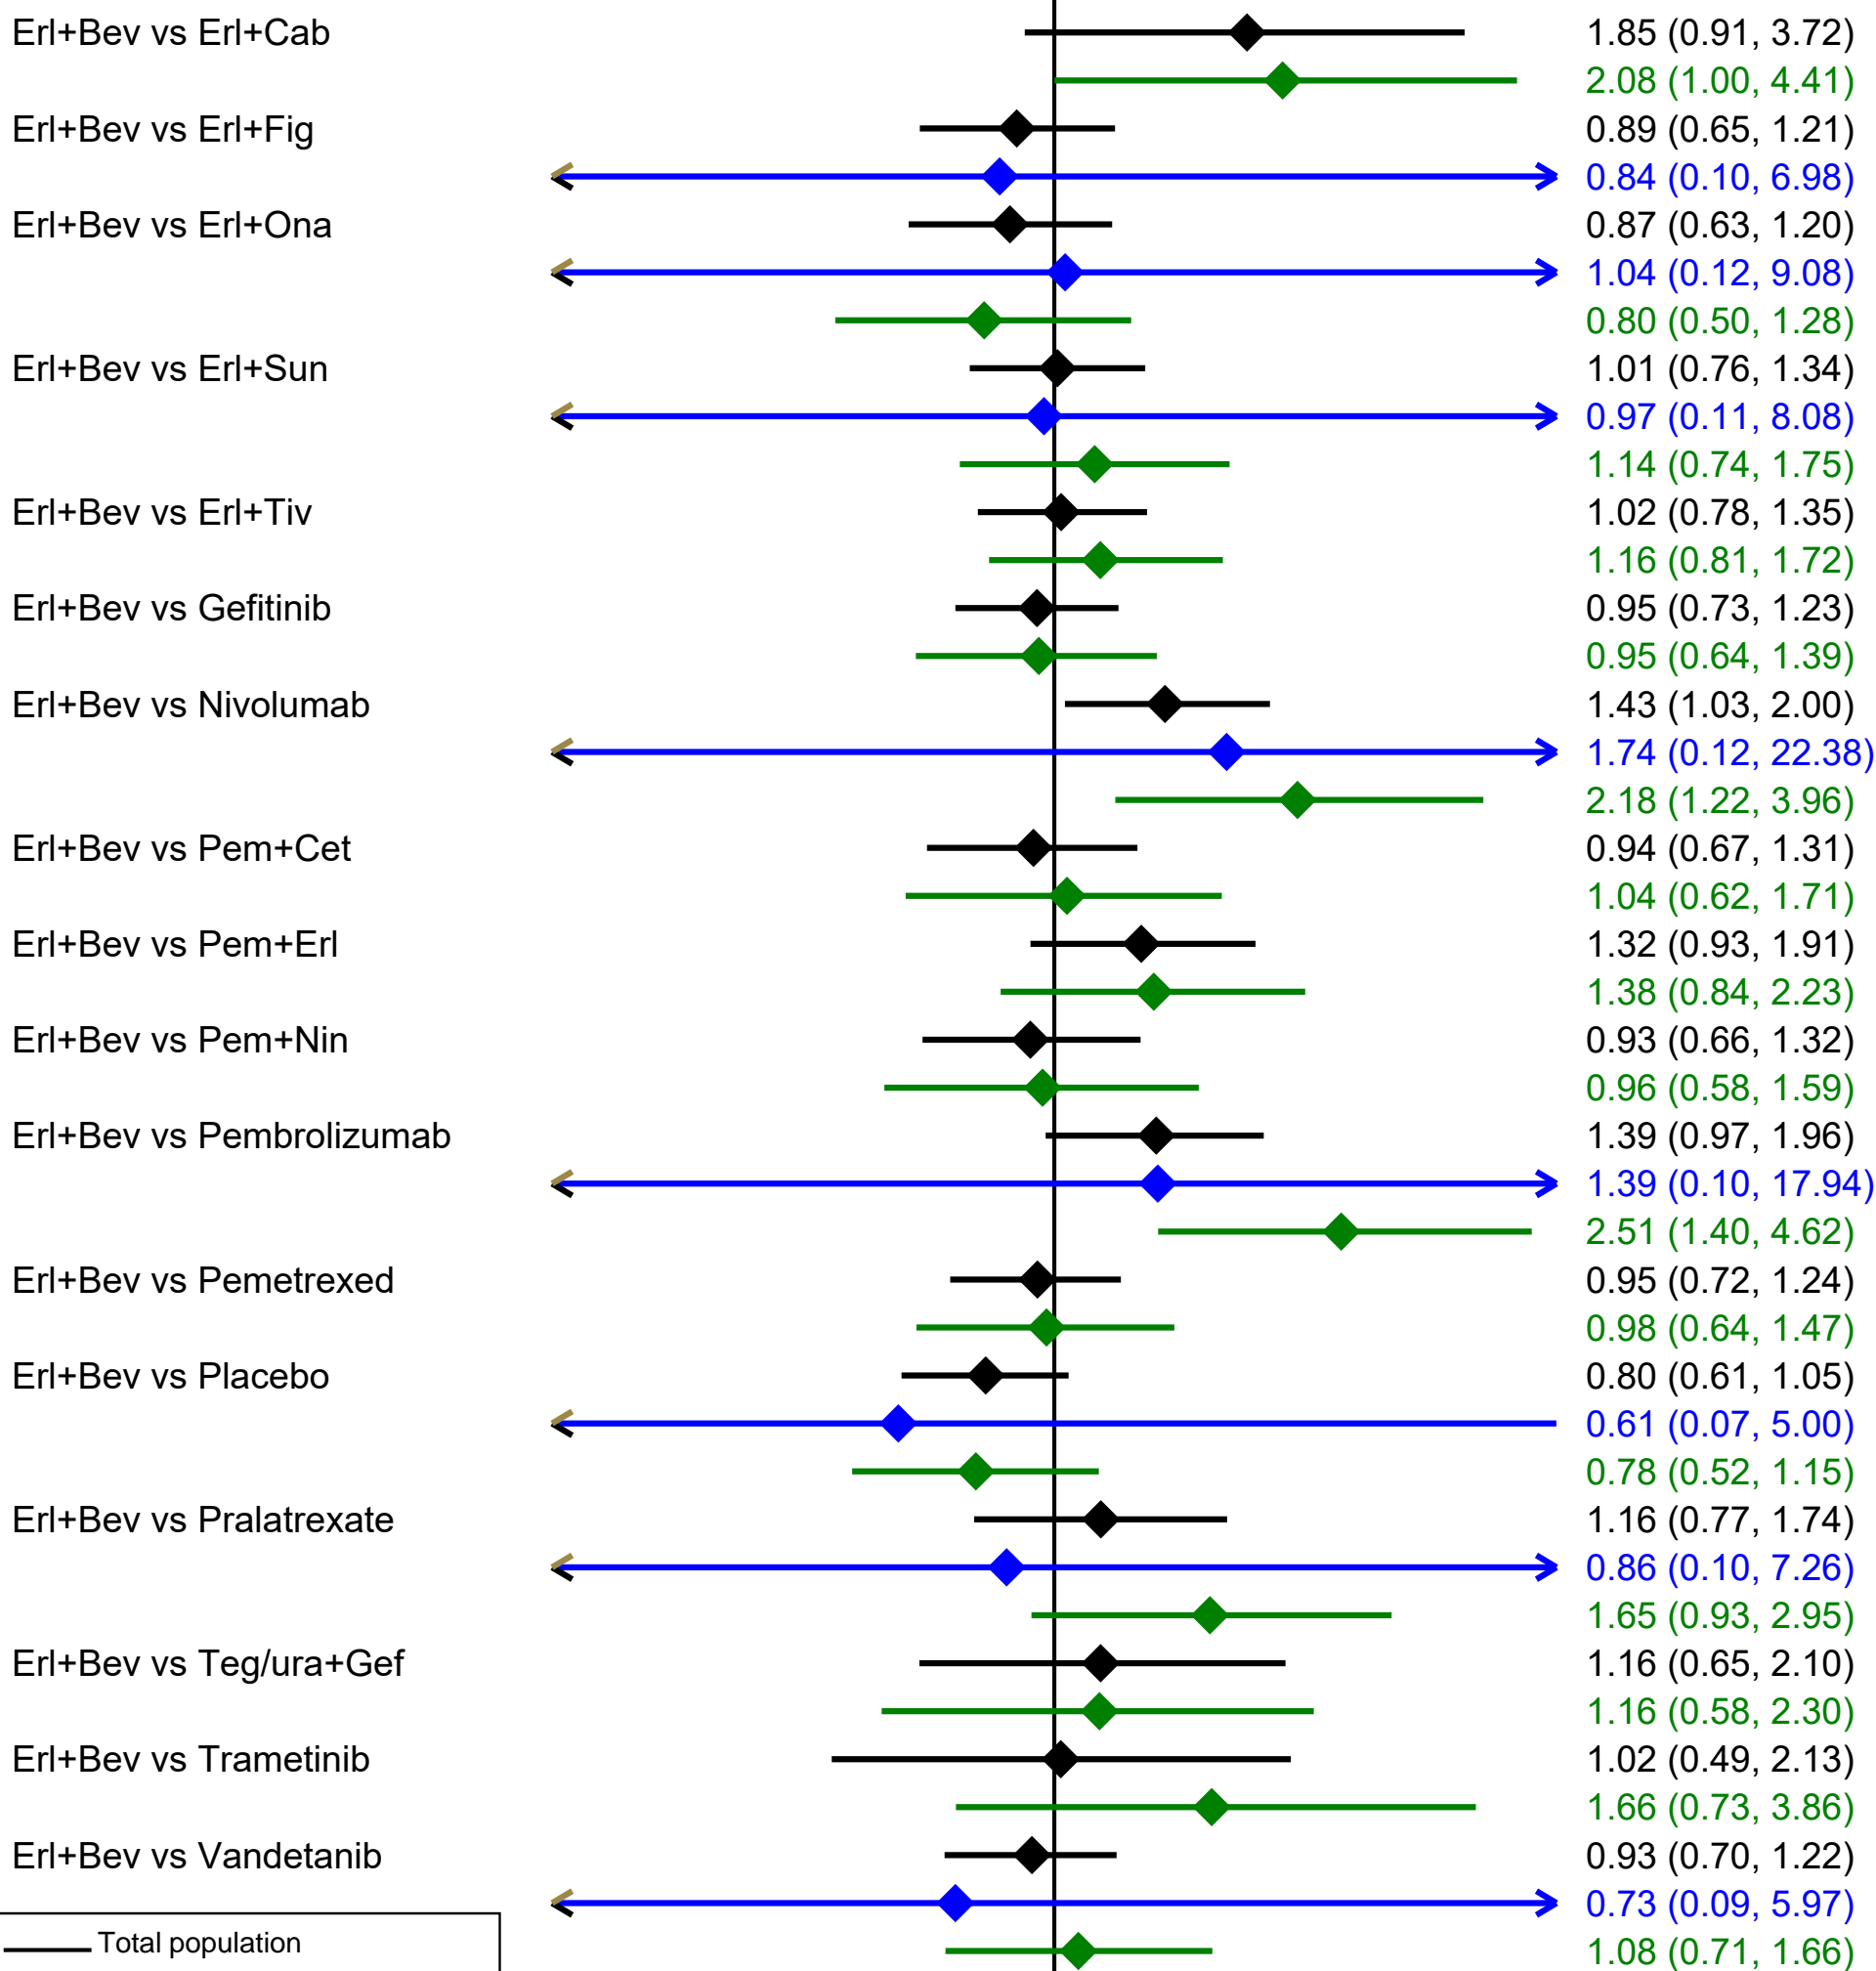

— Total population  
— Only squamous population  
— Only non-squamous population

.2 .3 .5 1 2 5

**Comparison**

**Overall Survival**

**HR (95% CrI)**

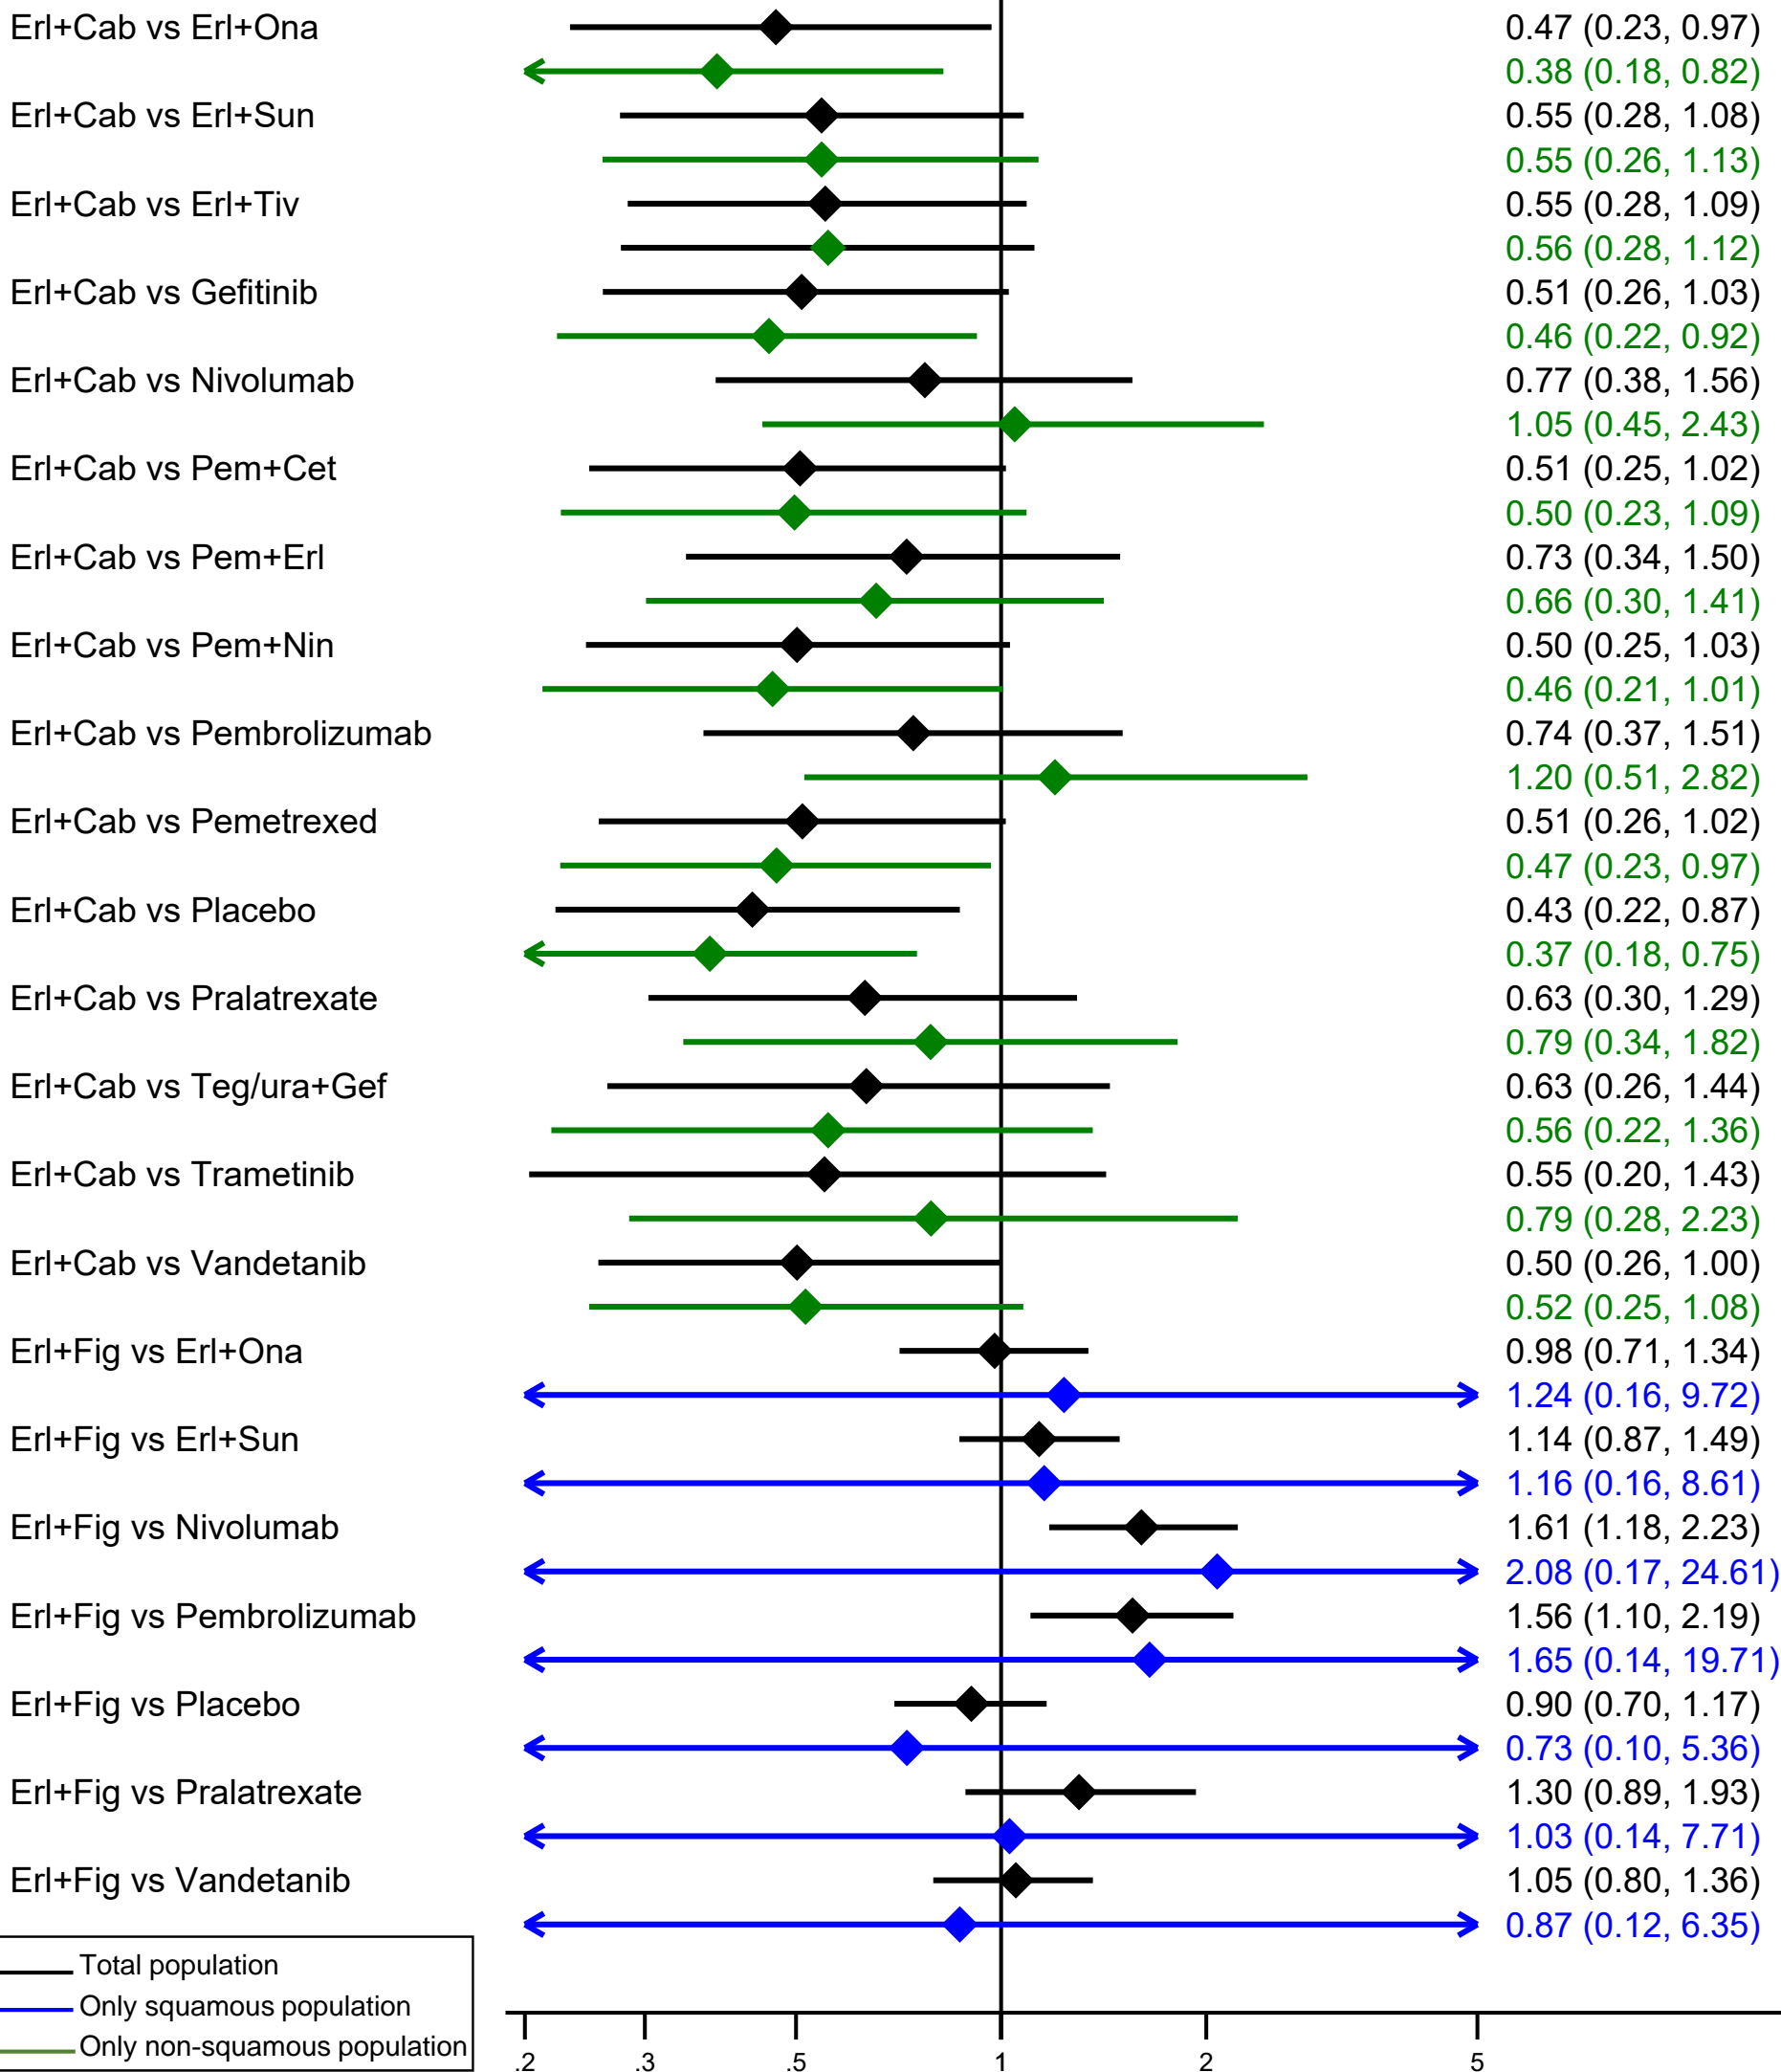

— Total population  
— Only squamous population  
— Only non-squamous population

**Comparison**

**Overall Survival**

**HR (95% CrI)**

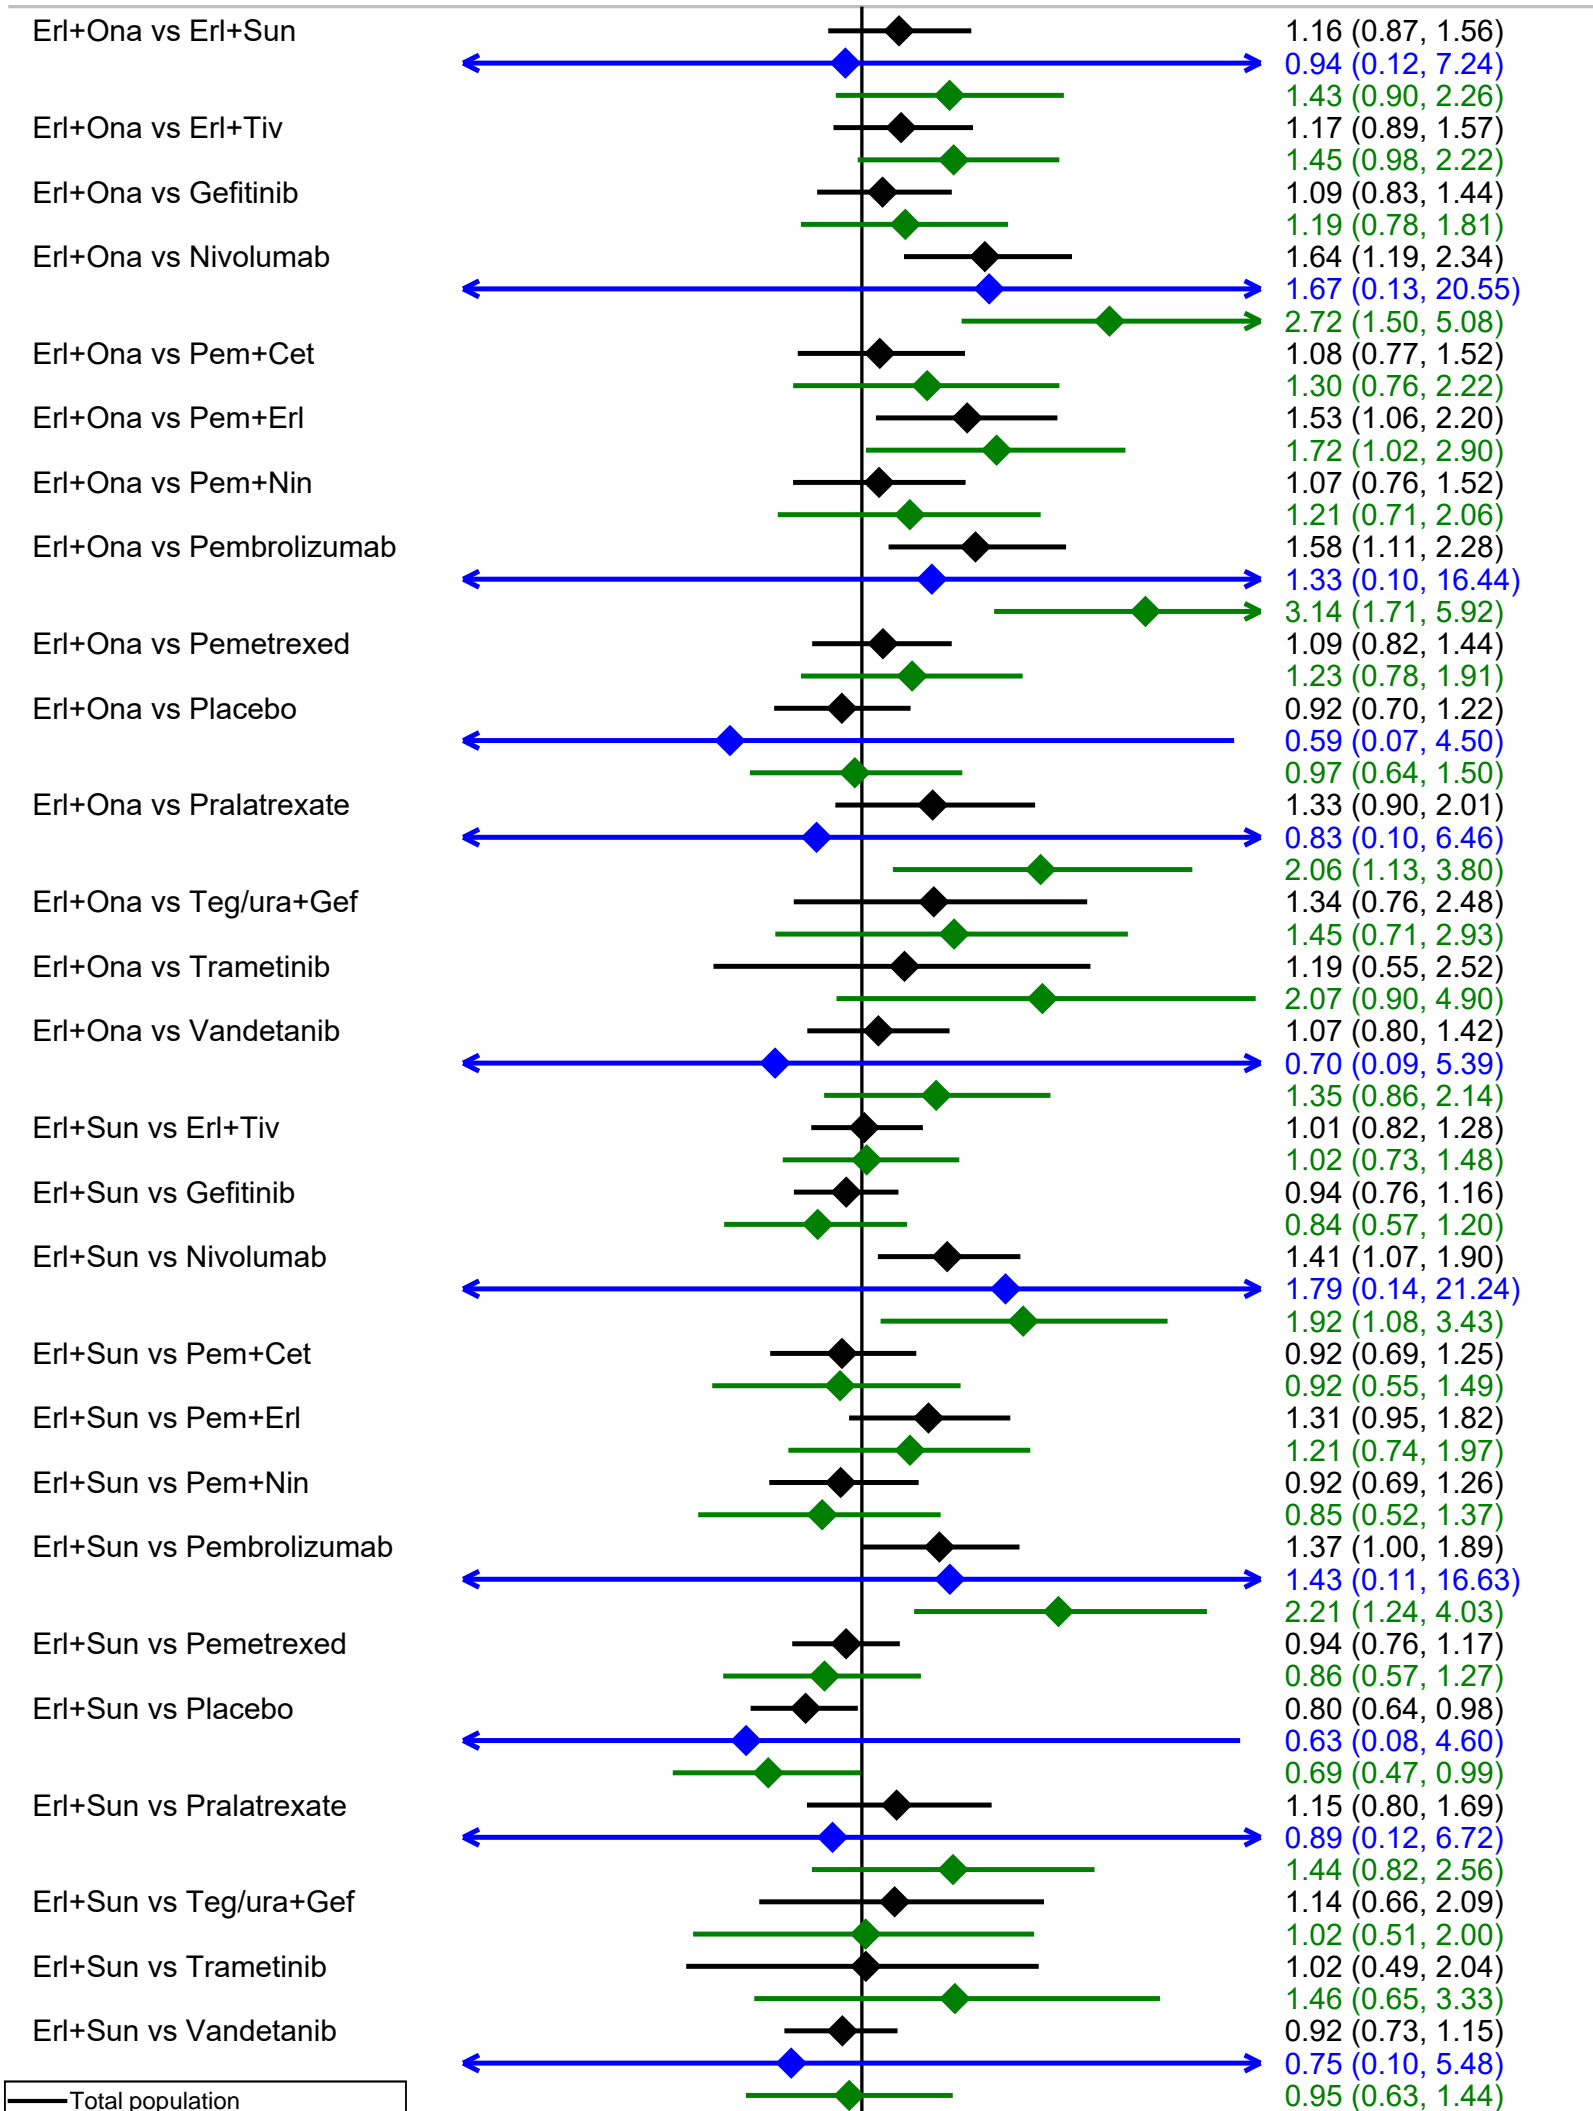

— Total population  
— Only squamous population  
— Only non-squamous population

.2 .3 .5 1 2 5

**Comparison**

**Overall Survival**

**HR (95% CrI)**

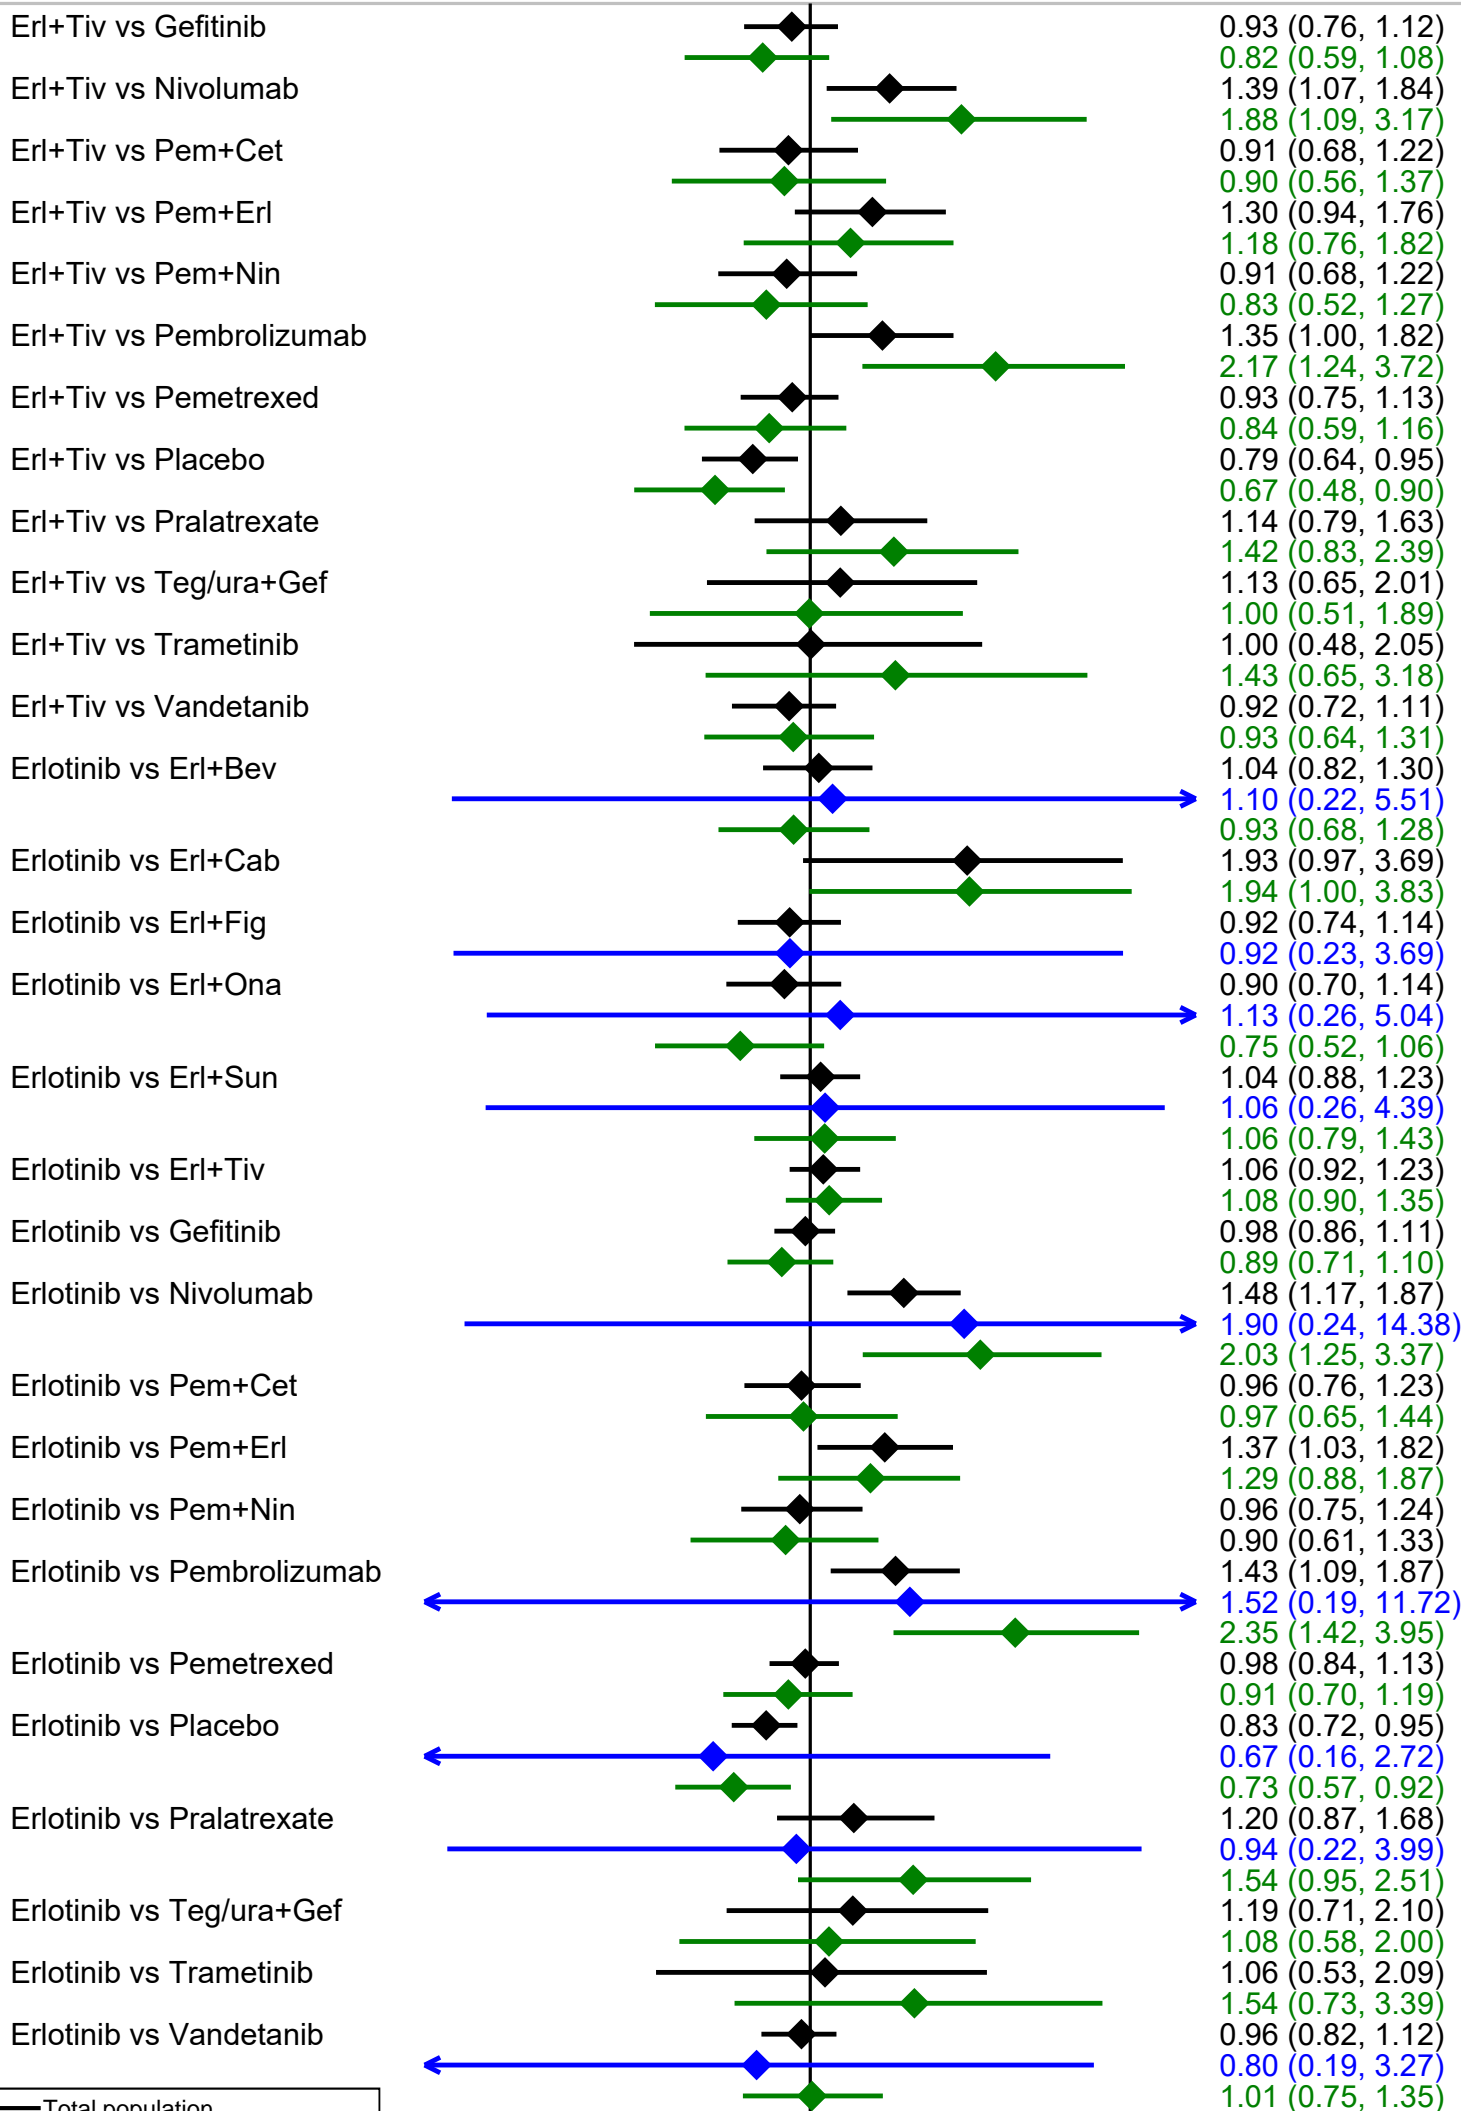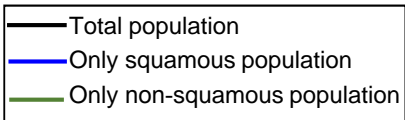

.2 .3 .5 1 2 5



**Comparison**

**Overall Survival**

**HR (95% CrI)**

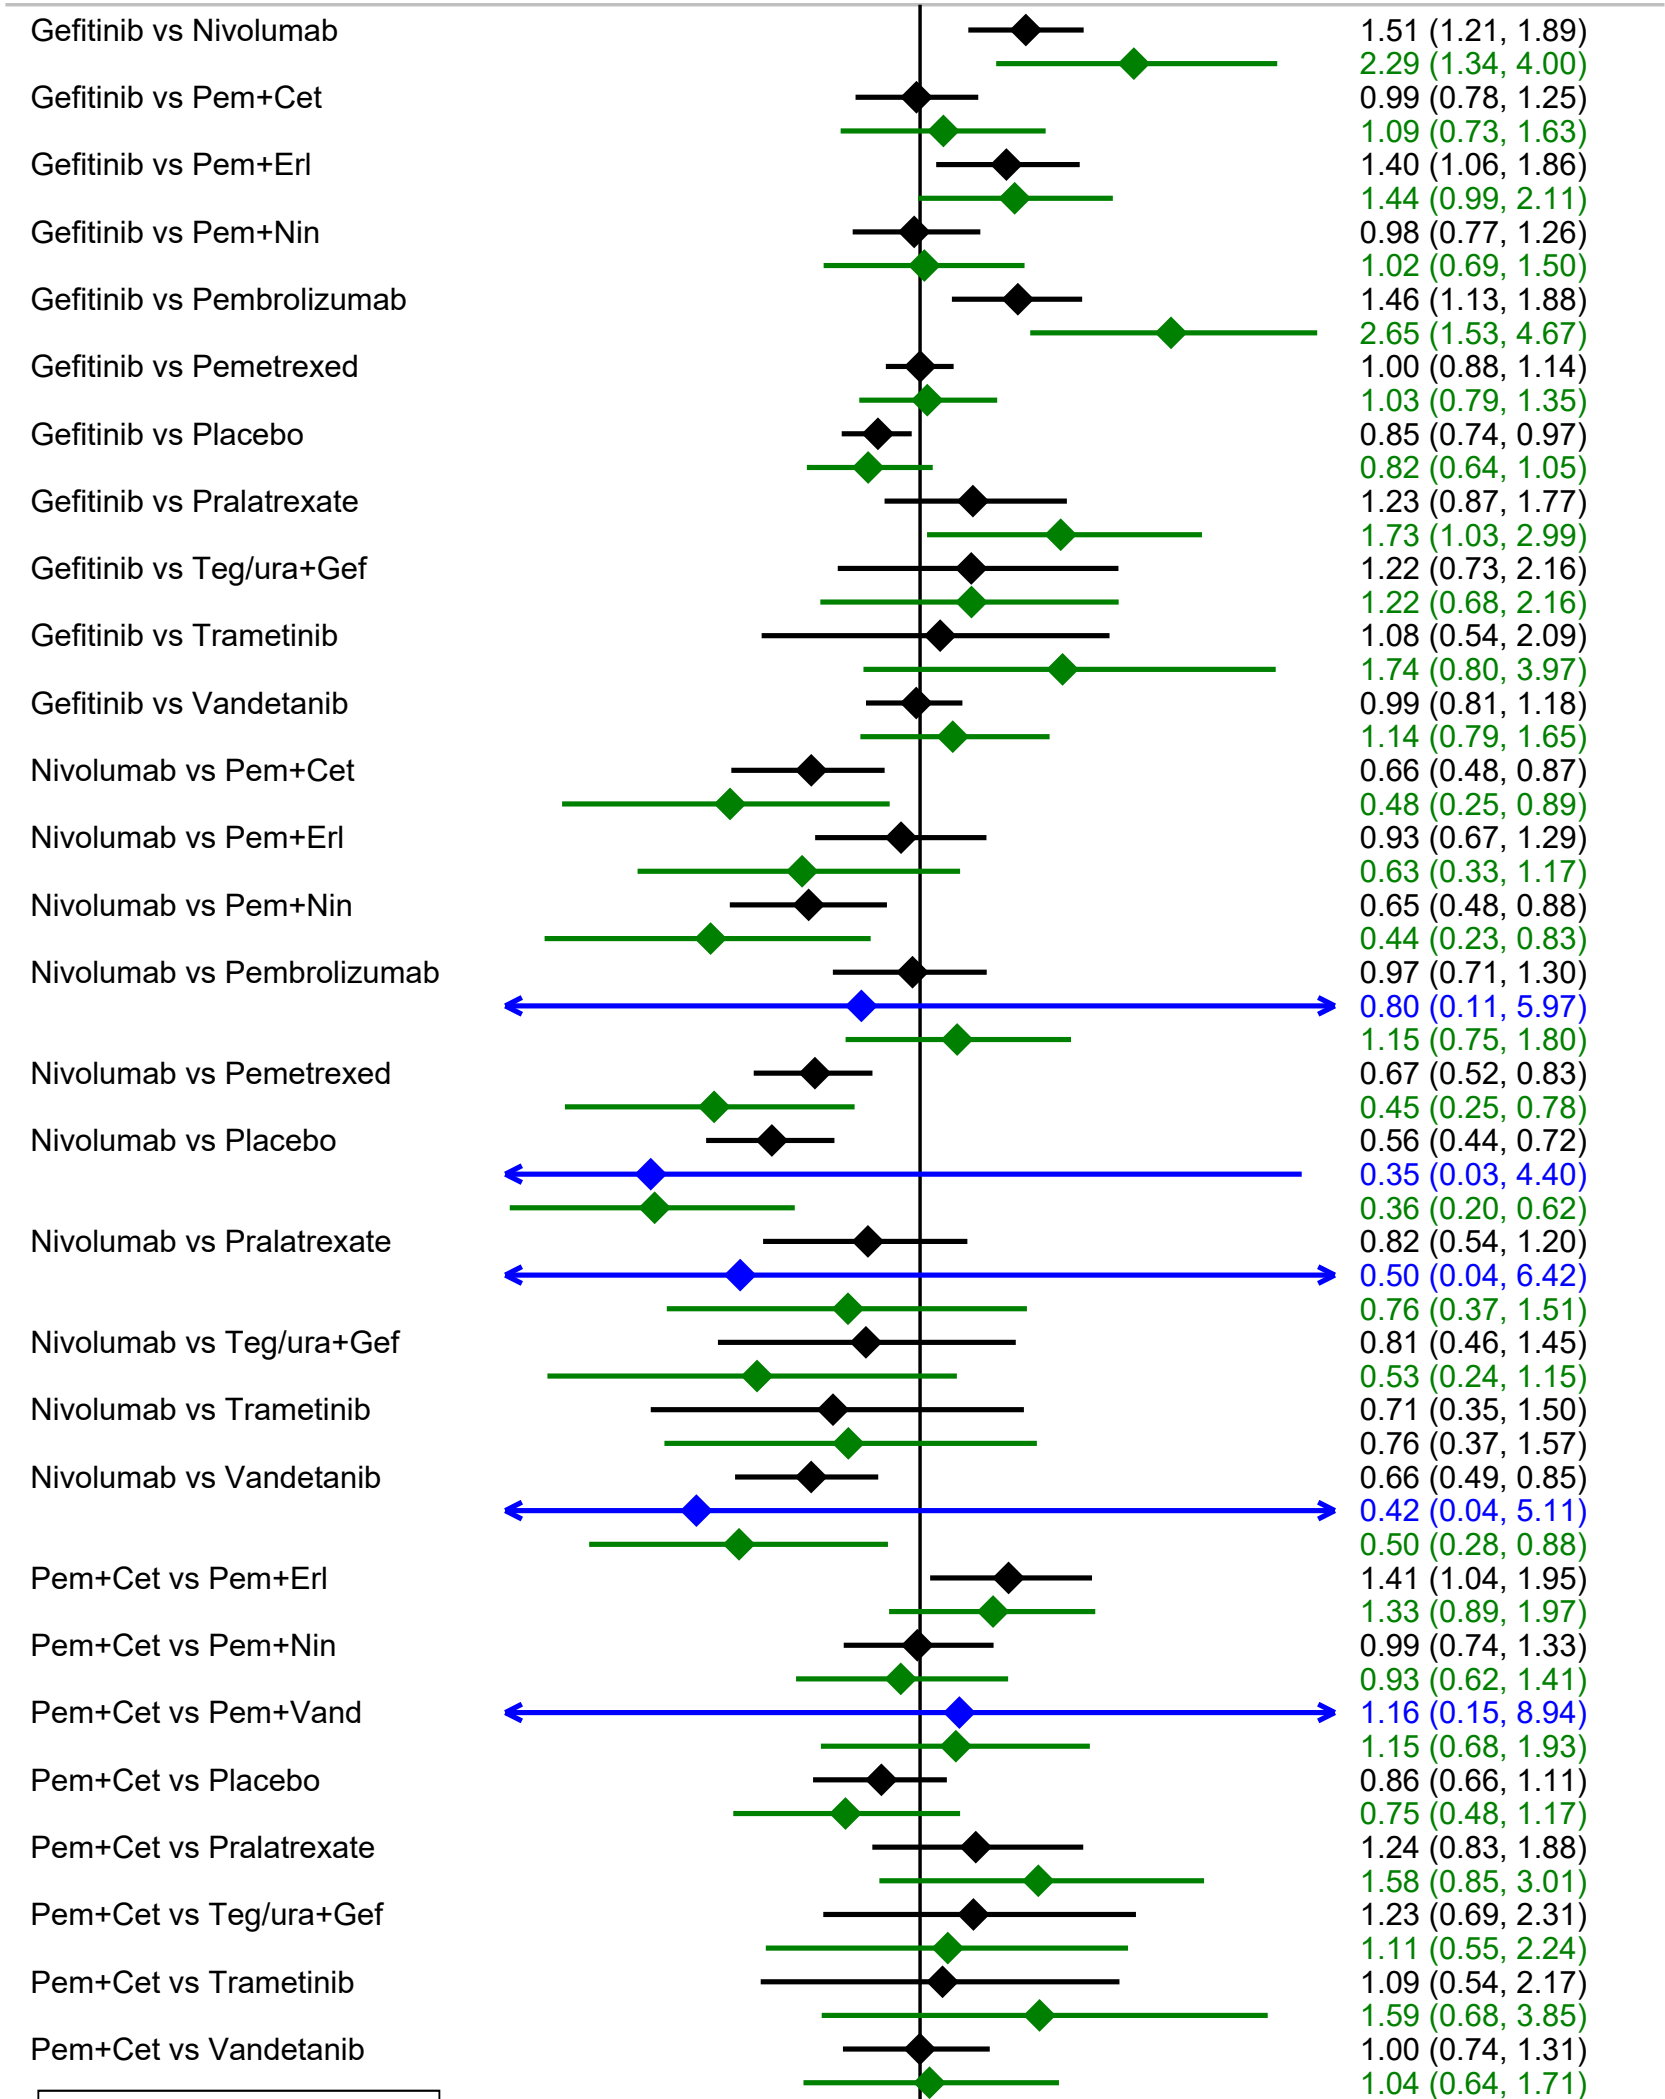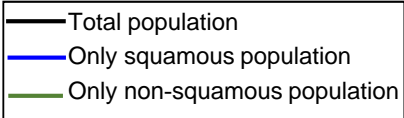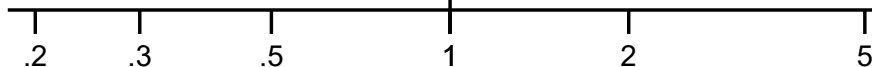

**Comparison**

**Overall Survival**

**HR (95% CrI)**

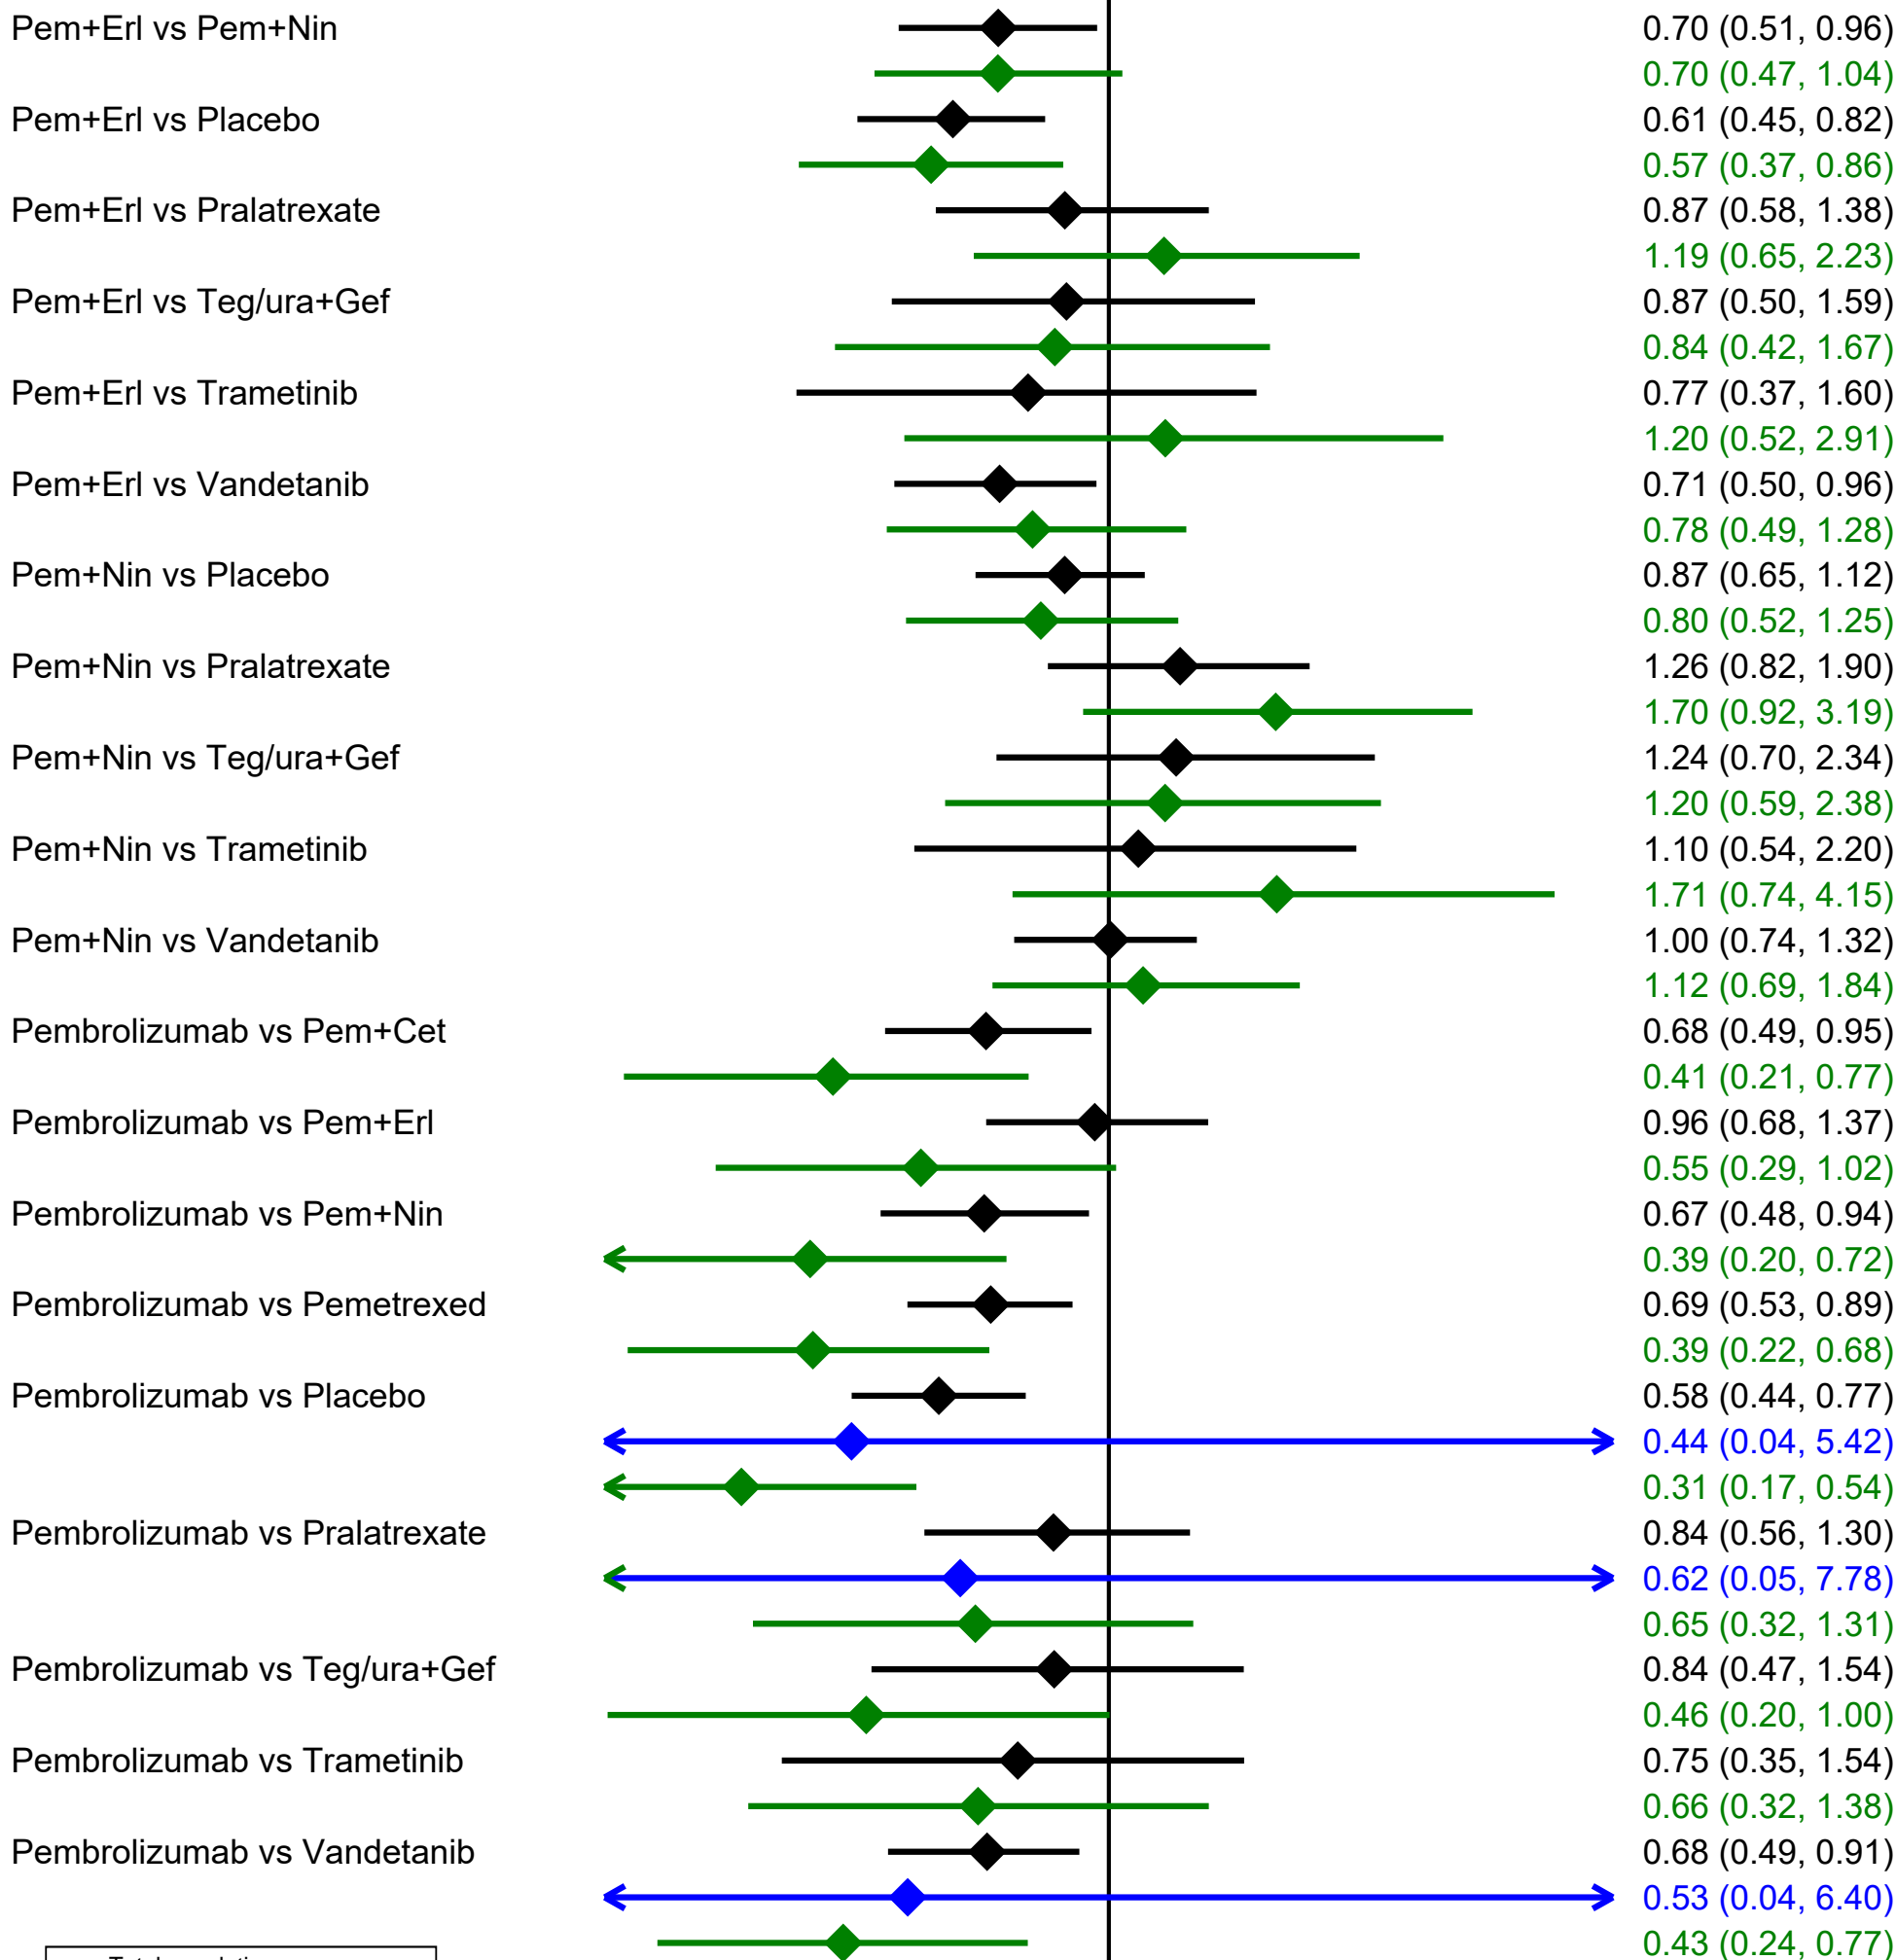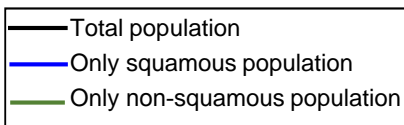

.2 .3 .5 1 2 5

**Comparison**

**Overall Survival**

**HR (95% CrI)**

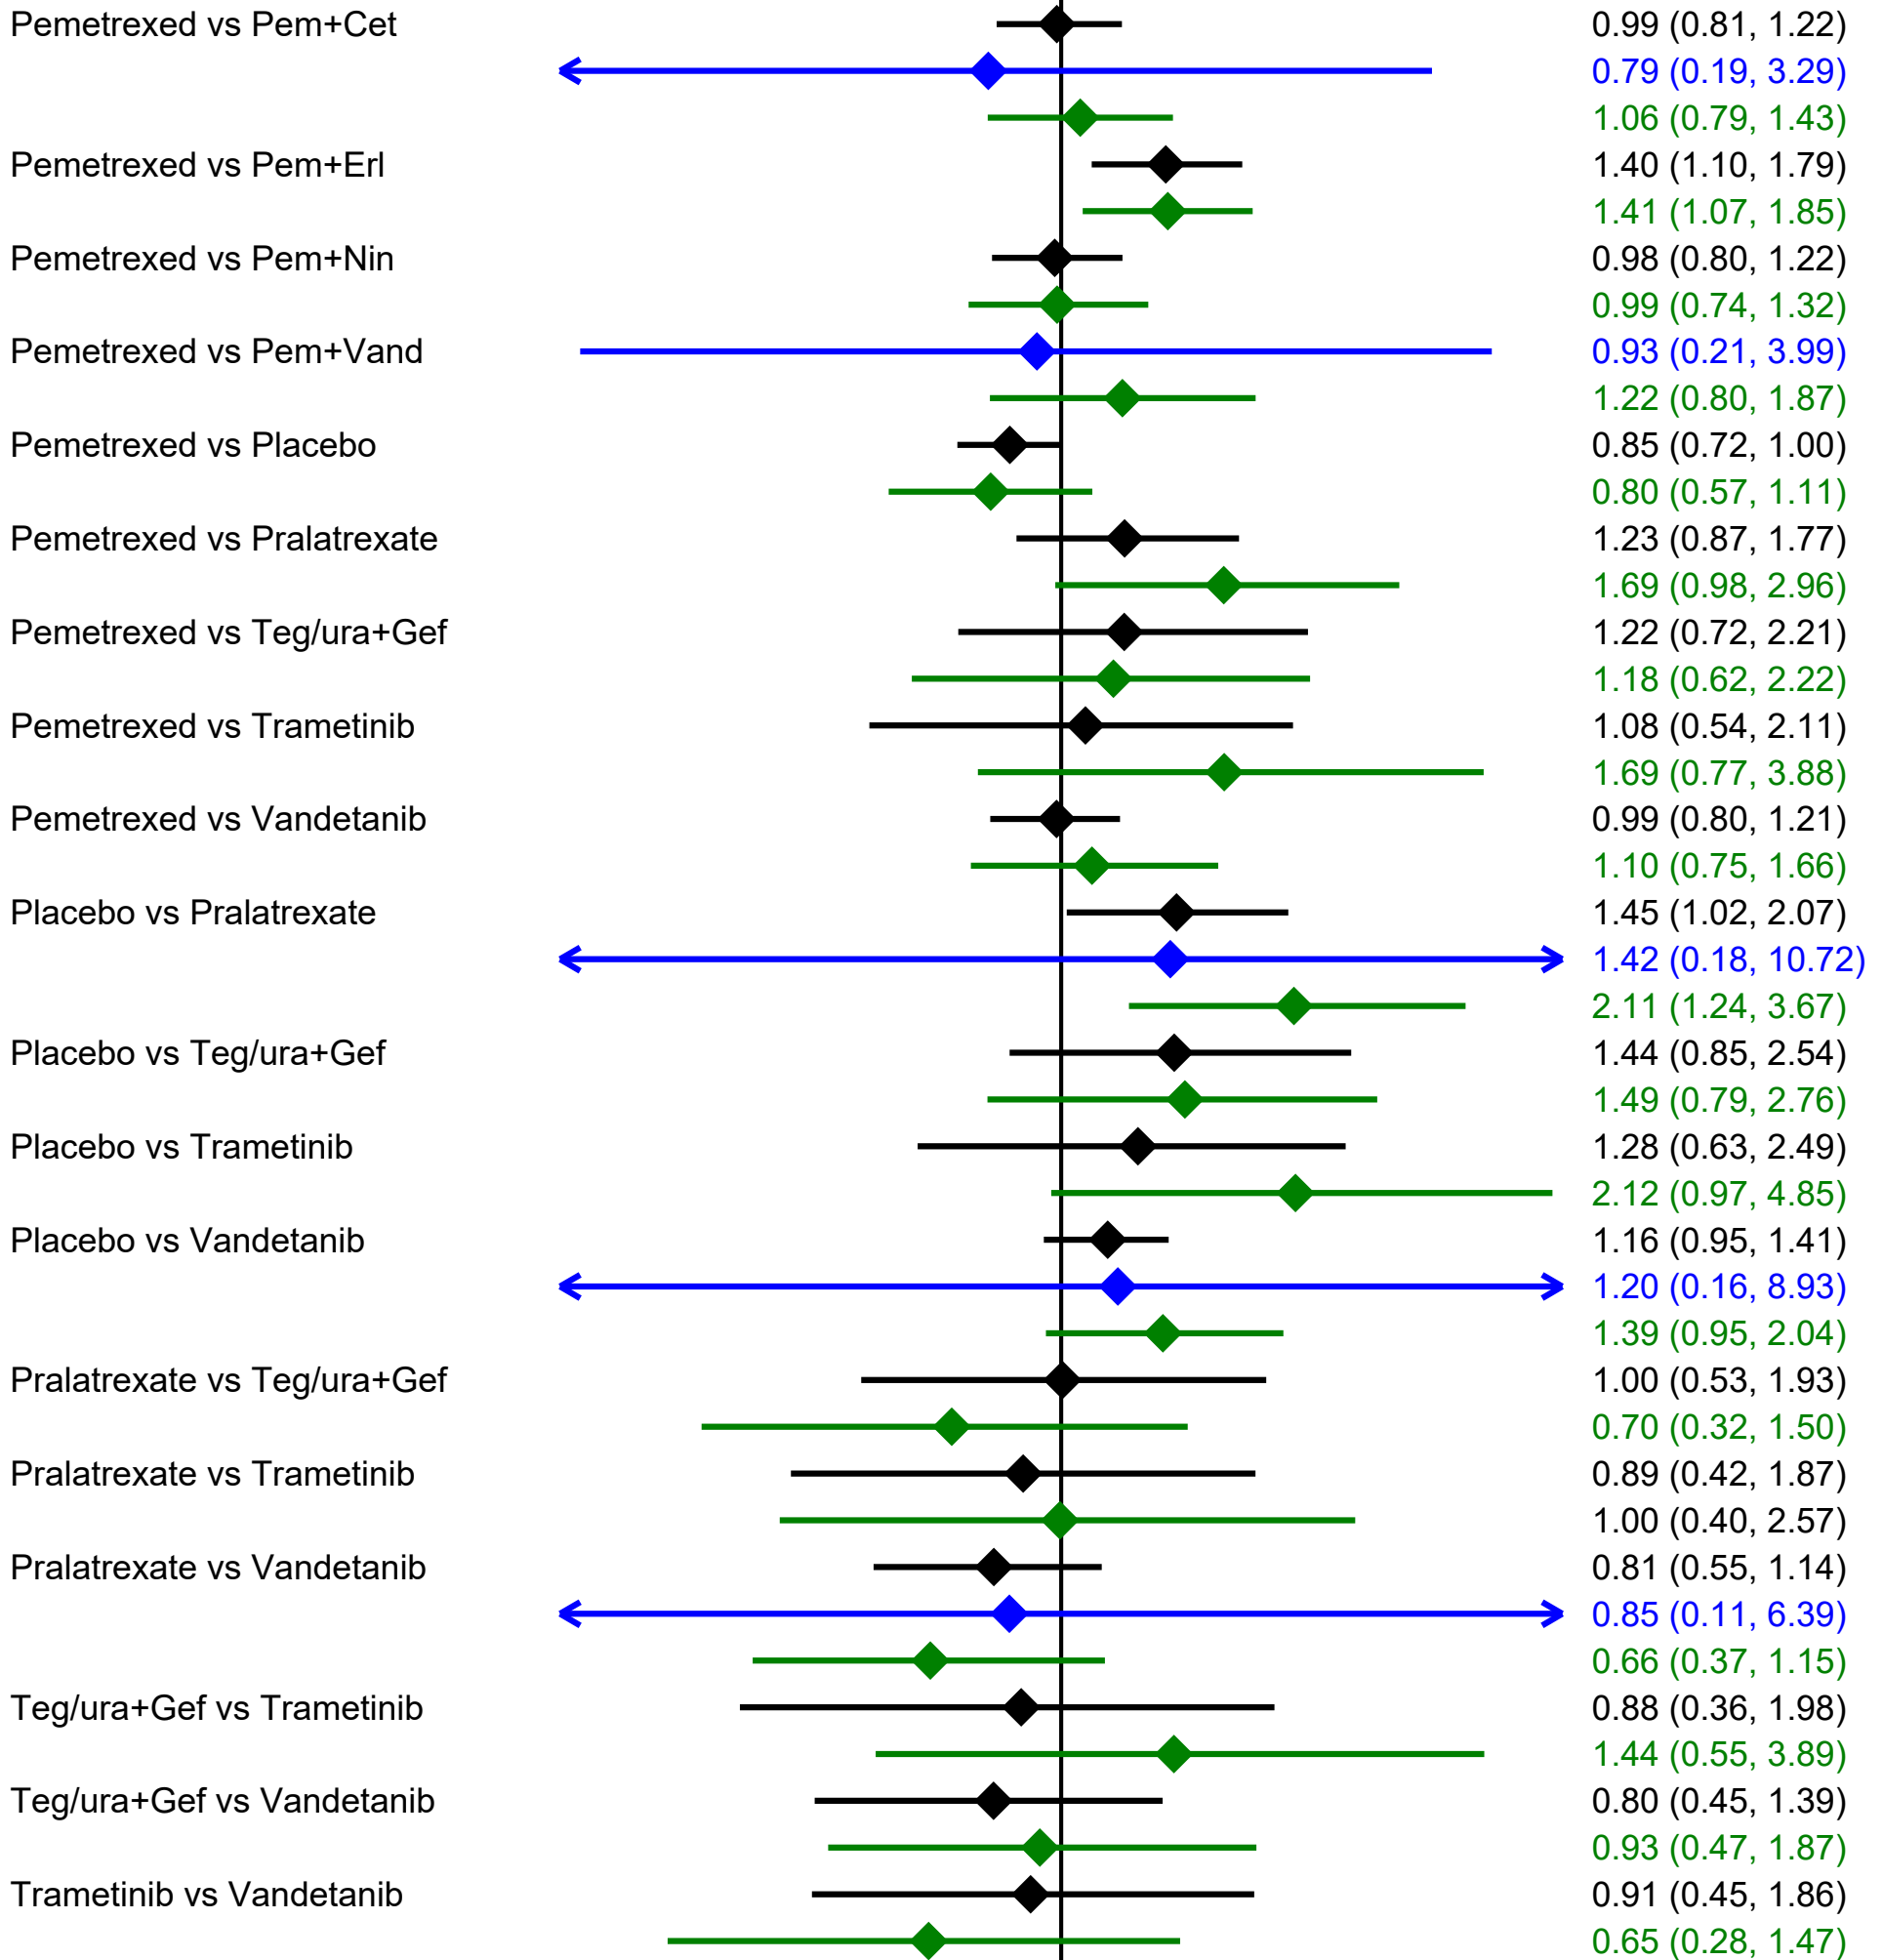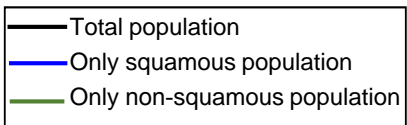

.2 .3 .5 1 2 5

**Comparison**

**Progression Free Survival**

**HR (95% CrI)**

*Favors first treatment* ←      → *Favors second treatment*

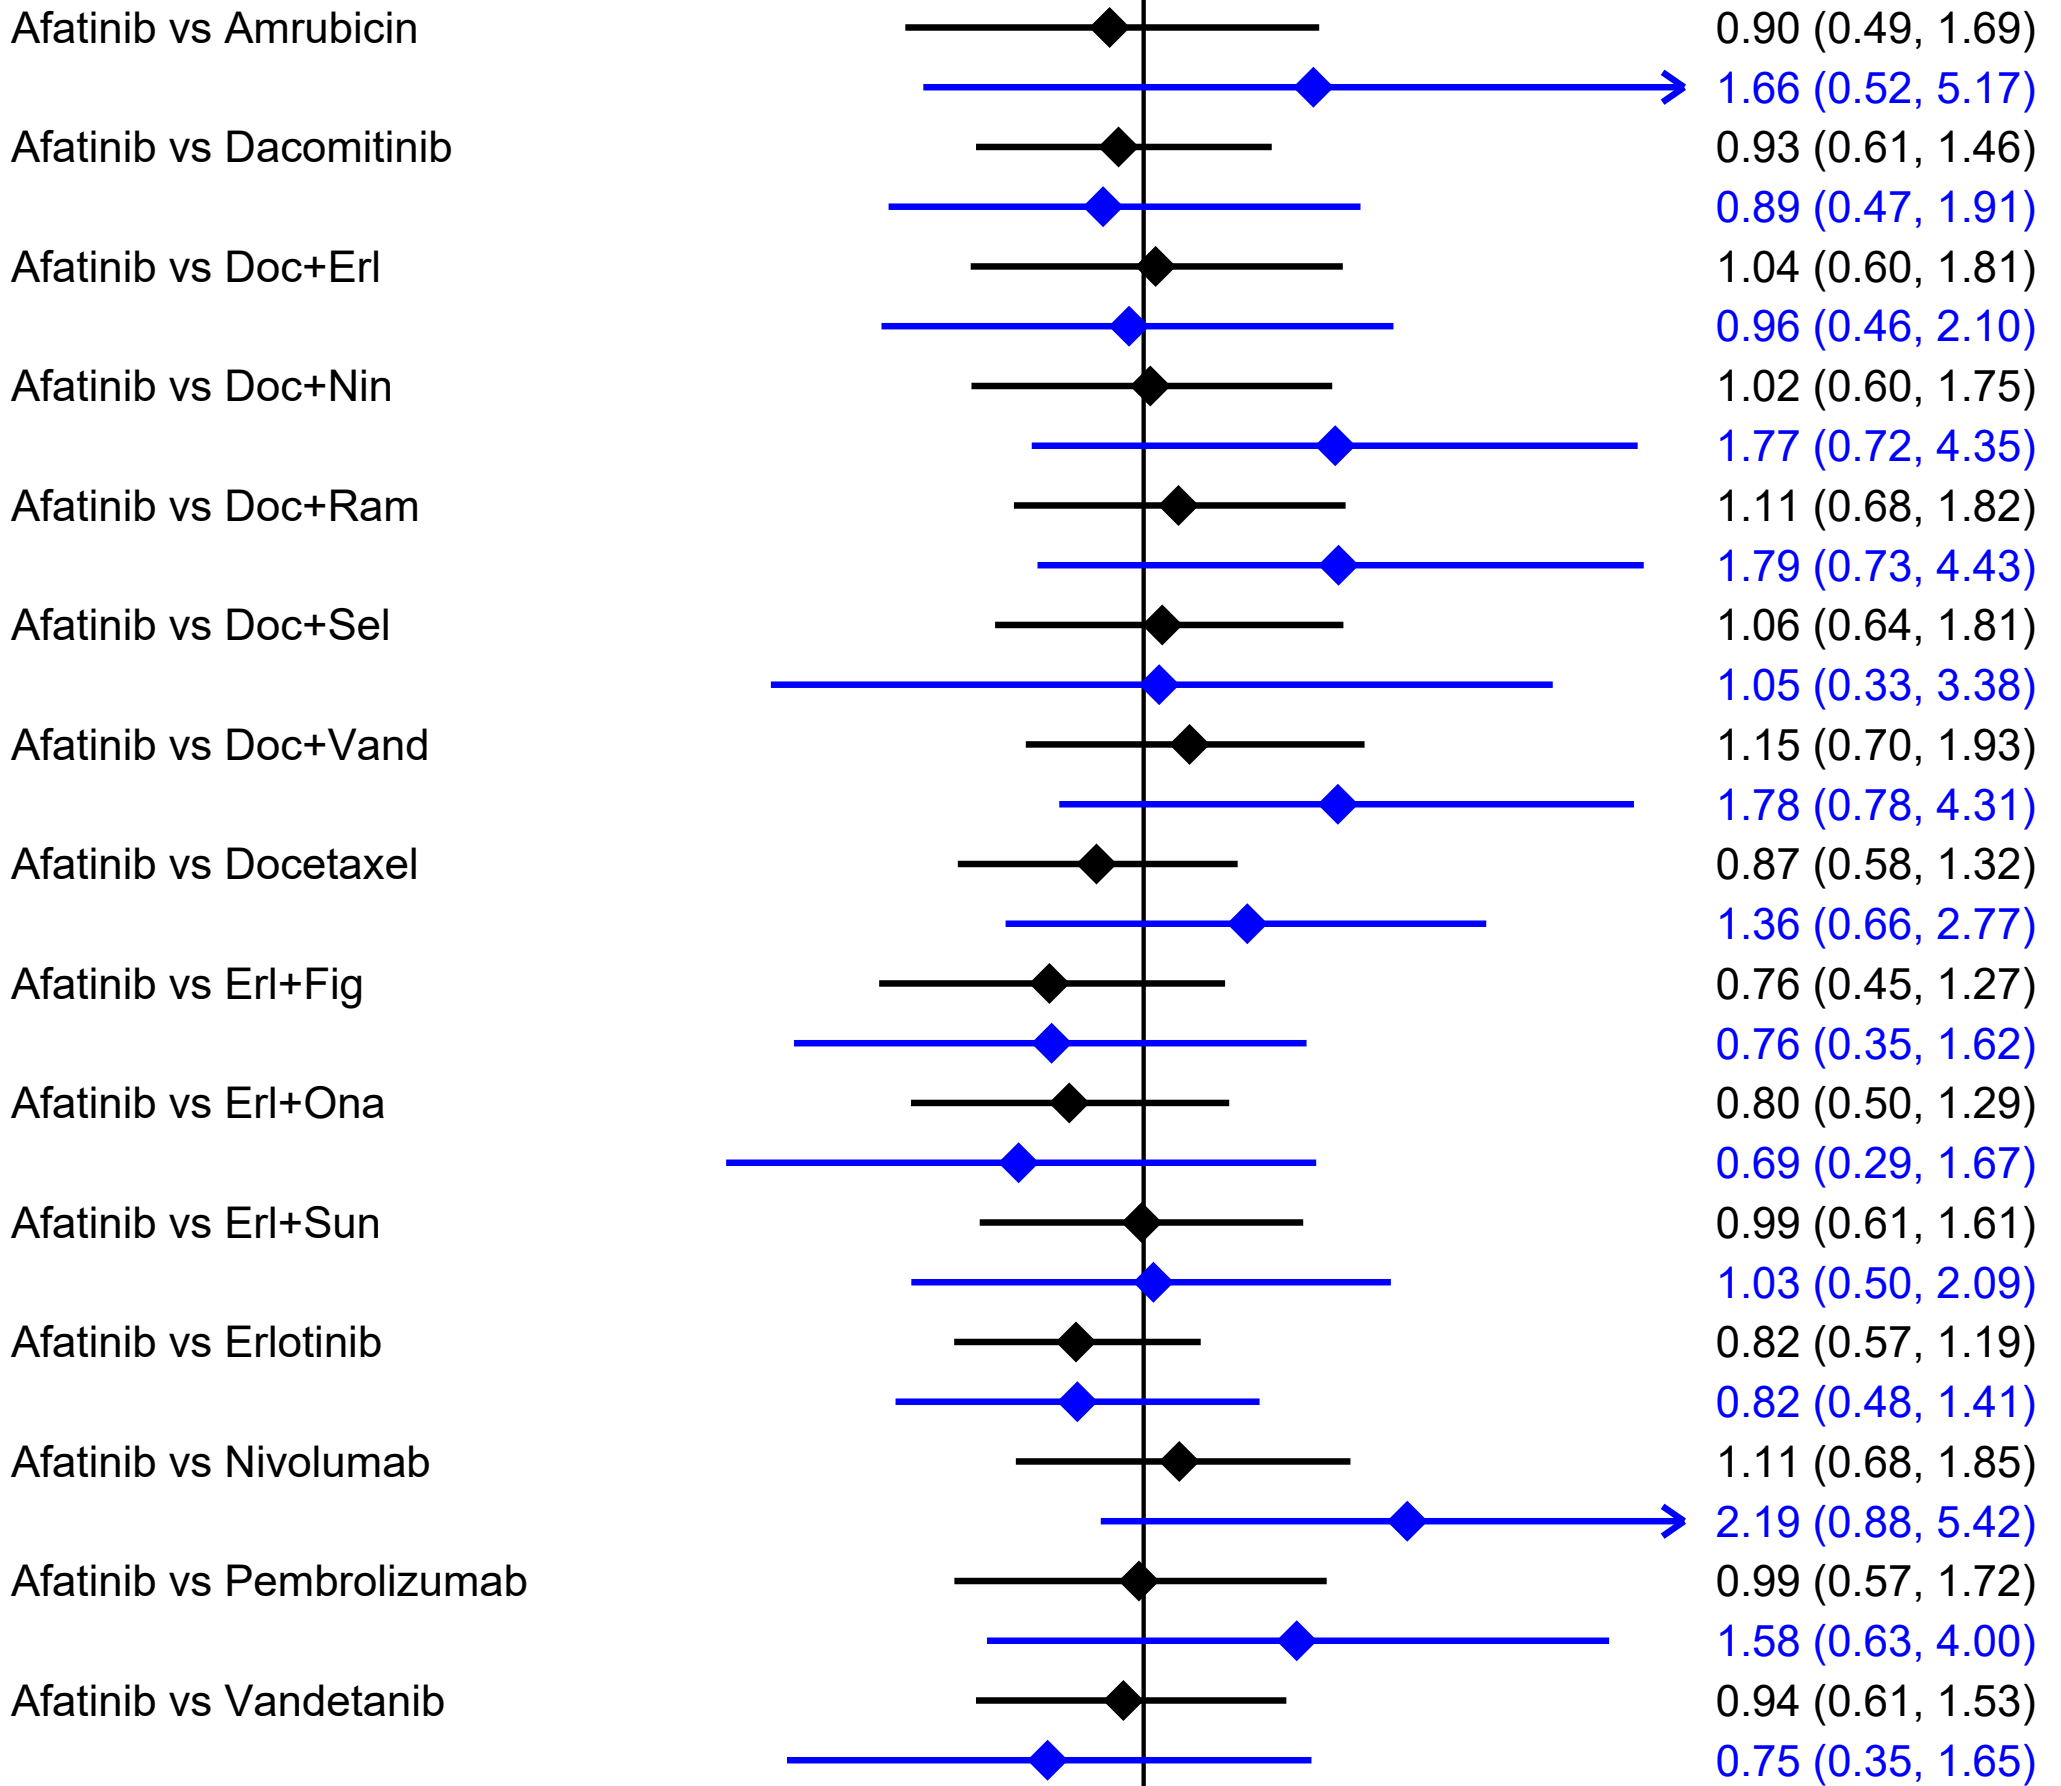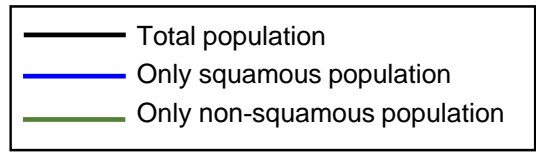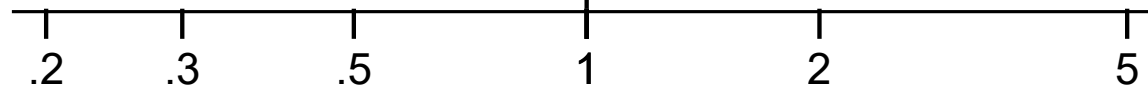

**Comparison**

**Progression Free Survival**

**HR (95% CrI)**

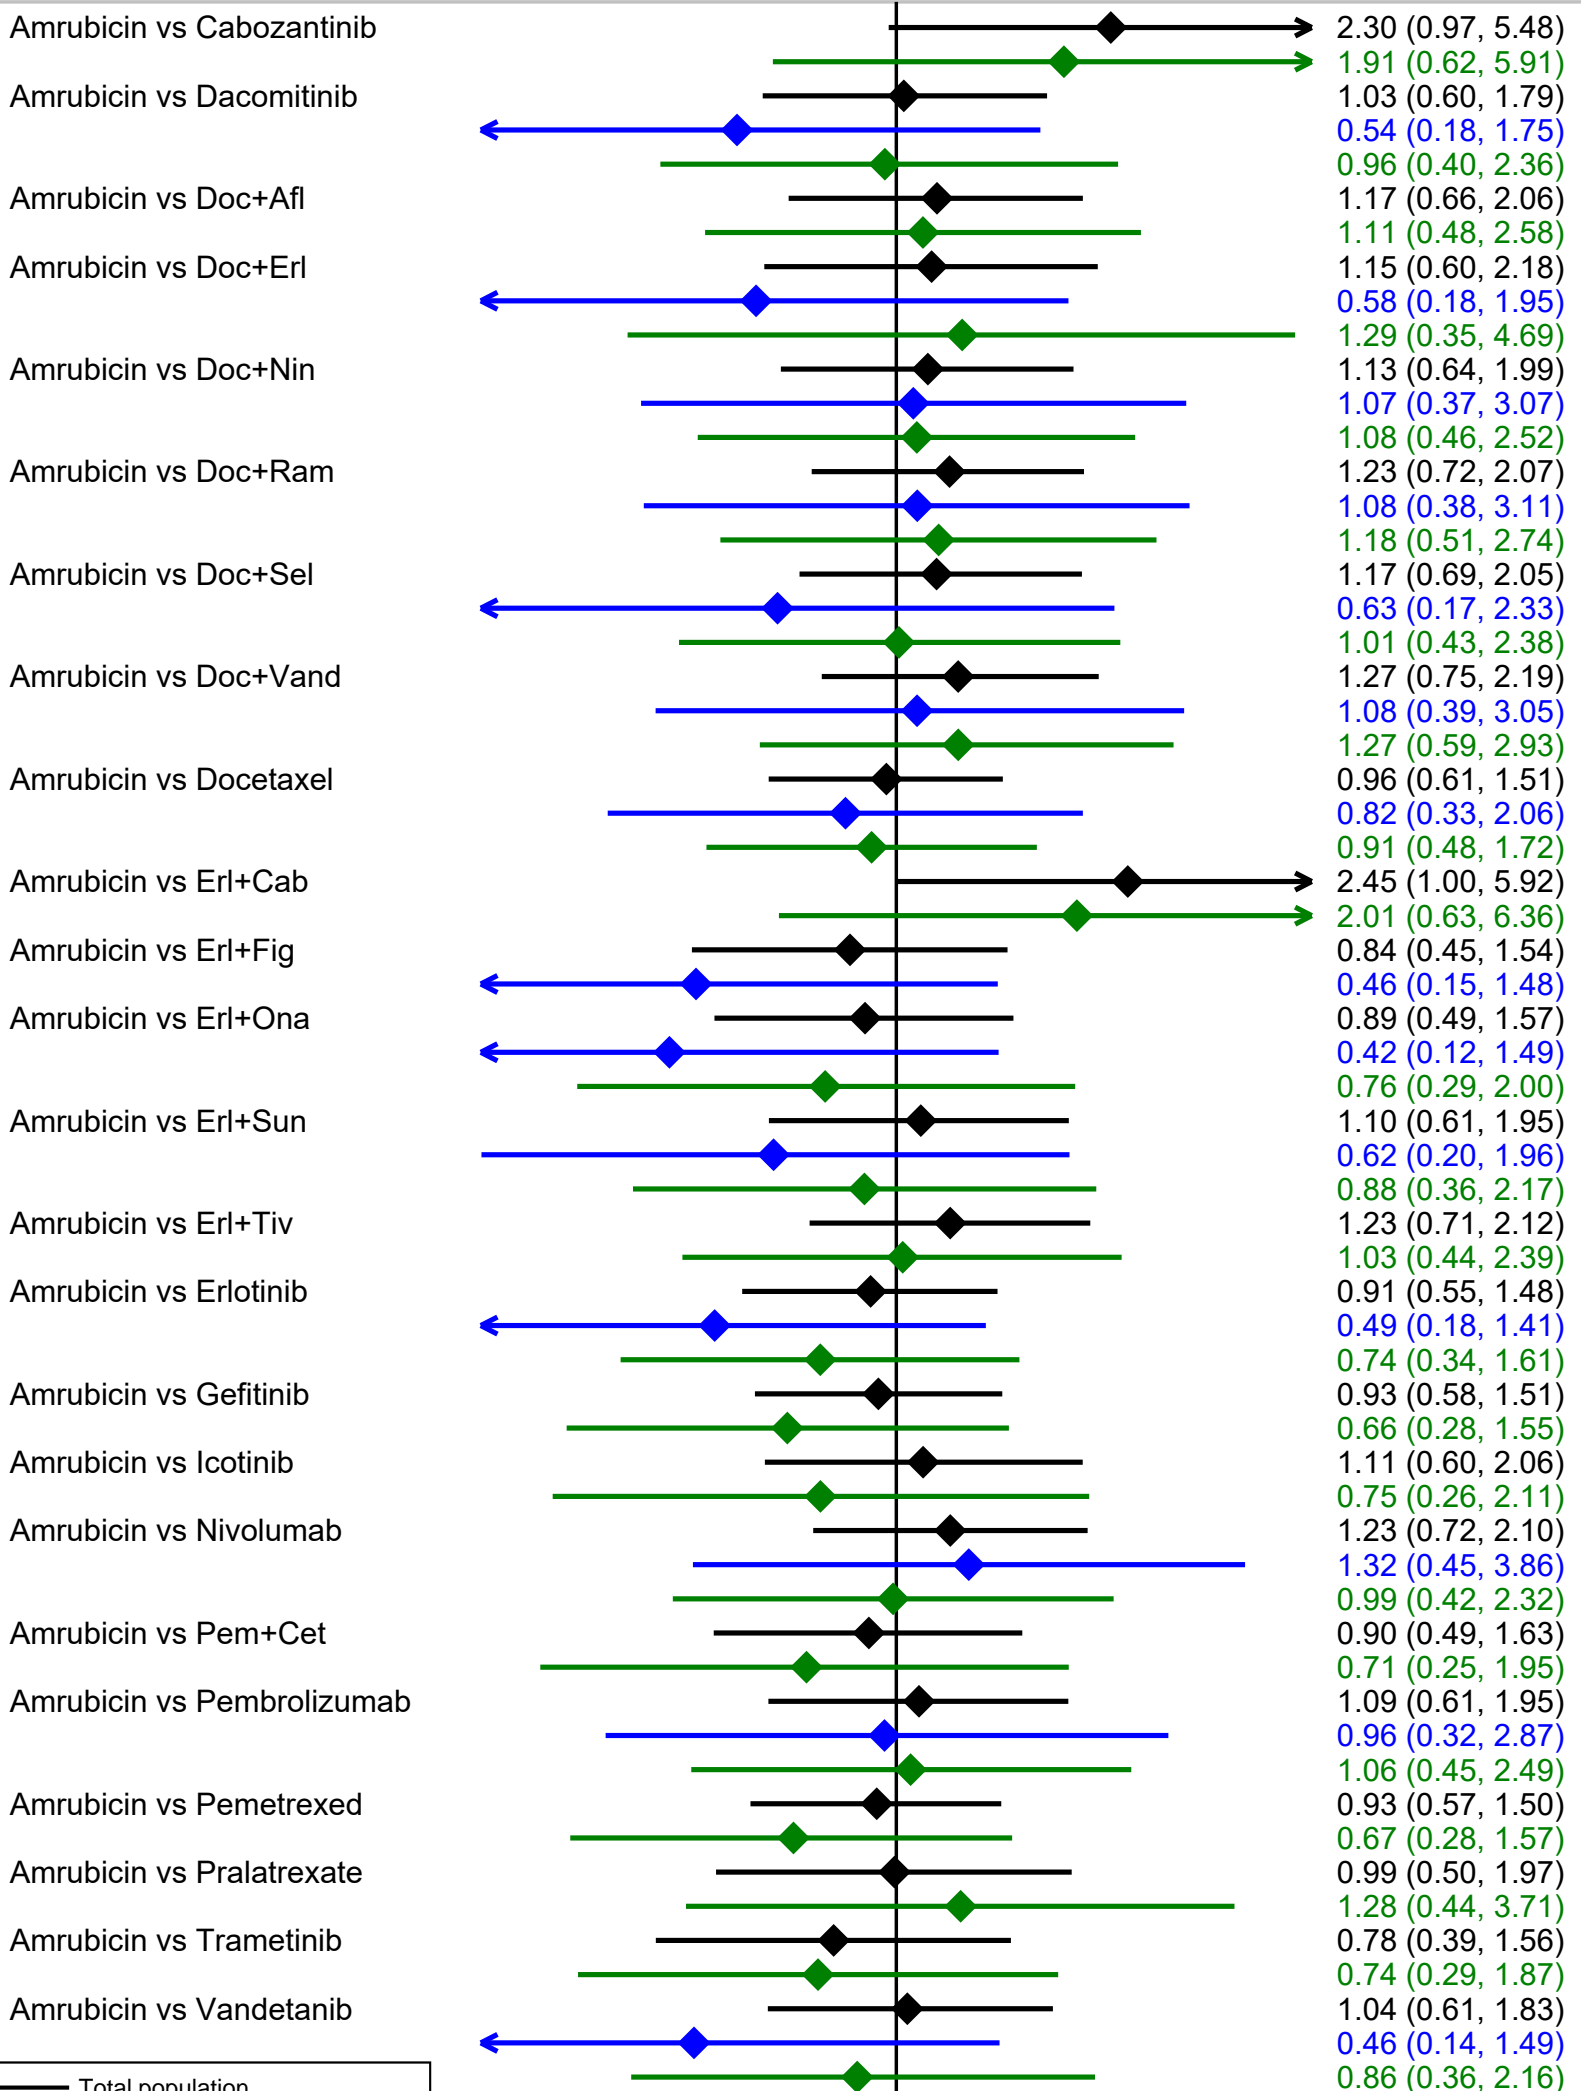

— Total population  
— Only squamous population  
— Only non-squamous population

.2 .3 .5 1 2 5

**Comparison**

**Progression Free Survival**

**HR (95% CrI)**

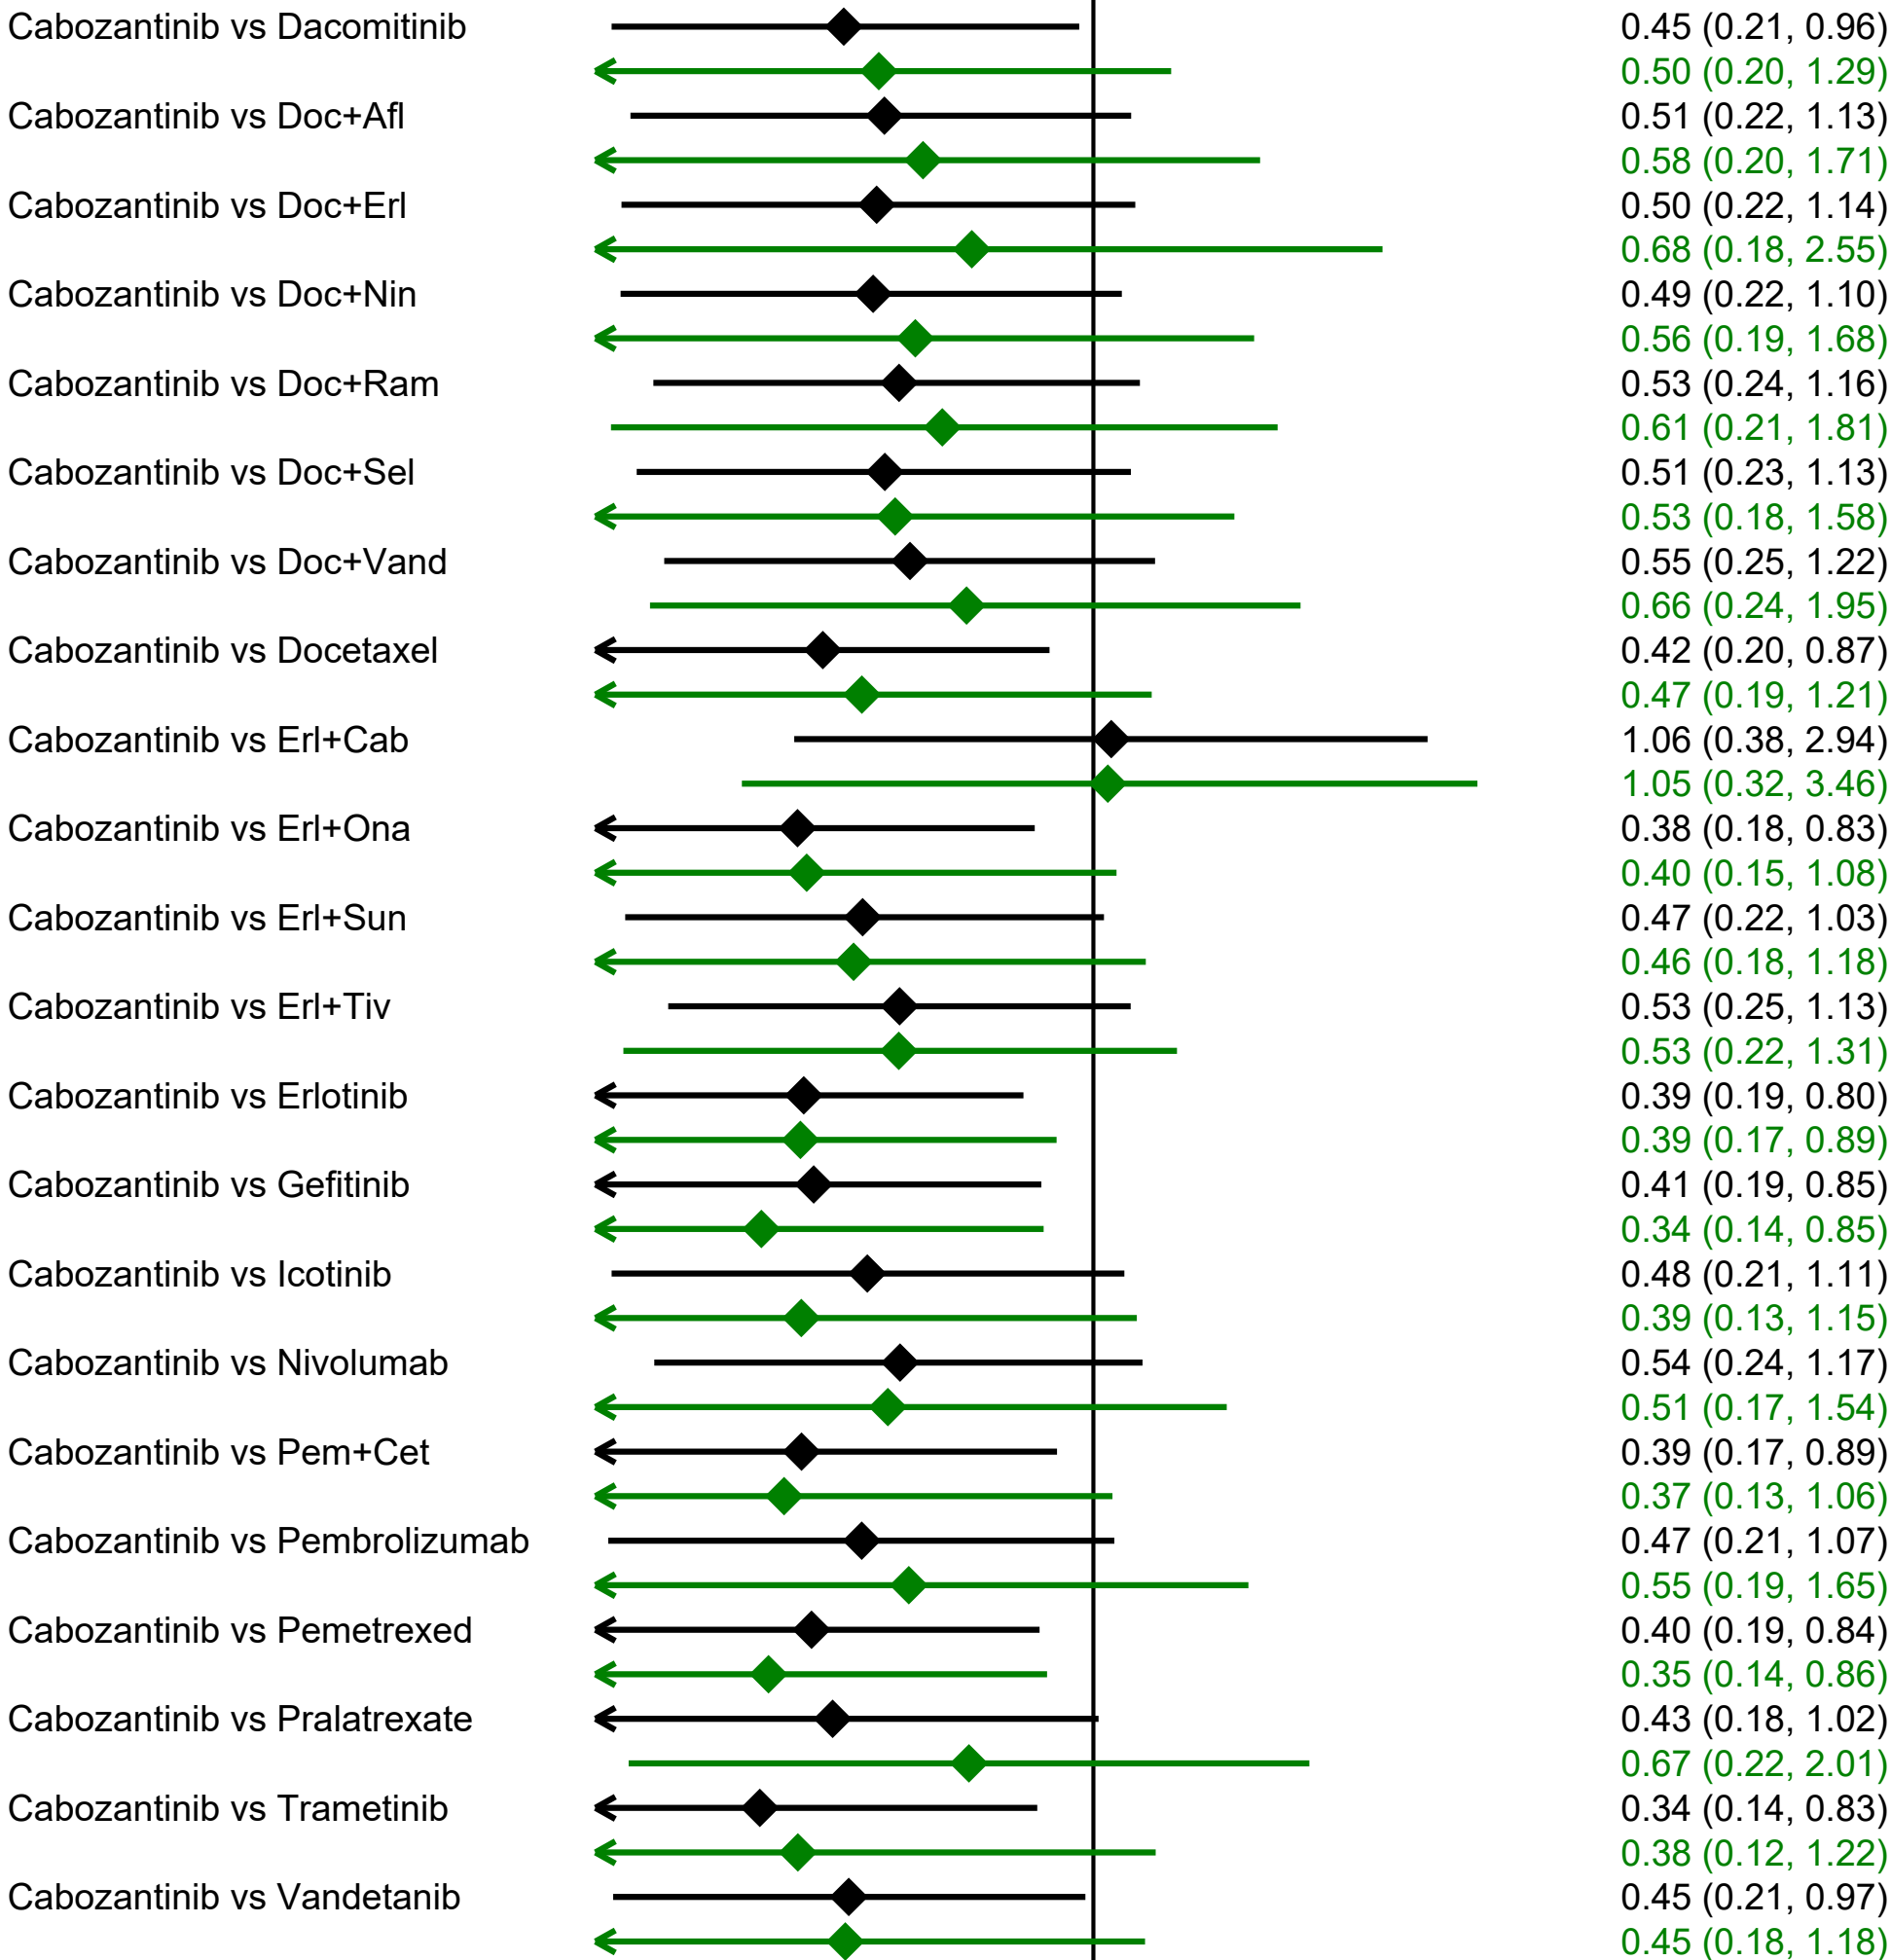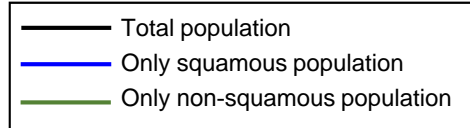

.2 .3 .5 1 2 5

**Comparison**

**Progression Free Survival**

**HR (95% CrI)**

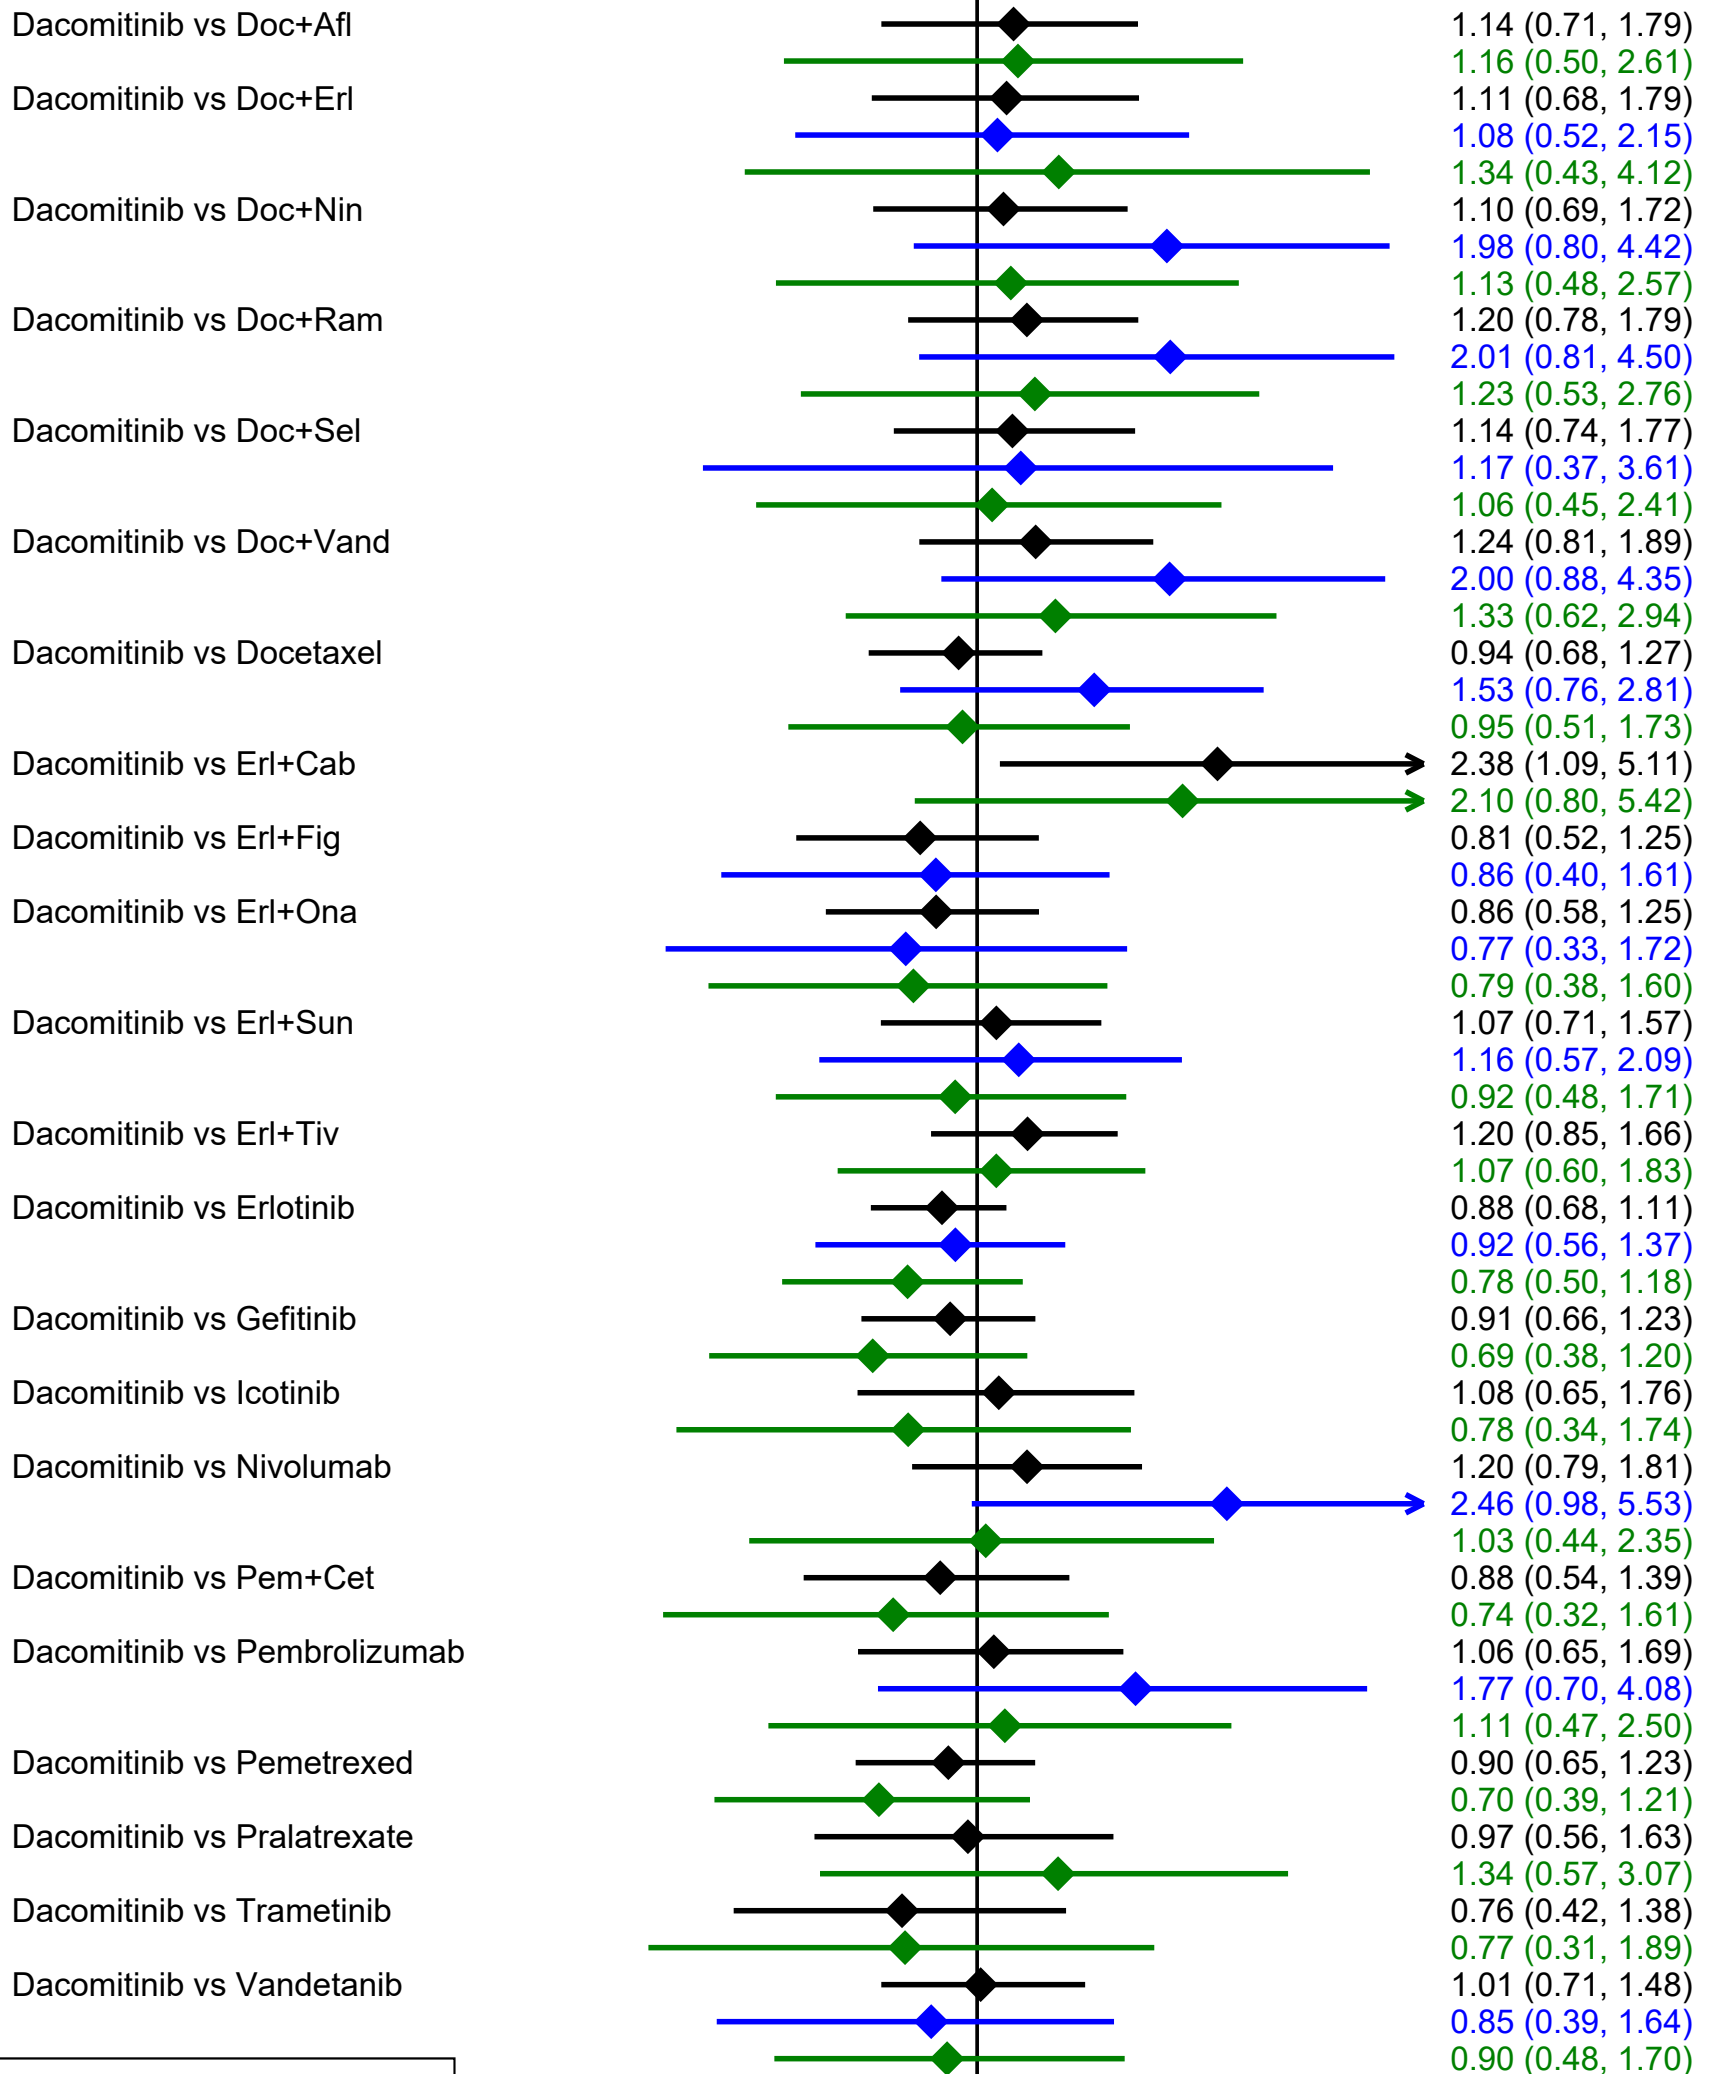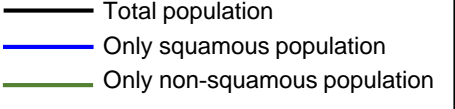

.2 .3 .5 1 2 5

**Comparison**

**Progression Free Survival**

**HR (95% CrI)**

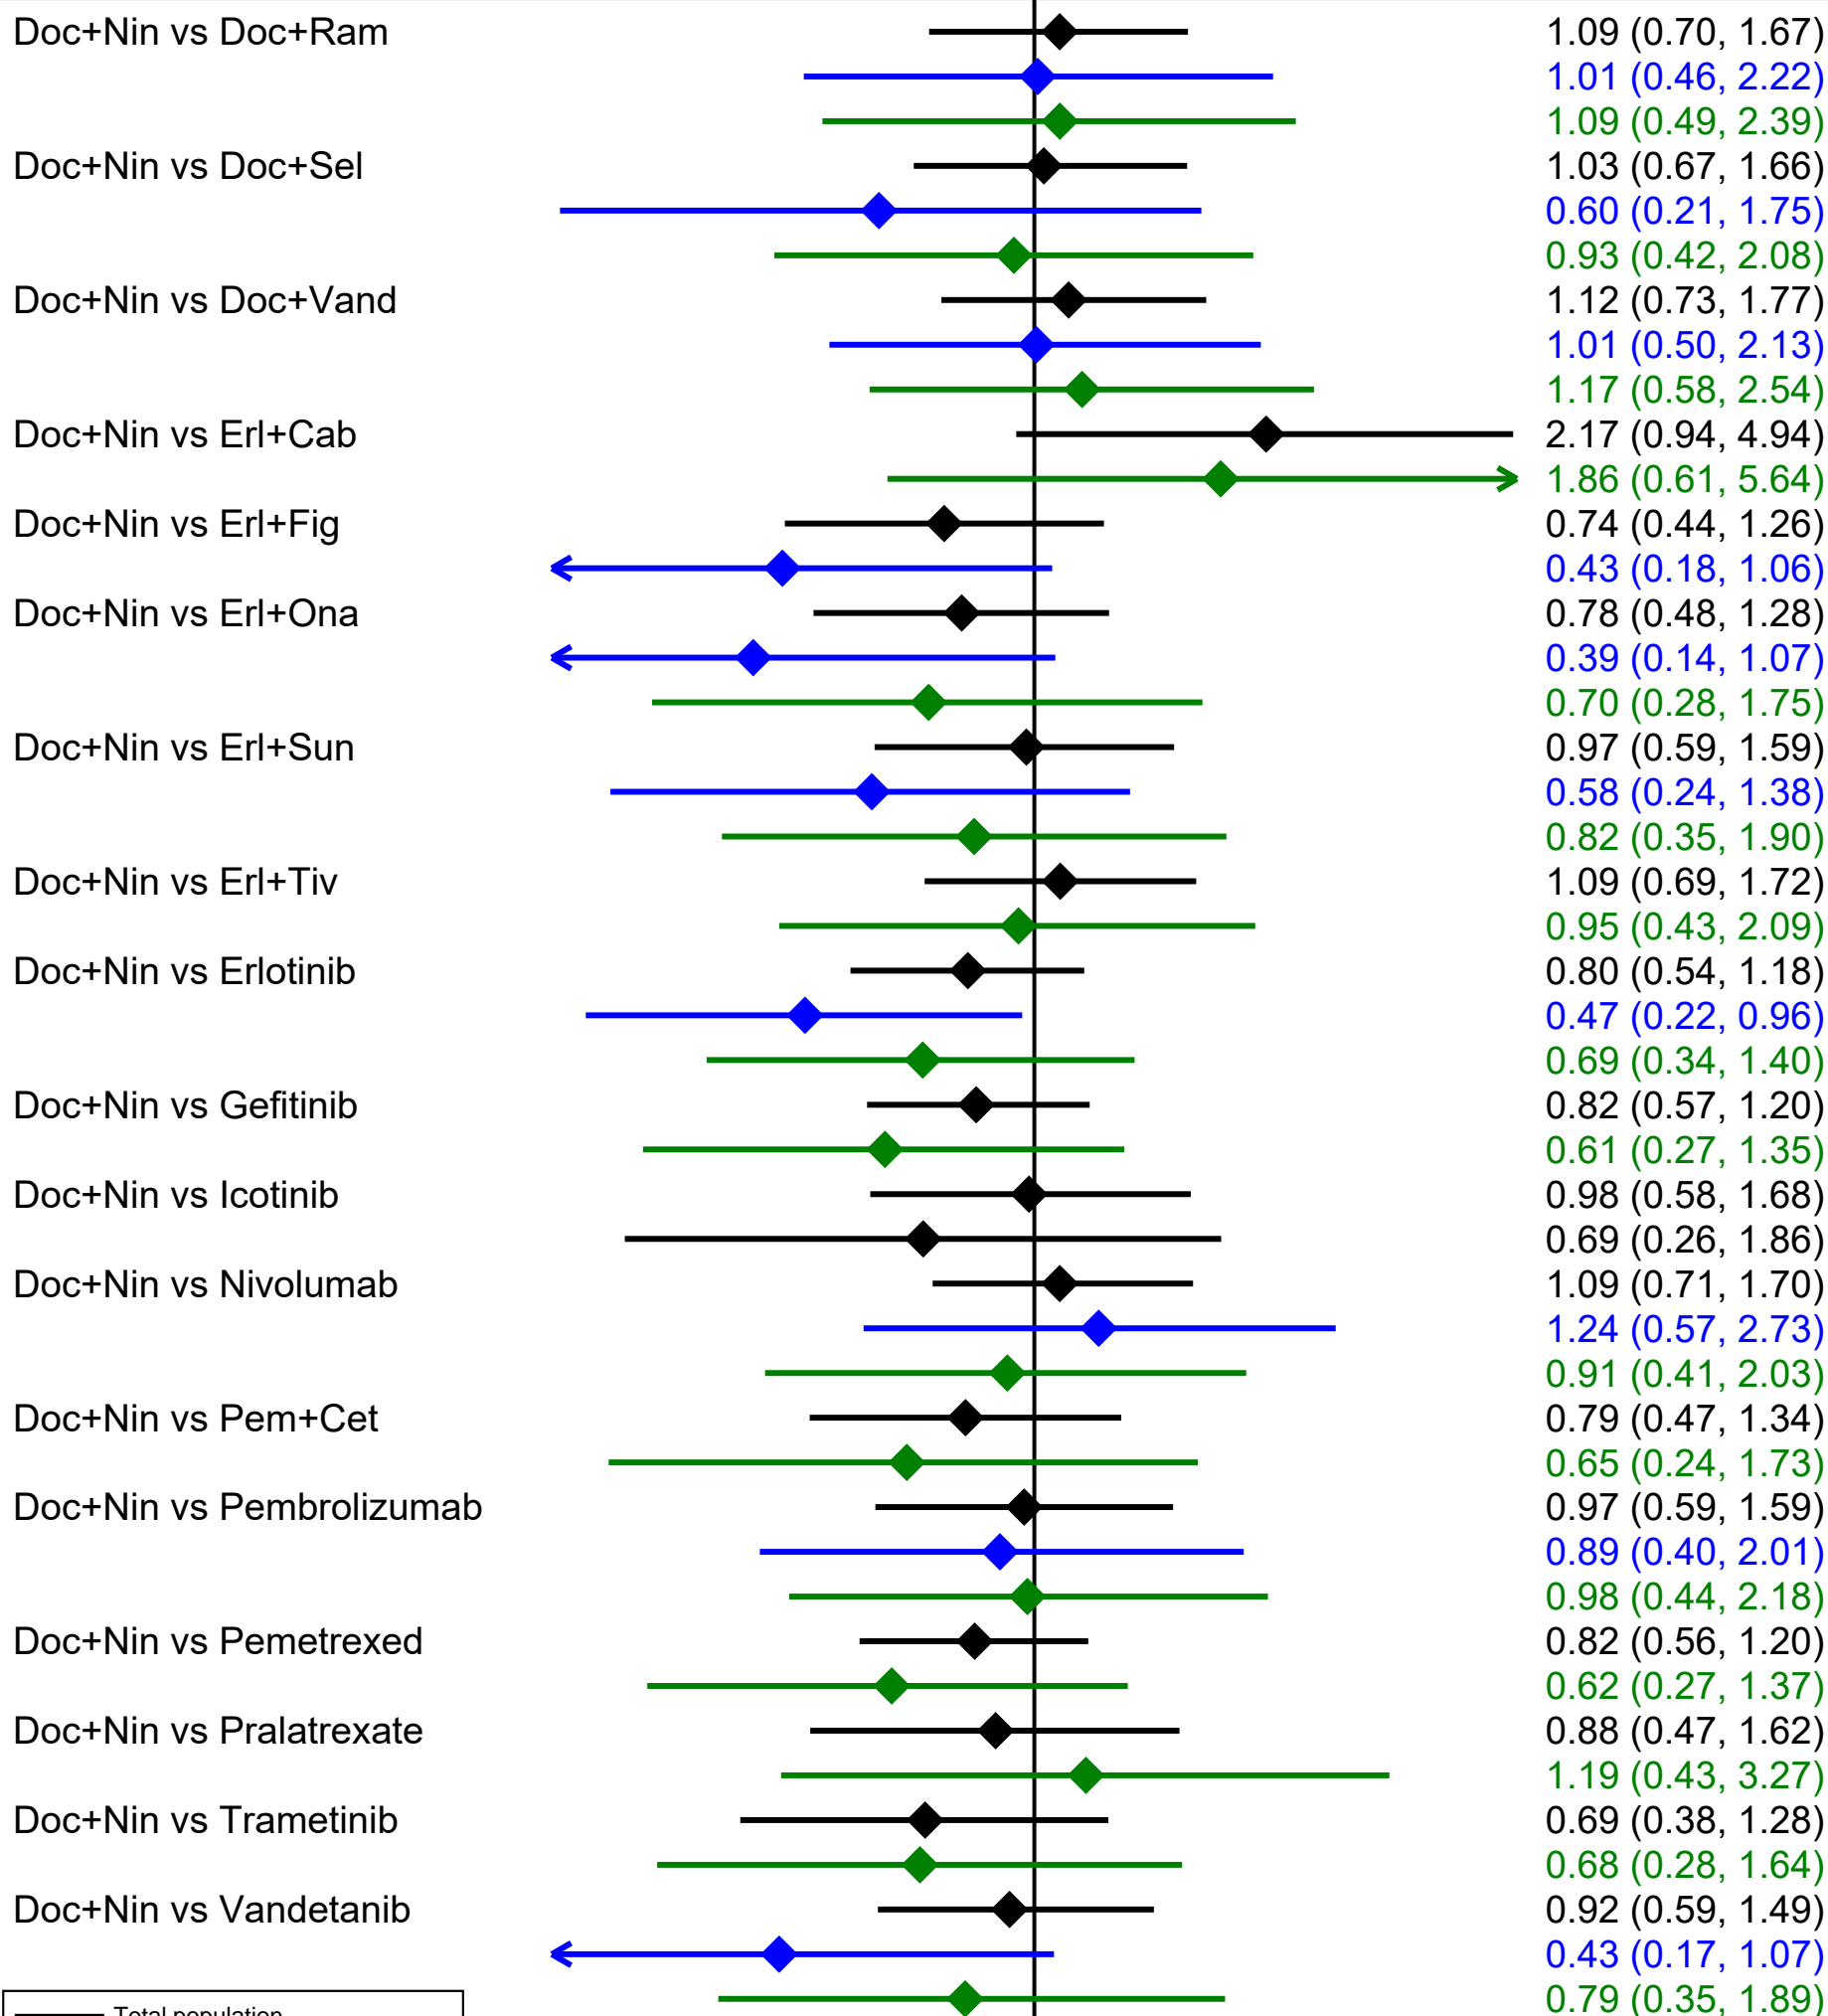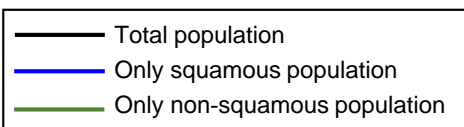

.2 .3 .5 1 2 5



**Comparison**

**Progression Free Survival**

**HR (95% CrI)**

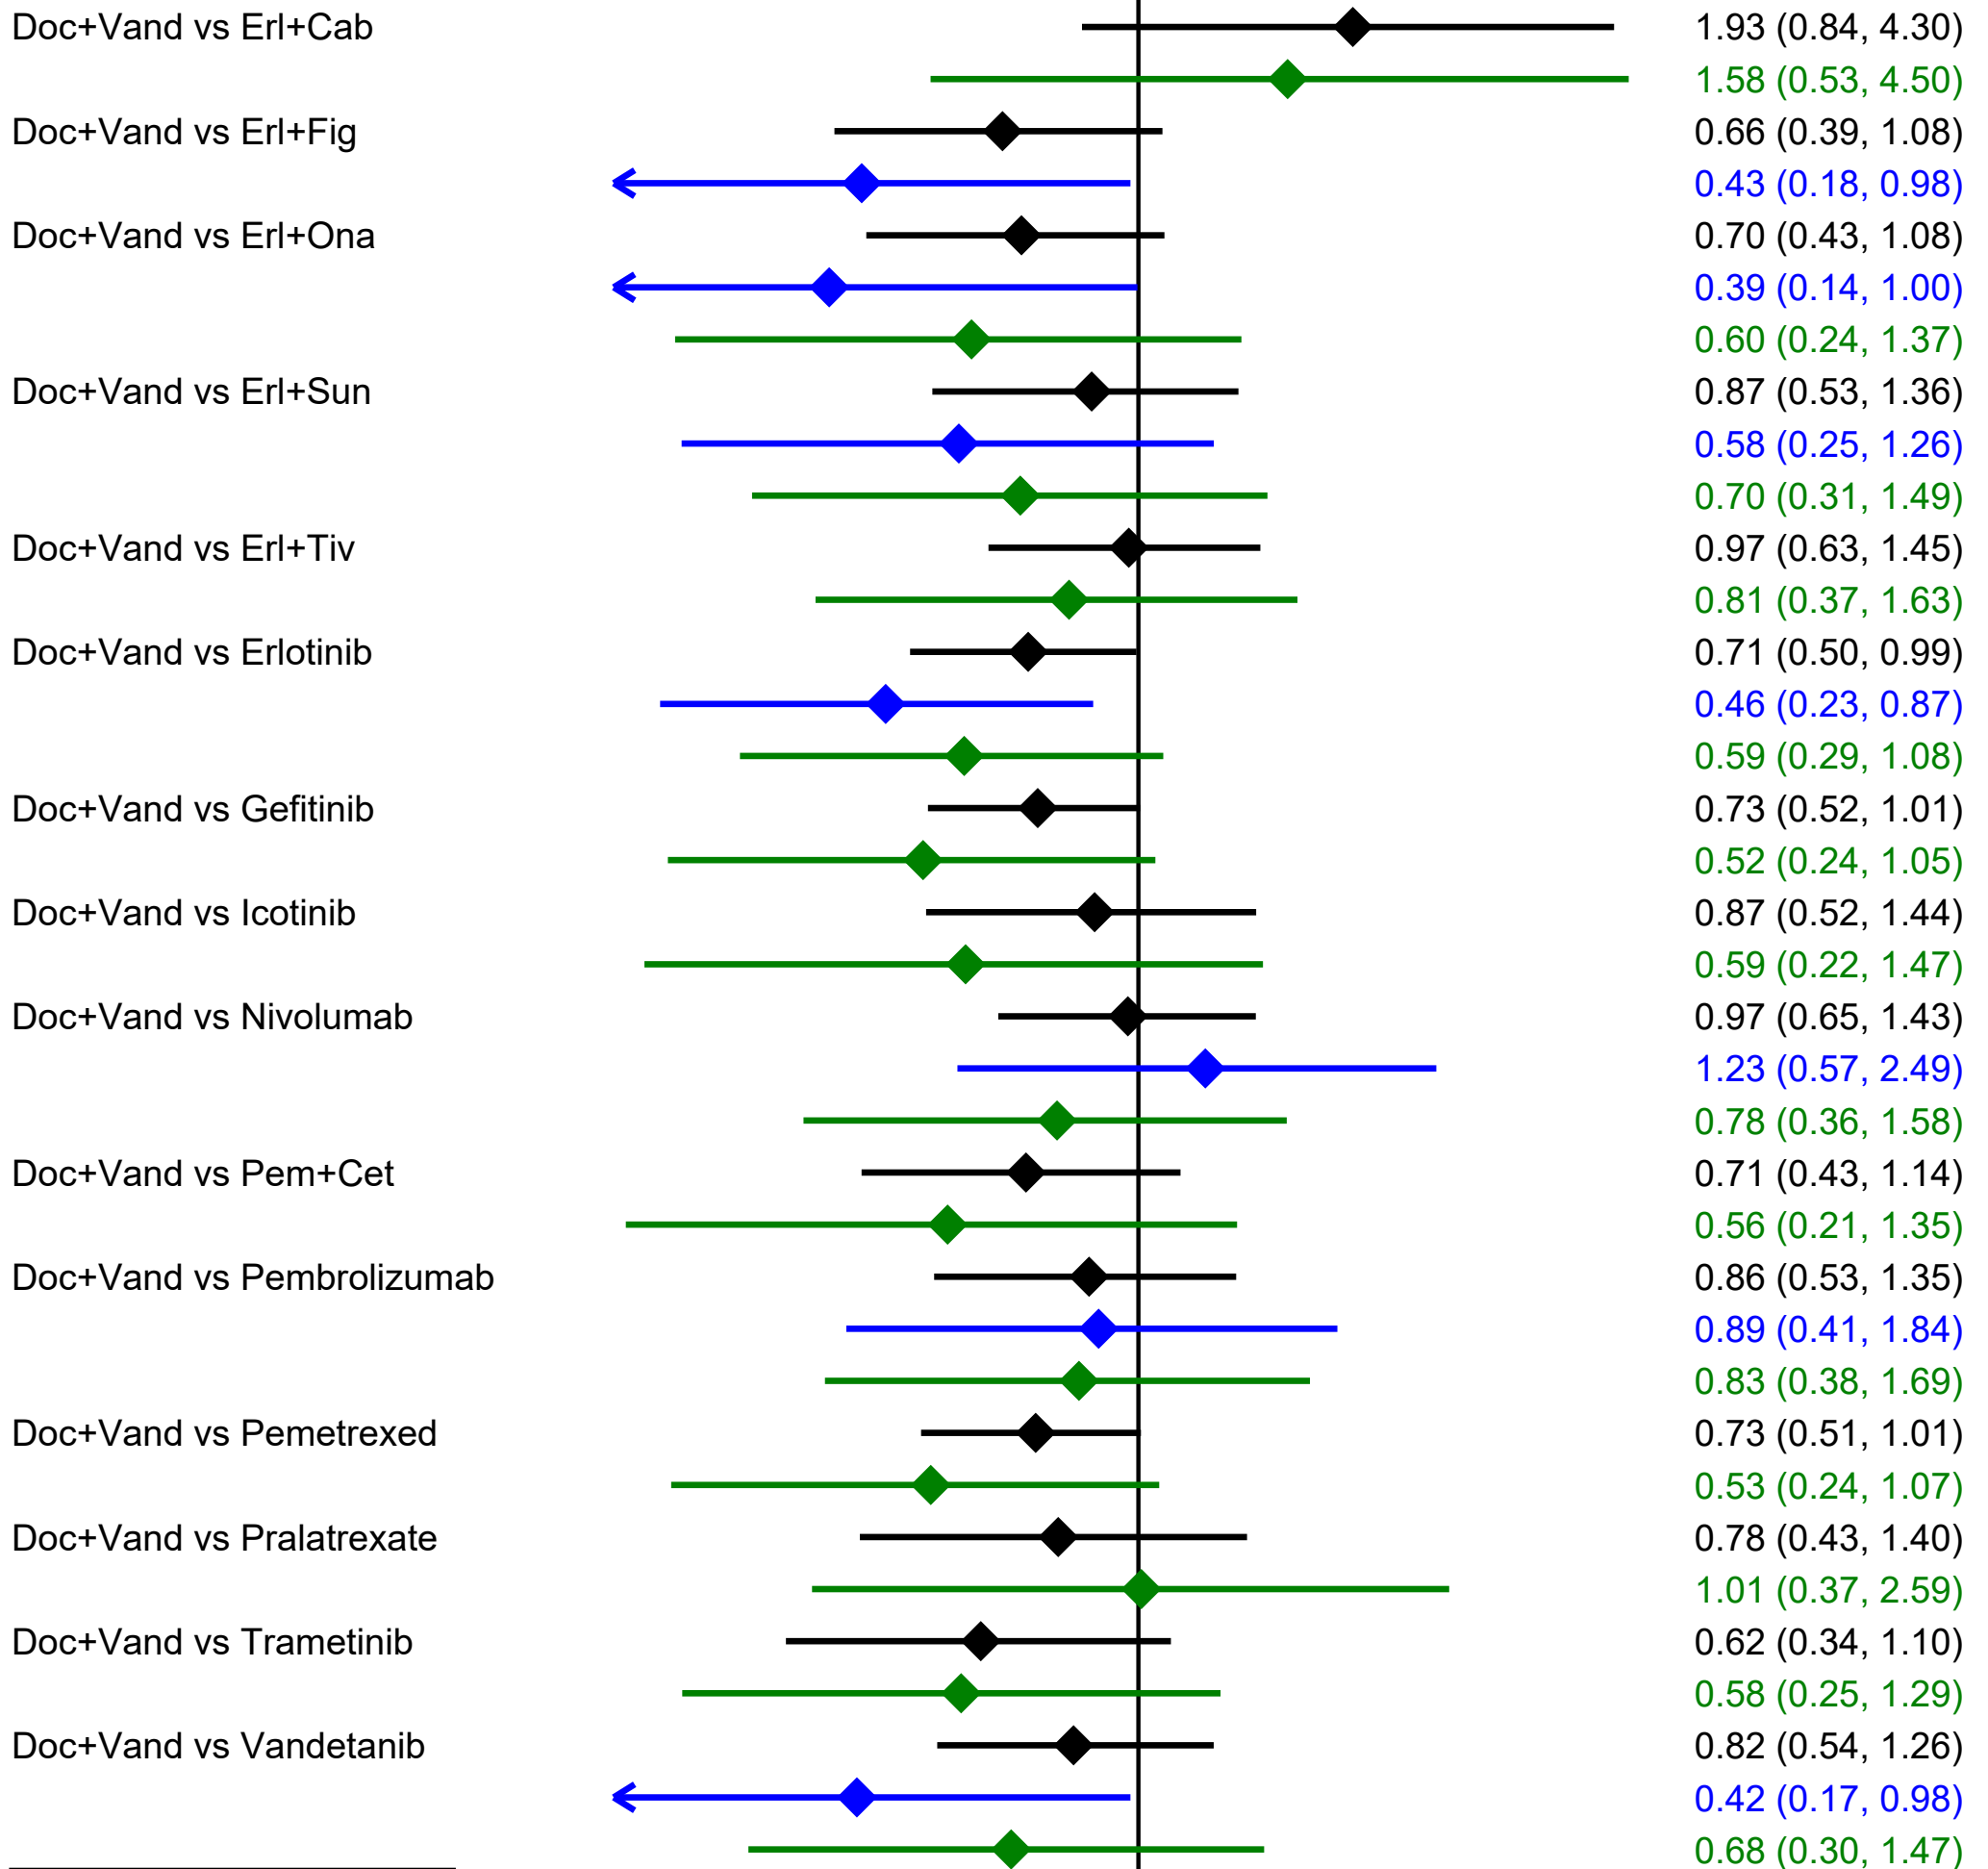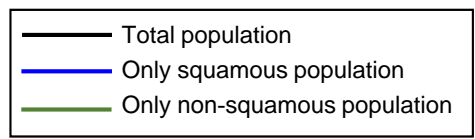

.2 .3 .5 1 2 5

Comparison

# Progression Free Survival

HR (95% CrI)

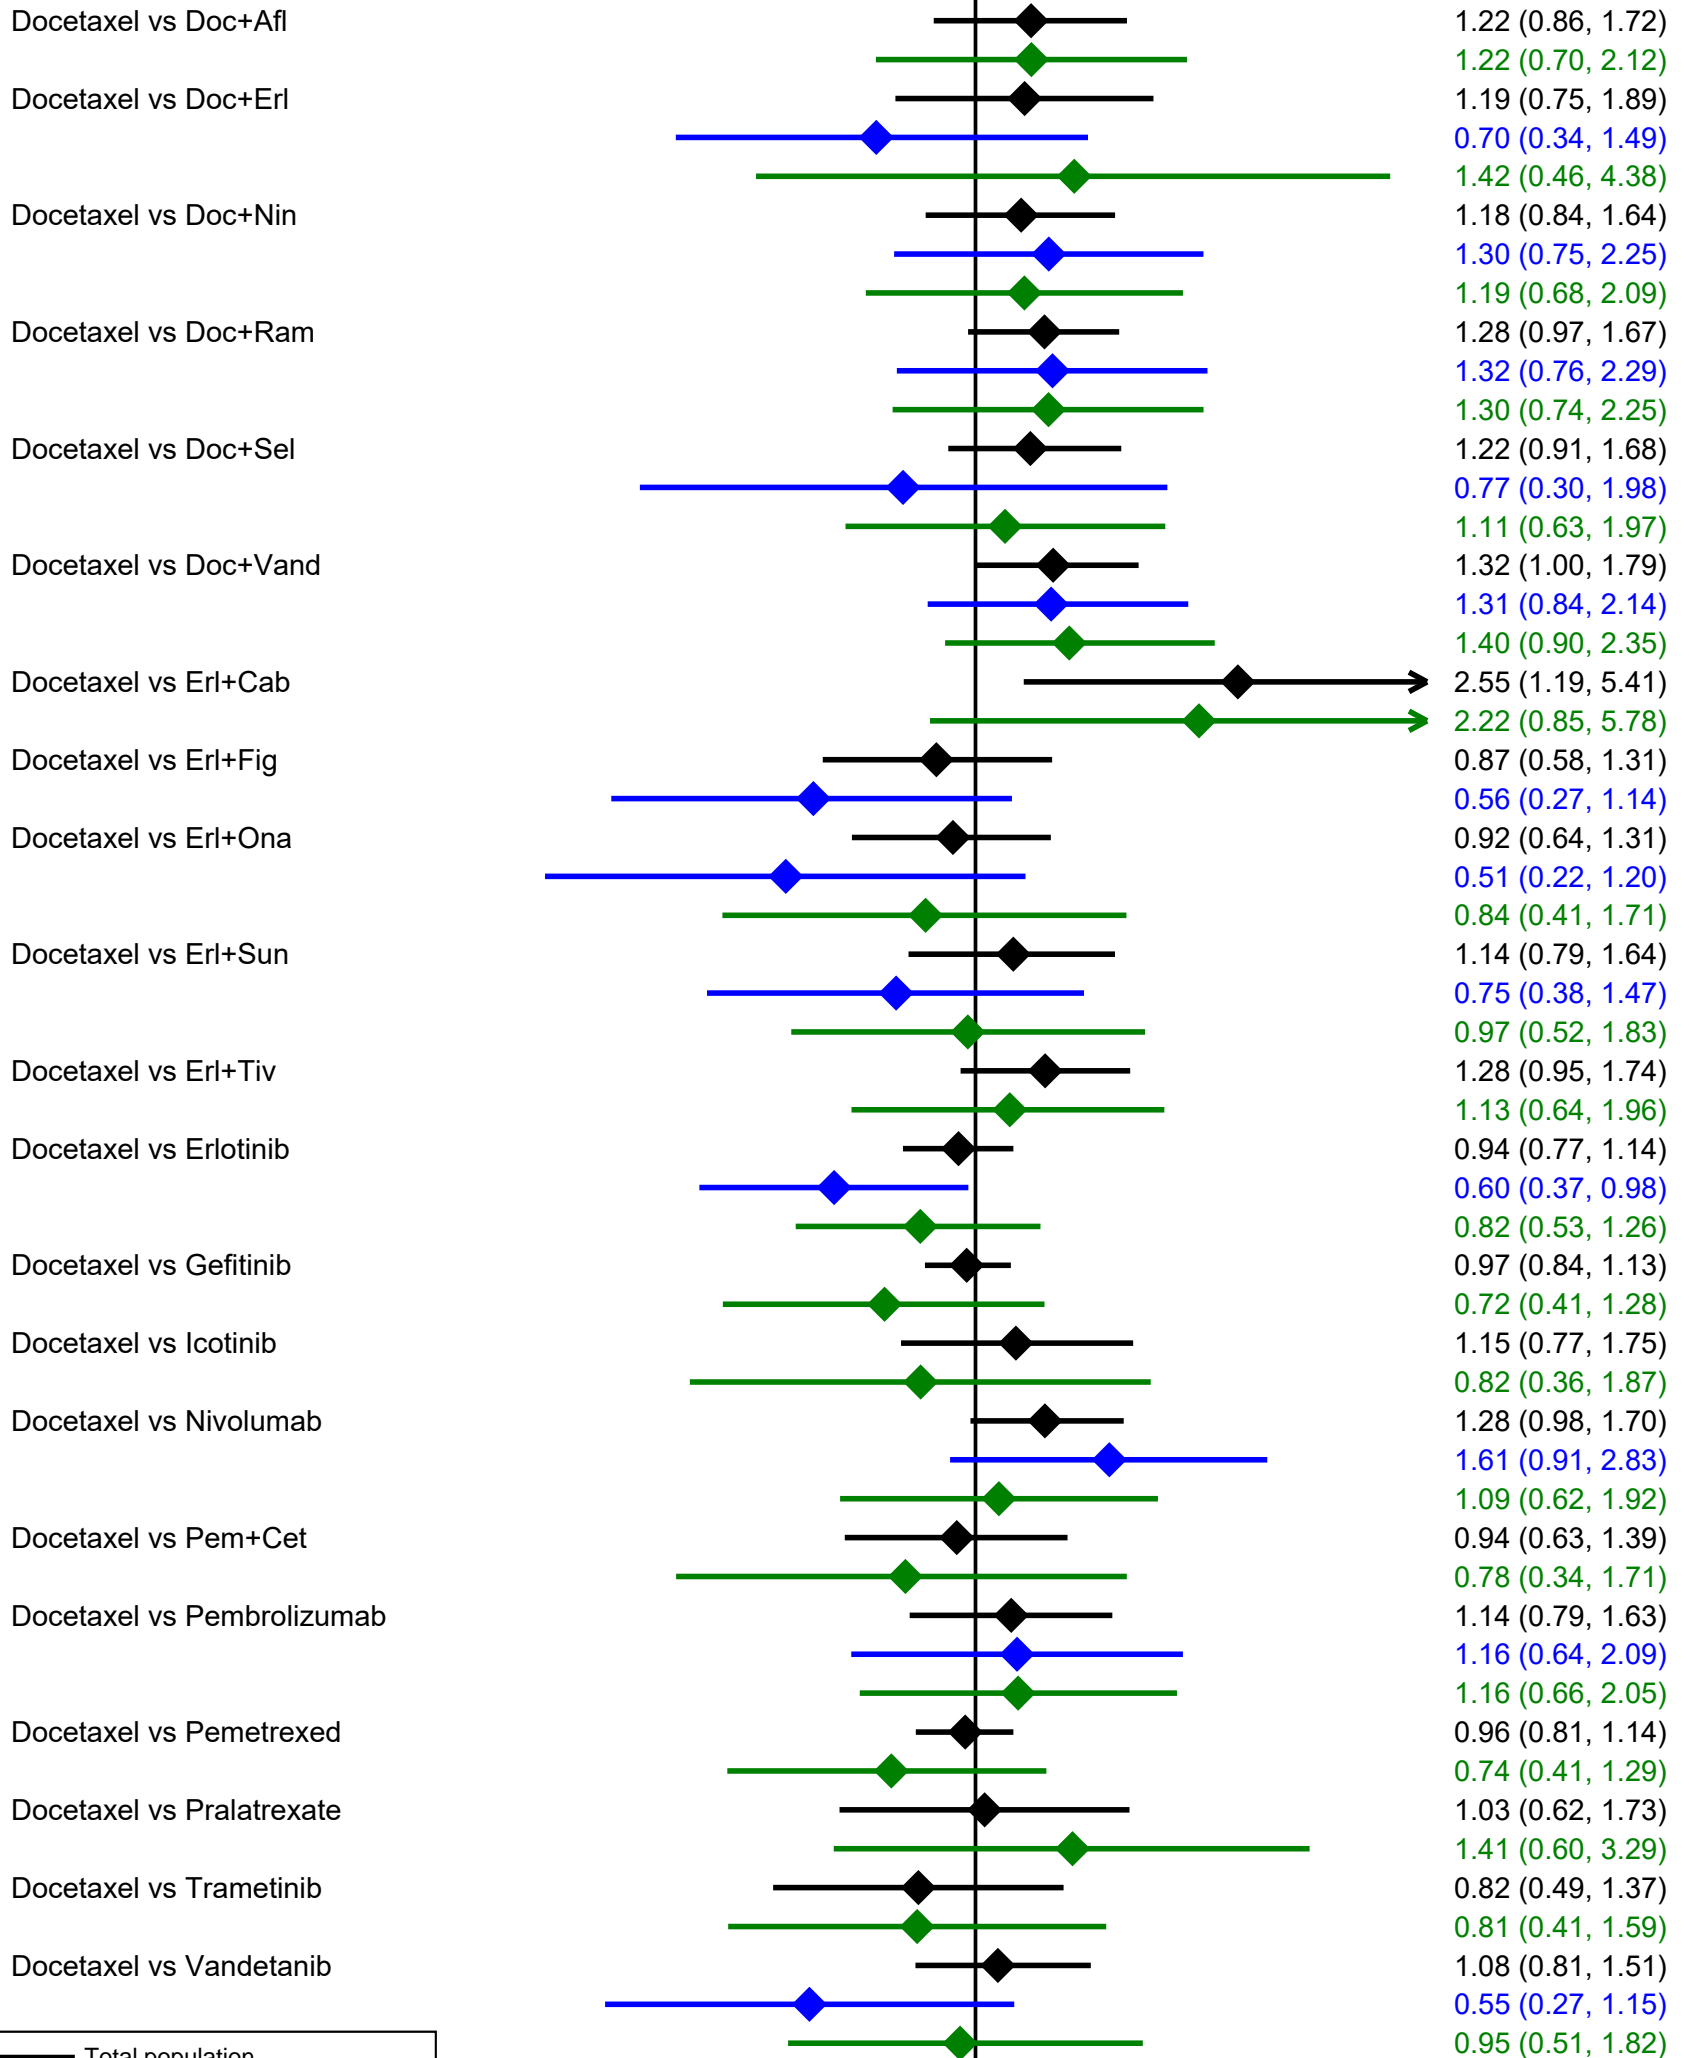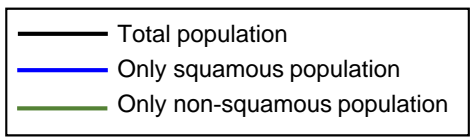

.2 .3 .5 1 2 5

Comparison

Progression Free Survival

HR (95% CrI)

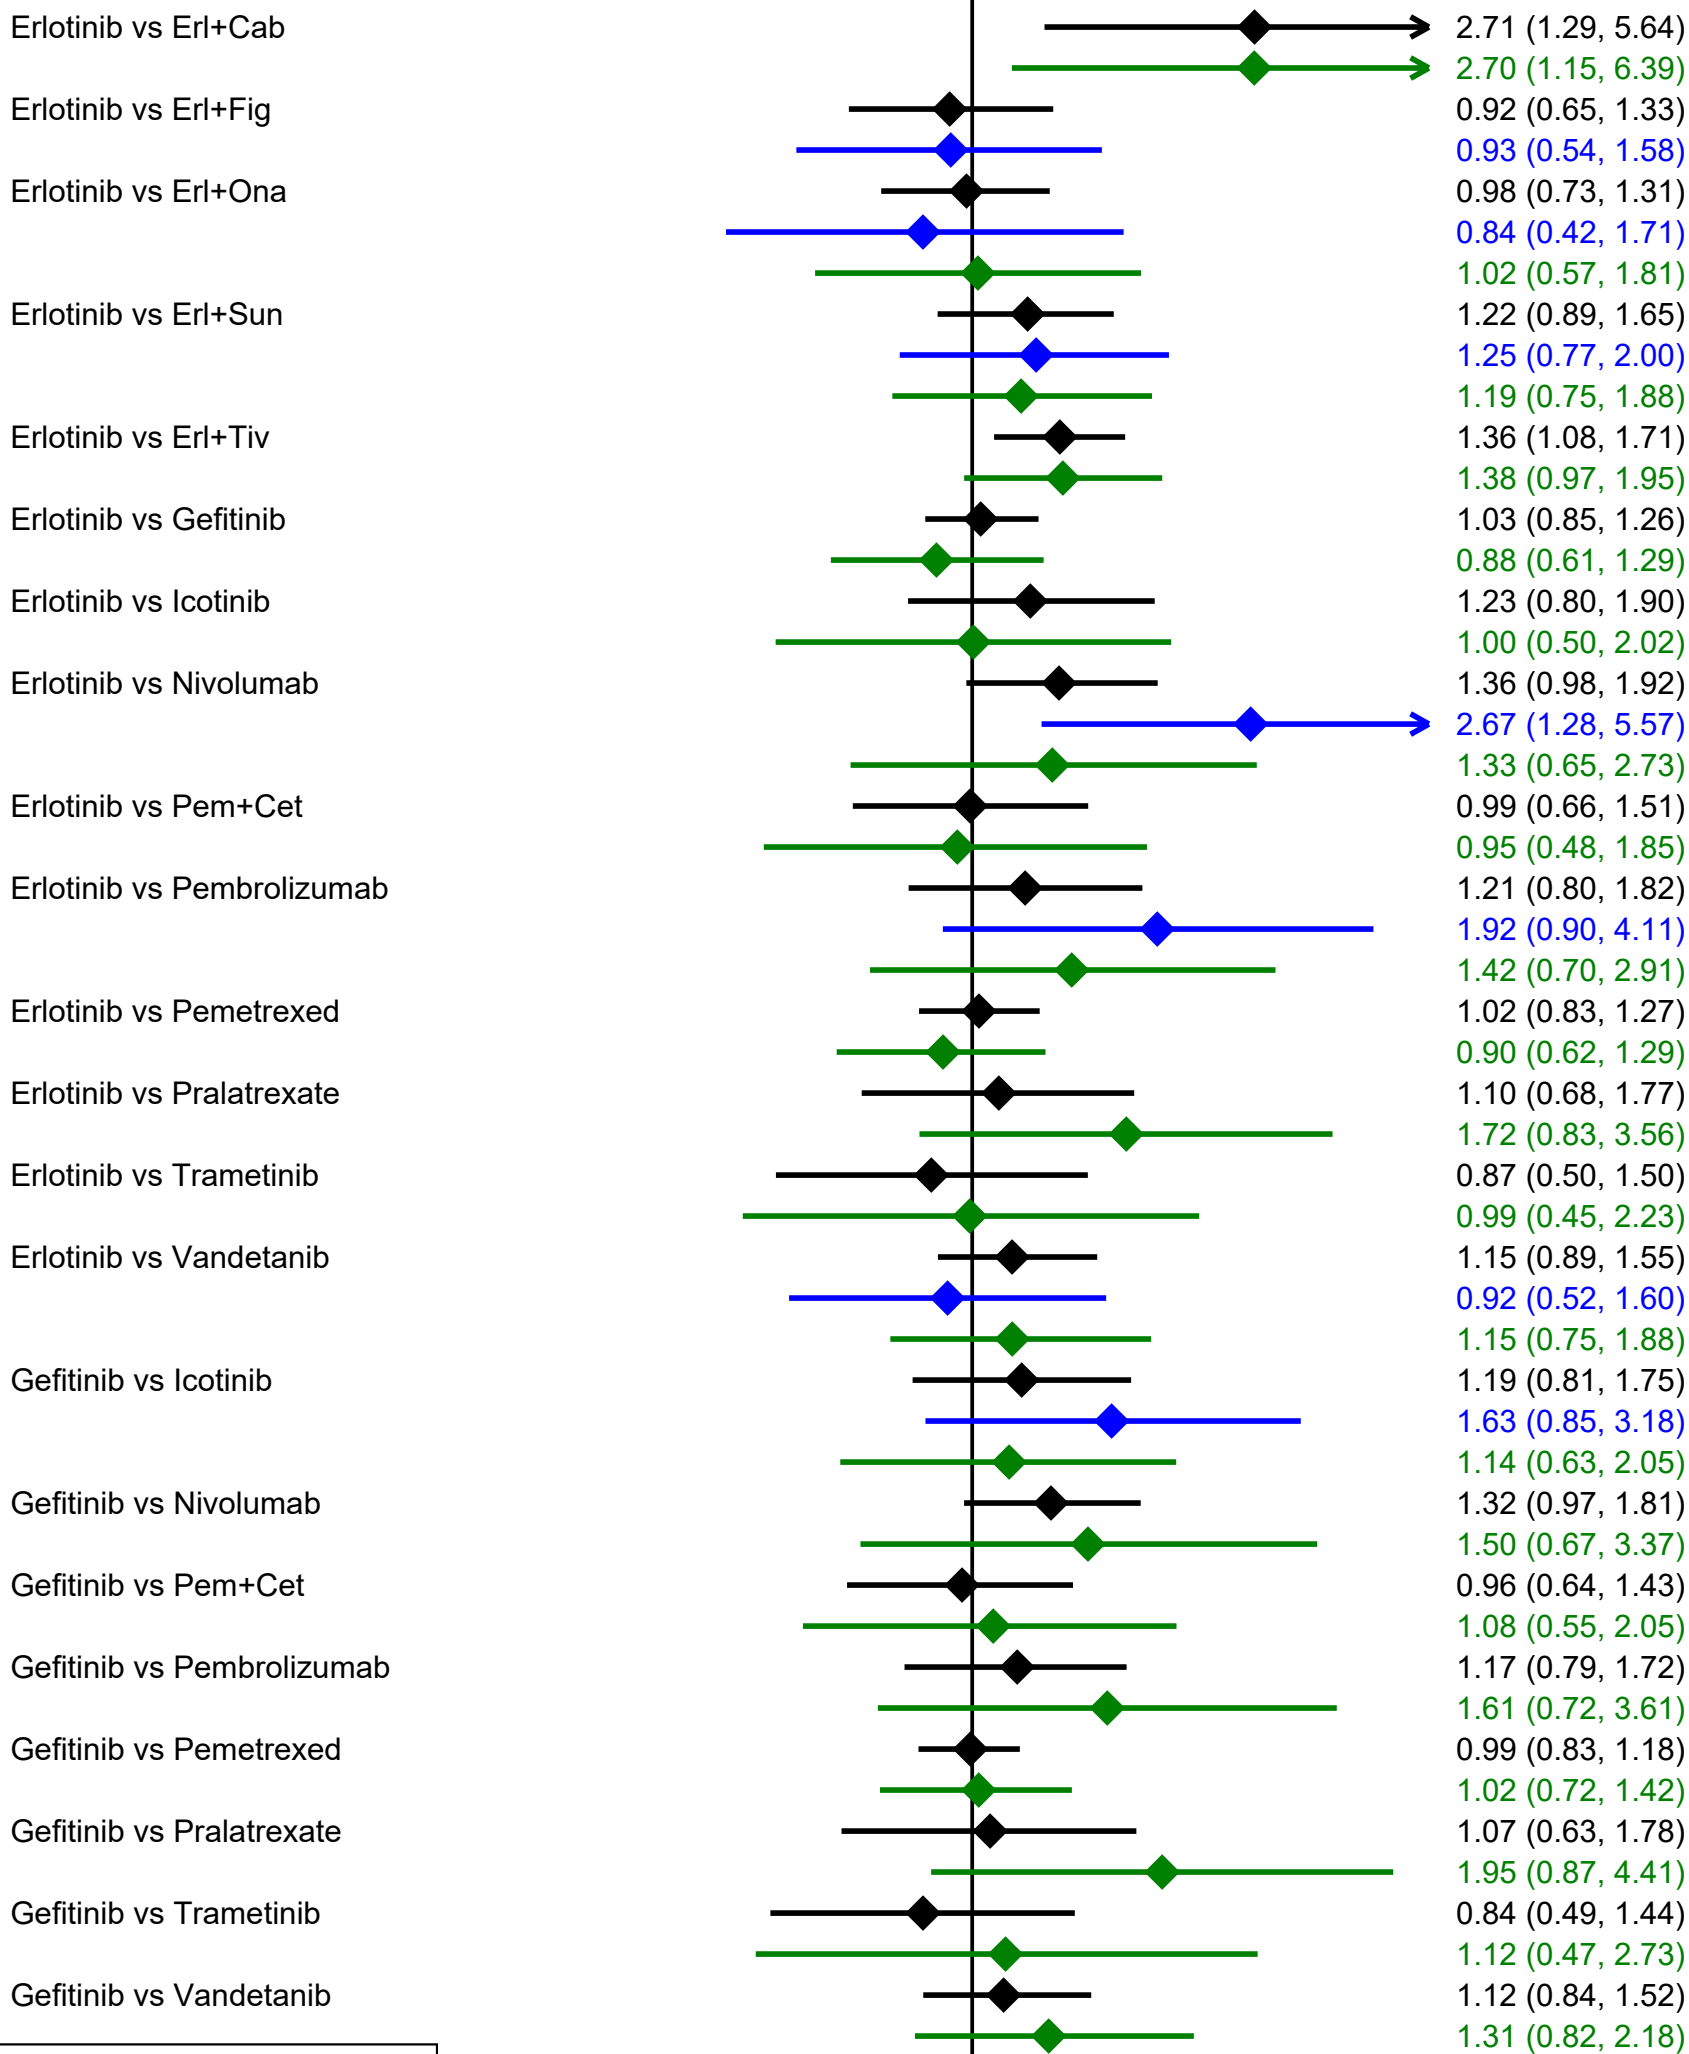

— Total population  
— Only squamous population  
— Only non-squamous population

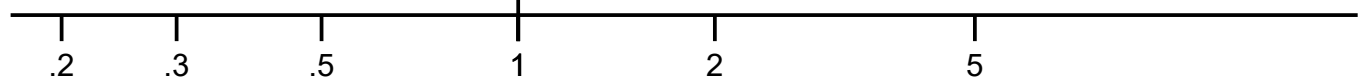

**Comparison**

**Progression Free Survival**

**HR (95% CrI)**

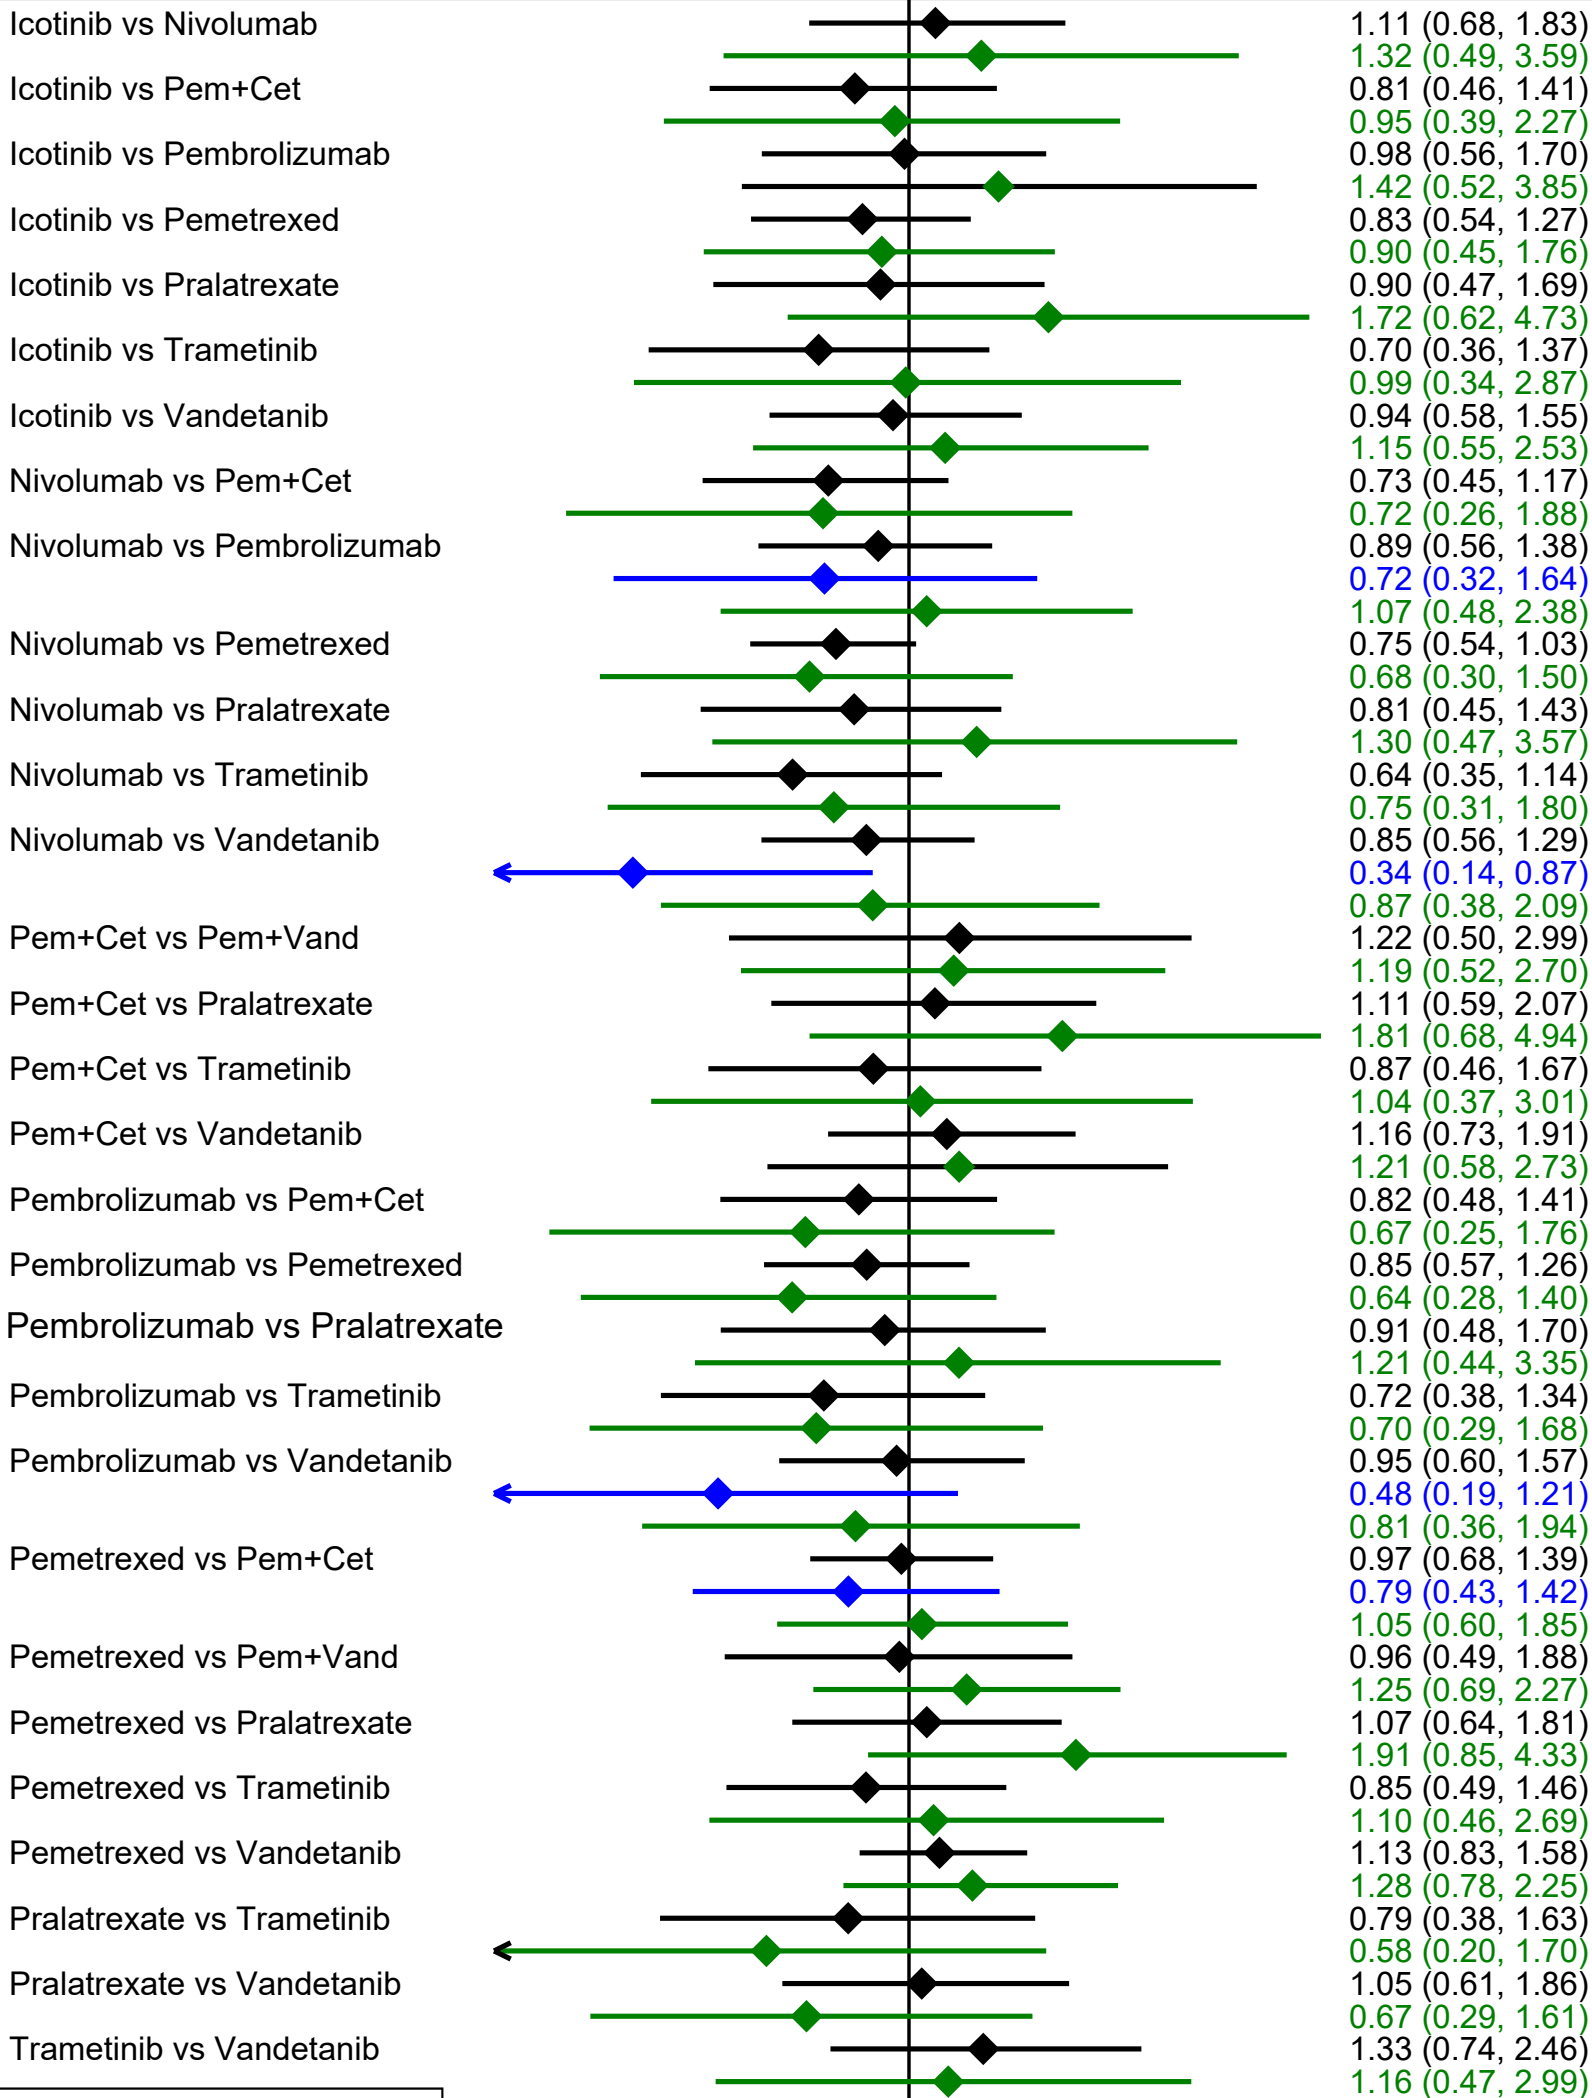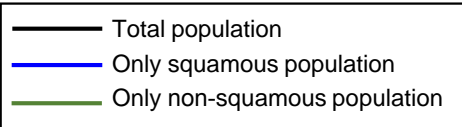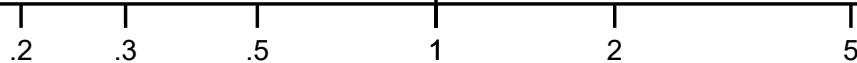

# Overall Survival

Comparison

HR (95% CrI)

*Favors first treatment* ← *Favors second treatment*

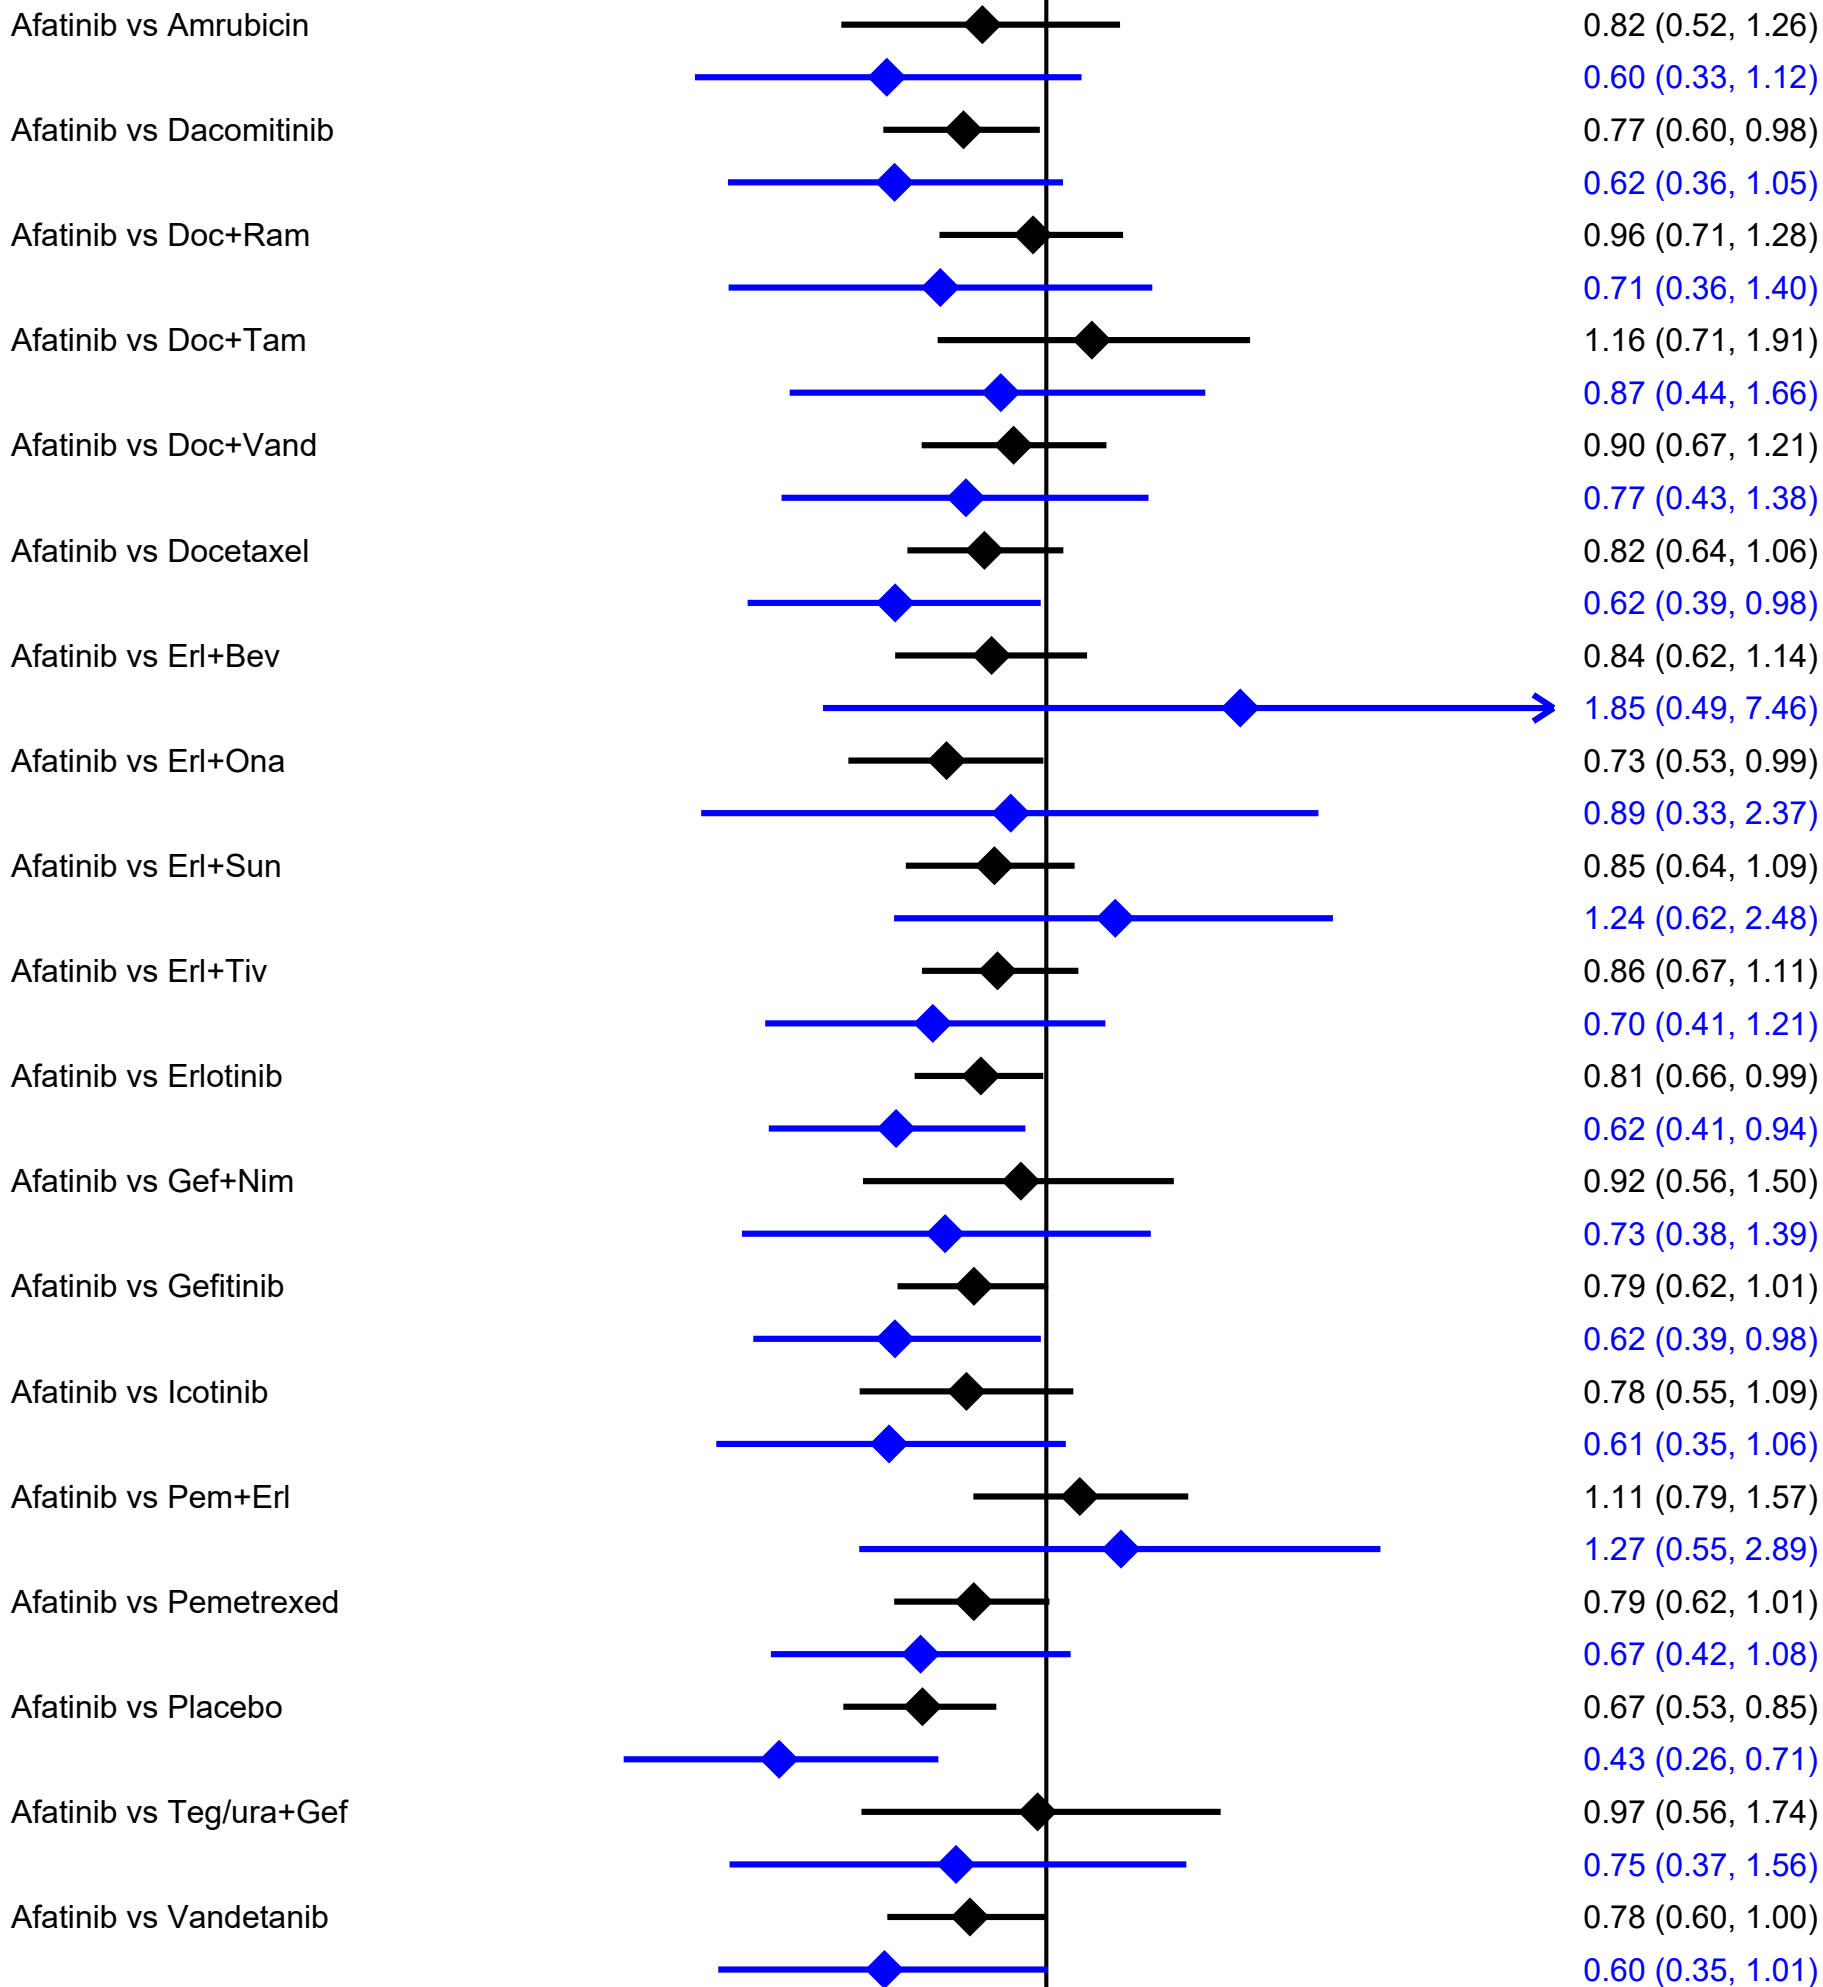

— Total population  
— Only Asian population

.2 .3 .5 1 2 5

**Comparison**

**Overall Survival**

**HR (95% CrI)**

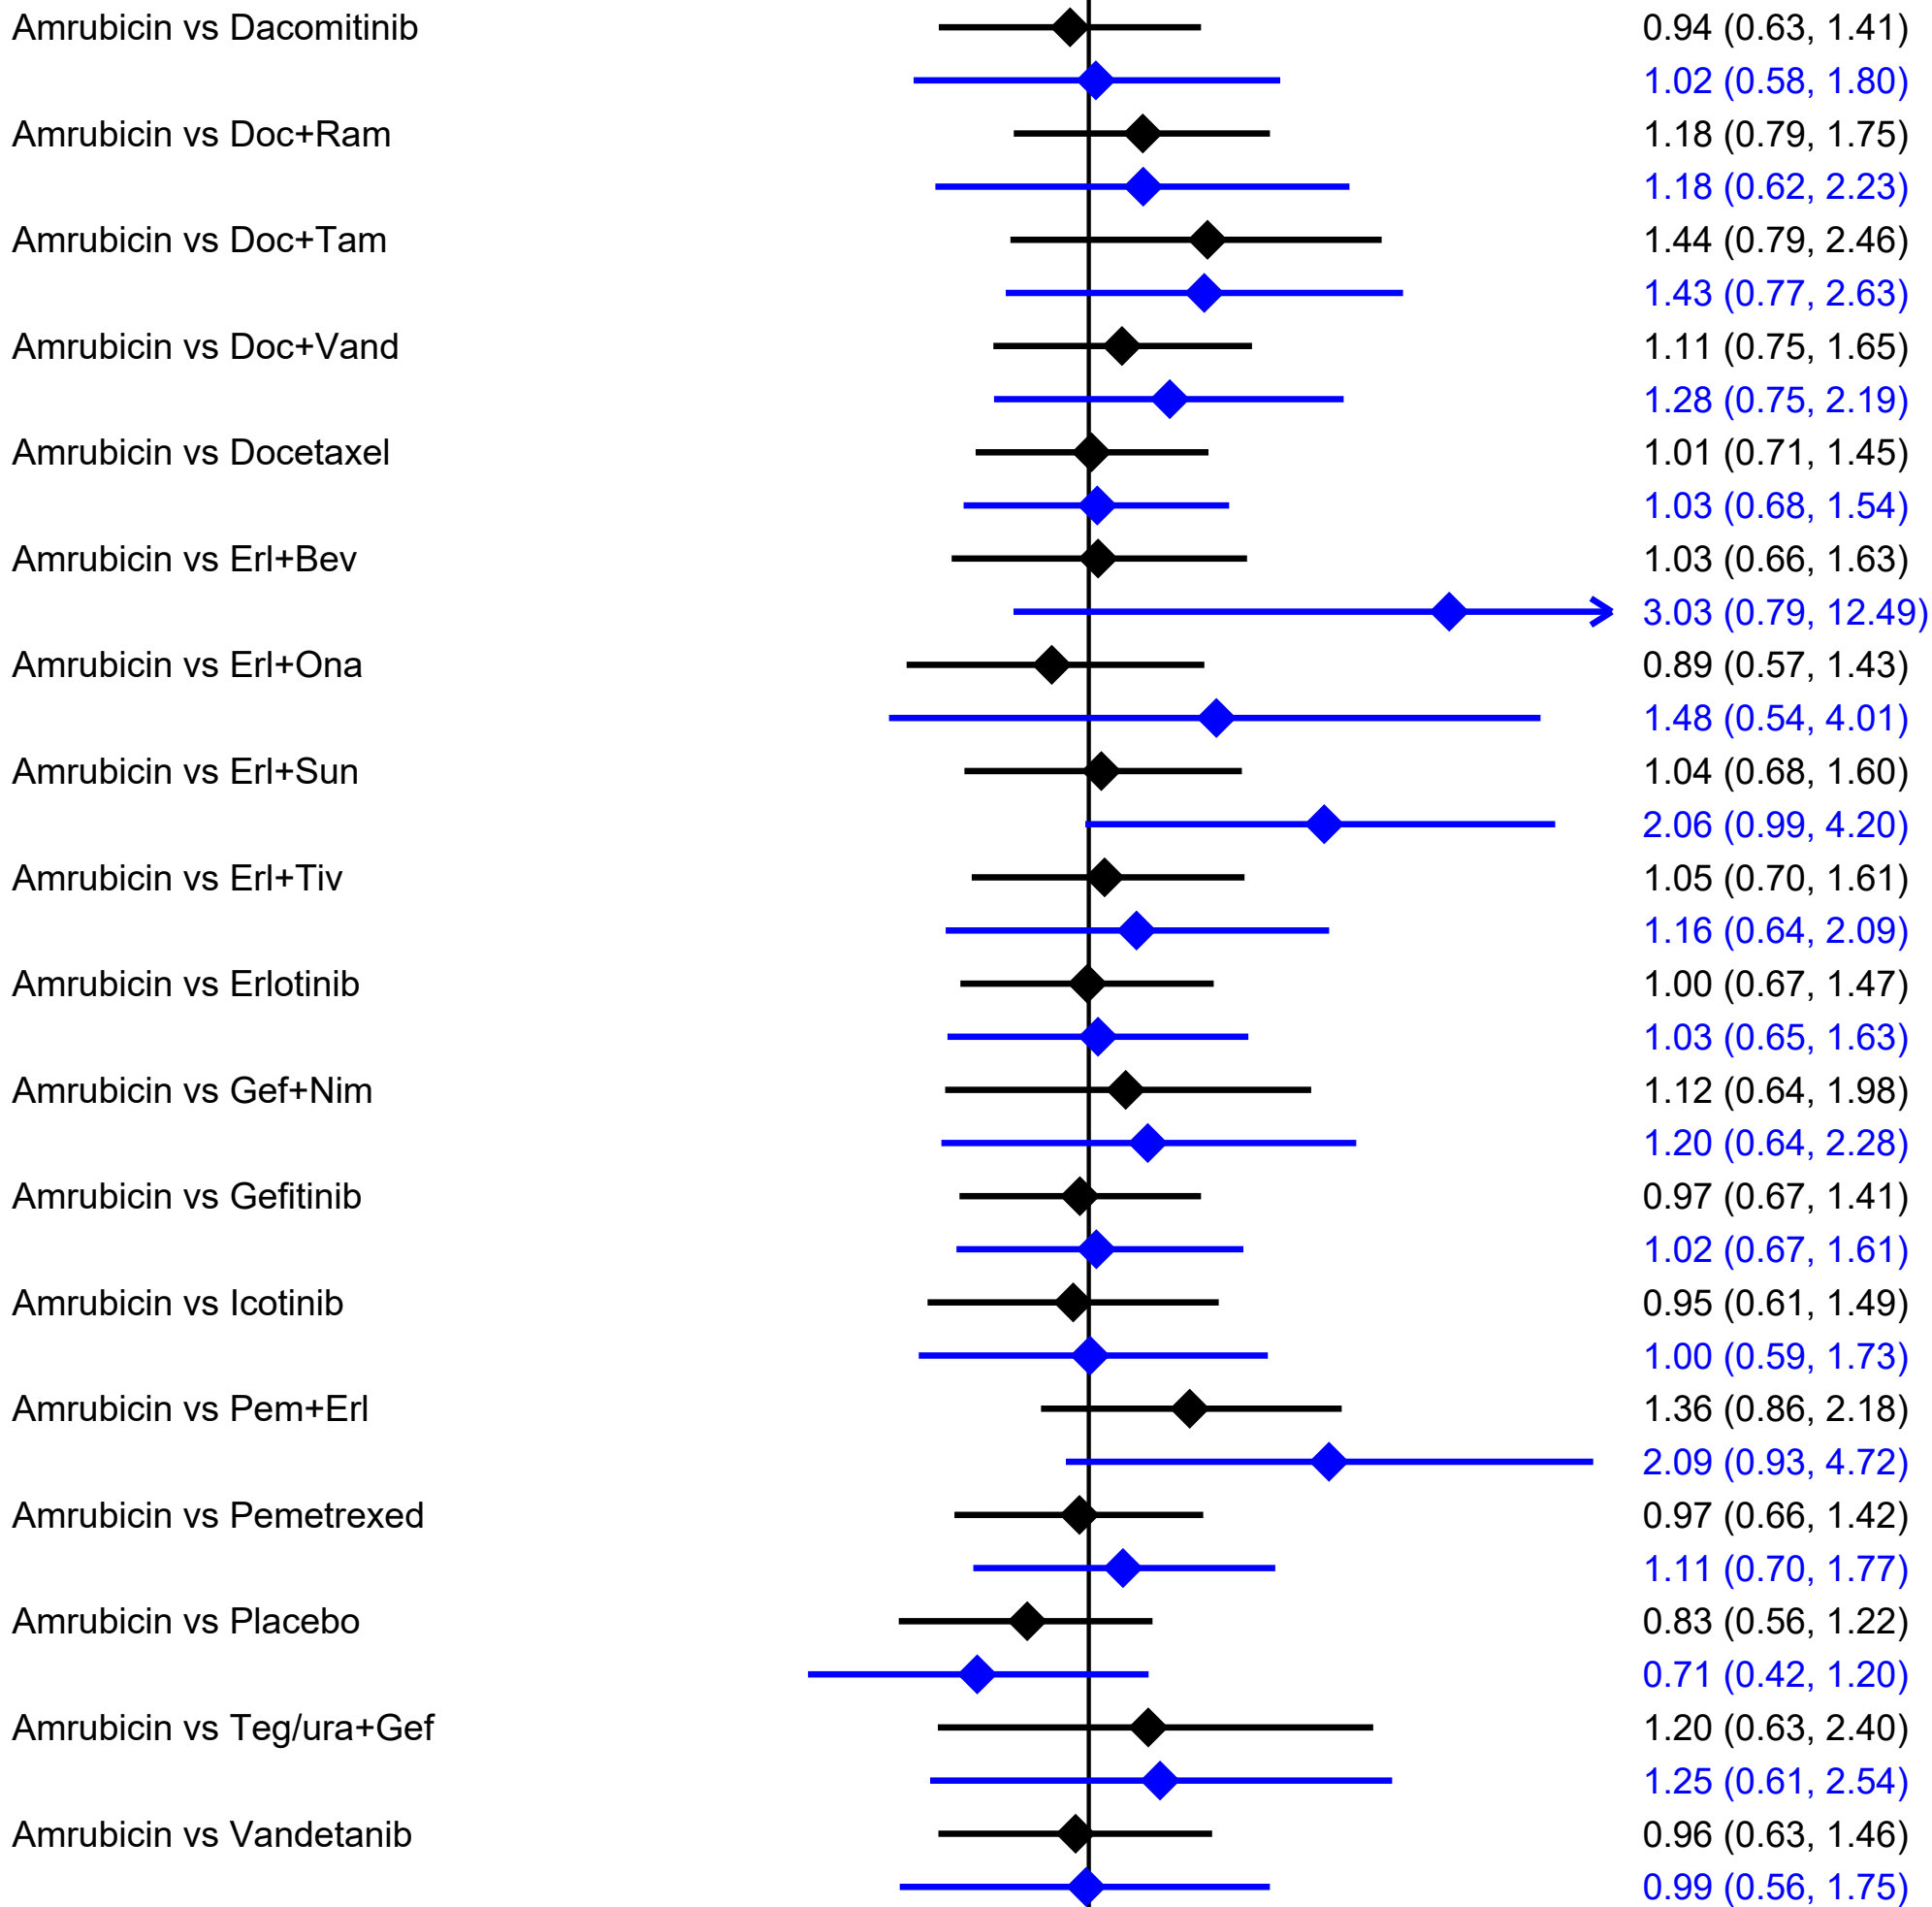

Total population  
 Only Asian population

.2   .3   .5   1   2   5

**Comparison**

**Overall Survival**

**HR (95% CrI)**

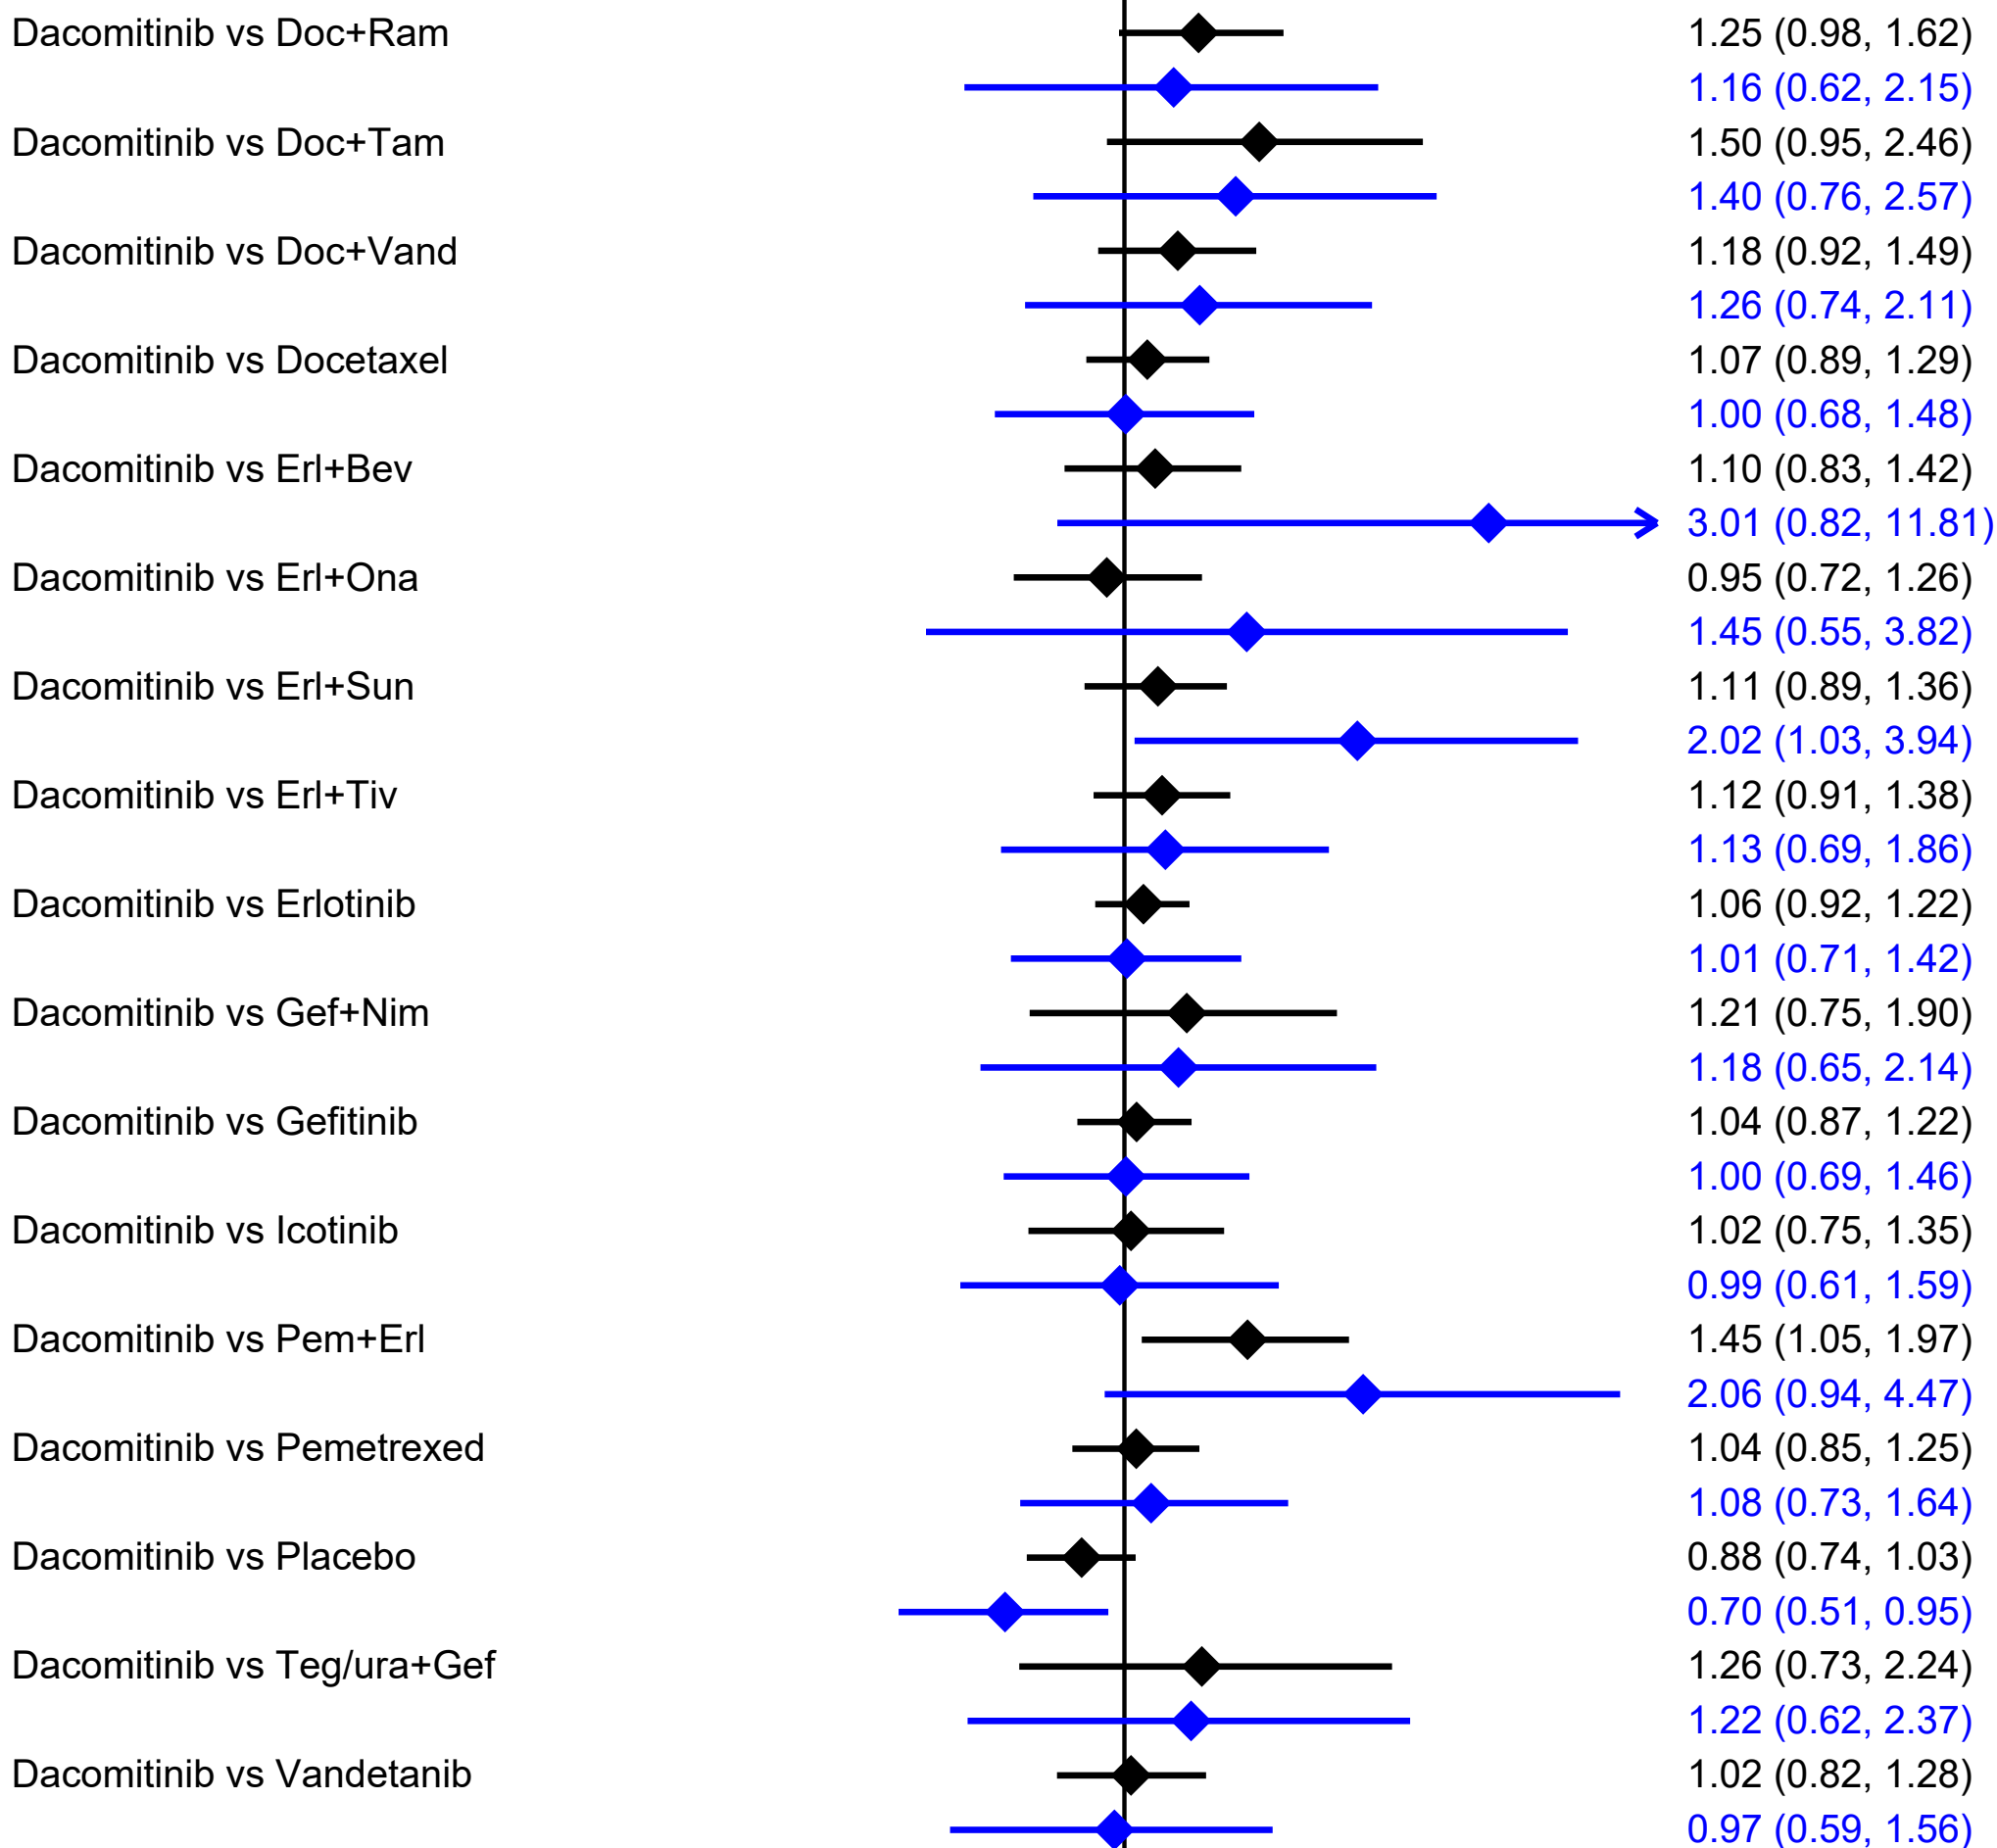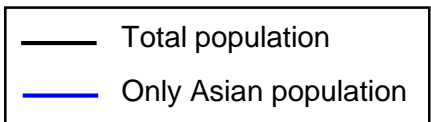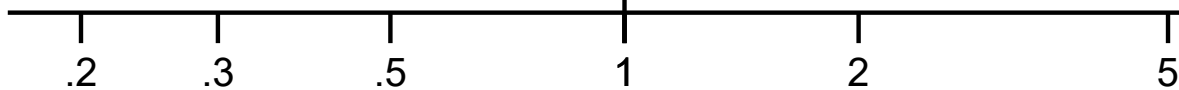

**Comparison**

**Overall Survival**

**HR (95% CrI)**

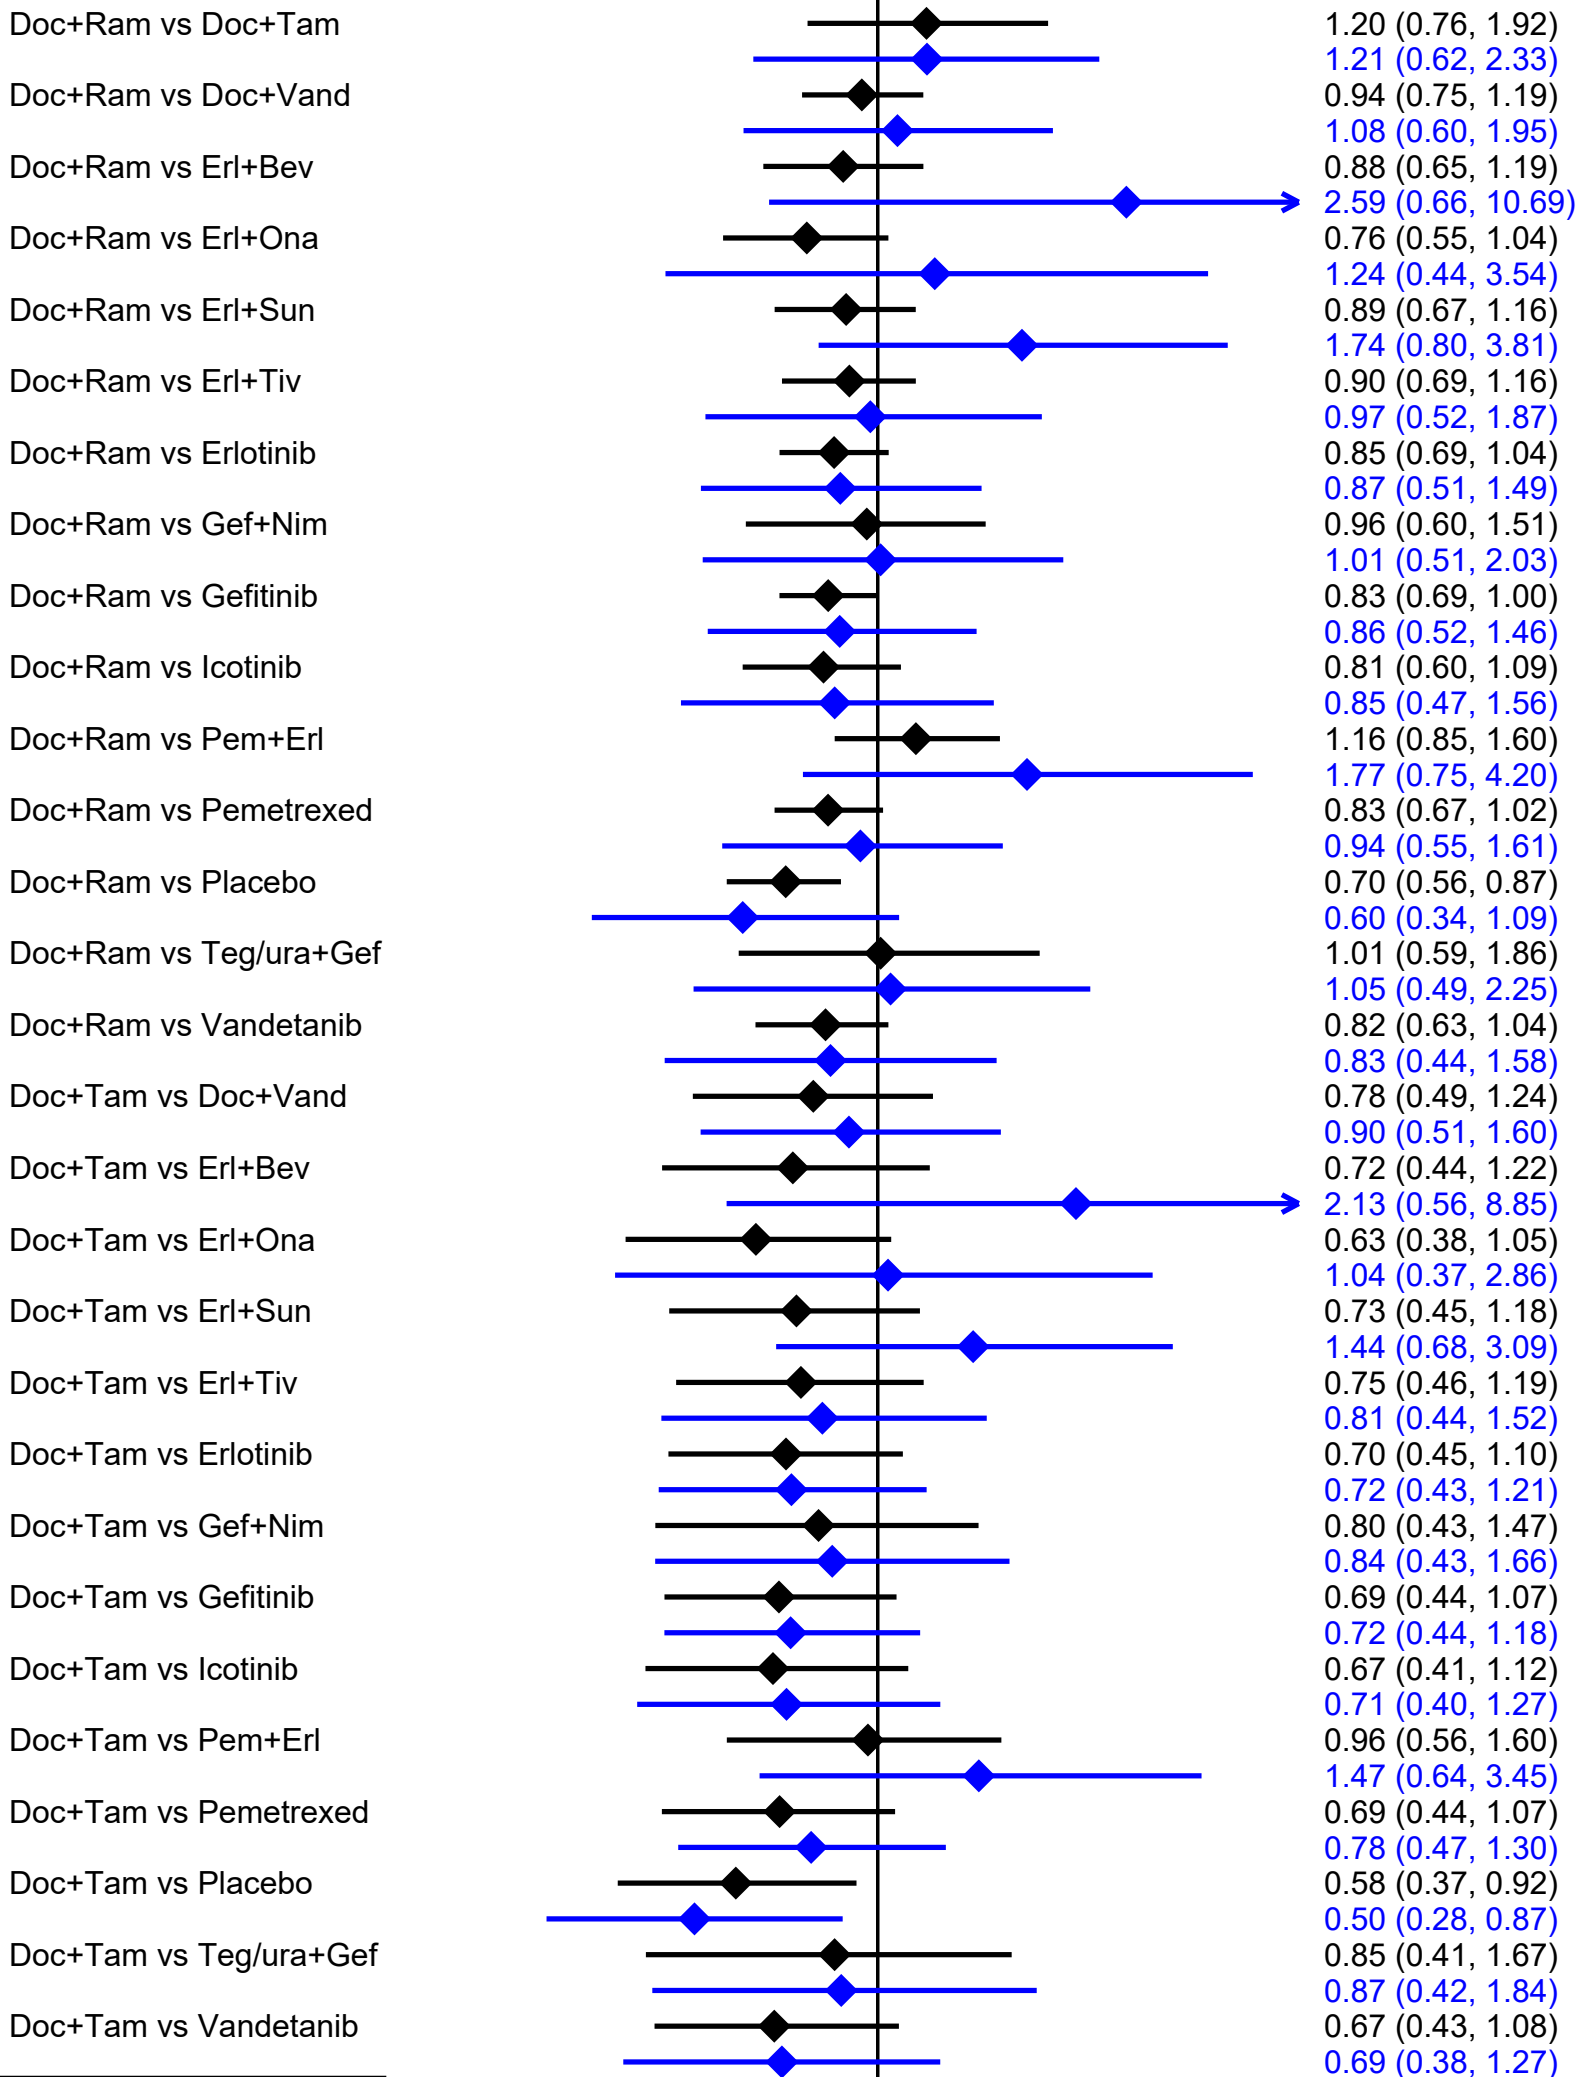

— Total population  
— Only Asian population

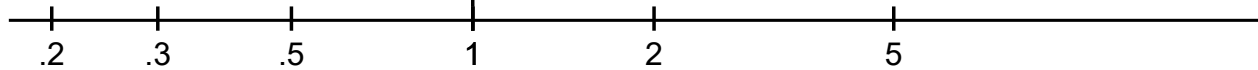



**Comparison**

**Overall Survival**

**HR (95% CrI)**

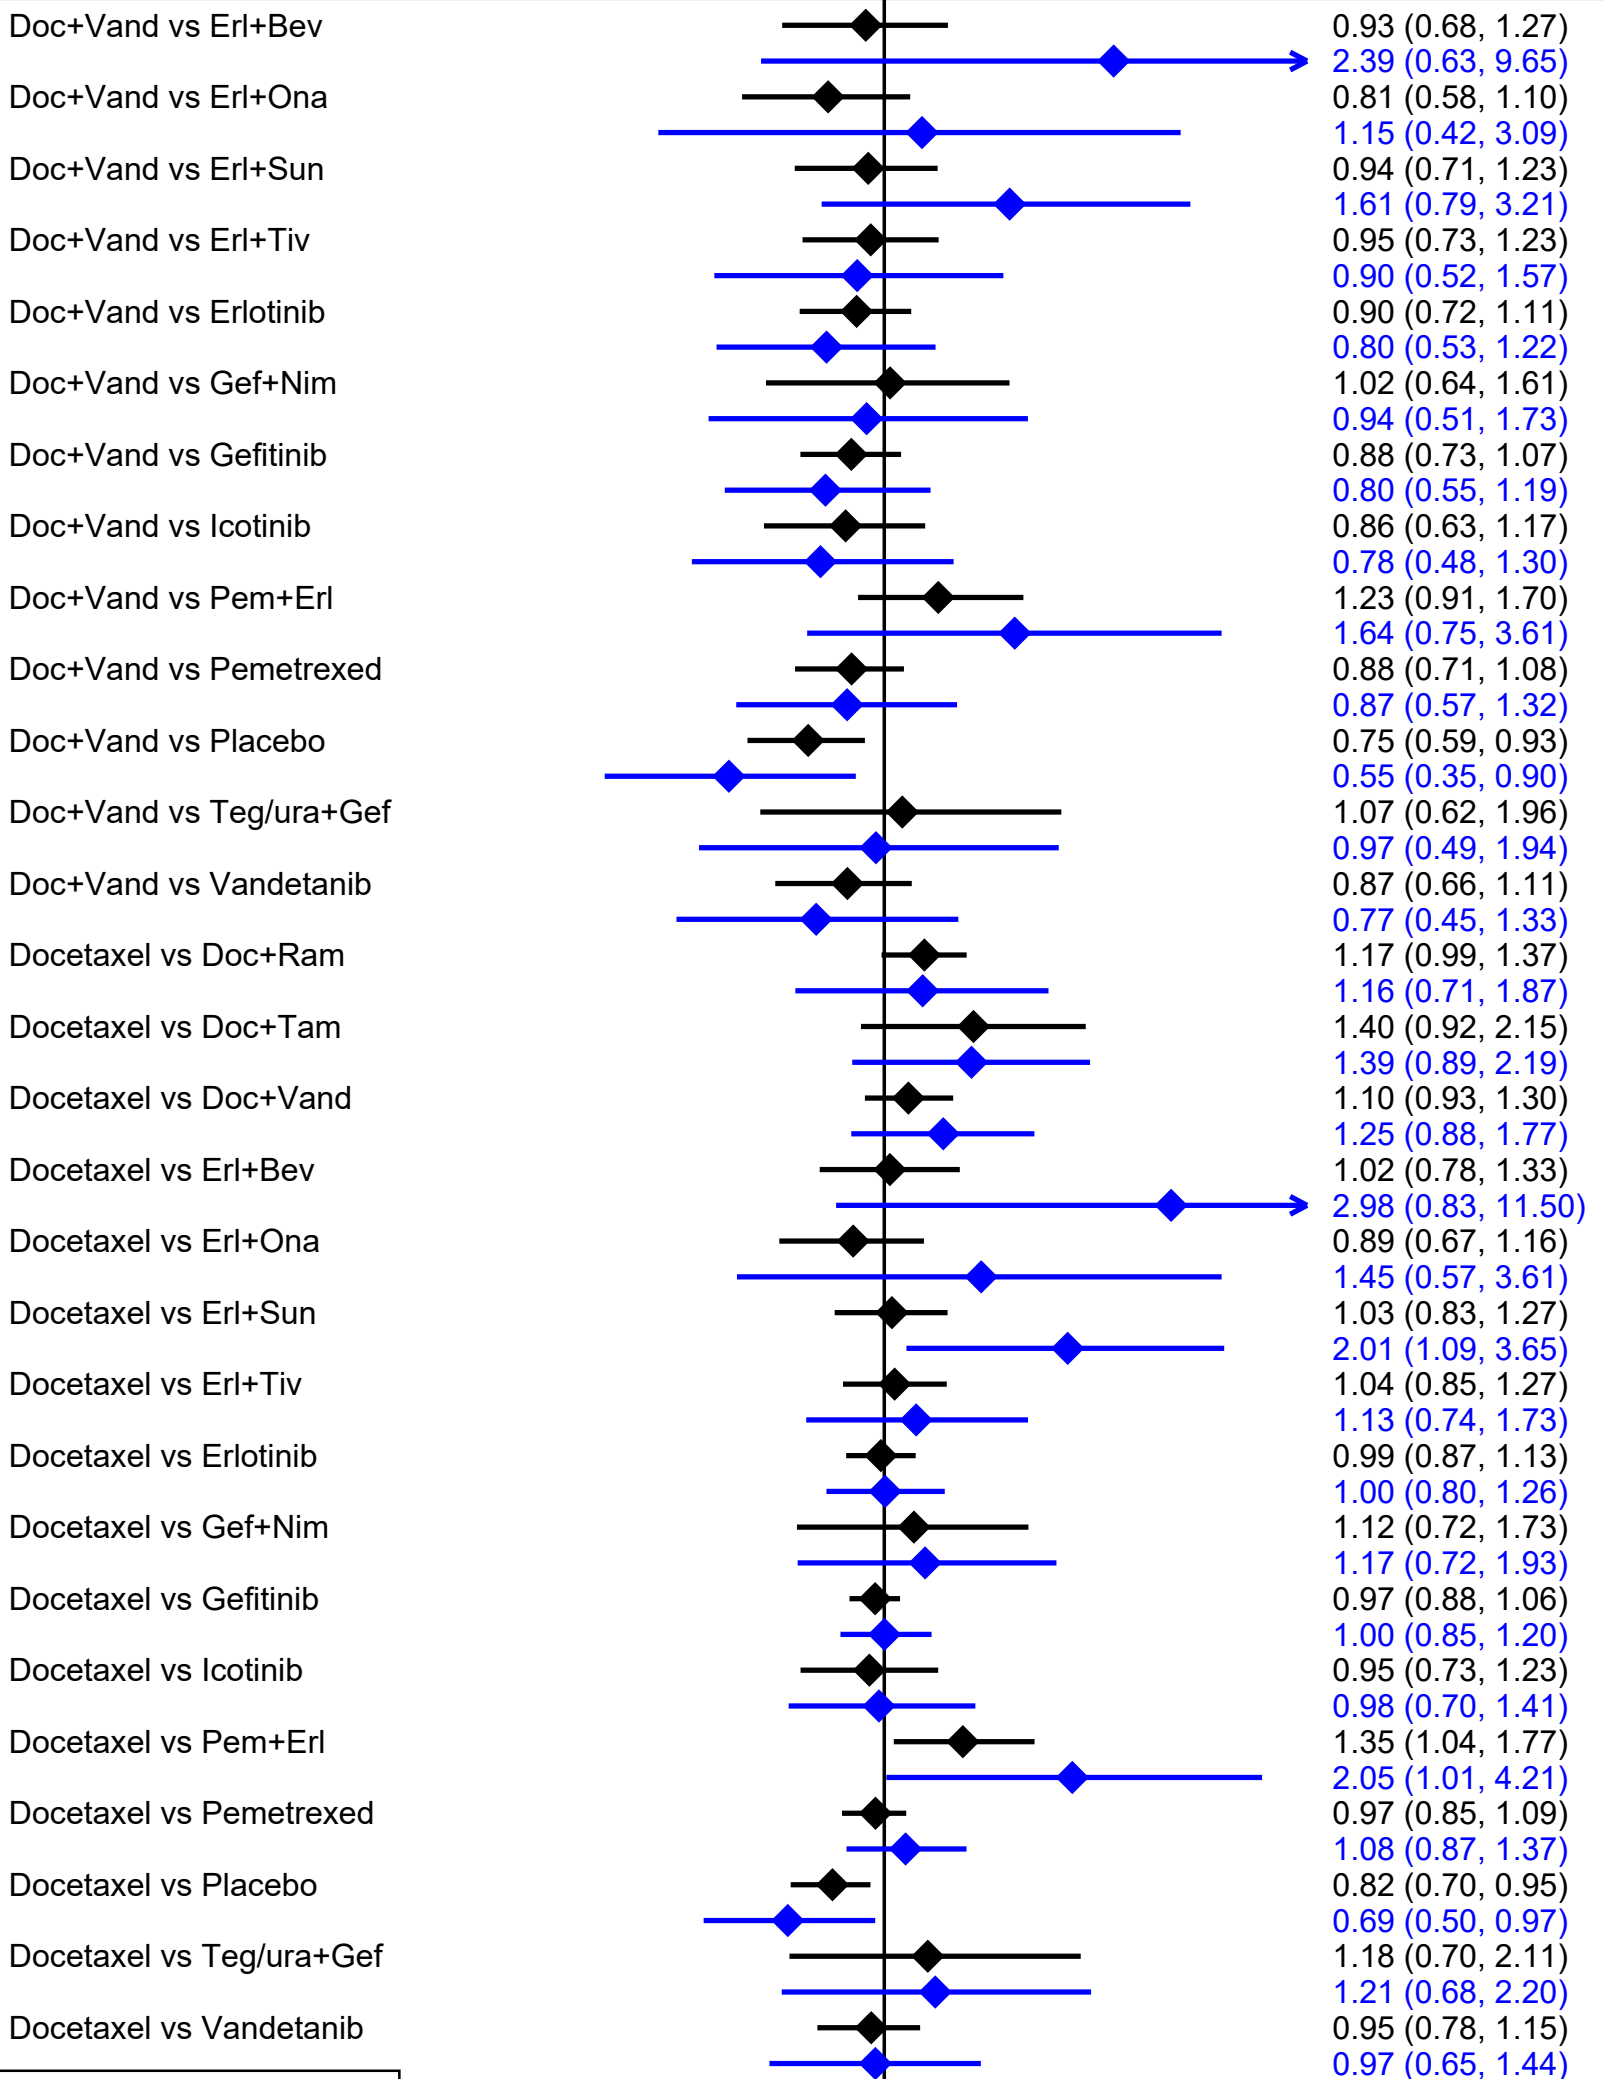

— Total population  
— Only Asian population

.2 .3 .5 1 2 5

Comparison

Overall Survival

HR (95% CrI)

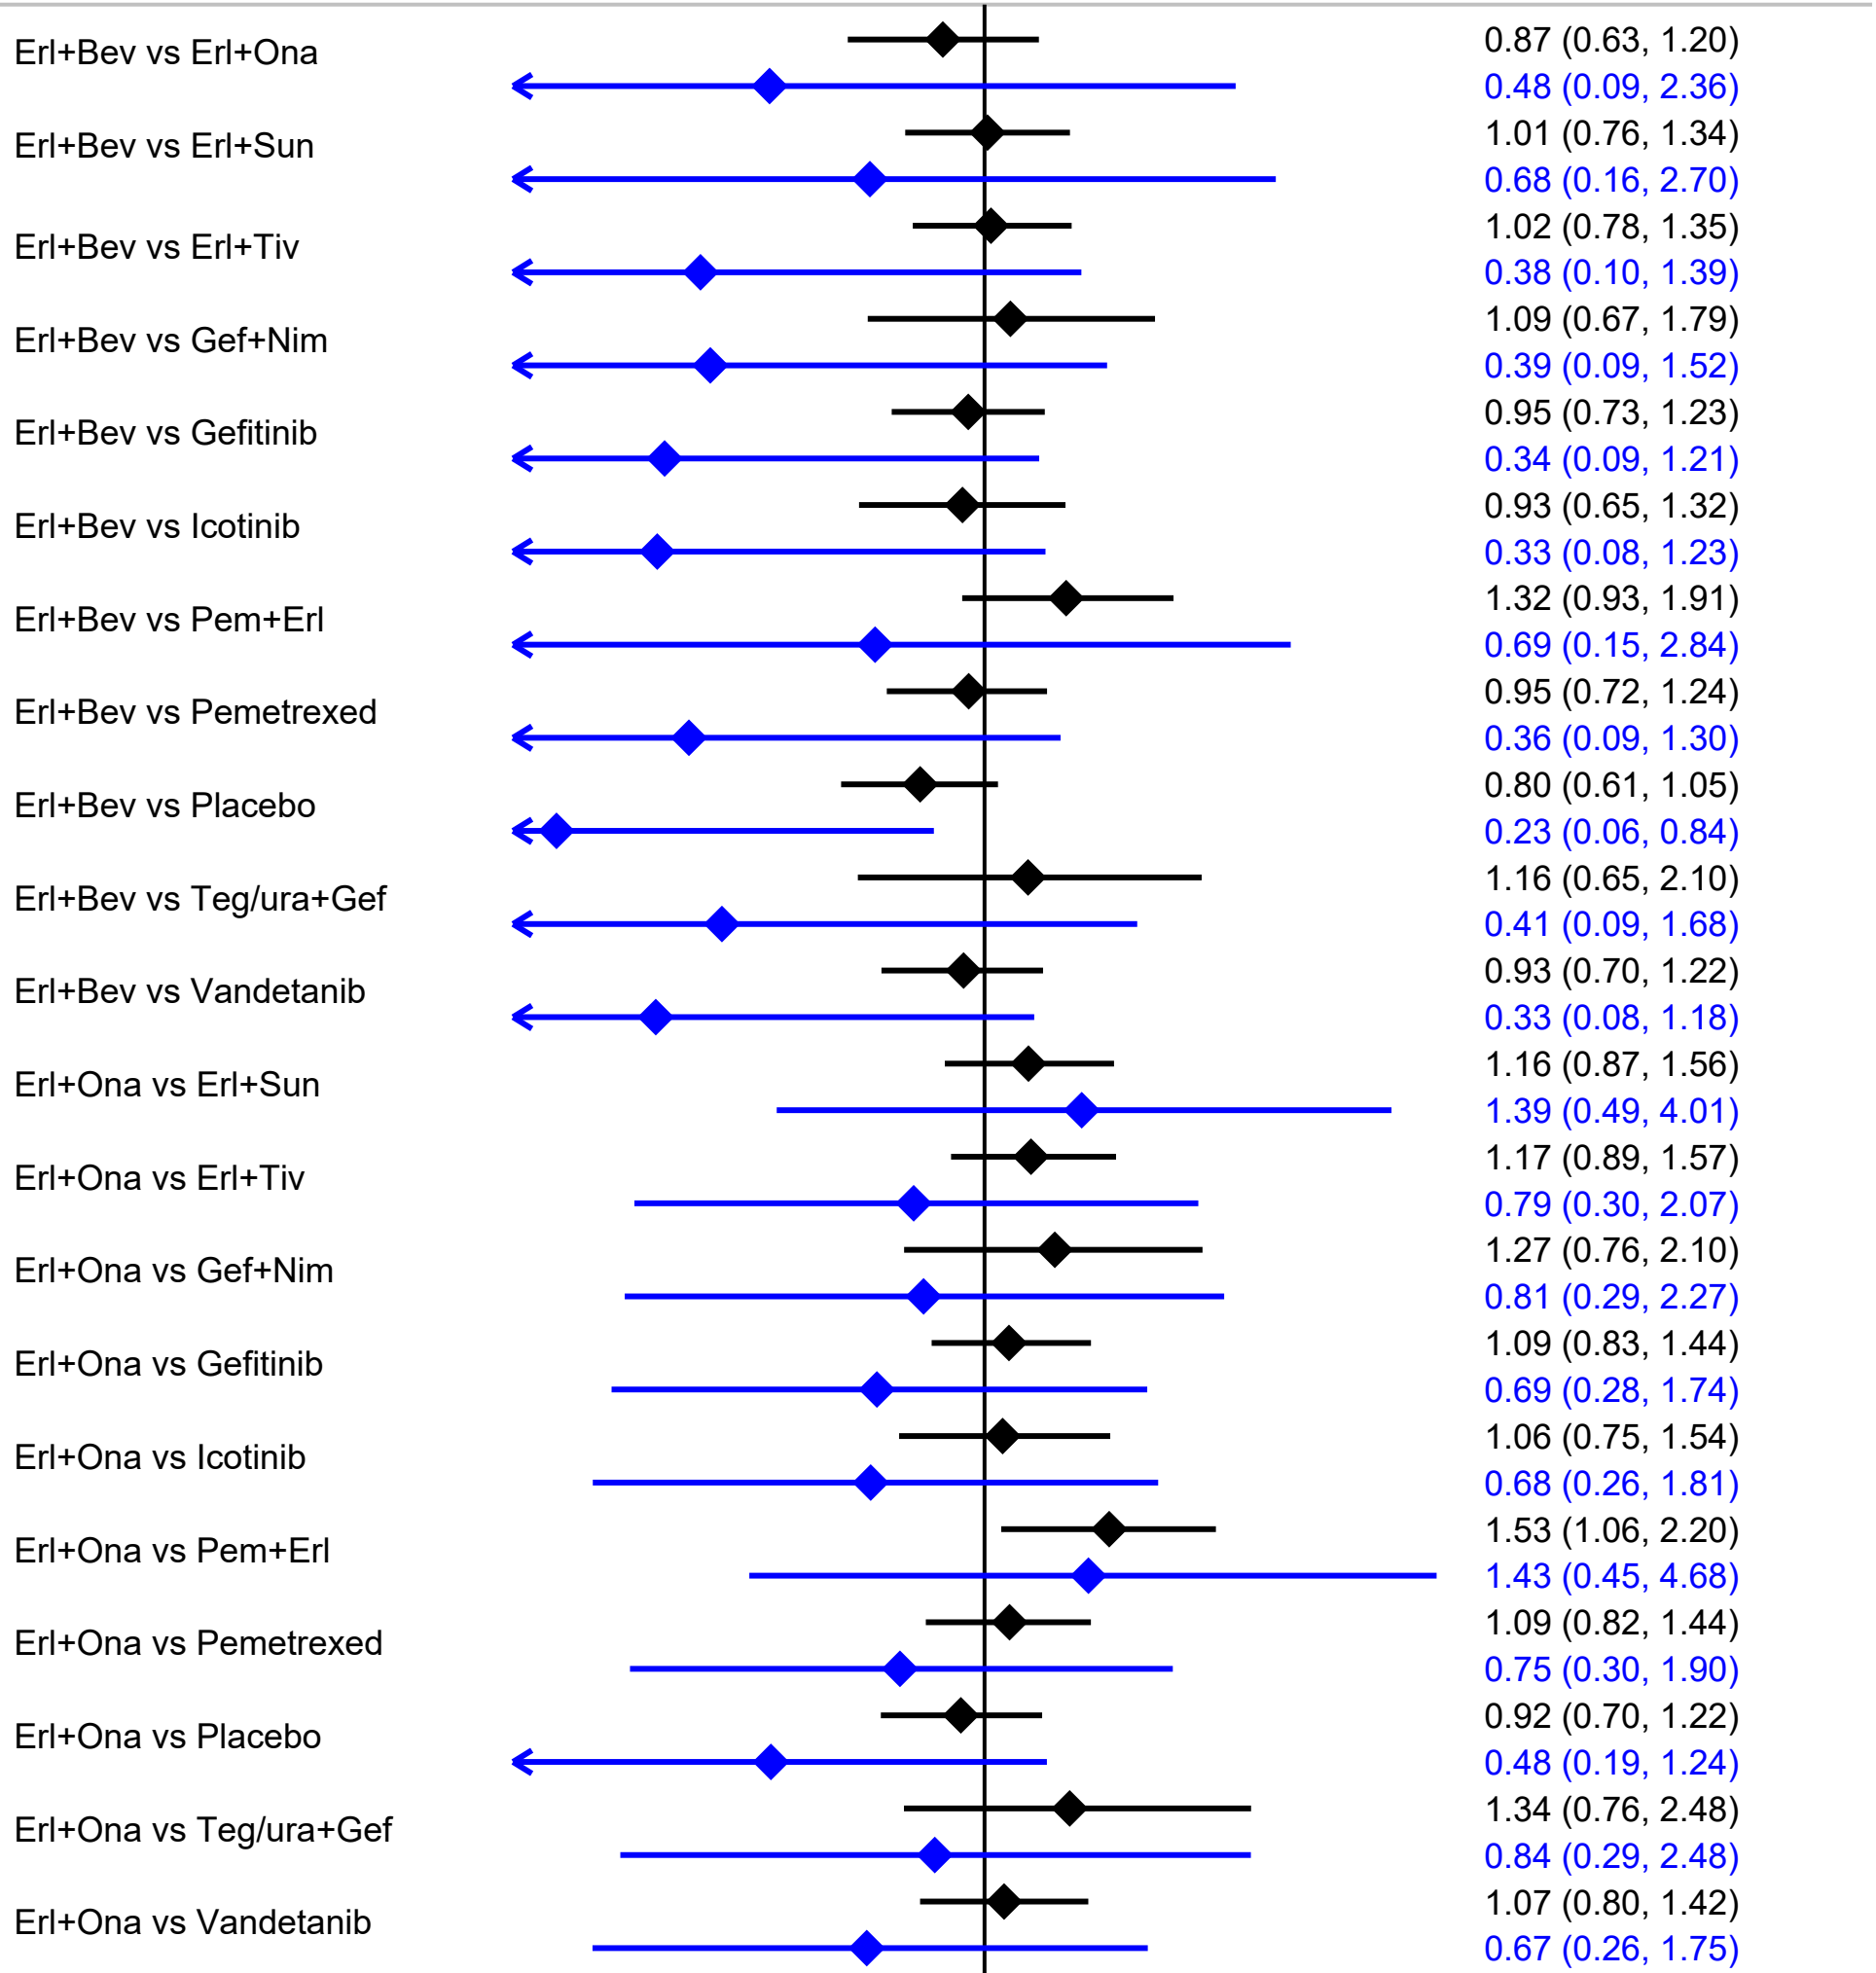

— Total population  
— Only Asian population

.2 .3 .5 1 2 5

Comparison

# Overall Survival

HR (95% CrI)

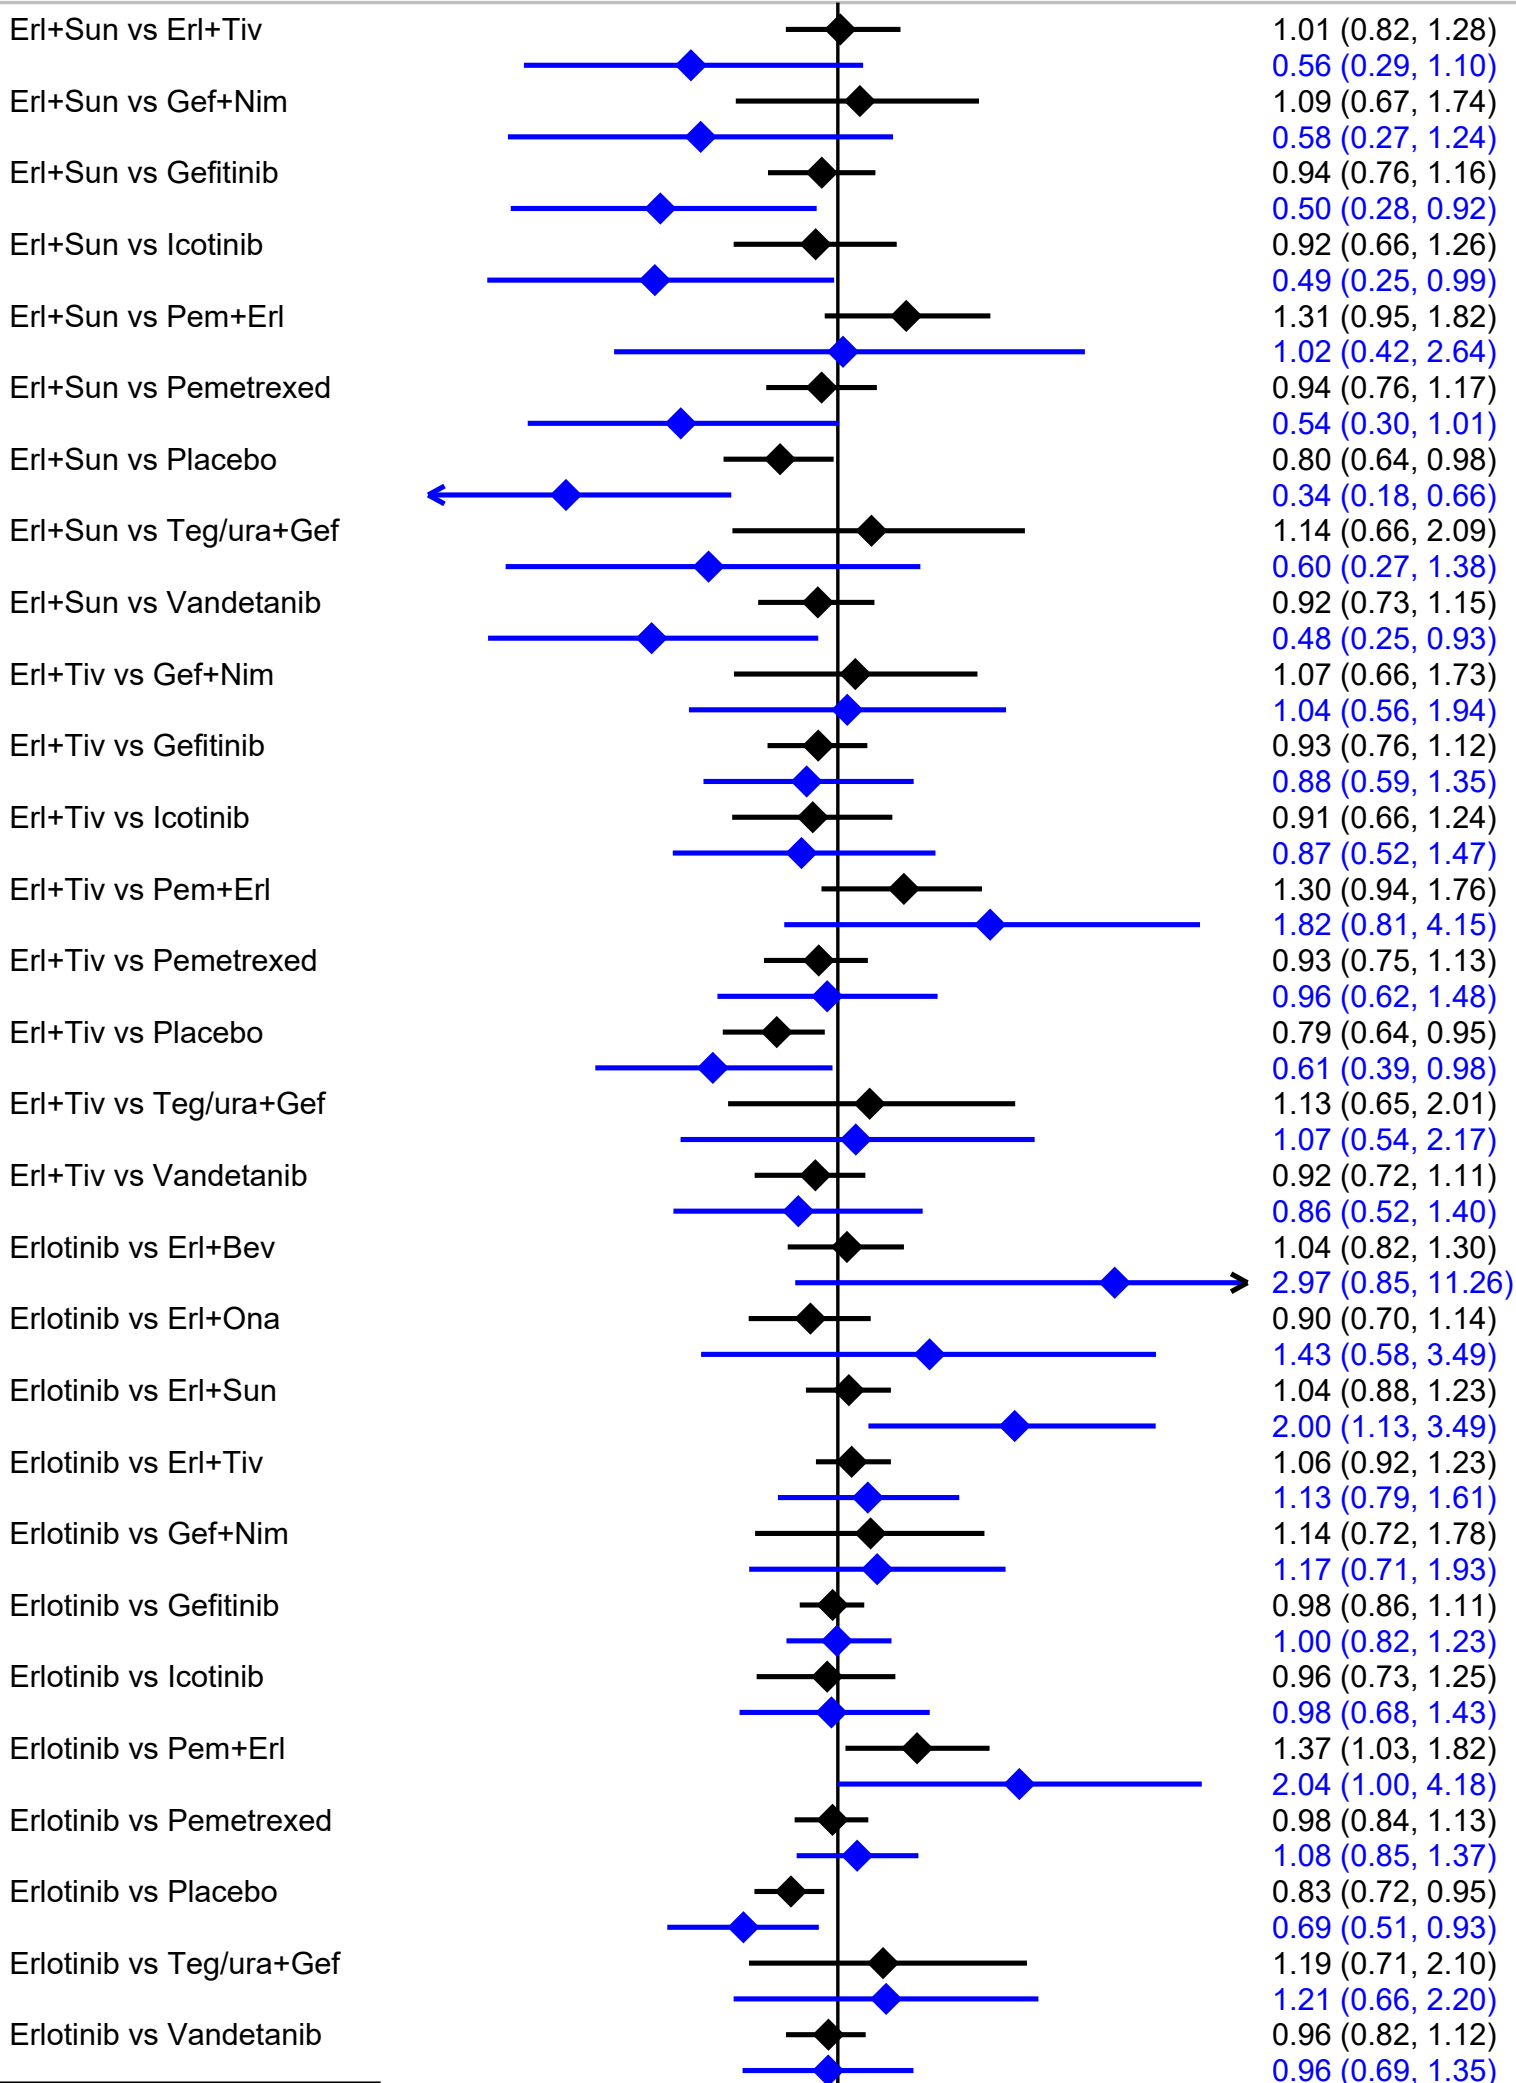

— Total population  
— Only Asian population

.2 .3 .5 1 2 5

**Comparison**

**Overall Survival**

**HR (95% CrI)**

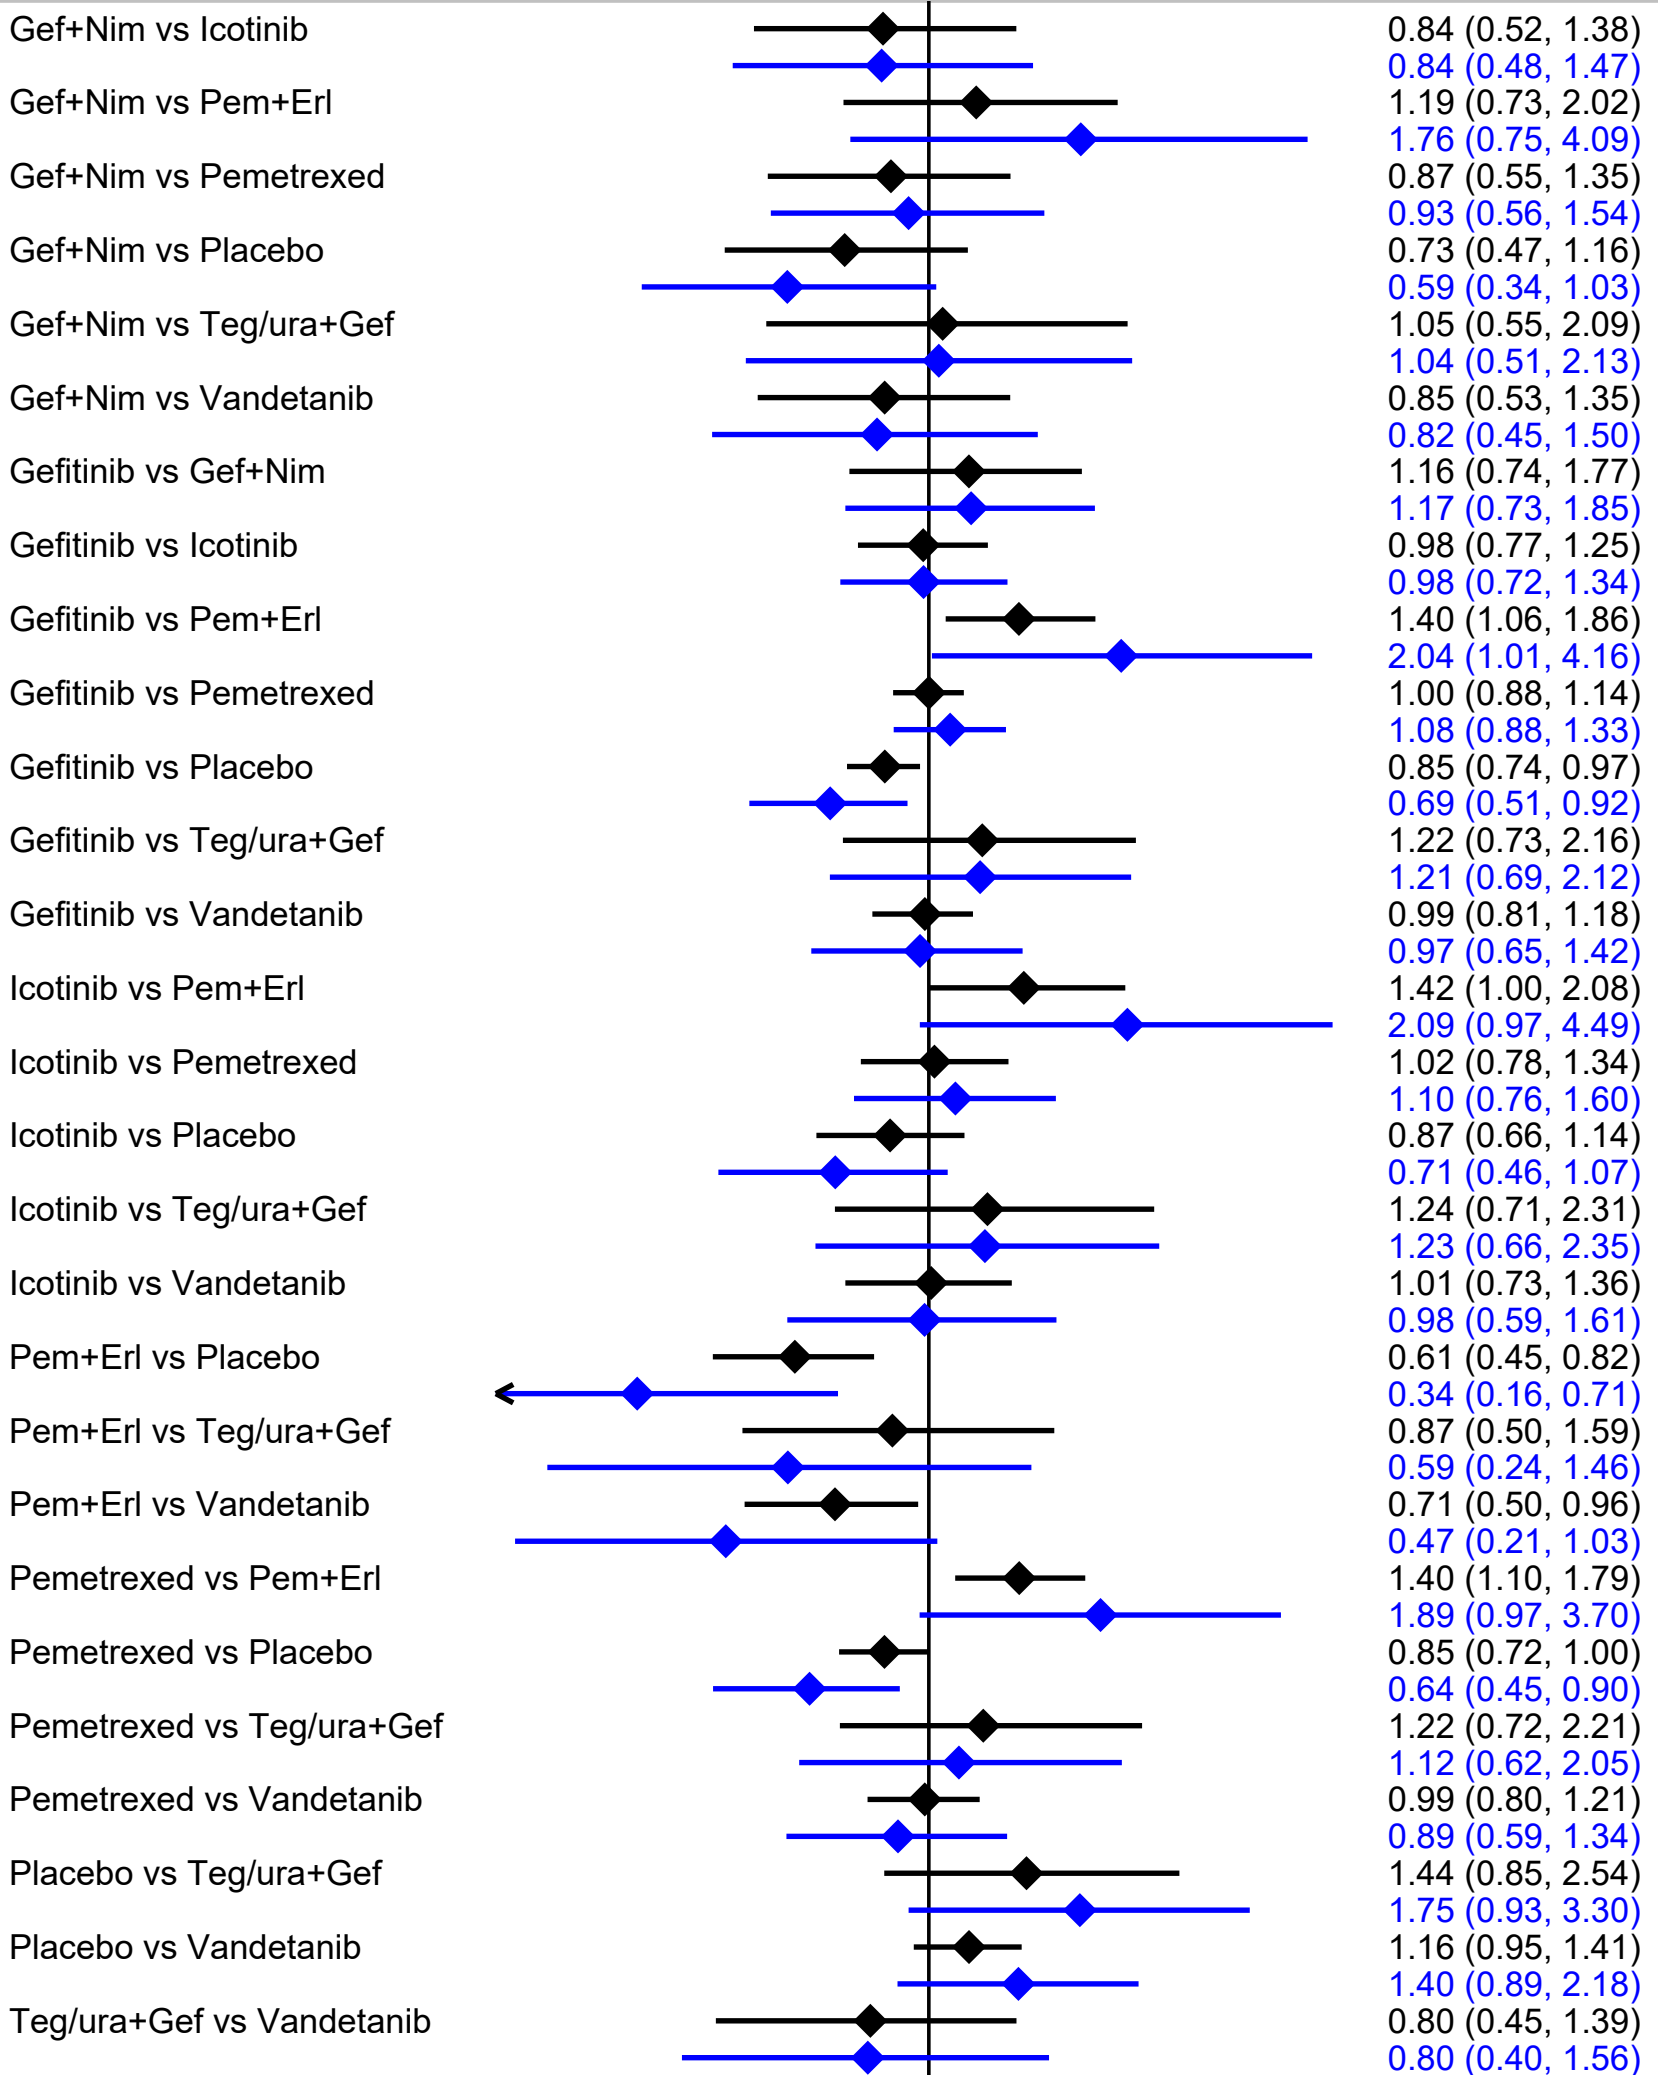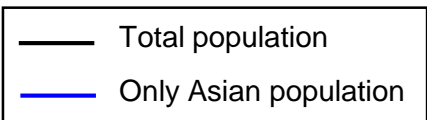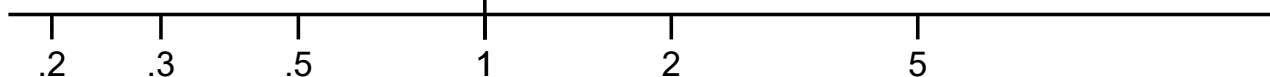

**Comparison**

**Progression Free Survival**

**HR (95% CrI)**

*Favors first treatment* ← *Favors second treatment* →

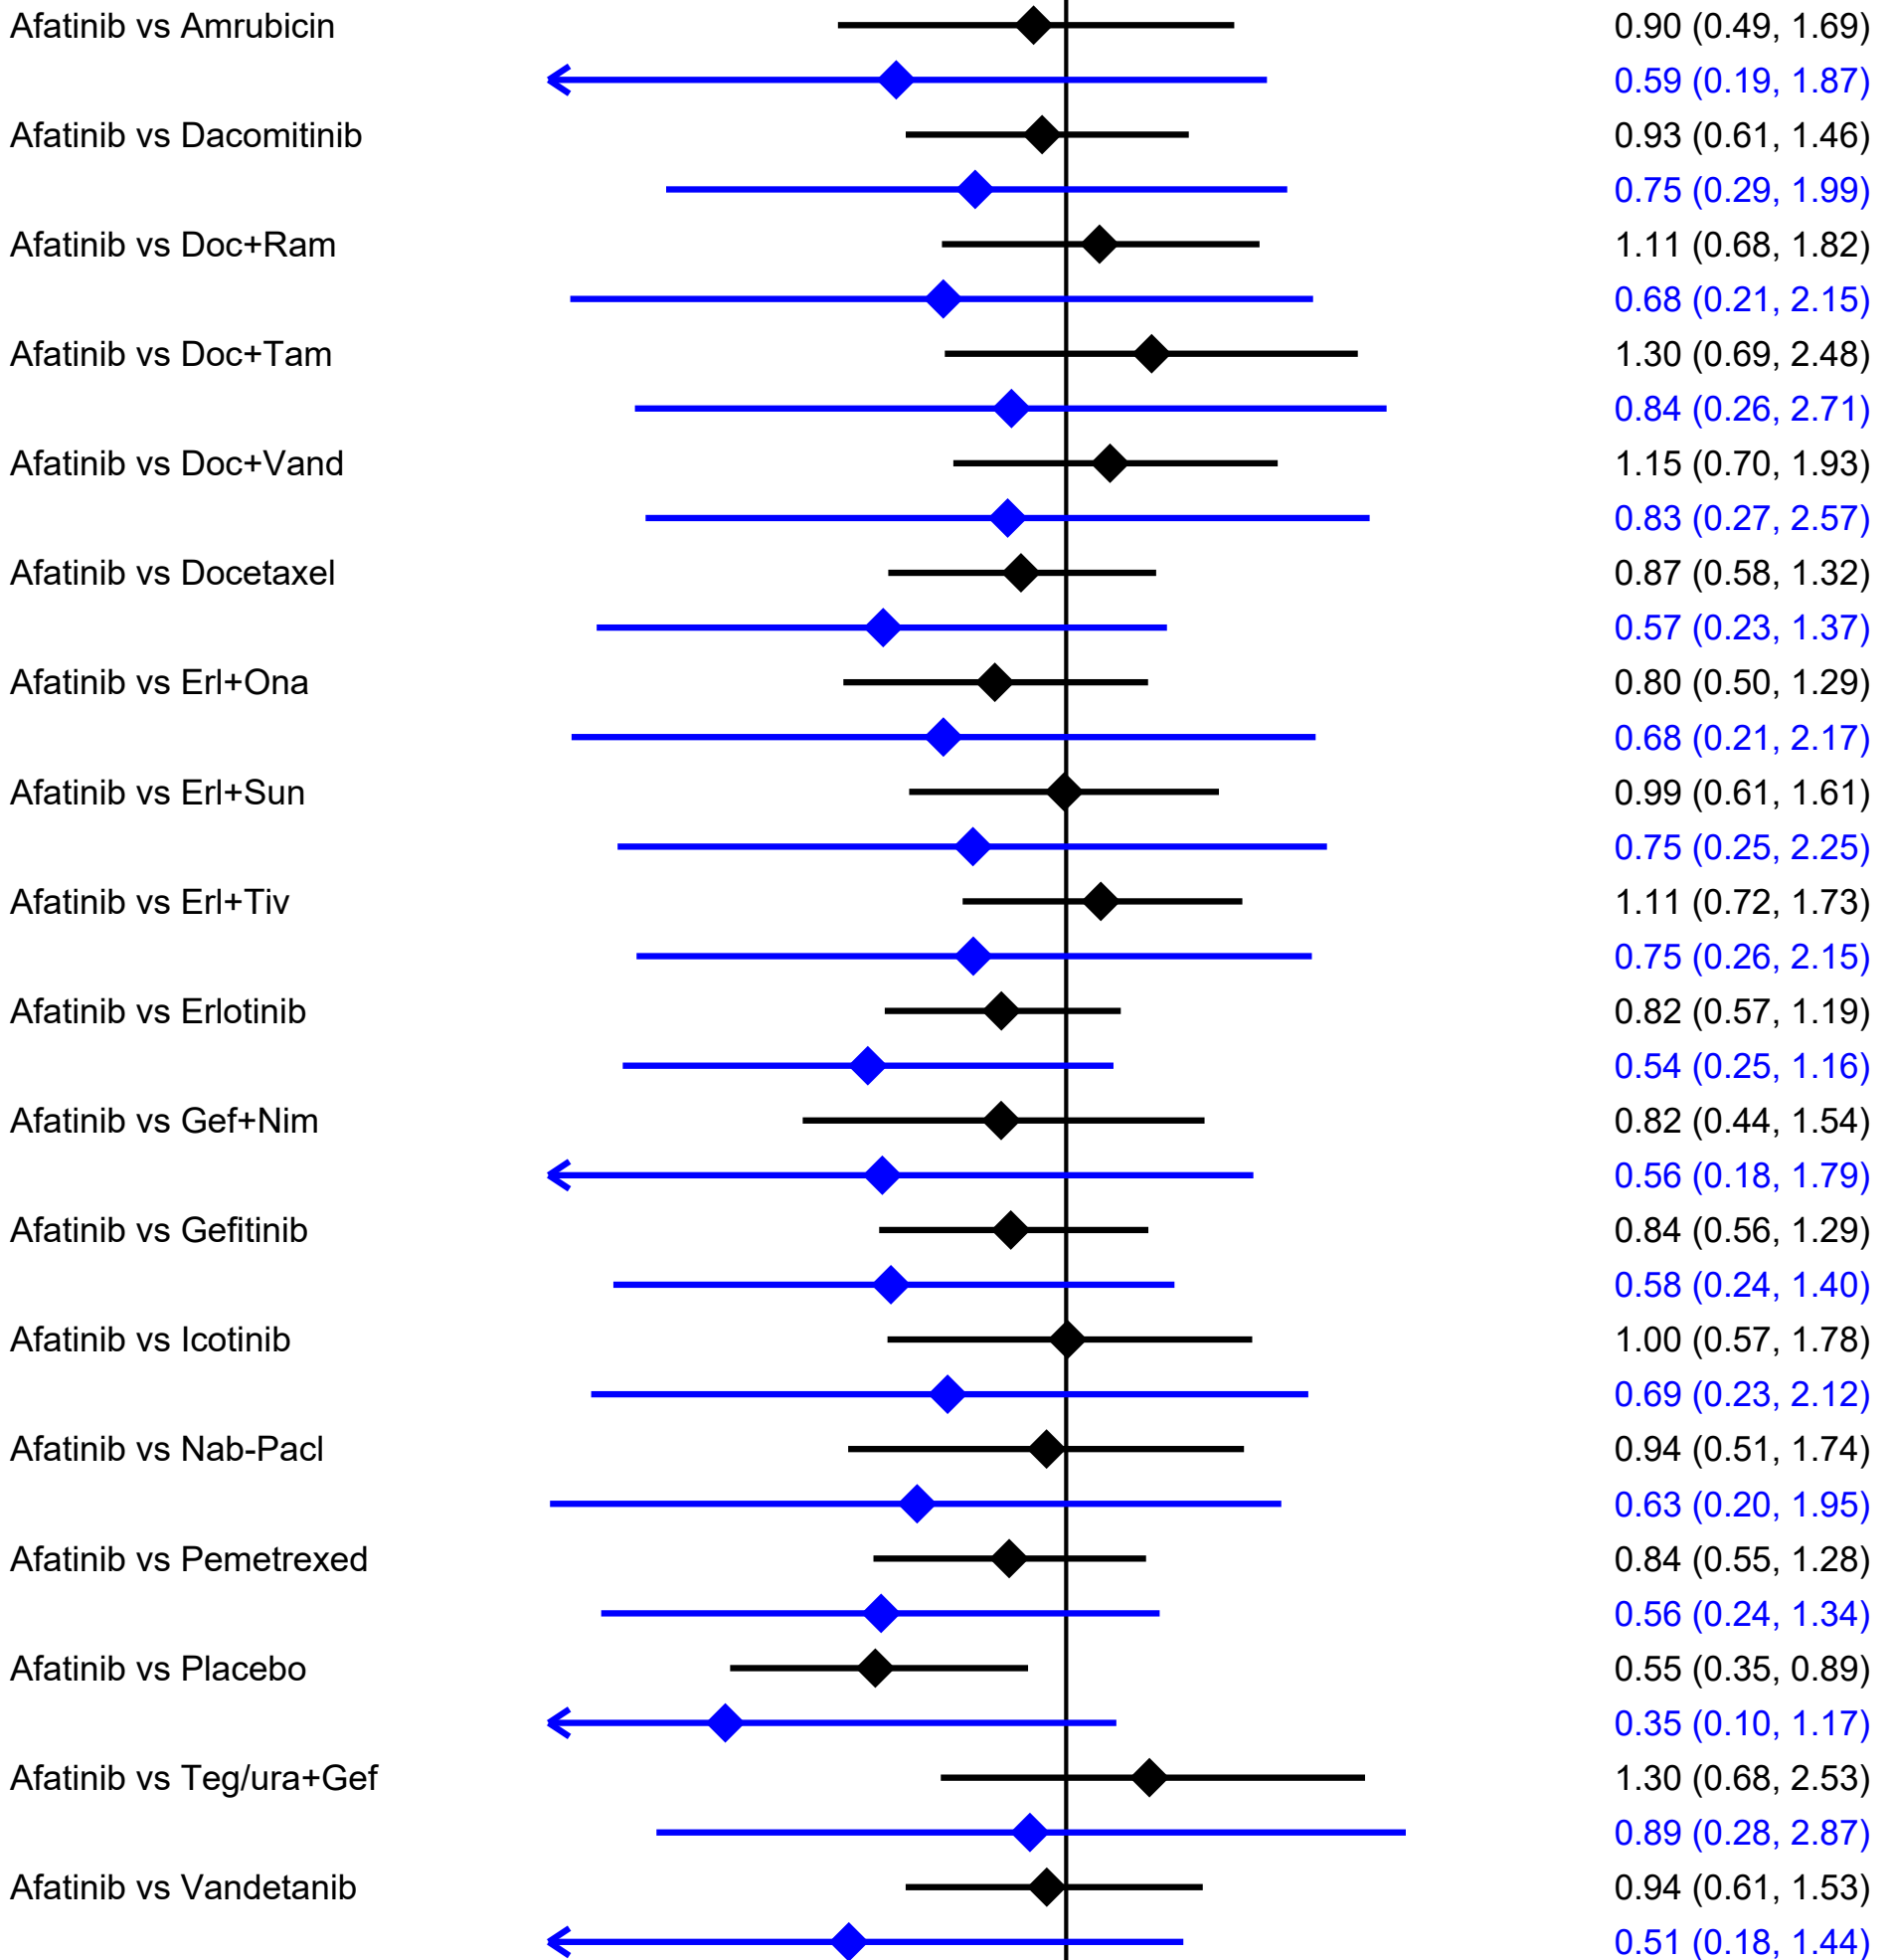

— Total population  
— Only Asian population

.2 .3 .5 1 2 5

**Comparison**

**Progression Free Survival**

**HR (95% CrI)**

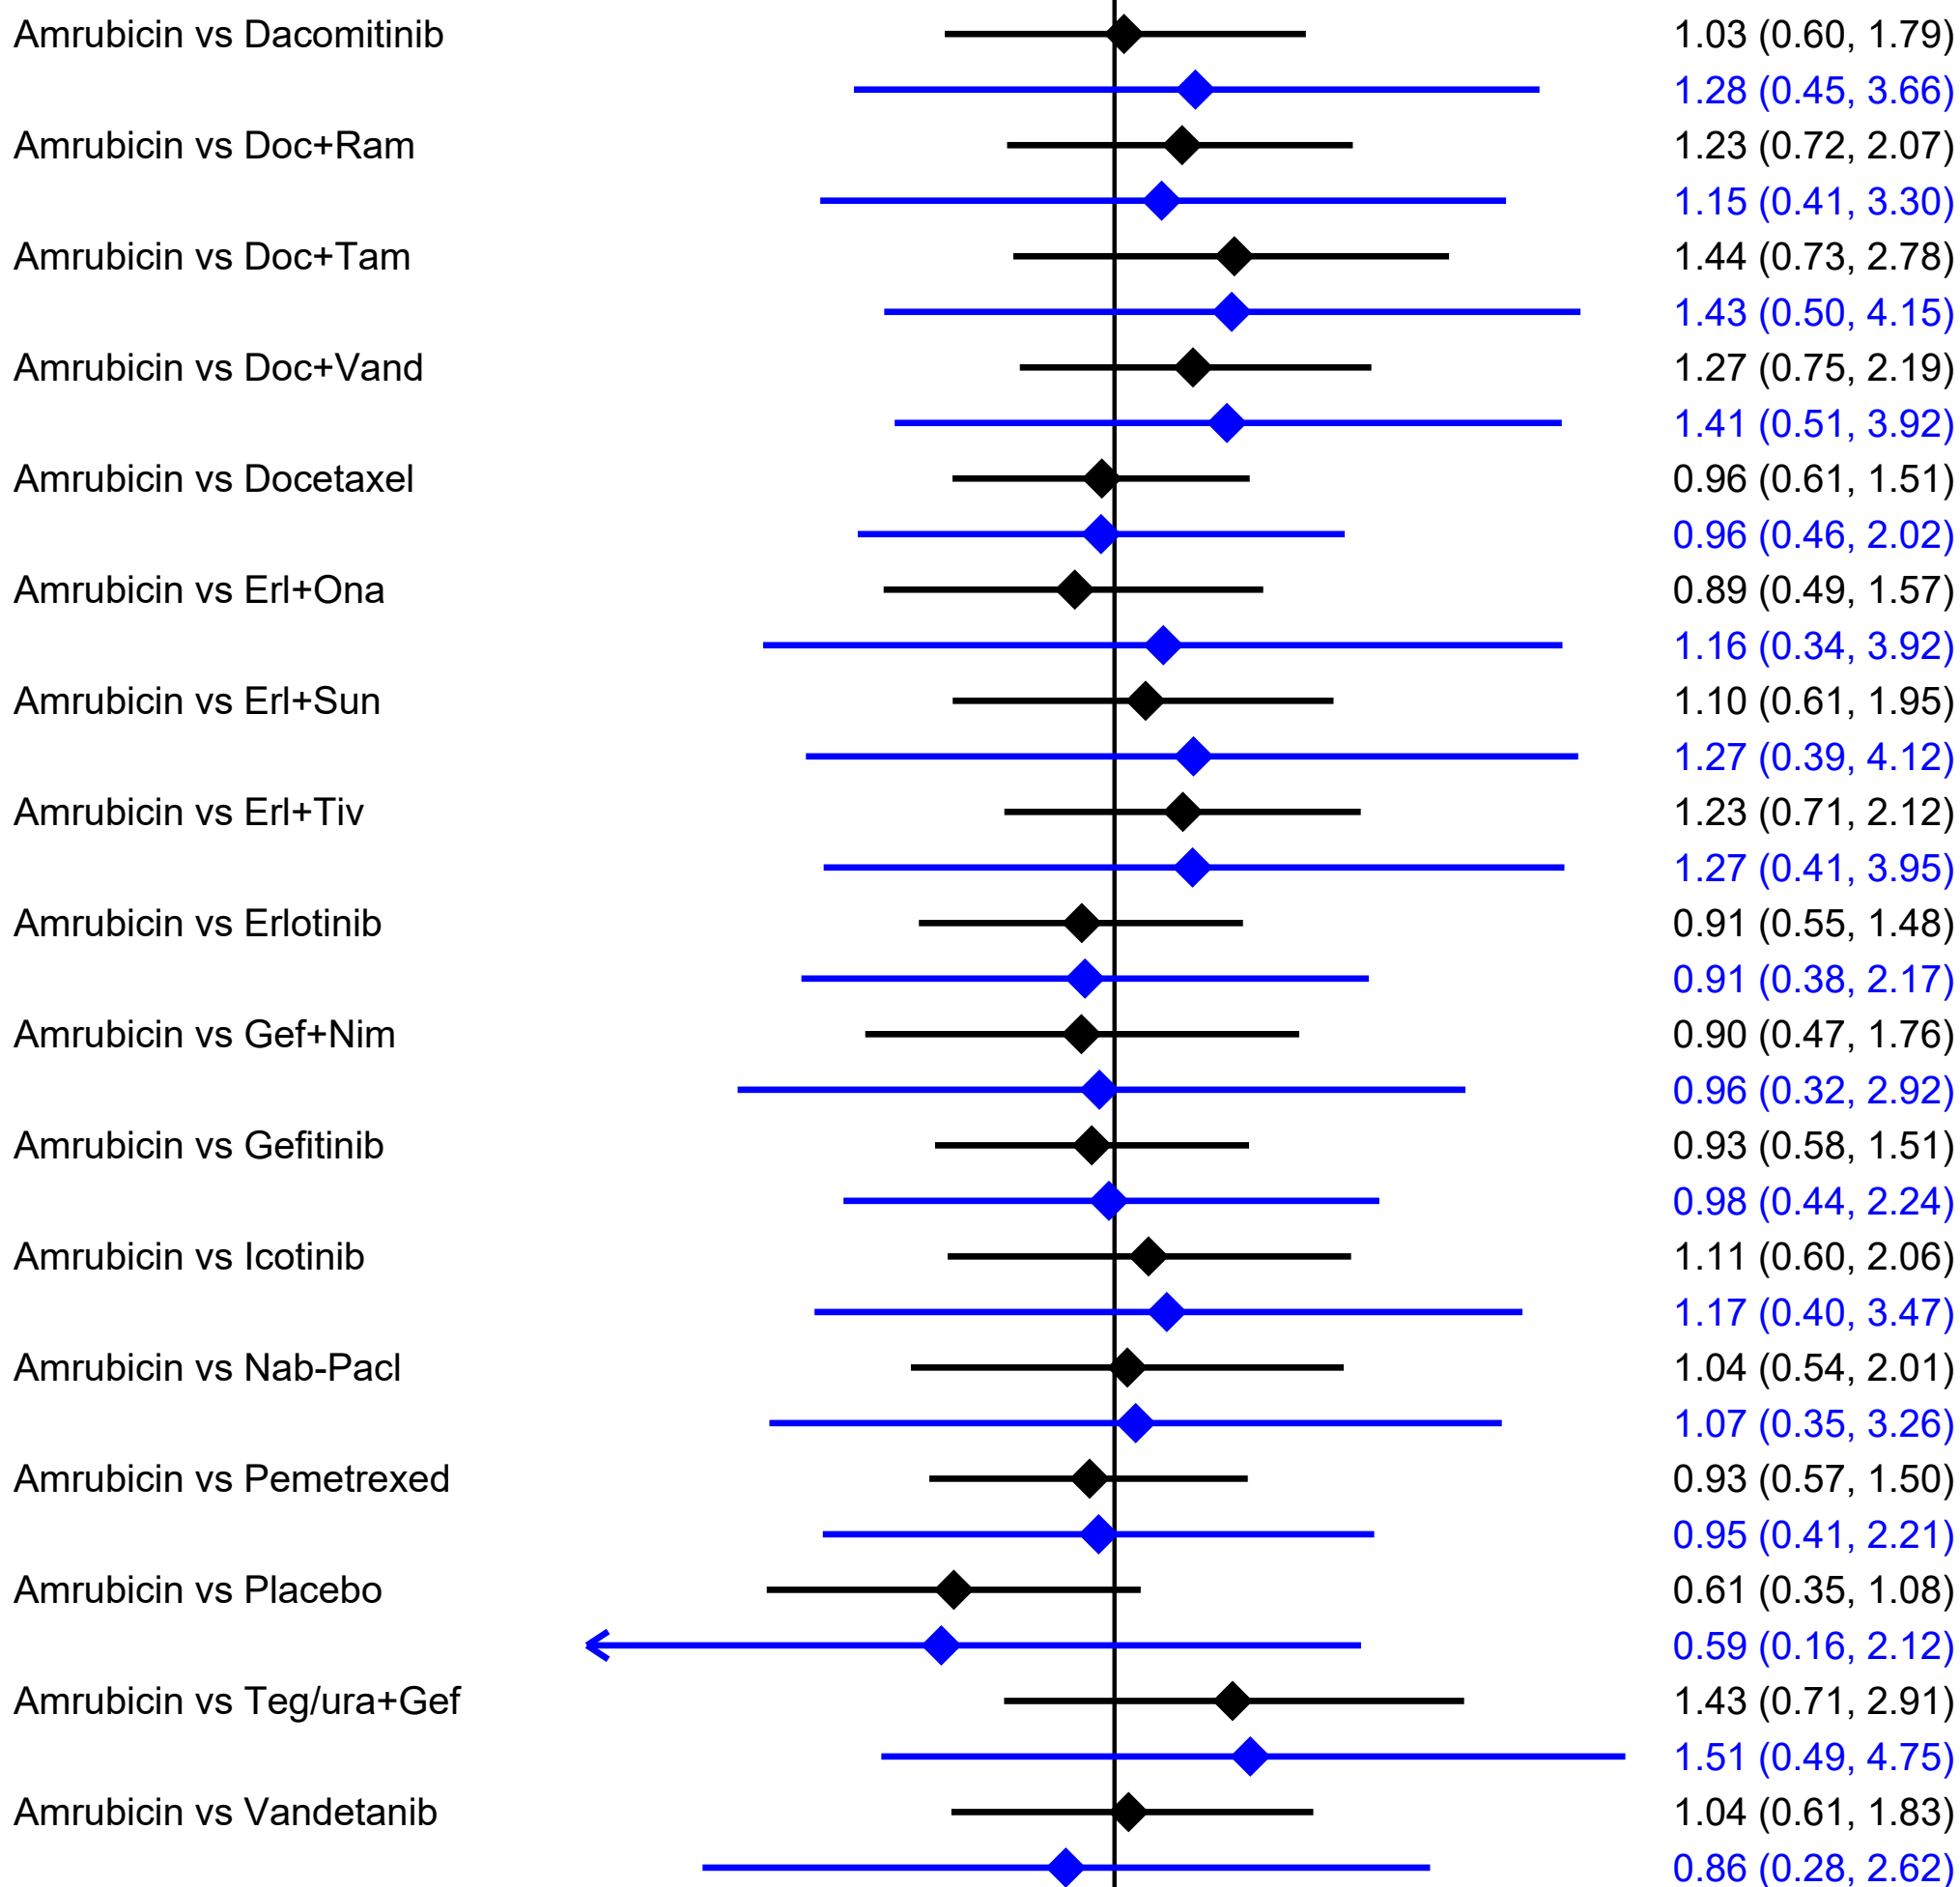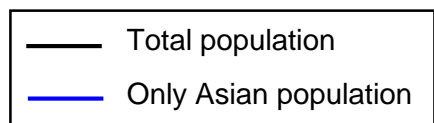

.2 .3 .5 1 2 5

**Comparison**

**Progression Free Survival**

**HR (95% CrI)**

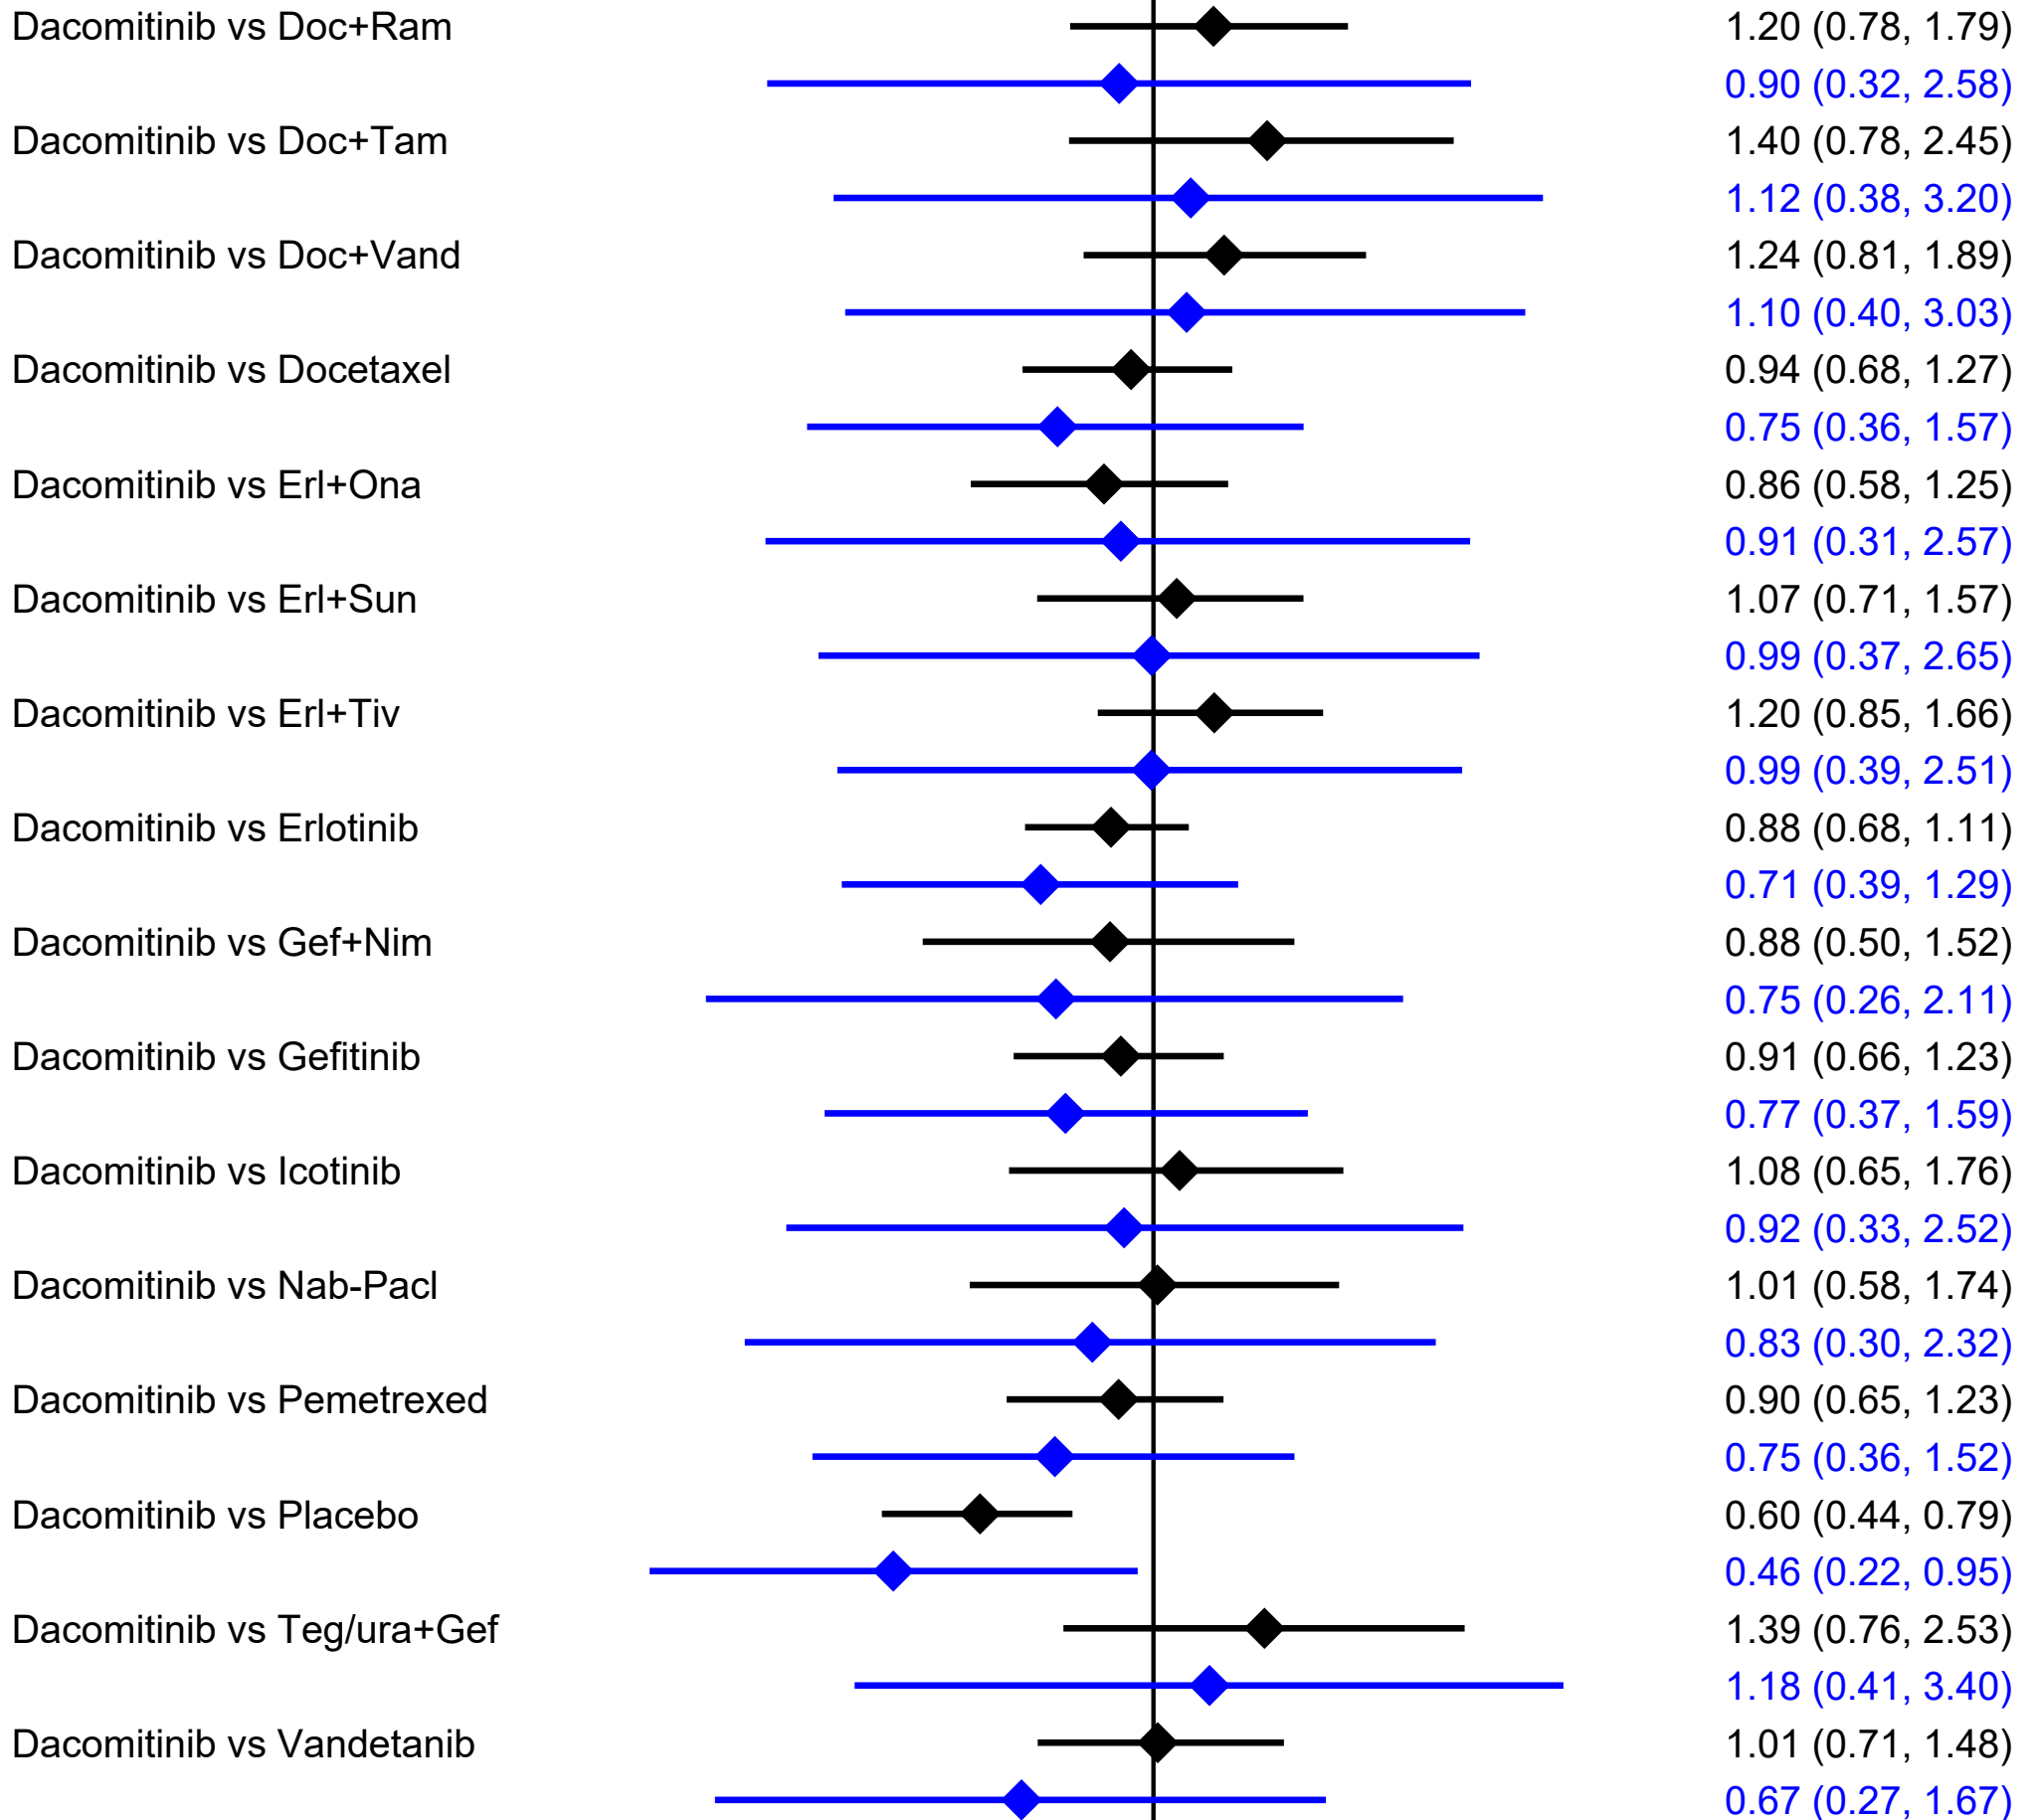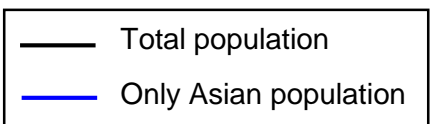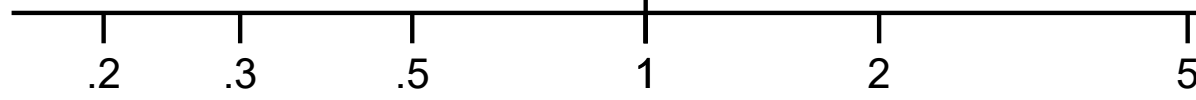

**Comparison**

**Progression Free Survival**

**HR (95% CrI)**

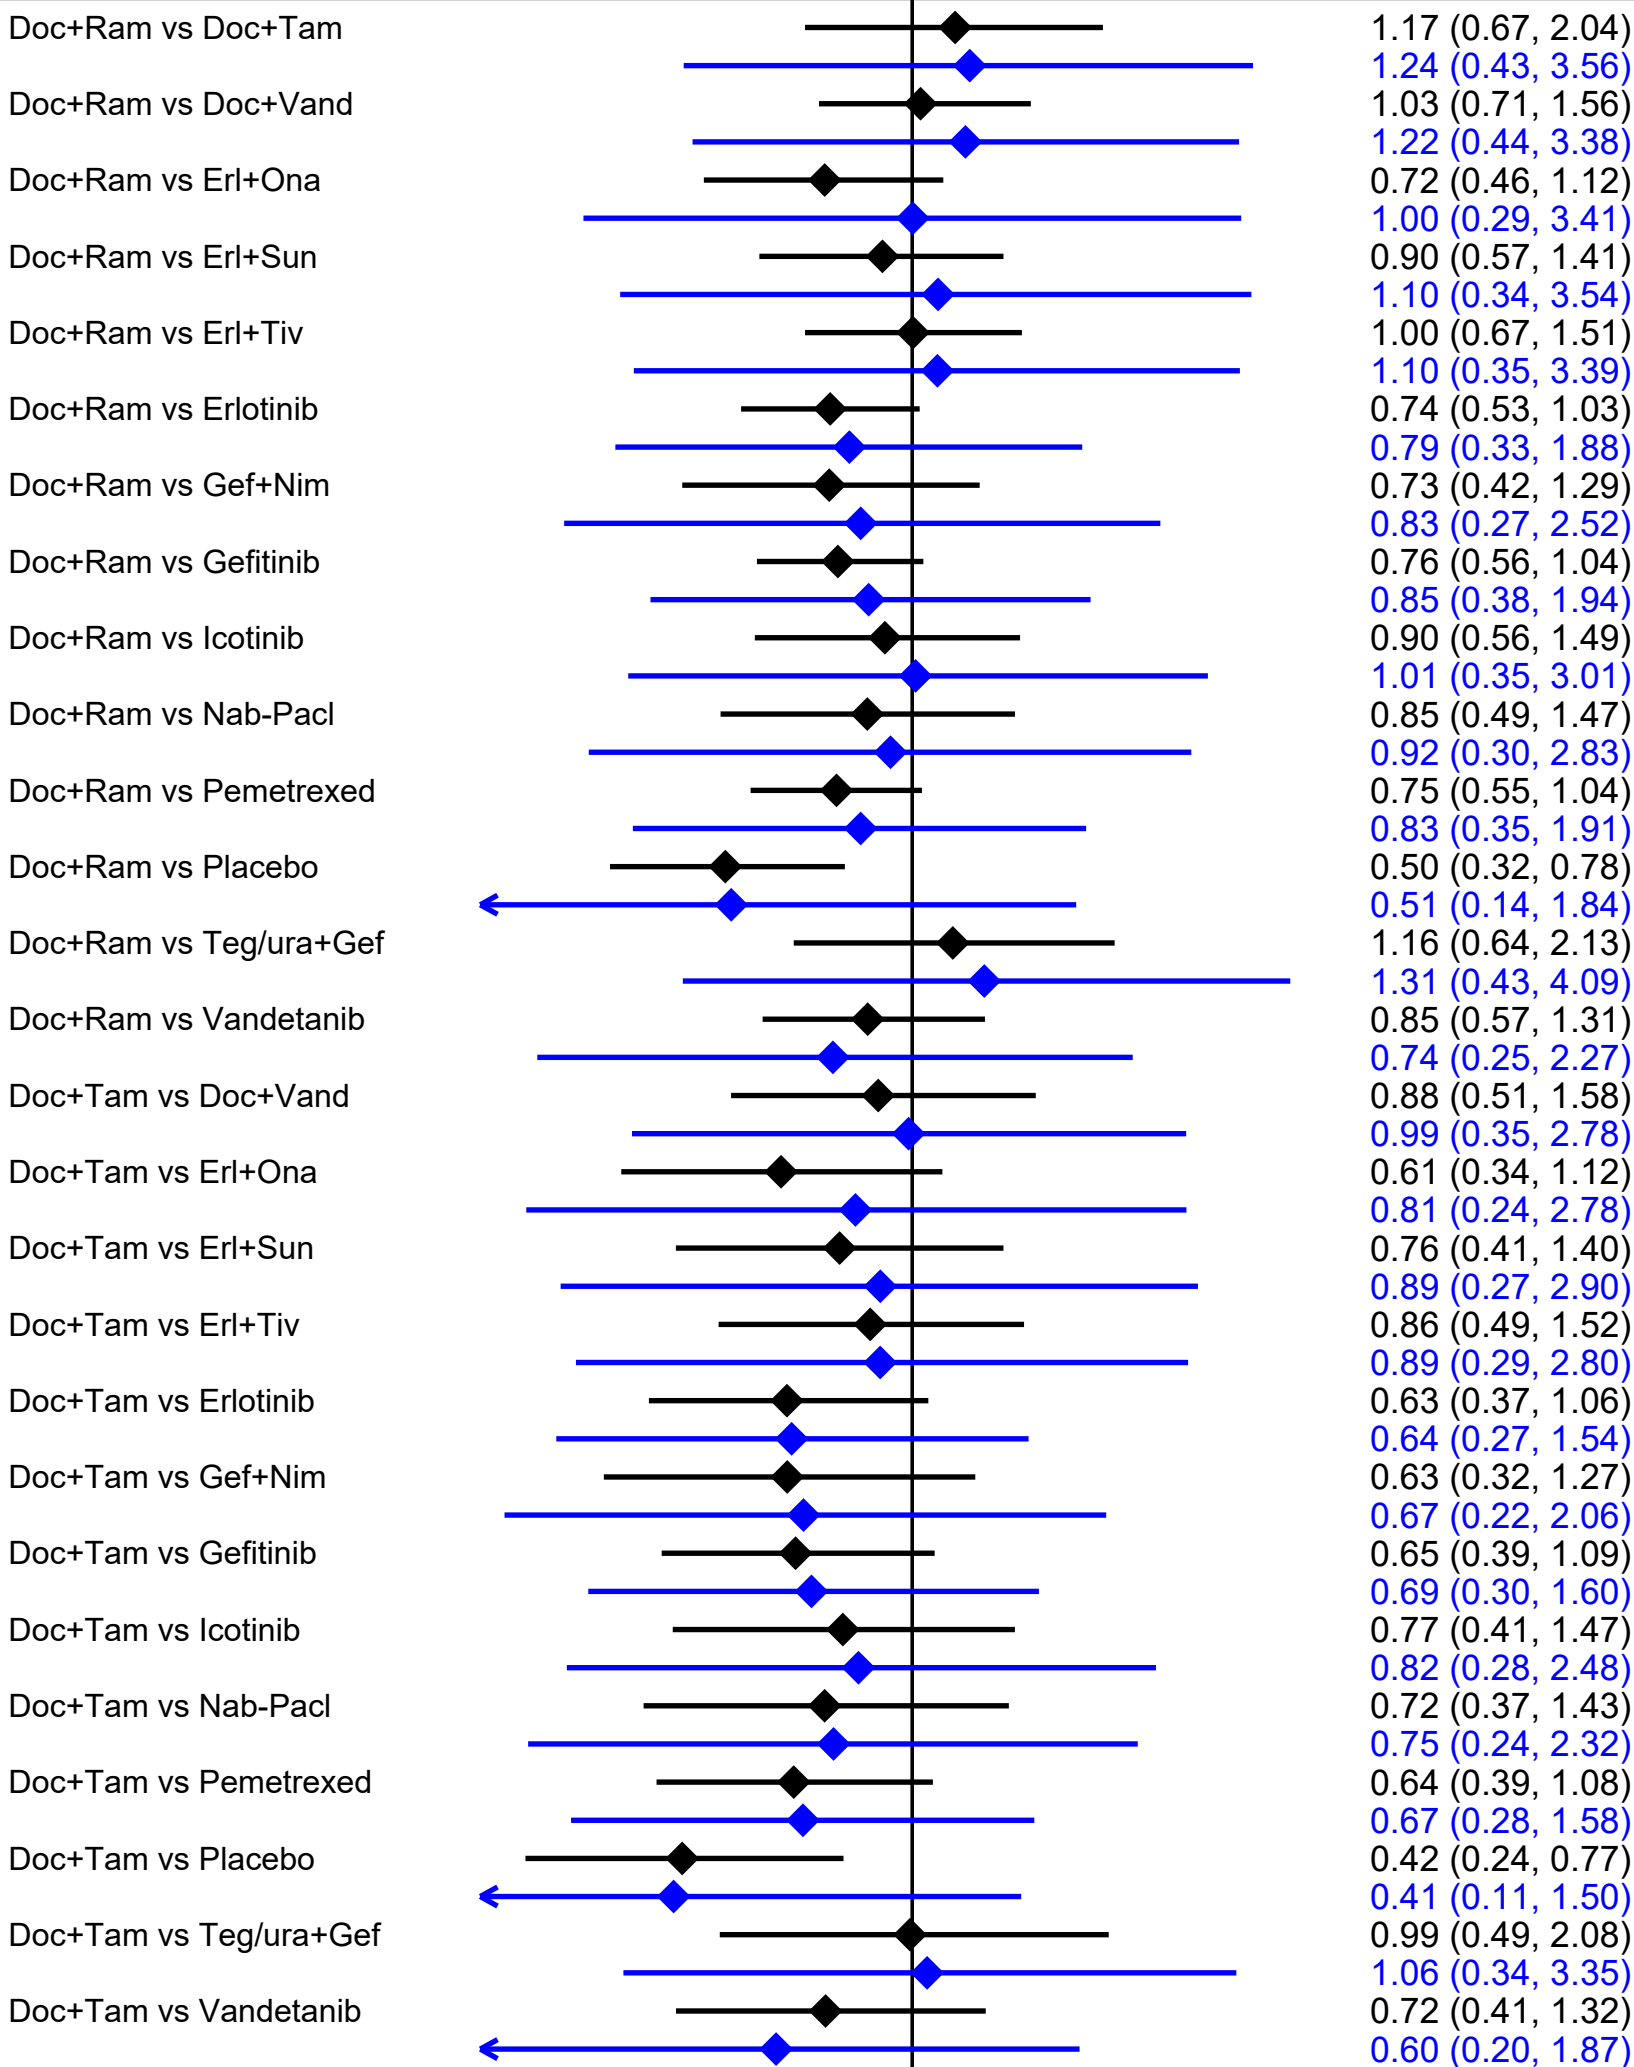

— Total population  
 — Only Asian population

.2 .3 .5 1 2 5



**Comparison**

**Progression Free Survival**

**HR (95% CrI)**

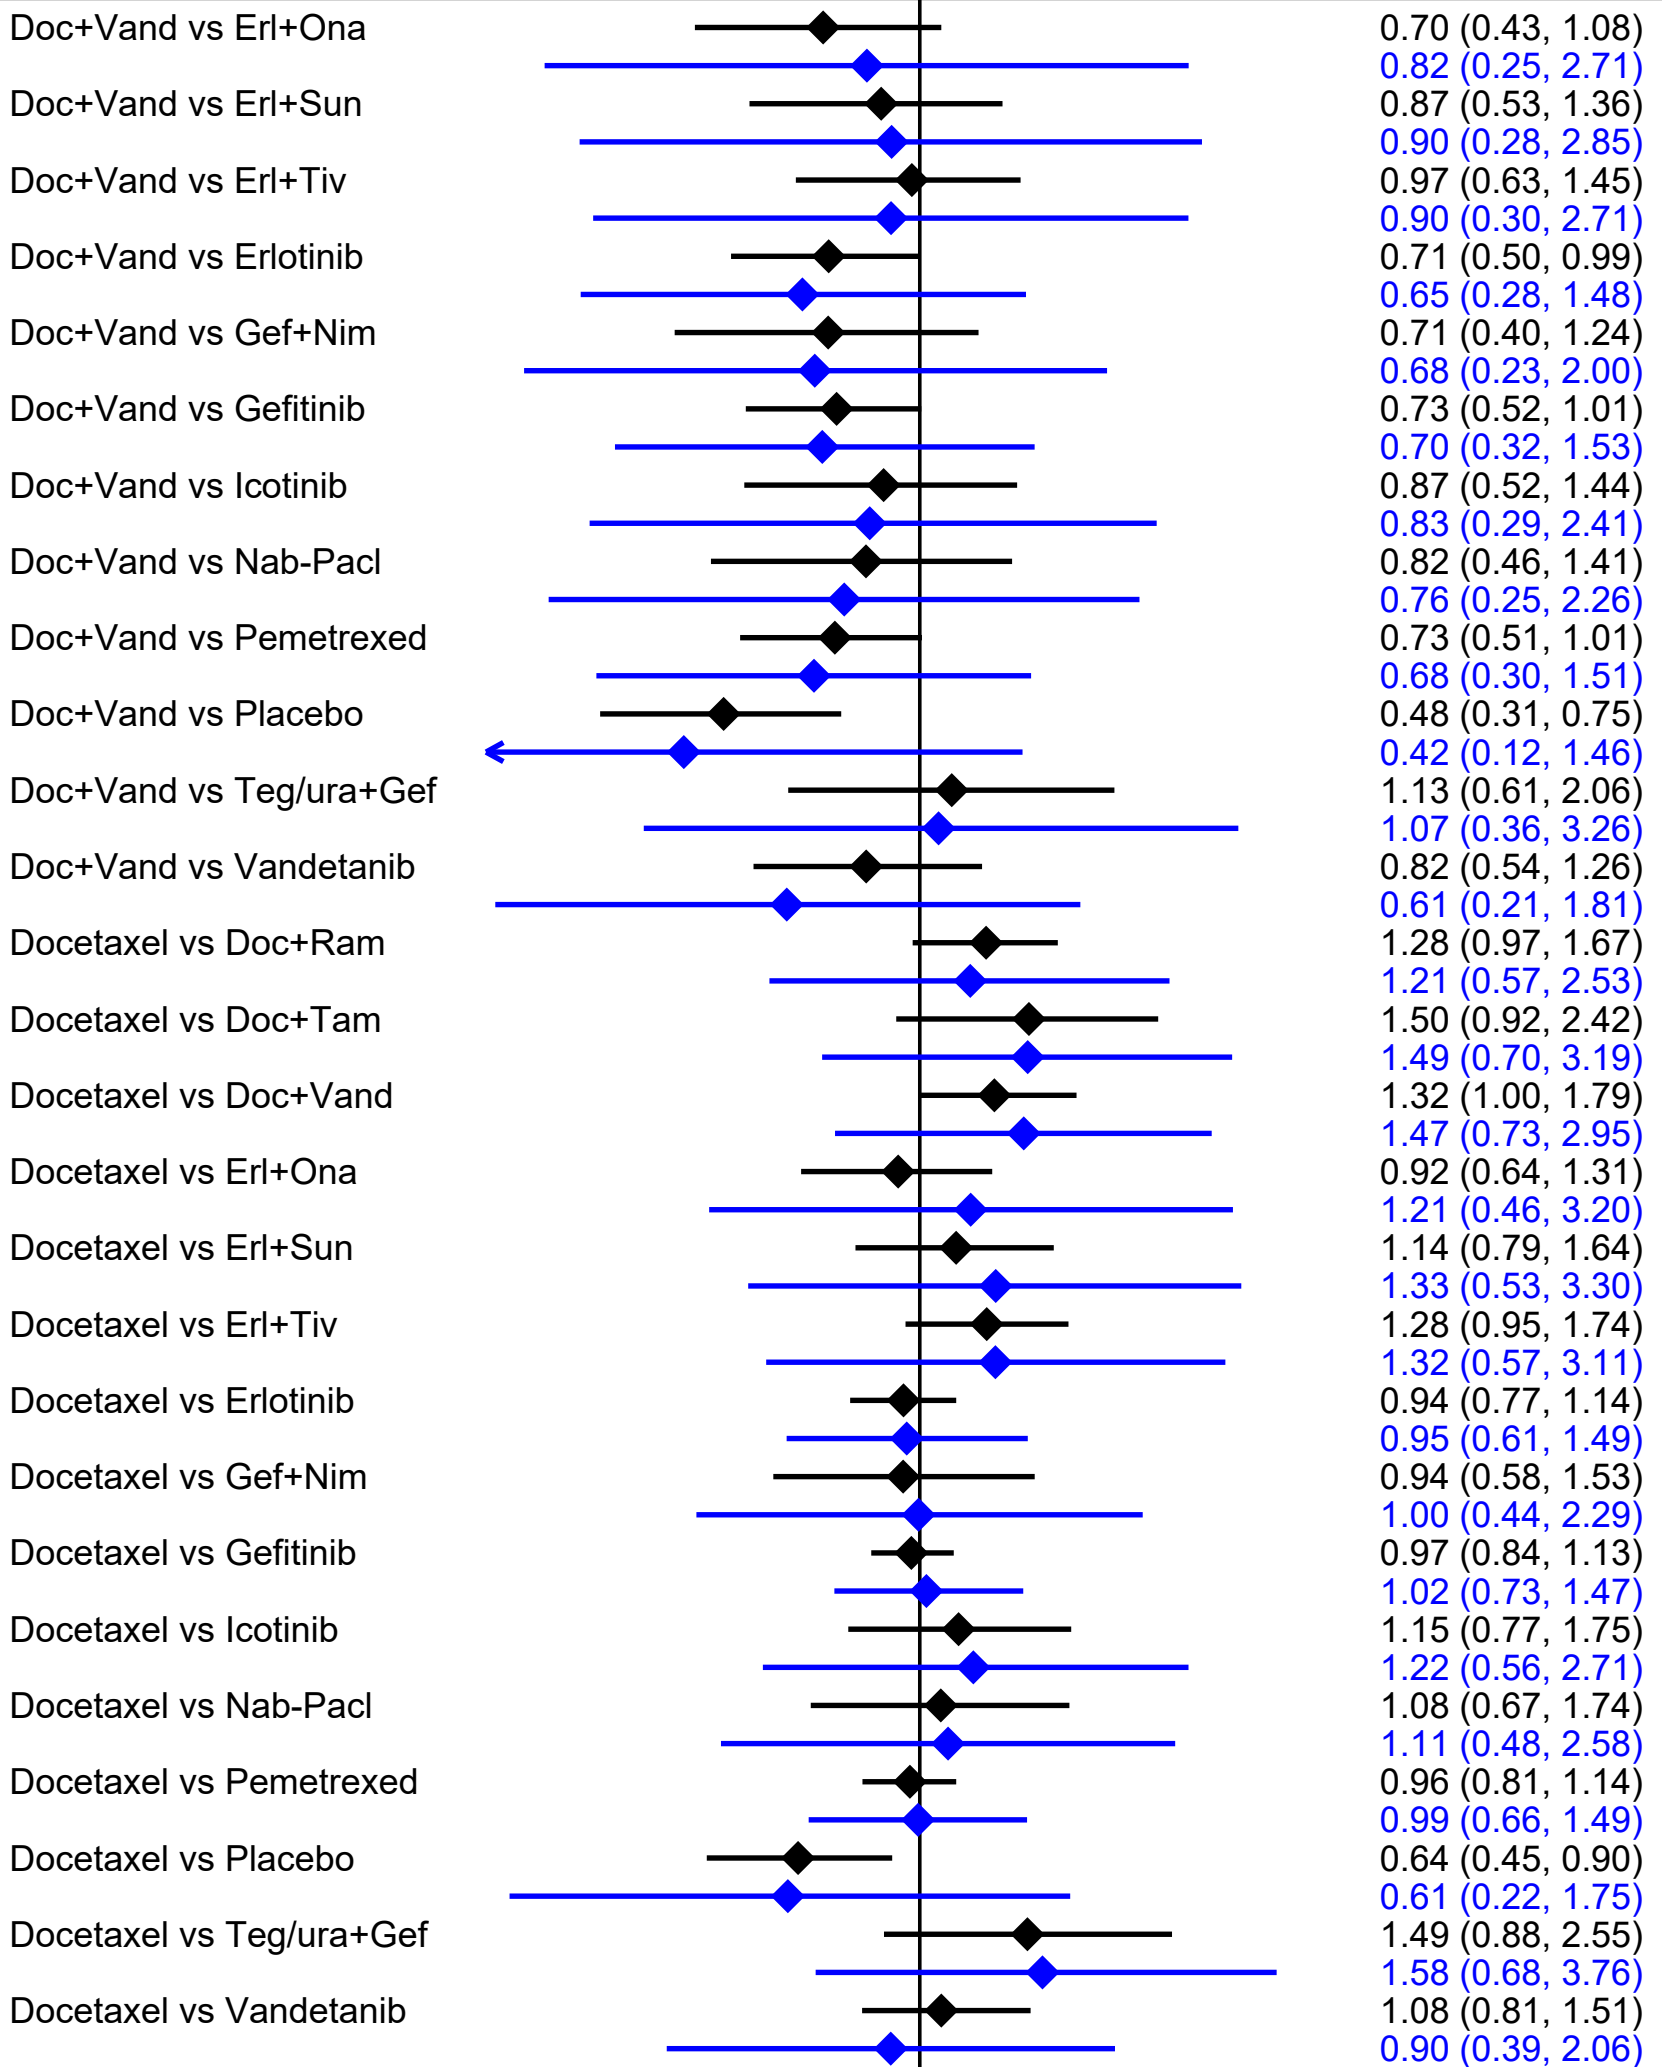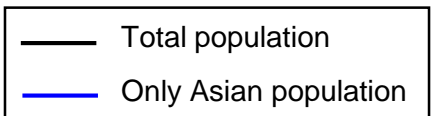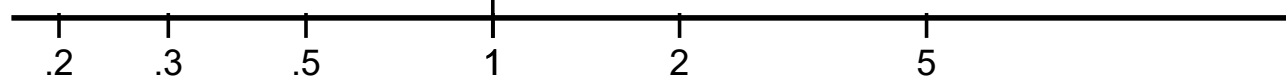

**Comparison**

**Progression Free Survival**

**HR (95% CI)**

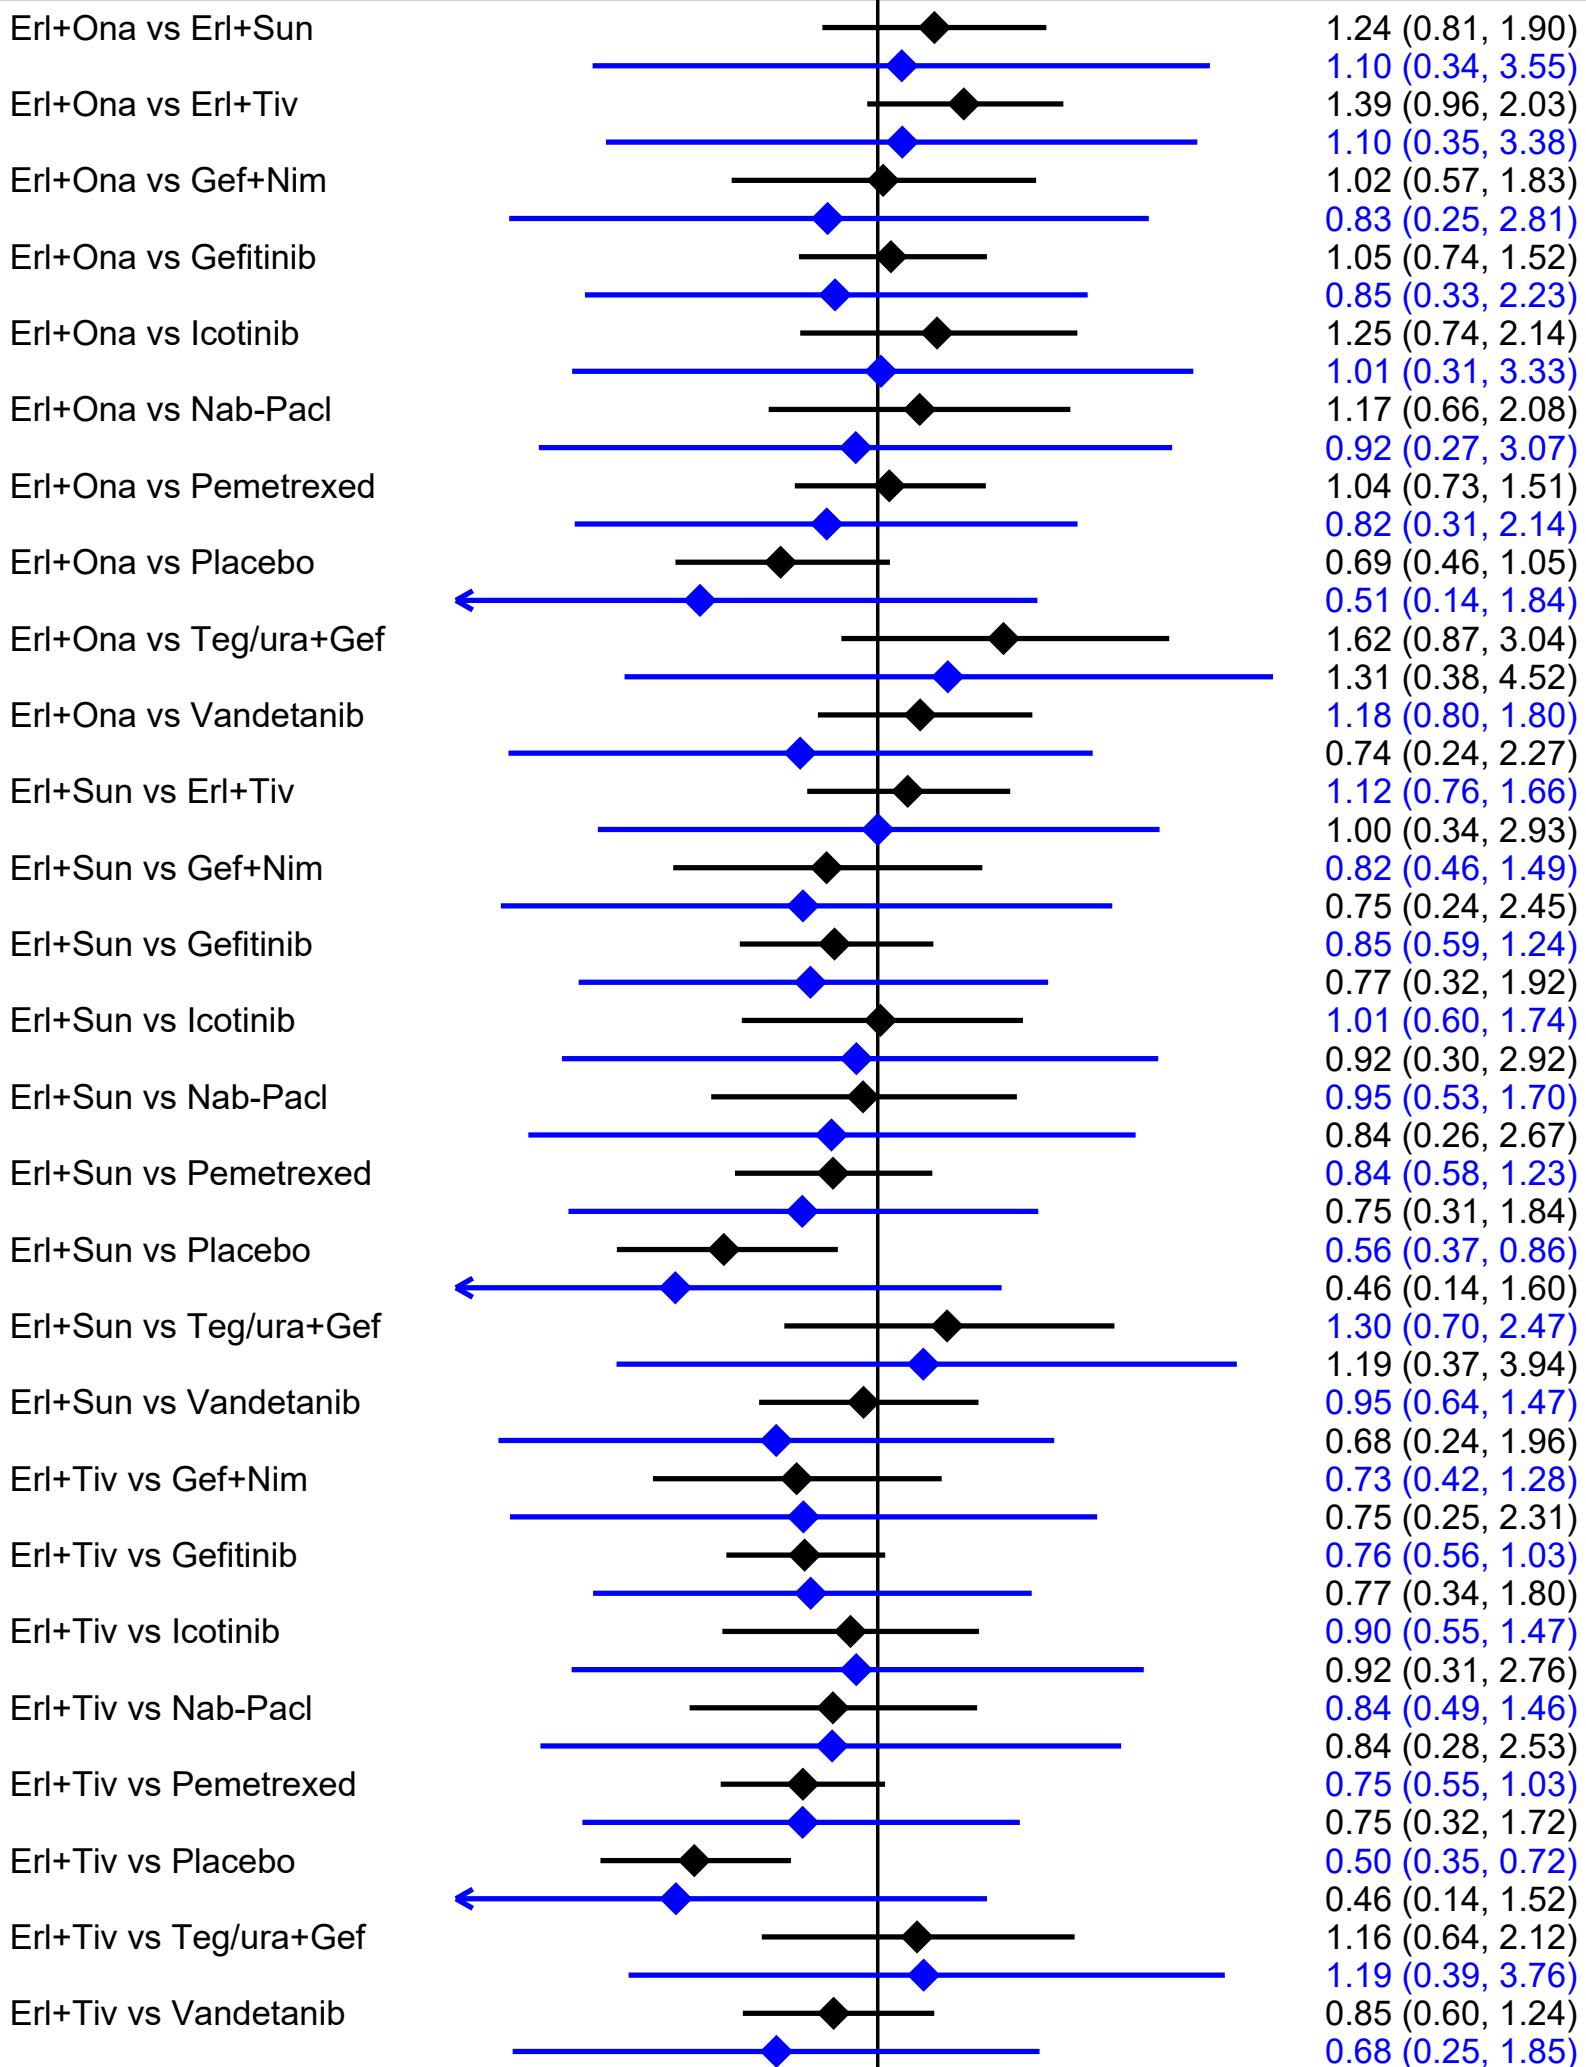

 Total population  
 Only Asian population

.2 .3 .5 1 2 5

**Comparison**

**Progression Free Survival**

**HR (95% CrI)**

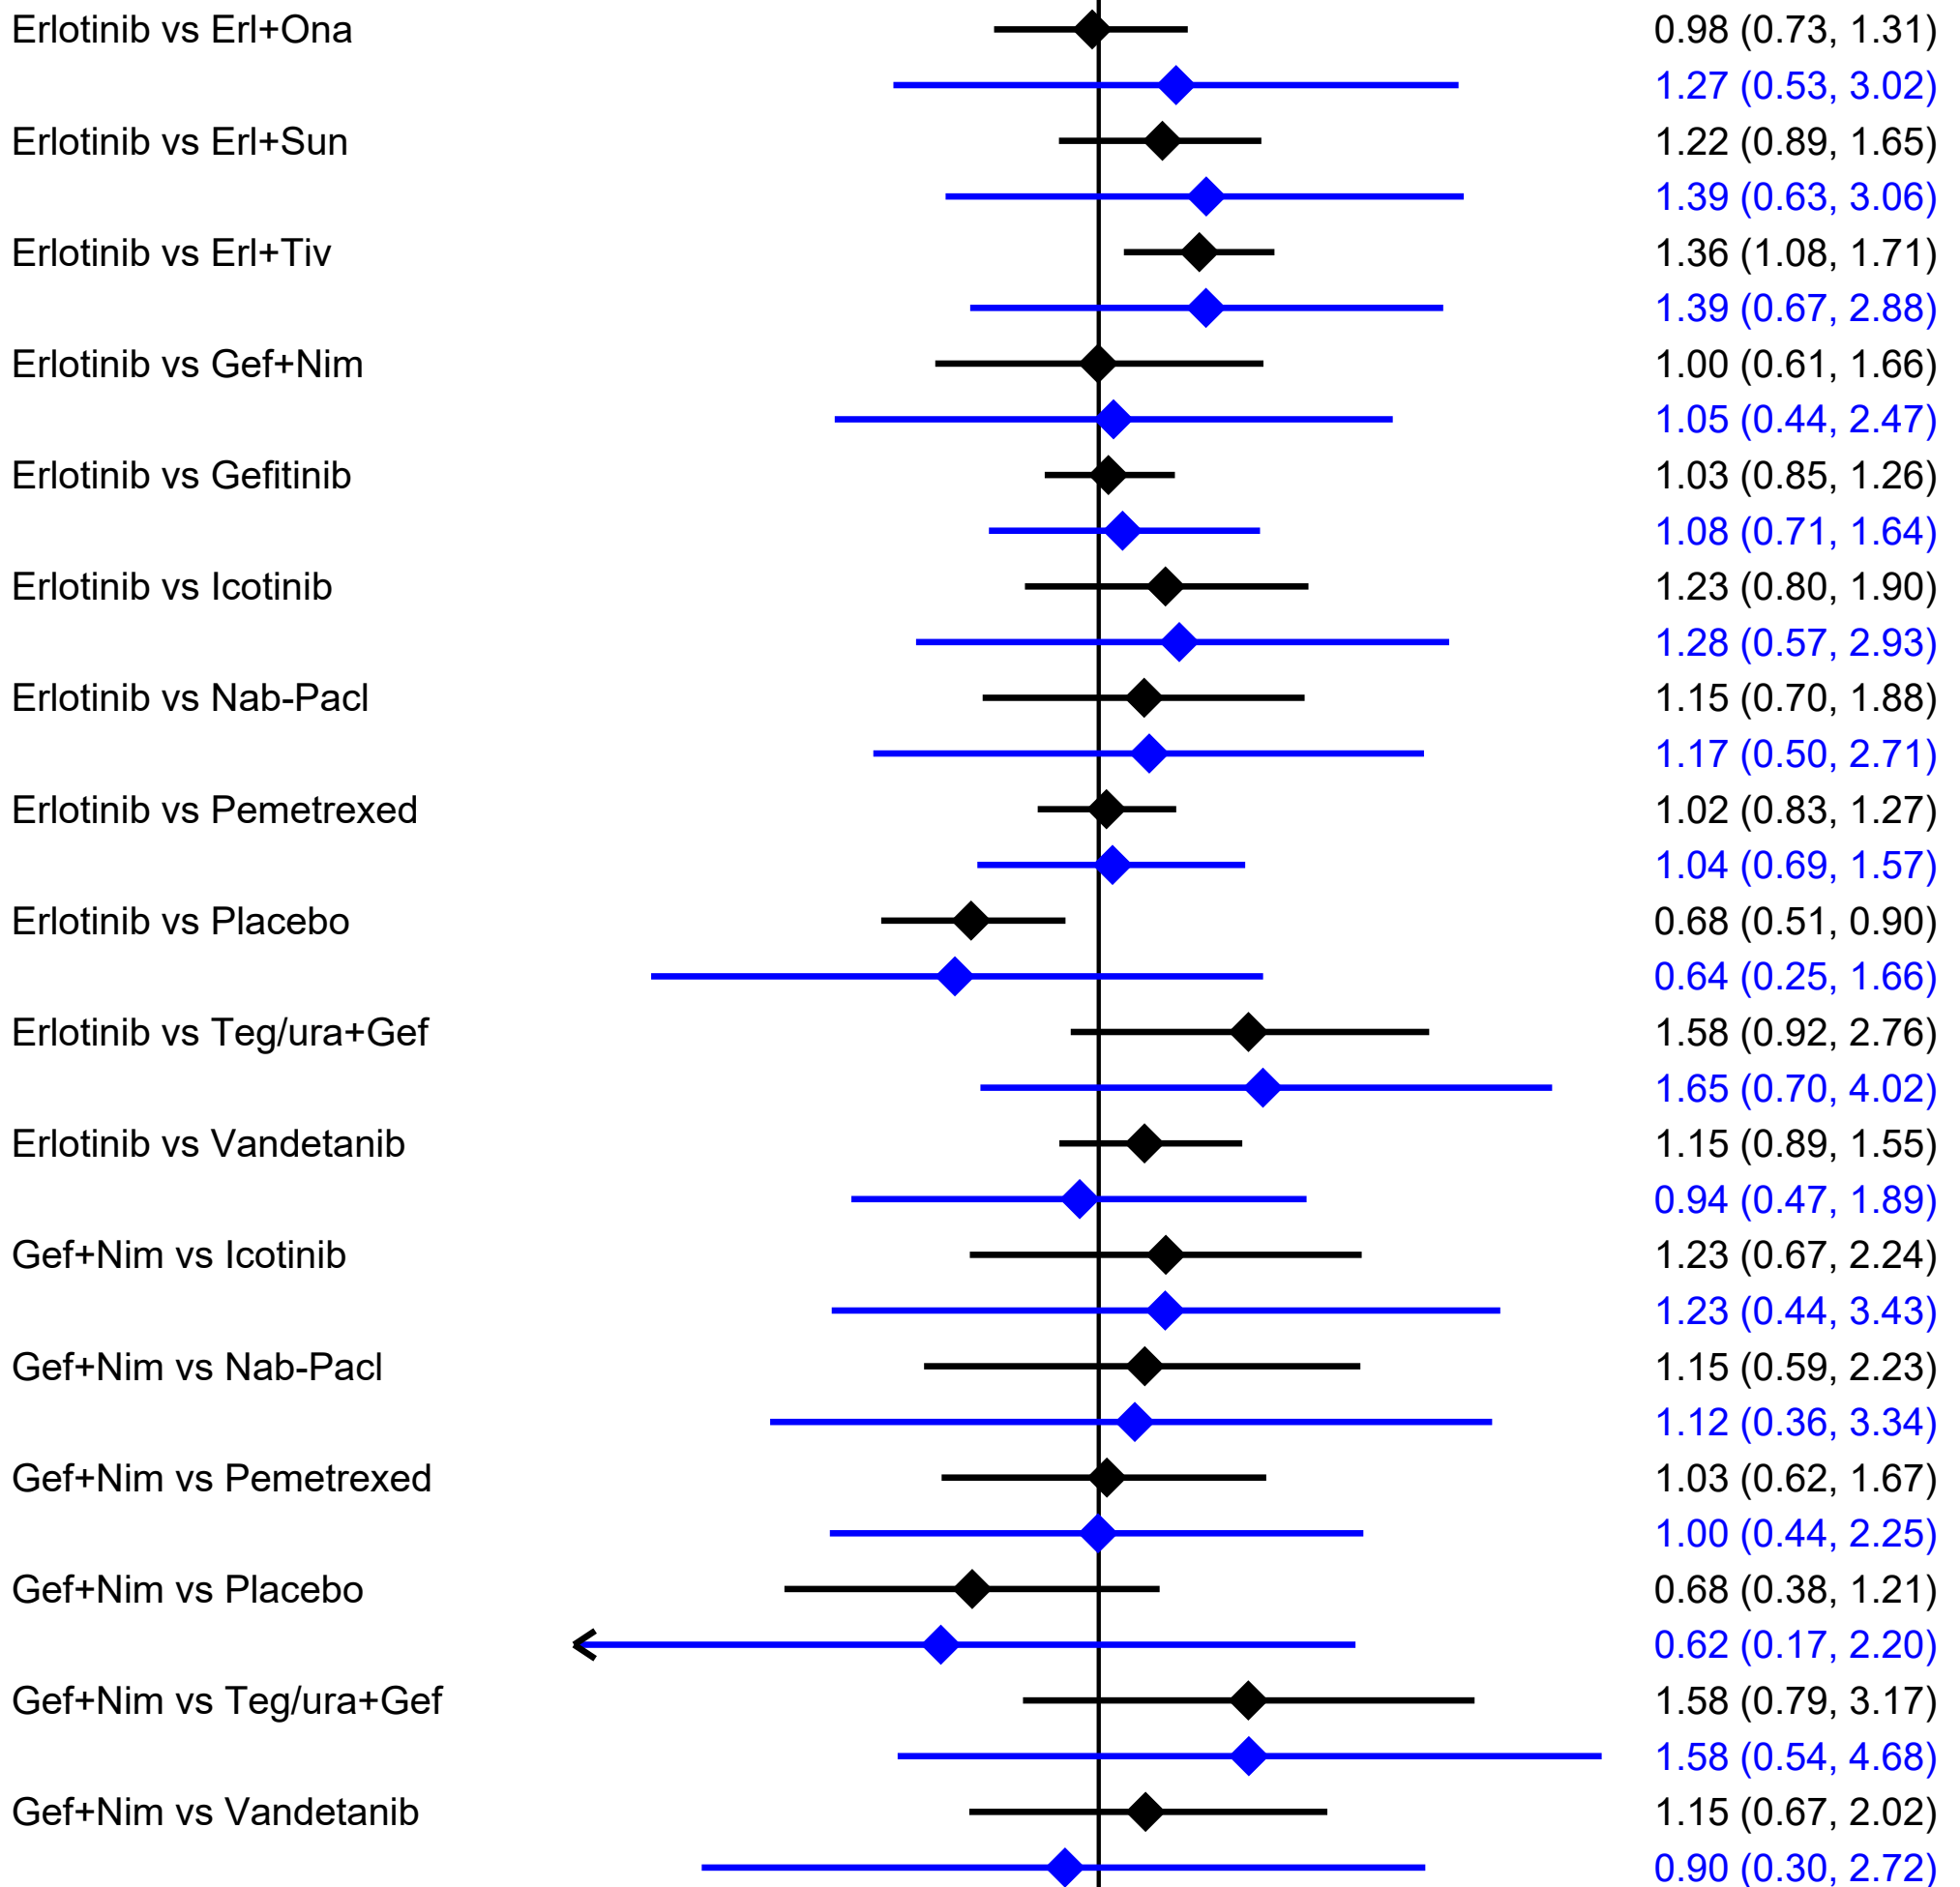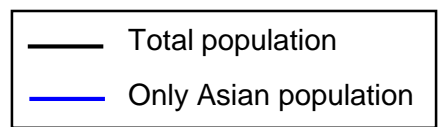

.2 .3 .5 1 2 5

**Comparison**

**Progression Free Survival**

**HR (95% CrI)**

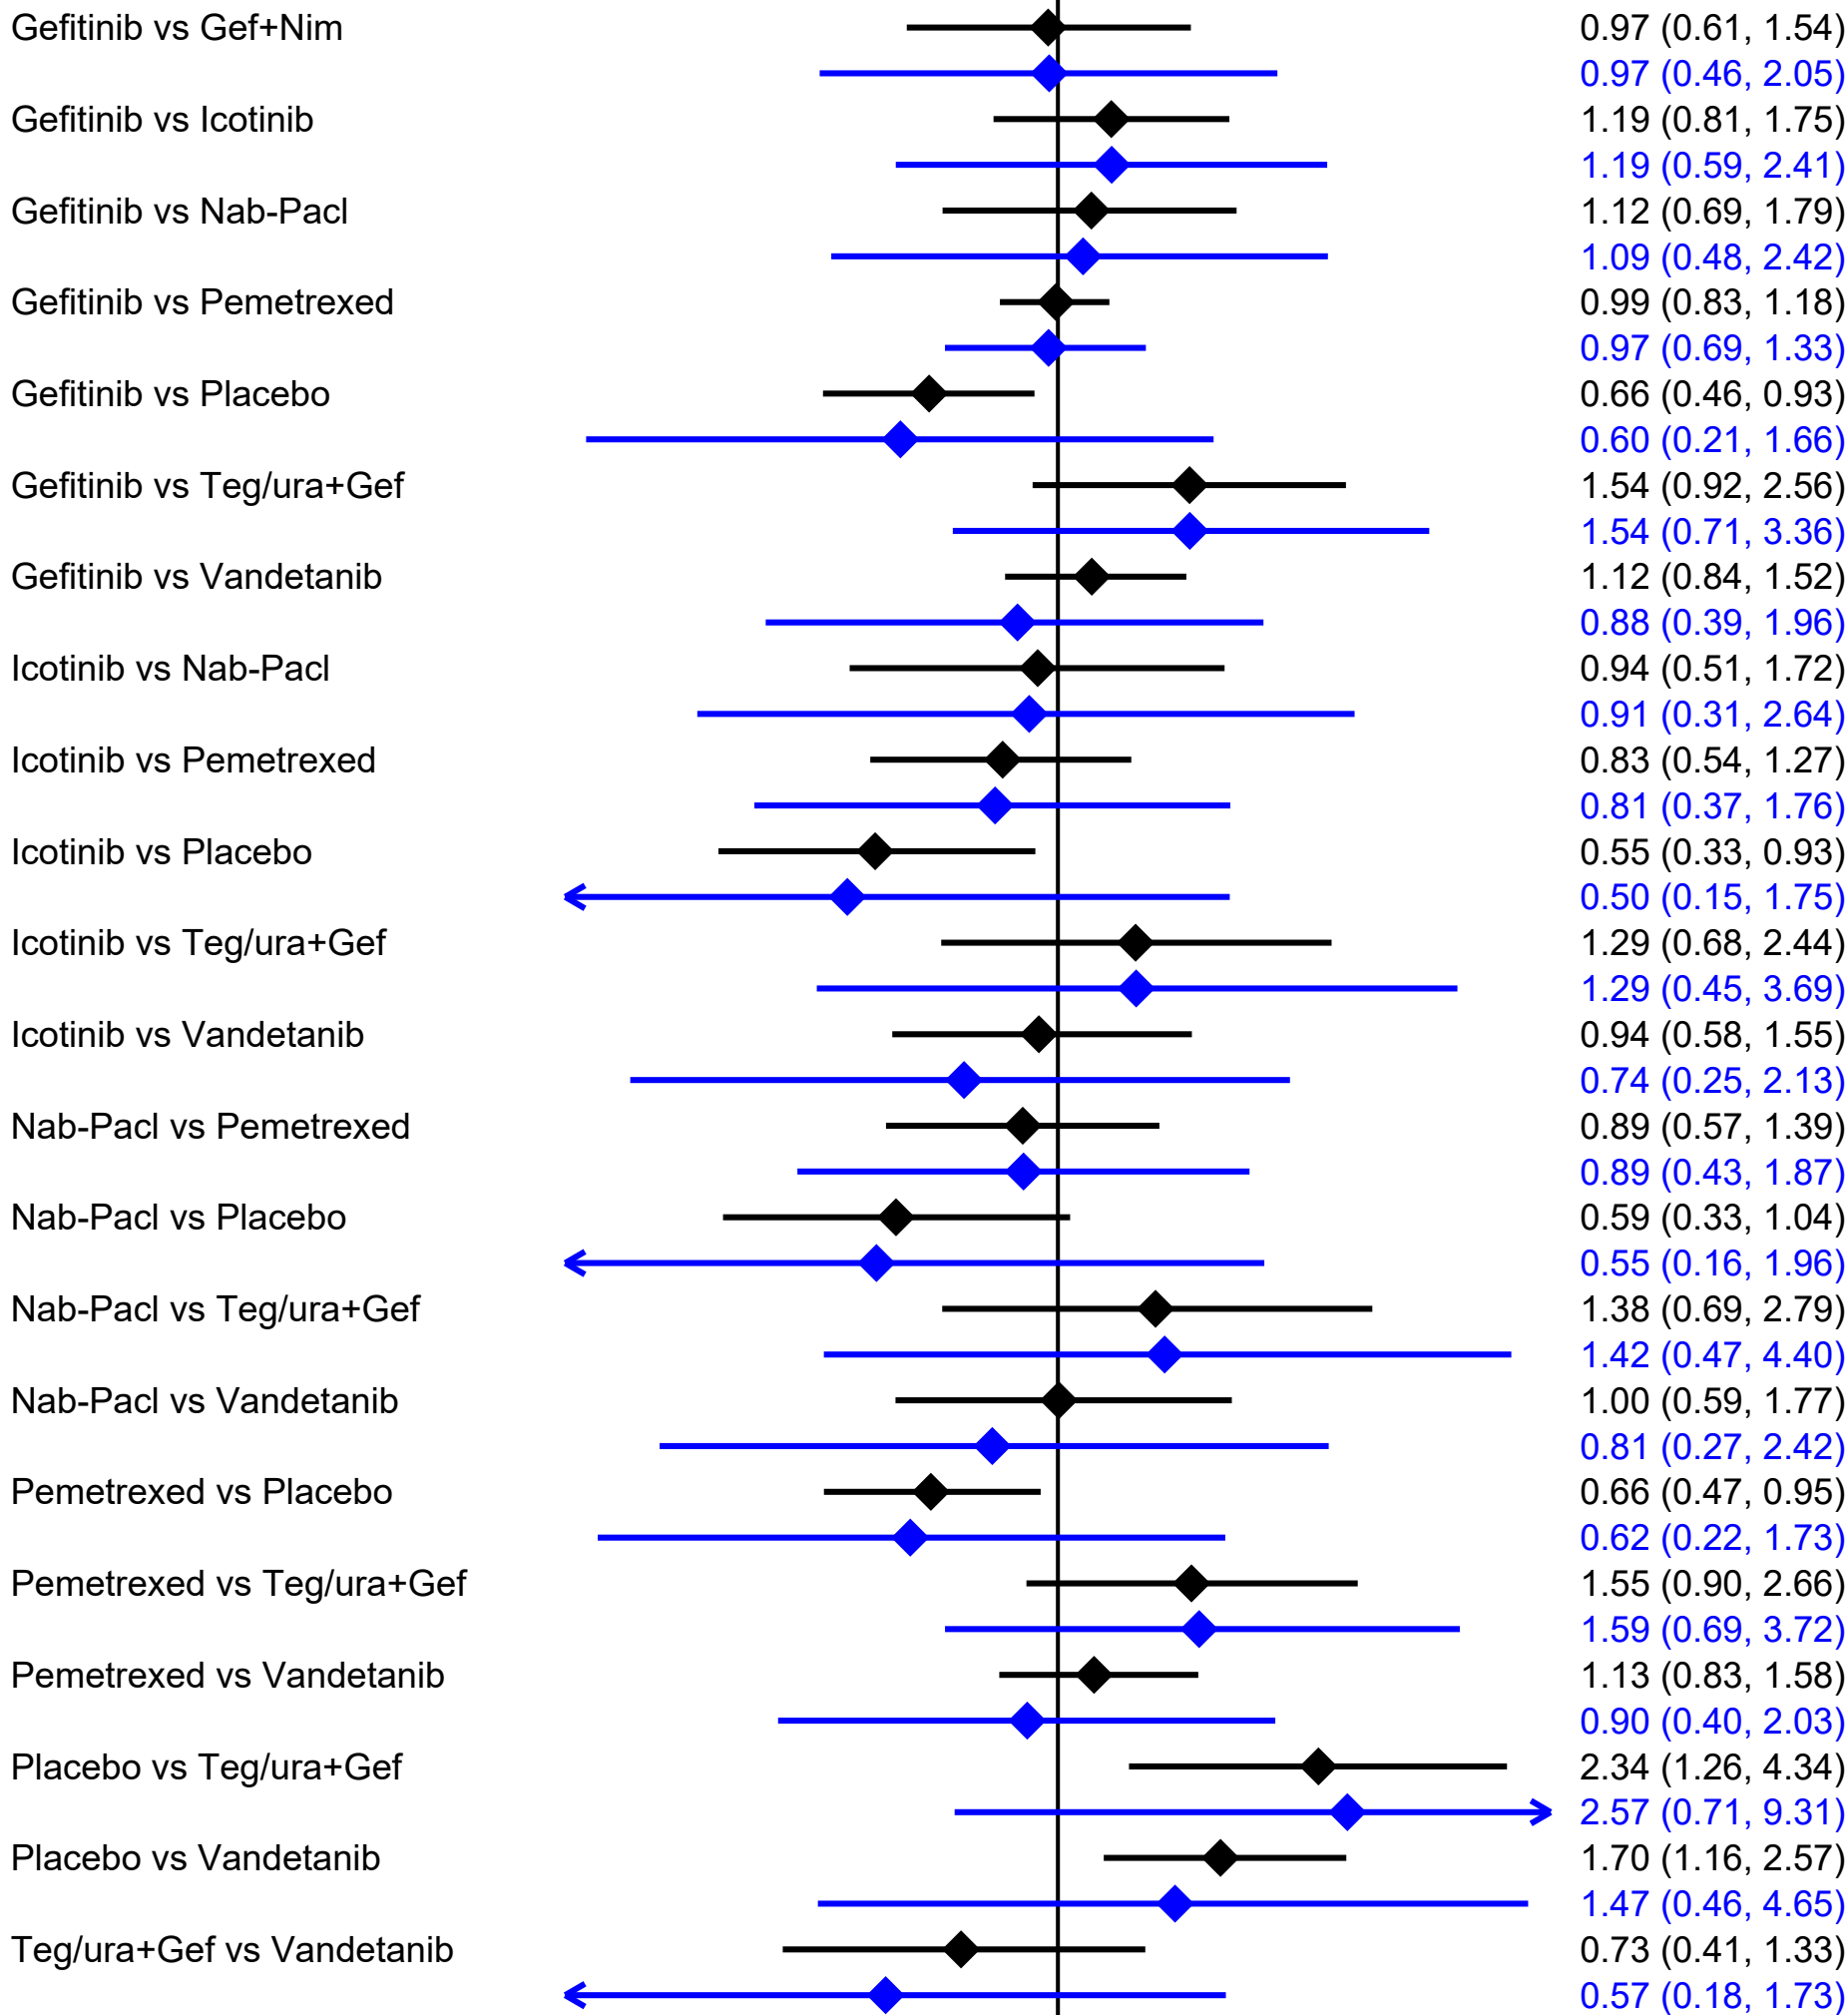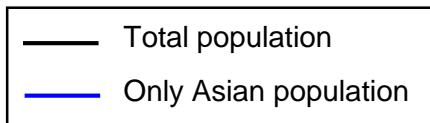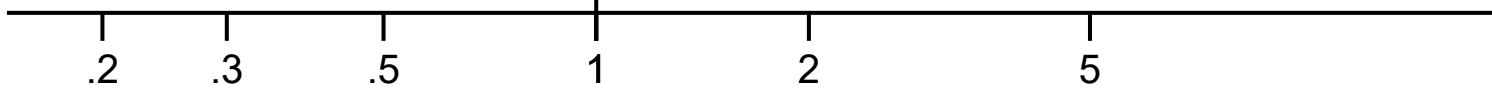

**SUCRA values for OS for second-line treatments assessed in squamous and nonsquamous NSCLC EGFR wild-type or unknown**

**Nonsquamous cell carcinoma**

| <b>Treatment</b>         | <b>SUCRA</b> |
|--------------------------|--------------|
| Pembrolizumab            | 94.2         |
| Atezolizumab             | 88.9         |
| Nivolumab                | 87.6         |
| Erlotinib+Cabozantinib   | 80.2         |
| Docetaxel+Nintedanib     | 78.7         |
| Docetaxel+Ramucirumab    | 78.7         |
| Docetaxel+Vandetanib     | 72.8         |
| Pralatrexate             | 67.5         |
| Trametinib               | 64.5         |
| Cabozantinib             | 62.9         |
| Docetaxel                | 62.5         |
| Amrubicin                | 61.9         |
| Docetaxel+Aflibercept    | 61.5         |
| Docetaxel+Selumetinib    | 60.7         |
| Pemetrexed+Erlotinib     | 54.9         |
| Pemetrexed+Vandetanib    | 41.1         |
| Erlotinib+Tivantinib     | 39.6         |
| Gefitinib+Tegafur-uracil | 38.6         |
| Erlotinib+Sunitinib      | 36.9         |
| Dacomitinib              | 31.6         |
| Vandetanib               | 31.3         |
| Erlotinib                | 29.9         |
| Pemetrexed+Cetuximab     | 28.2         |
| Erlotinib+Bevacizumab    | 23.8         |
| Pemetrexed+Nintedanib    | 20.8         |
| Pemetrexed               | 20.6         |
| Gefitinib                | 17.6         |
| Erlotinib+Onartuzumab    | 07.8         |
| Placebo                  | 04.6         |

**Squamous cell carcinoma**

| <b>Treatment</b>      | <b>SUCRA</b> |
|-----------------------|--------------|
| Nivolumab             | 75.5         |
| Atezolizumab          | 69.8         |
| Pembrolizumab         | 65.8         |
| Amrubicin             | 59.7         |
| Afatinib              | 58.2         |
| Docetaxel+Ramucirumab | 57.5         |
| Docetaxel+Erlotinib   | 53.5         |
| Erlotinib+Onartuzumab | 52.5         |
| Docetaxel+Vandetanib  | 51.4         |
| Erlotinib+Bevacizumab | 50.5         |
| Docetaxel             | 49.8         |
| Docetaxel+Nintedanib  | 49.6         |
| Erlotinib+Sunitinib   | 49.5         |
| Erlotinib             | 45.5         |
| Pralatrexate          | 43.0         |
| Erlotinib+Figitumumab | 40.6         |
| Dacomitinib           | 36.7         |
| Vandetanib            | 33.5         |
| Placebo               | 25.7         |
| Docetaxel+Selumetinib | 24.9         |

**SUCRA values for PFS for second-line treatments assessed in squamous and nonsquamous NSCLC EGFR wild-type or unknown**

**Nonsquamous cell carcinoma**

| <b>Treatment</b>         | <b>SUCRA</b> |
|--------------------------|--------------|
| Erlotinib+Cabozantinib   | 89.8         |
| Cabozantinib             | 88.7         |
| Docetaxel+Vandetanib     | 74.2         |
| Pralatrexate             | 71.3         |
| Docetaxel+Ramucirumab    | 67.6         |
| Docetaxel+Erlotinib      | 67.5         |
| Pemetrexed+Erlotinib     | 63.4         |
| Docetaxel+Aflibercept    | 62.6         |
| Docetaxel+Nintedanib     | 60.4         |
| Pembrolizumab            | 58.4         |
| Erlotinib+Tivantinib     | 57.8         |
| Gefitinib+Tegafur-uracil | 54.7         |
| Docetaxel+Selumetinib    | 54.3         |
| Amrubicin                | 53.1         |
| Nivolumab                | 52.3         |
| Dacomitinib              | 51.0         |
| Docetaxel                | 43.8         |
| Erlotinib+Sunitinib      | 43.2         |
| Vandetanib               | 40.9         |
| Pemetrexed+Vandetanib    | 39.4         |
| Pemetrexed+Nintedanib    | 35.2         |
| Erlotinib+Onartuzumab    | 30.0         |
| Icotinib                 | 29.9         |
| Trametinib               | 29.0         |
| Pemetrexed+Cetuximab     | 25.1         |
| Erlotinib                | 24.6         |
| Pemetrexed               | 16.9         |
| Gefitinib                | 15.3         |

**Squamous cell carcinoma**

| <b>Treatment</b>      | <b>SUCRA</b> |
|-----------------------|--------------|
| Nivolumab             | 79.5         |
| Docetaxel+Vandetanib  | 71.4         |
| Docetaxel+Ramucirumab | 71.1         |
| Docetaxel+Nintedanib  | 70.5         |
| Amrubicin             | 64.6         |
| Pembrolizumab         | 64.4         |
| Docetaxel             | 56.3         |
| Erlotinib+Sunitinib   | 44.2         |
| Docetaxel+Selumetinib | 43.6         |
| Afatinib              | 42.7         |
| Docetaxel+Erlotinib   | 39.9         |
| Dacomitinib           | 35.5         |
| Erlotinib             | 28.9         |
| Erlotinib+Figitumumab | 25.5         |
| Vandetanib            | 25.4         |
| Erlotinib+Onartuzumab | 23.6         |

**SUCRA values for OS and PFS for second-line treatments assessed in Asian population of NSCLC EGFR wild-type or unknown**

**OS**

| <b>Treatment</b>         | <b>SUCRA</b> |
|--------------------------|--------------|
| Erlotinib+Onartuzumab    | 89.2         |
| Erlotinib+Tivantinib     | 86.7         |
| Pemetrexed+Nintedanib    | 86.2         |
| Afatinib                 | 78.4         |
| Docetaxel+Tamoxifen      | 67.1         |
| Pemetrexed               | 63.6         |
| Erlotinib+Sunitinib      | 62.9         |
| Docetaxel+Vandetanib     | 58.8         |
| Tegafur/uracil+Gefitinib | 53.3         |
| Icotinib                 | 50.6         |
| Docetaxel+Ramucirumab    | 49.3         |
| Gefitinib                | 47.4         |
| Pemetrexed+Erlotinib     | 43.5         |
| Pemetrexed+Vandetanib    | 43.2         |
| Dacomitinib              | 32.7         |
| Erlotinib                | 31.8         |
| Gefitinib+Nimotuzumab    | 31.1         |
| Docetaxel                | 30.9         |
| Amrubicin                | 30.8         |
| Nab-Paclitaxel           | 30.3         |
| Vandetanib               | 28.9         |
| Placebo                  | 03.5         |

**PFS**

| <b>Treatment</b>         | <b>SUCRA</b> |
|--------------------------|--------------|
| Pemetrexed+Erlotinib     | 89.8         |
| Afatinib                 | 77.4         |
| Tegafur/uracil+Gefitinib | 70.7         |
| Docetaxel+Tamoxifen      | 67.3         |
| Docetaxel+Vandetanib     | 67.2         |
| Dacomitinib              | 60.8         |
| Erlotinib+Tivantinib     | 59.4         |
| Erlotinib+Sunitinib      | 58.7         |
| Icotinib                 | 53.4         |
| Docetaxel+Ramucirumab    | 52.0         |
| Erlotinib+Onartuzumab    | 51.8         |
| Pemetrexed+Vandetanib    | 47.0         |
| Nab-Paclitaxel           | 45.9         |
| Pemetrexed+Nintedanib    | 41.9         |
| Amrubicin                | 40.8         |
| Gefitinib                | 37.6         |
| Gefitinib+Nimotuzumab    | 37.4         |
| Docetaxel                | 34.8         |
| Pemetrexed               | 34.2         |
| Erlotinib                | 29.9         |
| Vandetanib               | 29.3         |
| Placebo                  | 12.6         |

**Appendix Figure 6:  
Funnel plots of  
small-study effects**

**Overall survival**

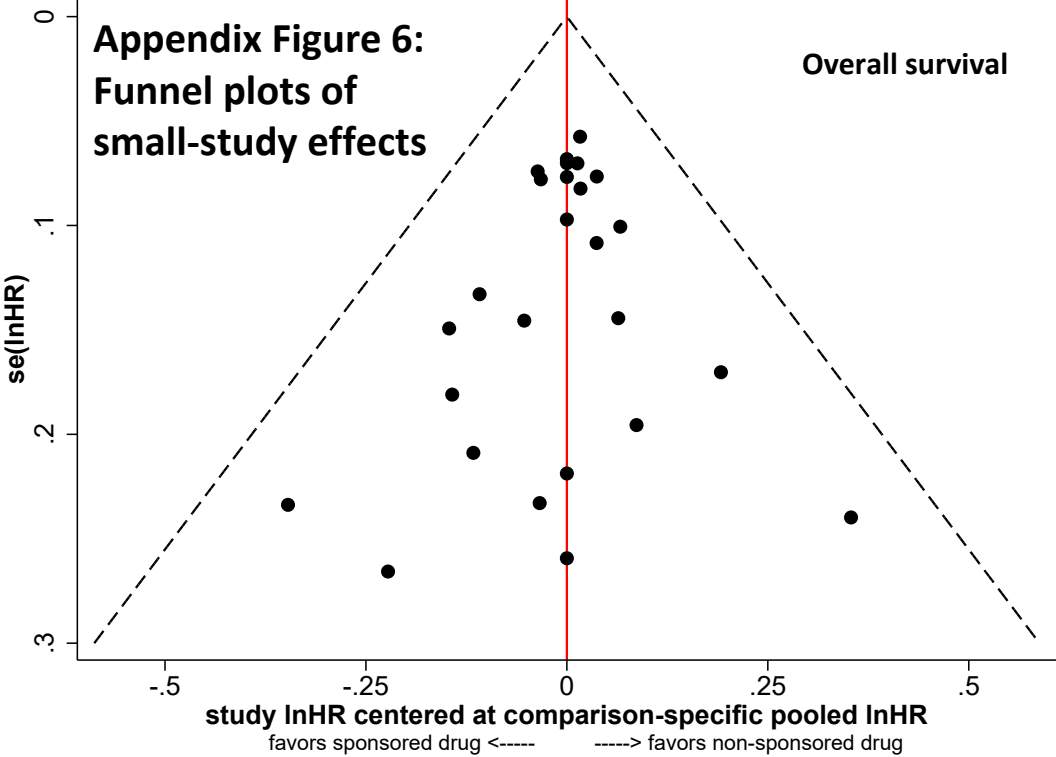



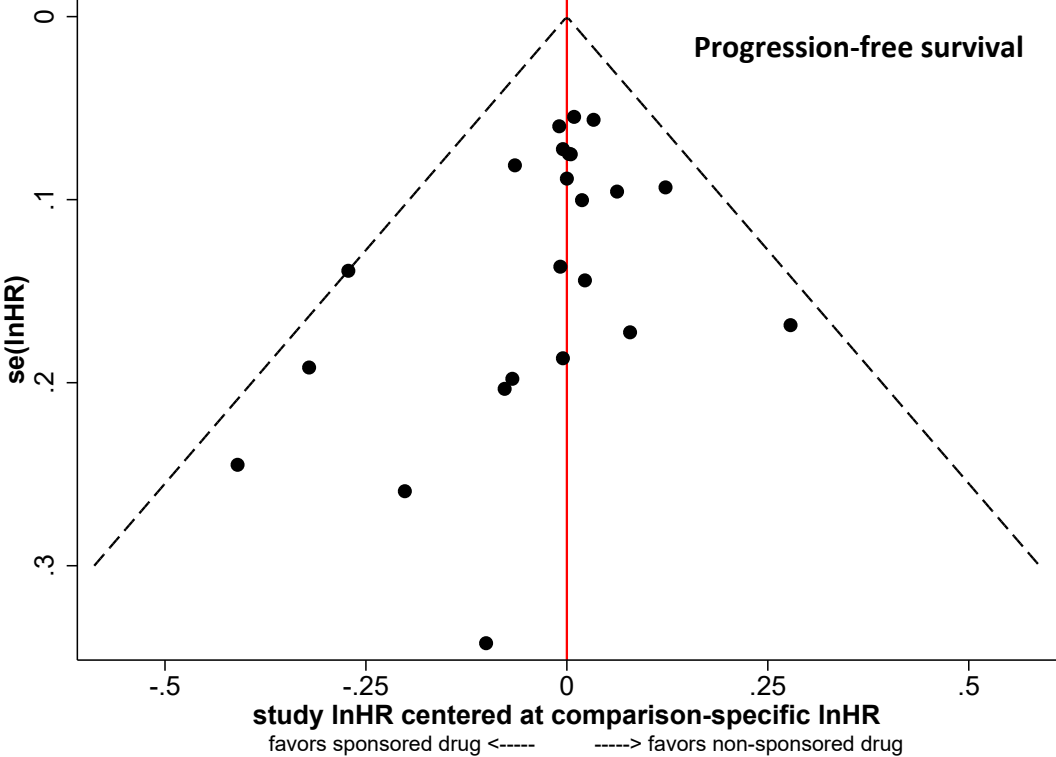

## Appendix Figure 7: Overall assessment of bias

We evaluated the credibility of the evidence from network meta-analysis based on the approach suggested by *Salanti G et al. Evaluating the quality of evidence from a network meta-analysis. PloS One. 2014;9(7): e99682* that extends the GRADE system into network meta-analysis.

To evaluate study limitations we used the online tool CiNeMA available from <http://ec2-52-28-232-32.eu-central-1.compute.amazonaws.com:8004/ocpu/library/contribution/www/> that combines the contribution of each direct comparison to the estimation in the network (see Chaimani et al. Graphical tools for network meta-analysis in Stata. Plos One 2013 and Krahn et al. A graphical tool for locating inconsistency in network meta-analyses. BMC Med Res Methodol 2013) with the risk of bias assessments for each direct comparison and produces a bar-graph. The bar-graph shows for the network estimate of every pairwise comparison how much information comes from low (green), moderate (yellow) or high (red) risk of bias trials.

Below we present our GRADE evaluation for the two primary outcomes and all comparisons presented in our league tables.

# GRADE evaluation for Overall survival

## Study limitations

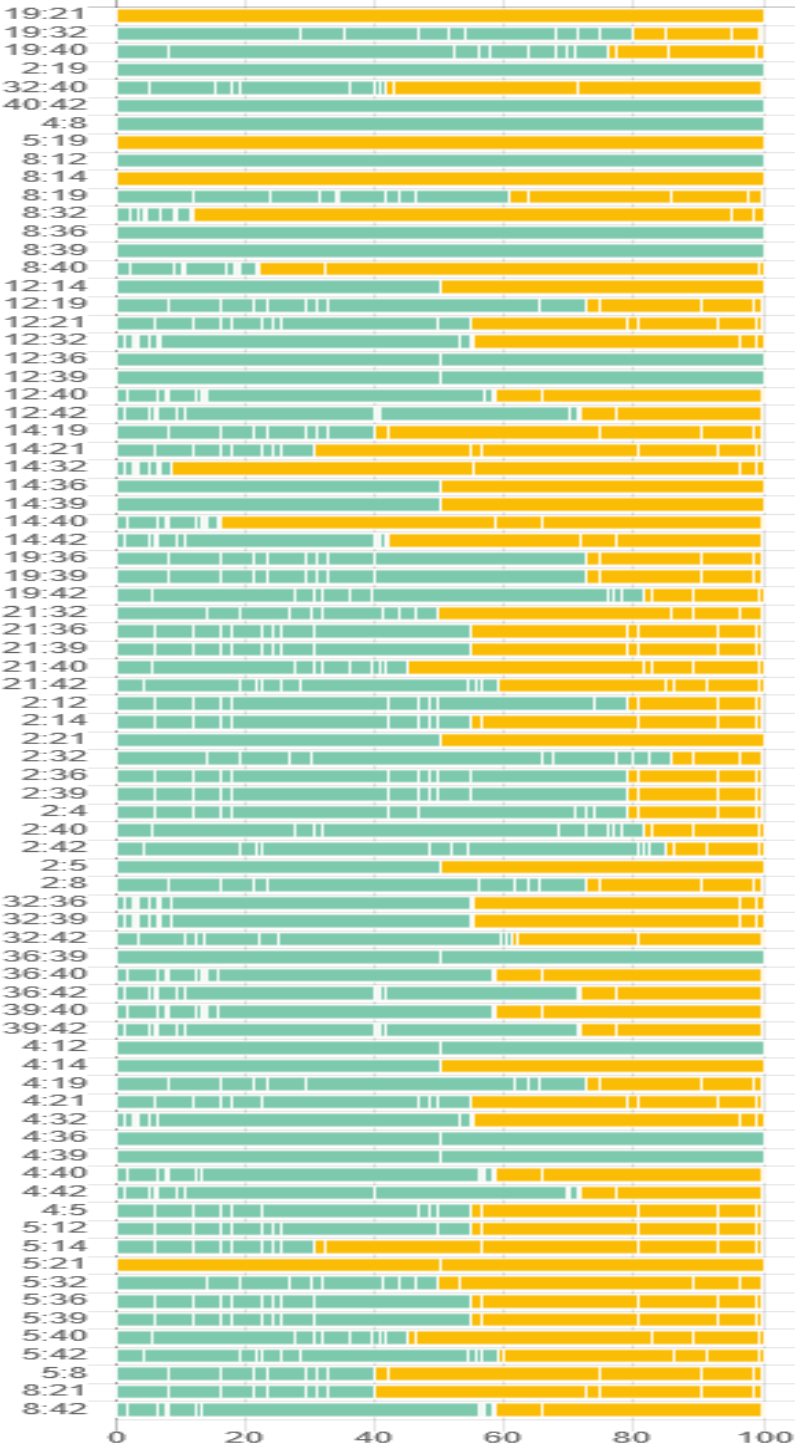

Treatment codes:

8=Docetaxel, 40=Pemetrexed, 19=Erlotinib, 32=Gefitinib, 36=Nivolumab, 39=Pembrolizumab, 4=Atezolizumab, 12=Docetaxel+Nintedanib, 14=Docetaxel+Ramucirumab, 2=Afatinib, 5=Cabozantinib, 21=Erlotinib+Cabozantinib, 42=Pemetrexed+Erlotinib

We have serious concerns for all comparisons that at least 50% of the evidence is at moderate risk of bias

**Indirectness**

Given the small number of trials for most comparisons the transitivity assumption could not be evaluated properly. Therefore, we have serious concerns about intransitivity for all pairwise comparisons.

**Imprecision**

We downgraded all non-significant HRs for imprecision.

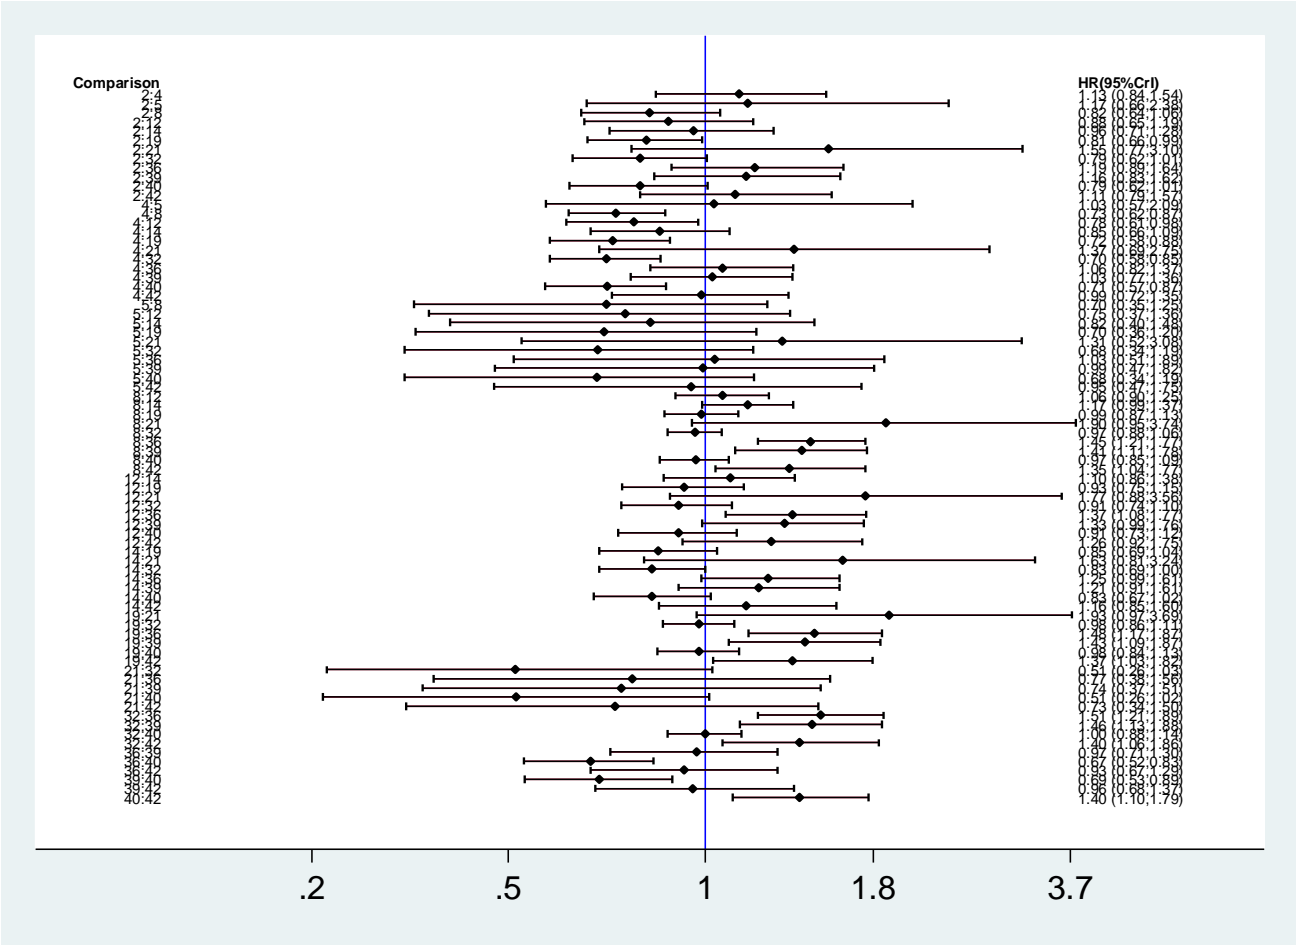

**Heterogeneity**

No empirical distributions for heterogeneity have been suggested for survival outcomes and therefore we rely on the prediction intervals. Given the very small value of the estimated heterogeneity ( $\tau=0.04$ ) the prediction intervals were almost identical with the credible intervals and therefore are not presented in the above graph.

**Inconsistency**

Appendix Figure 4

We have serious concerns for comparisons included in inconsistent loops.

**Publication bias**

Based on the comprehensive search that identified also unpublished trials we do not have serious concerns about the presence of publication bias. Appendix Figure 6 also does not imply the presence of small-study effects.

### Final assessments

| Comparison | Study Limitations   | Indirectness     | Inconsistency       | Imprecision         | Publications bias   | GRADE    | Downgraded for                               |
|------------|---------------------|------------------|---------------------|---------------------|---------------------|----------|----------------------------------------------|
| 2:4        | No serious concerns | Serious concerns | No serious concerns | Serious concerns    | No serious concerns | Moderate | Indirectness, Imprecision                    |
| 2:5        | No serious concerns | Serious concerns | No serious concerns | Serious concerns    | No serious concerns | Moderate | Indirectness, Imprecision                    |
| 2:8        | No serious concerns | Serious concerns | No serious concerns | Serious concerns    | No serious concerns | Moderate | Indirectness, Imprecision                    |
| 2:12       | No serious concerns | Serious concerns | No serious concerns | Serious concerns    | No serious concerns | Moderate | Indirectness, Imprecision                    |
| 2:14       | No serious concerns | Serious concerns | No serious concerns | Serious concerns    | No serious concerns | Moderate | Indirectness, Imprecision                    |
| 2:19       | No serious concerns | Serious concerns | No serious concerns | No serious concerns | No serious concerns | Moderate | Indirectness                                 |
| 2:21       | No serious concerns | Serious concerns | No serious concerns | Serious concerns    | No serious concerns | Moderate | Indirectness, Imprecision                    |
| 2:32       | No serious concerns | Serious concerns | No serious concerns | Serious concerns    | No serious concerns | Moderate | Indirectness, Imprecision                    |
| 2:36       | No serious concerns | Serious concerns | No serious concerns | Serious concerns    | No serious concerns | Moderate | Indirectness, Imprecision                    |
| 2:39       | No serious concerns | Serious concerns | No serious concerns | Serious concerns    | No serious concerns | Moderate | Indirectness, Imprecision                    |
| 2:40       | No serious concerns | Serious concerns | No serious concerns | Serious concerns    | No serious concerns | Moderate | Indirectness, Imprecision                    |
| 2:42       | No serious concerns | Serious concerns | No serious concerns | Serious concerns    | No serious concerns | Moderate | Indirectness, Imprecision                    |
| 4:5        | No serious concerns | Serious concerns | No serious concerns | Serious concerns    | No serious concerns | Moderate | Indirectness, Imprecision                    |
| 4:8        | No serious concerns | Serious concerns | No serious concerns | No serious concerns | No serious concerns | Moderate | Indirectness                                 |
| 4:12       | No serious concerns | Serious concerns | No serious concerns | Serious concerns    | No serious concerns | Moderate | Indirectness, Imprecision                    |
| 4:14       | No serious concerns | Serious concerns | No serious concerns | Serious concerns    | No serious concerns | Moderate | Indirectness, Imprecision                    |
| 4:19       | No serious concerns | Serious concerns | No serious concerns | No serious concerns | No serious concerns | Moderate | Indirectness                                 |
| 4:21       | No serious concerns | Serious concerns | No serious concerns | Serious concerns    | No serious concerns | Moderate | Indirectness, Imprecision                    |
| 4:32       | No serious concerns | Serious concerns | No serious concerns | No serious concerns | No serious concerns | Moderate | Indirectness                                 |
| 4:36       | No serious concerns | Serious concerns | No serious concerns | Serious concerns    | No serious concerns | Moderate | Indirectness, Imprecision                    |
| 4:39       | No serious concerns | Serious concerns | No serious concerns | Serious concerns    | No serious concerns | Moderate | Indirectness, Imprecision                    |
| 4:40       | No serious concerns | Serious concerns | No serious concerns | No serious concerns | No serious concerns | Moderate | Indirectness                                 |
| 4:42       | No serious concerns | Serious concerns | No serious concerns | Serious concerns    | No serious concerns | Moderate | Indirectness, Imprecision                    |
| 5:8        | Serious concerns    | Serious concerns | No serious concerns | Serious concerns    | No serious concerns | Low      | Study limitations, Indirectness, Imprecision |
| 5:12       | No serious concerns | Serious concerns | No serious concerns | Serious concerns    | No serious concerns | Moderate | Indirectness, Imprecision                    |





|       |                     |                  |                     |                     |                     |          |                           |
|-------|---------------------|------------------|---------------------|---------------------|---------------------|----------|---------------------------|
| 32:42 | No serious concerns | Serious concerns | No serious concerns | No serious concerns | No serious concerns | Moderate | Indirectness              |
| 36:39 | No serious concerns | Serious concerns | No serious concerns | Serious concerns    | No serious concerns | Moderate | Indirectness, Imprecision |
| 36:40 | No serious concerns | Serious concerns | No serious concerns | No serious concerns | No serious concerns | Moderate | Indirectness              |
| 36:42 | No serious concerns | Serious concerns | No serious concerns | Serious concerns    | No serious concerns | Moderate | Indirectness, Imprecision |
| 39:40 | No serious concerns | Serious concerns | No serious concerns | No serious concerns | No serious concerns | Moderate | Indirectness              |
| 39:42 | No serious concerns | Serious concerns | No serious concerns | Serious concerns    | No serious concerns | Moderate | Indirectness, Imprecision |
| 40:42 | No serious concerns | Serious concerns | No serious concerns | No serious concerns | No serious concerns | Moderate | Indirectness              |



# GRADE evaluation for Progression-free survival

## Study limitations

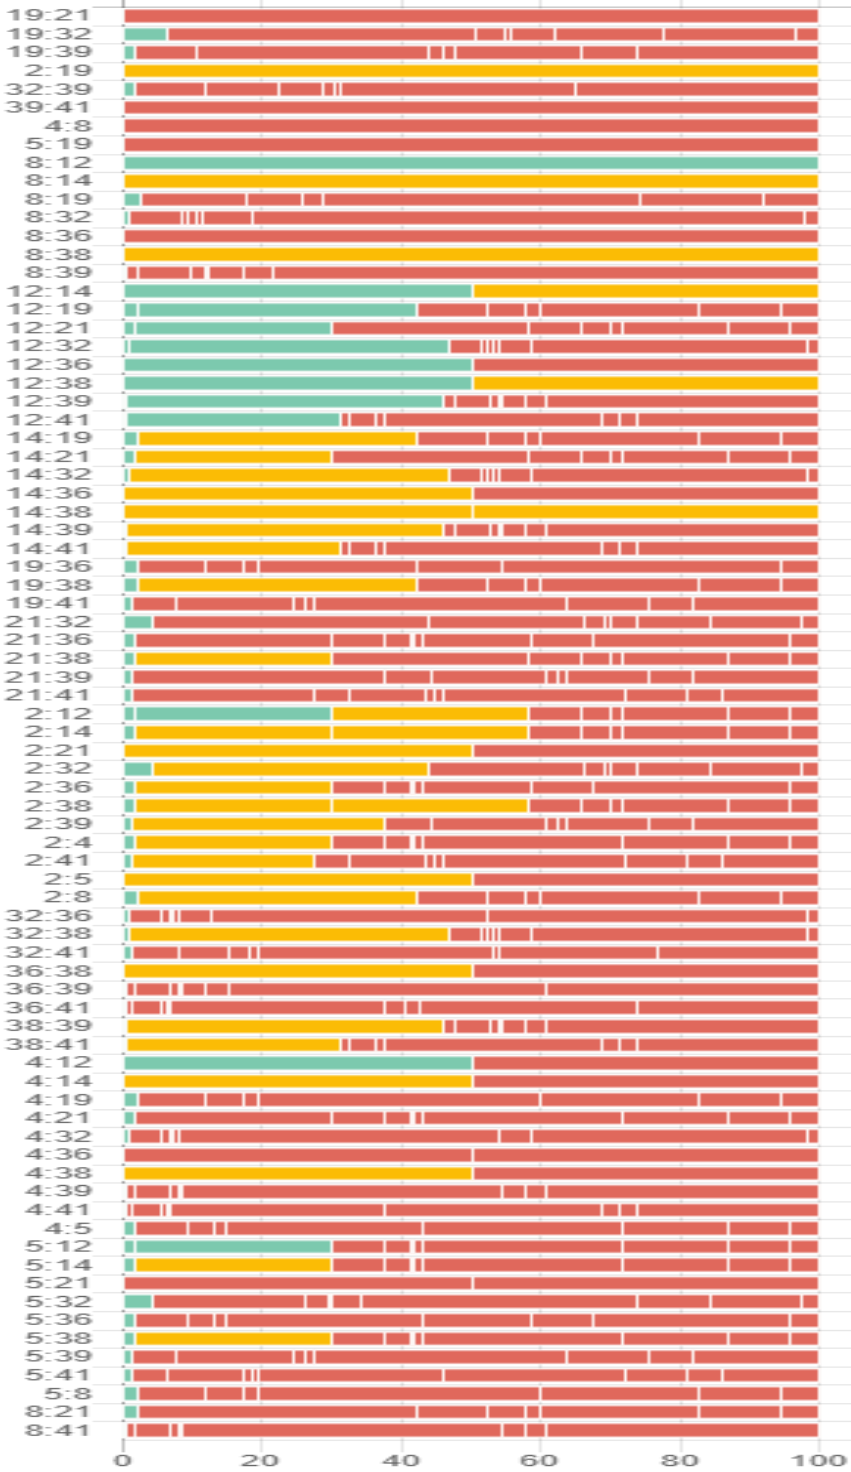

Treatment codes:

8=Docetaxel, 39=Pemetrexed, 19=Erlotinib, 32=Gefitinib, 36=Nivolumab, 38=Pembrolizumab,  
 4=Atezolizumab, 12=Docetaxel+Nintedanib, 14=Docetaxel+Ramucirumab, 2=Afatinib,  
 5=Cabozantinib, 21=Erlotinib+Cabozantinib, 41=Pemetrexed+Erlotinib

We have serious concerns for all comparisons that at least 50% of the evidence is at moderate risk of bias and very serious concerns when at least 50% of the evidence is at high risk of bias.

**Indirectness**

Given the small number of trials for most comparisons the transitivity assumption could not be evaluated properly. Therefore, we have serious concerns about intransitivity for all pairwise comparisons.

**Imprecision**

We downgraded all non-significant HRs for imprecision.

**Heterogeneity**

No empirical distributions for heterogeneity have been suggested for survival outcomes and therefore we rely on the prediction intervals. We downgraded comparisons that were statistically significant but the prediction interval crossed the line of no effect.

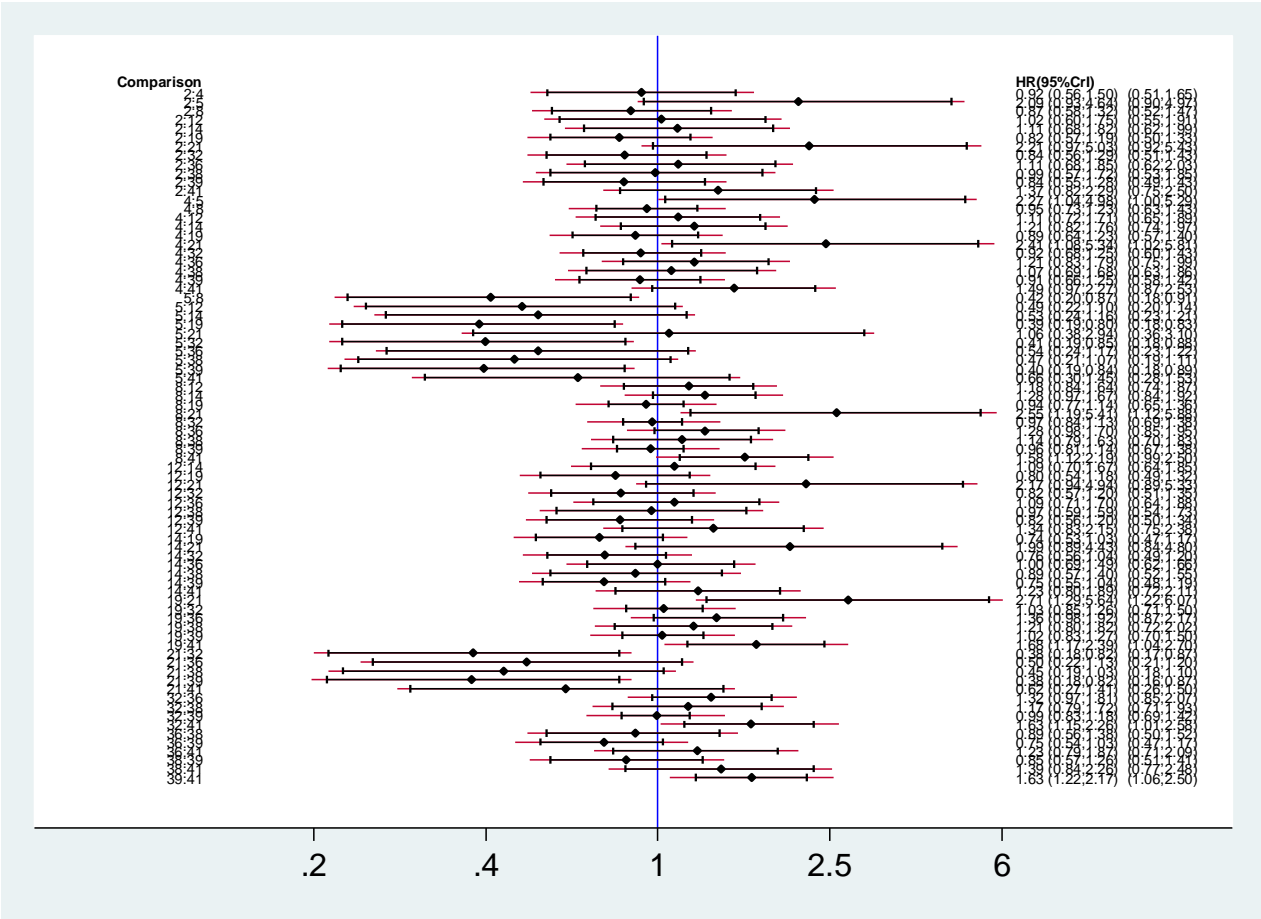

**Inconsistency**

Appendix Figure 4

We have serious concerns for comparisons included in inconsistent loops.

**Publication bias**

Appendix Figure 6 implies the presence of small-study effects which might be due to selective reporting bias and therefore we have serious concerns for all comparisons.

### Final assessments

| Comparison | Study Limitations     | Indirectness     | Inconsistency       | Imprecision         | Publication bias | GRADE    | Downgraded for                                                            |
|------------|-----------------------|------------------|---------------------|---------------------|------------------|----------|---------------------------------------------------------------------------|
| 2:4        | Very serious concerns | Serious concerns | No serious concerns | Serious concerns    | Serious concerns | Very low | Study limitations (2 levels), Indirectness, Imprecision, Publication bias |
| 2:5        | Serious concerns      | Serious concerns | No serious concerns | Serious concerns    | Serious concerns | Low      | Study limitations, Indirectness, Imprecision, Publication bias            |
| 2:8        | Very serious concerns | Serious concerns | No serious concerns | Serious concerns    | Serious concerns | Very low | Study limitations (2 levels), Indirectness, Imprecision, Publication bias |
| 2:12       | Serious concerns      | Serious concerns | No serious concerns | Serious concerns    | Serious concerns | Low      | Study limitations, Indirectness, Imprecision, Publication bias            |
| 2:14       | Serious concerns      | Serious concerns | No serious concerns | Serious concerns    | Serious concerns | Low      | Study limitations, Indirectness, Imprecision, Publication bias            |
| 2:19       | Serious concerns      | Serious concerns | No serious concerns | No serious concerns | Serious concerns | Low      | Study limitations, Indirectness, Publication bias                         |
| 2:21       | Serious concerns      | Serious concerns | No serious concerns | Serious concerns    | Serious concerns | Low      | Study limitations, Indirectness, Imprecision, Publication bias            |
| 2:32       | Serious concerns      | Serious concerns | No serious concerns | Serious concerns    | Serious concerns | Low      | Study limitations, Indirectness, Imprecision, Publication bias            |
| 2:36       | Very serious concerns | Serious concerns | No serious concerns | Serious concerns    | Serious concerns | Very low | Study limitations (2 levels), Indirectness, Imprecision, Publication bias |
| 2:38       | Serious concerns      | Serious concerns | No serious concerns | Serious concerns    | Serious concerns | Low      | Study limitations, Indirectness, Imprecision, Publication bias            |
| 2:39       | Serious concerns      | Serious concerns | No serious concerns | Serious concerns    | Serious concerns | Low      | Study limitations, Indirectness, Imprecision, Publication bias            |
| 2:41       | Very serious concerns | Serious concerns | No serious concerns | Serious concerns    | Serious concerns | Very low | Study limitations (2 levels), Indirectness, Imprecision, Publication bias |
| 4:5        | Very serious concerns | Serious concerns | No serious concerns | Serious concerns    | Serious concerns | Very low | Study limitations (2 levels), Indirectness, Imprecision, Publication bias |
| 4:8        | Very serious concerns | Serious concerns | No serious concerns | No serious concerns | Serious concerns | Very low | Study limitations (2 levels), Indirectness, Publication bias              |



|       |                       |                  |                                  |                     |                  |          |                                                                             |
|-------|-----------------------|------------------|----------------------------------|---------------------|------------------|----------|-----------------------------------------------------------------------------|
| 5:38  | Very serious concerns | Serious concerns | No serious concerns              | Serious concerns    | Serious concerns | Very low | Study limitations (2 levels), Indirectness, Imprecision, Publication bias   |
| 5:39  | Very serious concerns | Serious concerns | No serious concerns              | Serious concerns    | Serious concerns | Very low | Study limitations (2 levels), Indirectness, Imprecision, Publication bias   |
| 5:41  | Very serious concerns | Serious concerns | No serious concerns              | Serious concerns    | Serious concerns | Very low | Study limitations (2 levels), Indirectness, Imprecision, Publication bias   |
| 8:12  | No serious concerns   | Serious concerns | No serious concerns              | Serious concerns    | Serious concerns | Low      | Indirectness, Imprecision, Publication bias                                 |
| 8:14  | Serious concerns      | Serious concerns | No serious concerns              | Serious concerns    | Serious concerns | Low      | Study limitations, Indirectness, Imprecision, Publication bias              |
| 8:19  | Very serious concerns | Serious concerns | Serious concerns (incoherence)   | Serious concerns    | Serious concerns | Very low | Study limitations (2 levels), Indirectness, Inconsistency, Publication bias |
| 8:21  | Very serious concerns | Serious concerns | No serious concerns              | Serious concerns    | Serious concerns | Very low | Study limitations (2 levels), Indirectness, Imprecision, Publication bias   |
| 8:32  | Very serious concerns | Serious concerns | Serious concerns (heterogeneity) | Serious concerns    | Serious concerns | Very low | Study limitations (2 levels), Indirectness, Inconsistency, Publication bias |
| 8:36  | Very serious concerns | Serious concerns | No serious concerns              | No serious concerns | Serious concerns | Very low | Study limitations (2 levels), Indirectness, Publication bias                |
| 8:38  | Serious concerns      | Serious concerns | No serious concerns              | No serious concerns | Serious concerns | Low      | Study limitations, Indirectness, Publication bias                           |
| 8:39  | Very serious concerns | Serious concerns | Serious concerns (incoherence)   | Serious concerns    | Serious concerns | Very low | Study limitations (2 levels), Indirectness, Inconsistency, Publication bias |
| 8:41  | Very serious concerns | Serious concerns | No serious concerns              | No serious concerns | Serious concerns | Very low | Study limitations (2 levels), Indirectness, Publication bias                |
| 12:14 | No serious concerns   | Serious concerns | No serious concerns              | Serious concerns    | Serious concerns | Low      | Indirectness, Imprecision, Publication bias                                 |
| 12:19 | Very serious concerns | Serious concerns | No serious concerns              | Serious concerns    | Serious concerns | Very low | Study limitations (2 levels), Indirectness, Imprecision, Publication bias   |
| 12:21 | Very serious concerns | Serious concerns | No serious concerns              | Serious concerns    | Serious concerns | Very low | Study limitations (2 levels), Indirectness, Imprecision, Publication bias   |
| 12:32 | Serious concerns      | Serious concerns | No serious concerns              | Serious concerns    | Serious concerns | Low      | Study limitations, Indirectness, Imprecision, Publication bias              |
| 12:36 | Serious concerns      | Serious concerns | No serious concerns              | Serious concerns    | Serious concerns | Low      | Study limitations, Indirectness,                                            |

|       |                       |                  |                                |                     |                  |          |                                                                                                   |
|-------|-----------------------|------------------|--------------------------------|---------------------|------------------|----------|---------------------------------------------------------------------------------------------------|
|       |                       |                  |                                |                     |                  |          | Imprecision,<br>Publication bias                                                                  |
| 12:38 | No serious concerns   | Serious concerns | No serious concerns            | Serious concerns    | Serious concerns | Low      | Indirectness,<br>Imprecision,<br>Publication bias                                                 |
| 12:39 | Serious concerns      | Serious concerns | No serious concerns            | Serious concerns    | Serious concerns | Low      | Study limitations,<br>Indirectness,<br>Imprecision,<br>Publication bias                           |
| 12:41 | Very serious concerns | Serious concerns | No serious concerns            | Serious concerns    | Serious concerns | Very low | Study limitations (2 levels), Indirectness,<br>Imprecision,<br>Publication bias                   |
| 14:19 | Serious concerns      | Serious concerns | No serious concerns            | Serious concerns    | Serious concerns | Low      | Study limitations,<br>Indirectness,<br>Imprecision,<br>Publication bias                           |
| 14:21 | Very serious concerns | Serious concerns | No serious concerns            | Serious concerns    | Serious concerns | Very low | Study limitations (2 levels), Indirectness,<br>Imprecision,<br>Publication bias                   |
| 14:32 | Serious concerns      | Serious concerns | No serious concerns            | Serious concerns    | Serious concerns | Low      | Study limitations,<br>Indirectness,<br>Imprecision,<br>Publication bias                           |
| 14:36 | Serious concerns      | Serious concerns | No serious concerns            | Serious concerns    | Serious concerns | Low      | Study limitations,<br>Indirectness,<br>Imprecision,<br>Publication bias                           |
| 14:38 | Serious concerns      | Serious concerns | No serious concerns            | Serious concerns    | Serious concerns | Low      | Study limitations,<br>Indirectness,<br>Imprecision,<br>Publication bias                           |
| 14:39 | Serious concerns      | Serious concerns | No serious concerns            | Serious concerns    | Serious concerns | Low      | Study limitations,<br>Indirectness,<br>Imprecision,<br>Publication bias                           |
| 14:41 | Very serious concerns | Serious concerns | No serious concerns            | Serious concerns    | Serious concerns | Very low | Study limitations (2 levels), Indirectness,<br>Imprecision,<br>Publication bias                   |
| 19:21 | Very serious concerns | Serious concerns | No serious concerns            | Serious concerns    | Serious concerns | Very low | Study limitations (2 levels), Indirectness,<br>Imprecision,<br>Publication bias                   |
| 19:32 | Very serious concerns | Serious concerns | Serious concerns (incoherence) | Serious concerns    | Serious concerns | Very low | Study limitations (2 levels), Indirectness,<br>Inconsistency,<br>Imprecision,<br>Publication bias |
| 19:36 | Very serious concerns | Serious concerns | No serious concerns            | No serious concerns | Serious concerns | Very low | Study limitations (2 levels), Indirectness,<br>Publication bias                                   |
| 19:38 | Serious concerns      | Serious concerns | No serious concerns            | No serious concerns | Serious concerns | Low      | Study limitations,<br>Indirectness,<br>Publication bias                                           |
| 19:39 | Very serious concerns | Serious concerns | No serious concerns            | Serious concerns    | Serious concerns | Very low | Study limitations (2 levels), Indirectness,<br>Imprecision,<br>Publication bias                   |
